# Supplementary material for: Traditional and systems biology based drug discovery for the rare tumor syndrome neurofibromatosis type 2
Source: PLoS One. 2018 Jun 13;13(6):e0197350. doi: 10.1371/journal.pone.0197350 (PMC5999111; doi:10.1371/journal.pone.0197350)
Supplement: S5 Table — Transcriptomic differences in isogenic pairs of untreated and drug-treated merlin -deficient and merlin-wildtype human arachnoidal cells and Schwann cells (A) and mouse Schwann cells (B) (XLSX) [file pone.0197350.s005.xlsx]

## Sheet: 5A-Human
Supplemental Table 5A. Transcriptomic differences in isogenic pairs of untreated and drug-treated merlin-deficient and merlin-expressing human AC and SC
		Syn5DMSO vs Syn1DMSO		HS01DMSO vs HS11DMSO		Syn1CUDC-907 vs Syn1DMSO		Syn1Panobinostat vs Syn1DMSO		Syn1GSK2126458 vs Syn1DMSO		Syn5CUDC-907 vs Syn5DMSO		Syn5Panobinostat vs Syn5DMSO		Syn5GSK2126458 vs Syn5DMSO		Syn6CUDC-907 vs Syn6DMSO		Syn6Panobinostat vs Syn6DMSO		Syn6GSK2126458 vs Syn6DMSO		HS01CUDC-907 vs HS01DMSO		HS01Panobinostat vs HS01DMSO		HS01GSK2126458 vs HS01DMSO		HS11CUDC-907 vs HS11DMSO		HS11Panobinostat vs HS11DMSO		HS11GSK2126458 vs HS11DMSO
GeneID (Ensembl)	Gene Symbol	logFC	BH adj. pvalue	logFC	BH adj. pvalue	logFC	BH adj. pvalue	logFC	BH adj. pvalue	logFC	BH adj. pvalue	logFC	BH adj. pvalue	logFC	BH adj. pvalue	logFC	BH adj. pvalue	logFC	BH adj. pvalue	logFC	BH adj. pvalue	logFC	BH adj. pvalue	logFC	BH adj. pvalue	logFC	BH adj. pvalue	logFC	BH adj. pvalue	logFC	BH adj. pvalue	logFC	BH adj. pvalue	logFC	BH adj. pvalue
ENSG00000121410	A1BG	0.0940505	0.933702	-0.27331	0.883118	-0.614147	0.195694	-0.574148	0.223572	-0.0794534	0.933533	-0.444134	0.354455	-0.410368	0.388198	0.00655041	0.994351	NA	NA	NA	NA	NA	NA	0.609799	0.460125	0.0849989	0.89369	0.534364	0.417936	0.00254685	0.999622	0.980942	0.058042	1.36937	0.0148417
ENSG00000268895	A1BG-AS1	0.205482	0.733352	-0.146176	0.790747	0.471265	0.115158	1.15792	0.000341498	0.192345	0.720713	0.730868	0.0167093	1.18124	0.000275152	0.163613	0.709052	4.89395	2.81843e-08	NA	NA	NA	NA	-0.0724873	0.828878	0.448965	0.0340341	-0.0568784	0.839241	0.0255661	0.981588	0.603698	0.0027551	0.397007	0.0505064
ENSG00000175899	A2M	NA	NA	-1.00853	0.372894	NA	NA	NA	NA	NA	NA	NA	NA	NA	NA	NA	NA	NA	NA	NA	NA	NA	NA	-0.117025	0.927123	0.245914	0.752413	0.666868	0.420719	0.333534	0.872705	-0.463523	0.511611	0.264948	0.732091
ENSG00000245105	A2M-AS1	NA	NA	NA	NA	NA	NA	NA	NA	NA	NA	3.23329	0.000123249	NA	NA	NA	NA	2.87762	0.000338011	2.08341	0.00695521	NA	NA	NA	NA	NA	NA	NA	NA	NA	NA	NA	NA	NA	NA
ENSG00000166535	A2ML1	NA	NA	NA	NA	NA	NA	NA	NA	NA	NA	NA	NA	NA	NA	NA	NA	8.39011	5.73939e-06	NA	NA	NA	NA	NA	NA	NA	NA	NA	NA	NA	NA	NA	NA	NA	NA
ENSG00000128274	A4GALT	-0.756635	0.0044689	-0.619971	0.213983	0.605665	0.00749855	0.0617995	0.808338	0.0301533	0.952698	1.37704	1.61129e-08	1.07728	1.49364e-06	0.580215	0.0410267	1.00503	9.62722e-06	1.01325	8.75369e-06	0.466909	0.0998684	0.299764	0.568699	1.08336	0.00398385	1.11095	0.00550364	0.131953	0.913127	1.20147	0.000766356	0.95254	0.00712002
ENSG00000198156	A-575C2.4	NA	NA	NA	NA	NA	NA	NA	NA	NA	NA	NA	NA	NA	NA	NA	NA	0.46846	0.417179	0.52672	0.352418	1.42346	0.028317	NA	NA	NA	NA	NA	NA	NA	NA	NA	NA	NA	NA
ENSG00000094914	AAAS	0.0415692	0.941053	-0.127599	0.919918	-0.796438	0.000175716	-0.408055	0.0610139	-0.277242	0.427197	-0.672302	0.00166189	-0.395219	0.0693021	-0.272824	0.360132	-0.234049	0.304214	-0.0309606	0.903025	-0.0625101	0.860404	0.00131614	0.99883	-1.06589	0.00314675	-1.04187	0.00717508	-0.209038	0.799806	-0.444121	0.153797	-0.76057	0.0259072
ENSG00000081760	AACS	0.132249	0.792779	0.337059	0.230342	-0.129019	0.597093	-0.0737669	0.767102	0.00639537	0.990578	-0.15689	0.516455	0.0172494	0.947427	-0.309523	0.30699	-0.541014	0.0154934	-0.47872	0.0341764	-0.223366	0.467747	0.0109545	0.97712	-0.295	0.14895	-0.349685	0.113149	0.0515227	0.94798	-0.42774	0.0320744	-0.649853	0.00279139
ENSG00000250420	AACSP1	NA	NA	NA	NA	9.94957	1.10837e-11	9.57997	2.62161e-11	NA	NA	7.68625	1.05965e-10	7.44976	1.83686e-10	NA	NA	5.49178	1.62964e-08	3.58878	2.94962e-05	NA	NA	NA	NA	NA	NA	NA	NA	NA	NA	NA	NA	NA	NA
ENSG00000114771	AADAC	NA	NA	NA	NA	4.09503	0.000406894	3.10973	0.00666667	NA	NA	3.10325	0.00109544	NA	NA	NA	NA	3.83444	0.00095299	NA	NA	NA	NA	NA	NA	NA	NA	NA	NA	NA	NA	NA	NA	NA	NA
ENSG00000109576	AADAT	0.434472	0.314871	0.487223	0.143383	-1.45681	3.49429e-07	-1.22923	1.37607e-05	0.244171	0.618474	-1.35452	2.07941e-06	-1.25479	9.0795e-06	-0.149343	0.729504	-1.03562	0.000271156	-1.63072	1.7692e-08	0.158805	0.710263	-0.867395	0.00594507	-1.62674	2.2536e-06	-1.32911	6.01492e-05	-0.392842	0.266562	-1.13912	6.88975e-05	-1.14872	0.000131718
ENSG00000158122	AAED1	0.306003	0.455683	-0.183547	0.639653	0.00993853	0.97172	-0.660551	0.00621179	0.211018	0.619305	-0.262008	0.303482	-0.745691	0.00184338	0.151944	0.679064	-0.970853	4.99741e-05	-1.26112	1.79109e-07	-0.186588	0.586866	0.110327	0.695615	-1.00611	2.00036e-05	-0.065614	0.793795	-0.121686	0.78719	-1.2803	3.67626e-07	0.0793105	0.695155
ENSG00000103591	AAGAB	0.0385617	0.944939	0.0172861	0.987324	-0.12602	0.580886	0.463684	0.0267761	-0.38522	0.215317	0.106727	0.643209	0.514251	0.0133544	-0.462129	0.0816539	-0.14329	0.530671	0.396106	0.0652703	-0.532999	0.0344409	-0.0219816	0.930678	0.614725	0.000154483	-0.590073	0.000397394	-0.05665	0.897136	0.448203	0.00197409	-0.61539	0.000155471
ENSG00000115977	AAK1	0.180516	0.703638	-0.367636	0.696217	-0.253713	0.301459	-0.104903	0.685025	-0.19486	0.638441	-0.482757	0.0415471	-0.407568	0.08517	-0.384047	0.212765	0.0114502	0.966002	0.090261	0.734383	-0.361821	0.228879	-0.0350855	0.964149	-0.36833	0.384142	-0.274186	0.591441	-0.337334	0.690098	0.340952	0.378874	0.448964	0.27472
ENSG00000087884	AAMDC	-0.301086	0.440711	-0.21785	0.911676	0.37441	0.114887	0.538354	0.0203308	-0.322976	0.379308	0.900625	8.55892e-05	1.05259	3.96516e-06	0.0893057	0.815218	0.93726	5.14103e-05	1.14618	1.20863e-06	0.505483	0.0776187	0.465214	0.561401	0.790673	0.145554	0.577152	0.356917	0.173284	0.93267	1.71635	0.00136763	1.06872	0.0434655
ENSG00000127837	AAMP	0.0942989	0.846061	0.227421	0.611617	-0.0649264	0.781068	0.397586	0.0581212	-0.373004	0.2256	0.166251	0.456051	0.559879	0.00650116	-0.270865	0.338227	0.421888	0.0463421	0.832528	0.000101347	-0.116993	0.710263	0.249348	0.44713	0.405505	0.0758809	0.0590473	0.846516	0.196313	0.651832	0.966992	6.34351e-05	0.146588	0.530829
ENSG00000131043	AAR2	0.0908604	0.861168	-0.0429798	0.966046	-0.908666	2.10901e-05	-0.627879	0.0035477	-0.121969	0.773153	-0.793424	0.000213958	-0.59687	0.00552611	-0.208156	0.505701	-0.719302	0.000863043	-0.82385	0.000136669	-0.373285	0.176208	-0.0450579	0.890476	-0.878626	0.000118675	0.261117	0.220439	0.107425	0.821309	-0.82836	0.000119594	0.00597478	0.978762
ENSG00000205002	AARD	NA	NA	NA	NA	NA	NA	NA	NA	NA	NA	NA	NA	NA	NA	NA	NA	NA	NA	NA	NA	NA	NA	NA	NA	NA	NA	NA	NA	1.60292	0.0138275	2.45545	3.66891e-05	1.41784	0.0107664
ENSG00000090861	AARS	-0.635869	0.0517021	0.0898526	0.830758	-0.330632	0.182931	-0.492416	0.0501125	0.128734	0.780737	0.179447	0.483028	-0.168296	0.513511	0.346519	0.290359	1.09862	8.48634e-05	0.674856	0.00872016	0.318919	0.322303	0.240401	0.224129	-0.000685209	0.996828	-0.947566	5.93296e-06	0.169778	0.459893	0.0791894	0.574821	-0.786522	1.96765e-05
ENSG00000124608	AARS2	0.0375707	0.957366	0.344604	0.125383	-1.5285	1.74373e-06	-0.637696	0.0157042	-0.667071	0.0842148	-1.08427	0.000171523	-0.554077	0.0338321	-0.745118	0.028154	-0.556507	0.0356763	-0.423285	0.110802	-0.313689	0.359206	-0.418906	0.0624547	-0.198642	0.263532	-0.744526	0.000386163	-0.137262	0.690002	-0.251396	0.137302	-0.890514	3.39394e-05
ENSG00000266967	AARSD1	0.044865	0.939686	-0.106854	0.964526	-0.373703	0.107294	0.169456	0.48547	-0.213286	0.587997	-0.331477	0.158229	0.10073	0.684773	-0.233911	0.468042	-0.308001	0.191464	-0.0844753	0.743534	-0.40893	0.152612	0.0790317	0.921667	-0.96633	0.0380227	-0.547221	0.296659	-0.3954	0.659605	-0.103168	0.824193	-0.450661	0.329881
ENSG00000157426	AASDH	-0.169127	0.739386	-0.00340144	0.999513	0.710726	0.00295062	0.857712	0.000308594	0.185312	0.67093	0.63452	0.00858281	0.790112	0.000897342	0.0232442	0.958176	1.21457	4.6594e-07	0.897481	0.000187449	0.533234	0.0709559	-0.121079	0.90037	1.23312	0.03106	-0.350984	0.604309	0.351022	0.785681	0.295729	0.594407	-0.531547	0.354226
ENSG00000149313	AASDHPPT	-0.0477676	0.929603	-0.0190702	0.990195	-0.382238	0.0741815	-0.0909216	0.69666	-0.0189752	0.96894	-0.566066	0.00715432	-0.379127	0.0747672	0.0242876	0.949758	-0.311607	0.154669	-0.205306	0.366689	0.178627	0.54846	0.0497236	0.86729	-0.149408	0.415155	0.0836285	0.700394	0.0445281	0.94797	-0.447521	0.0120161	-0.159404	0.37052
ENSG00000008311	AASS	0.468013	0.126691	0.517944	0.500085	0.708117	0.00138646	1.41374	1.01464e-09	0.0254442	0.959289	0.269975	0.248243	0.839	0.000129882	0.00543183	0.9912	0.4008	0.0799886	0.711359	0.00144951	0.535449	0.047821	-0.364311	0.589206	0.748592	0.0957764	-1.1112	0.0256849	0.291898	0.774283	0.349076	0.42196	-1.00881	0.0293771
ENSG00000108270	AATF	0.0390471	0.94596	NA	NA	-1.17869	2.93493e-08	-0.68305	0.00127825	-0.41262	0.194216	-1.11712	1.41297e-07	-0.68973	0.00110434	-0.415405	0.133797	-0.90078	2.3413e-05	-0.840869	8.21416e-05	-0.64722	0.010828	NA	NA	NA	NA	NA	NA	NA	NA	NA	NA	NA	NA
ENSG00000181409	AATK	NA	NA	NA	NA	1.85306	0.000406894	NA	NA	NA	NA	0.533446	0.289319	NA	NA	NA	NA	3.24461	2.89276e-05	NA	NA	NA	NA	NA	NA	NA	NA	NA	NA	NA	NA	NA	NA	NA	NA
ENSG00000225200	AB019441.29	-0.0773393	0.927564	NA	NA	-0.729232	0.0450125	-0.342648	0.355764	0.405313	0.45112	-0.429711	0.252603	-0.482684	0.188116	0.370493	0.420878	-0.19861	0.617044	-0.417661	0.272244	0.148767	0.781443	NA	NA	NA	NA	NA	NA	NA	NA	NA	NA	NA	NA
ENSG00000183044	ABAT	0.615026	0.494554	-0.89115	0.468169	5.63464	5.86691e-12	6.21357	1.25836e-12	NA	NA	5.80281	2.43409e-12	6.18052	8.92265e-13	-0.963829	0.166058	3.74965	1.22644e-09	4.03176	4.50619e-10	0.200815	0.735824	0.713702	0.510223	3.66463	6.8739e-05	-1.13222	0.172507	1.02971	0.291489	2.57843	0.000562045	-0.867061	0.23567
ENSG00000226210	ABC7-42389800N19.1	-0.057857	0.939218	NA	NA	-0.174461	0.591087	0.00474794	0.989127	0.117764	0.8401	-0.2312	0.473896	-0.240233	0.449593	0.186249	0.669855	0.0615821	0.859586	-0.393099	0.219383	0.154081	0.737796	NA	NA	NA	NA	NA	NA	NA	NA	NA	NA	NA	NA
ENSG00000165029	ABCA1	-2.12726	0.00079244	-0.614081	0.458994	0.0895437	0.862962	-0.777904	0.108998	0.538958	0.486179	2.25547	6.15124e-05	1.04332	0.0340895	1.52497	0.0163139	1.45904	0.0044754	1.15602	0.0213334	1.00243	0.0977529	-0.846443	0.210944	-1.0763	0.0332263	1.0918	0.044736	-0.449888	0.622988	-2.20114	0.000136075	-0.120486	0.827749
ENSG00000154263	ABCA10	-1.12589	0.0188783	NA	NA	0.513899	0.161189	-0.0238596	0.953039	0.877073	0.0935349	1.30185	0.00114119	0.911018	0.0174129	0.508972	0.305382	2.3352	1.59778e-06	1.85933	3.96013e-05	1.08114	0.0289391	NA	NA	NA	NA	2.53449	2.35183e-05	NA	NA	NA	NA	2.06764	4.93117e-05
ENSG00000251595	ABCA11P	0.246144	0.657387	0.429054	0.119569	-1.56059	1.01881e-07	-1.49539	2.92221e-07	-0.279965	0.567837	-1.75695	3.62846e-09	-1.74402	3.80832e-09	-0.526436	0.151048	-1.04779	0.000354036	-1.19206	4.92175e-05	-0.136423	0.761496	-0.188496	0.547081	-1.1629	1.46187e-05	-0.117864	0.649709	0.0709686	0.928223	-0.887333	0.000176919	-0.023978	0.923696
ENSG00000144452	ABCA12	NA	NA	NA	NA	NA	NA	NA	NA	NA	NA	NA	NA	NA	NA	NA	NA	2.15357	0.00627495	NA	NA	NA	NA	NA	NA	NA	NA	NA	NA	NA	NA	NA	NA	NA	NA
ENSG00000179869	ABCA13	NA	NA	0.113974	0.966707	NA	NA	NA	NA	NA	NA	NA	NA	NA	NA	NA	NA	3.17088	3.31136e-06	2.21525	0.000251508	NA	NA	-0.58111	0.452701	-0.234828	0.673128	-2.27188	0.000693406	0.0483233	0.988054	-0.606415	0.231847	-1.35952	0.0152376
ENSG00000238098	ABCA17P	NA	NA	NA	NA	NA	NA	NA	NA	NA	NA	NA	NA	NA	NA	NA	NA	NA	NA	NA	NA	0.344574	0.72398	NA	NA	NA	NA	NA	NA	NA	NA	NA	NA	NA	NA
ENSG00000107331	ABCA2	-0.302341	0.360197	-0.740868	0.0456422	1.02772	1.7728e-06	0.744158	0.000270876	0.358255	0.2504	1.06308	1.19819e-06	0.920904	1.04626e-05	0.539708	0.0357559	0.792108	0.000129491	0.459295	0.0301113	0.517516	0.0387668	0.173331	0.698153	0.824249	0.00707981	0.5729	0.0706037	0.321913	0.484362	0.216234	0.450422	0.554751	0.0523184
ENSG00000167972	ABCA3	-0.199576	0.607382	-1.62884	0.00538912	0.177445	0.423774	-0.0611748	0.792217	0.526778	0.0724854	0.271366	0.209467	0.199843	0.359604	0.513709	0.0466983	0.23818	0.278653	0.0194786	0.936614	0.511393	0.0406827	2.14995	0.000469223	3.85092	1.41537e-07	2.73041	1.67172e-05	1.46801	0.00408352	2.20379	1.78167e-05	2.1681	4.24332e-05
ENSG00000198691	ABCA4	-0.391471	0.504763	-1.05078	0.0462457	0.832249	0.0181453	-0.267388	0.456115	0.196855	0.755391	1.37482	0.000301395	0.384548	0.275707	0.295159	0.543284	1.69158	3.13994e-05	0.958495	0.00855127	0.673443	0.120354	2.74094	5.92707e-06	2.70825	8.72569e-07	0.990779	0.0264627	2.20084	1.21491e-05	2.32243	8.27768e-07	1.51505	0.000292685
ENSG00000154265	ABCA5	-0.575414	0.0320137	-0.148072	0.85777	1.04864	9.2143e-06	0.801083	0.000295481	0.187757	0.620536	1.31996	3.1154e-07	1.06869	7.69273e-06	0.253683	0.39773	1.55096	3.42301e-08	1.32776	4.4263e-07	0.488511	0.0640936	-0.132076	0.755461	0.303166	0.270306	1.30006	0.000154078	-0.25263	0.615573	0.0584318	0.838032	1.11682	0.00025286
ENSG00000154262	ABCA6	-2.97077	0.000304562	-3.16435	0.0174607	-0.140014	0.81047	-0.812357	0.141191	1.50051	0.0462472	1.99902	0.00429979	NA	NA	NA	NA	NA	NA	NA	NA	NA	NA	NA	NA	NA	NA	5.76247	6.96226e-05	-0.805249	0.653035	-3.35504	0.00211525	3.00054	0.00231282
ENSG00000064687	ABCA7	-0.486482	0.247699	-1.229	0.0107639	3.24654	1.30073e-11	3.03982	4.65221e-11	0.425723	0.324896	3.21668	1.93066e-11	3.17564	2.34753e-11	0.365265	0.336451	3.06043	7.03801e-11	2.63713	9.55805e-10	0.819754	0.0207885	1.94062	0.000149272	3.61403	1.97709e-08	1.17608	0.00565704	1.39379	0.00136039	2.33697	7.14451e-07	0.769559	0.0335877
ENSG00000141338	ABCA8	-2.20898	2.75527e-05	-1.38361	0.507664	-1.50701	0.000329183	-1.79883	4.44733e-05	1.064	0.0570676	-0.995649	0.0125703	-1.1842	0.00342991	1.19498	0.0161665	-0.576708	0.141619	-0.724282	0.0664783	1.64466	0.00120956	-0.623541	0.730699	-0.943829	0.43739	1.37852	0.300957	-0.166798	0.97896	-1.95179	0.0941989	1.35817	0.22828
ENSG00000154258	ABCA9	-3.65861	1.74884e-07	NA	NA	-1.13938	0.00761534	-1.45114	0.00105389	1.70077	0.00718937	1.31429	0.00907993	1.02218	0.0385772	1.93472	0.00275043	1.40525	0.00871591	NA	NA	NA	NA	NA	NA	NA	NA	6.2873	9.35224e-06	NA	NA	NA	NA	4.9295	8.20231e-06
ENSG00000085563	ABCB1	NA	NA	1.15172	0.154319	9.38836	3.51033e-07	9.57191	2.17592e-07	NA	NA	7.89702	4.67069e-08	8.02086	3.28267e-08	NA	NA	5.26995	3.85449e-06	4.59014	3.08556e-05	NA	NA	0.336834	0.710113	1.65343	0.00781284	-0.140769	0.858919	0.689006	0.480947	0.980426	0.0900371	NA	NA
ENSG00000135776	ABCB10	0.53143	0.124078	0.227622	0.873803	-1.50665	1.94282e-06	-1.60194	7.26801e-07	0.176763	0.692778	-1.92079	4.27626e-08	-2.17417	4.77432e-09	-0.190032	0.598883	-2.26053	4.29813e-09	-2.31308	3.05585e-09	-0.375734	0.239297	-0.496225	0.469239	-1.52192	0.00254204	-0.788616	0.118283	-0.165326	0.920398	-2.17466	8.53692e-05	-0.930078	0.0460266
ENSG00000073734	ABCB11	-2.3473	0.00547552	NA	NA	-0.410813	0.532659	-2.09366	0.00282156	0.0084707	0.994945	NA	NA	NA	NA	NA	NA	NA	NA	NA	NA	NA	NA	NA	NA	NA	NA	NA	NA	NA	NA	NA	NA	NA	NA
ENSG00000005471	ABCB4	NA	NA	NA	NA	3.87652	0.000654819	NA	NA	NA	NA	NA	NA	NA	NA	NA	NA	3.12528	0.00283296	NA	NA	NA	NA	NA	NA	2.90042	0.000961358	NA	NA	1.30829	0.141141	NA	NA	NA	NA
ENSG00000115657	ABCB6	-0.253922	0.520343	-0.497985	0.226785	-0.341571	0.13636	-0.572556	0.0101502	-0.163208	0.691754	-0.209994	0.377437	-0.494769	0.0271467	-0.412531	0.155437	0.624727	0.00529829	0.562582	0.0127333	-0.331409	0.256866	0.601609	0.0991447	-0.388718	0.172169	-1.70742	2.08692e-05	0.00650689	0.997408	-0.369896	0.16133	-1.34369	0.000105755
ENSG00000131269	ABCB7	-0.200374	0.670035	0.103976	0.858137	-0.345548	0.159347	-0.381834	0.116869	0.0753652	0.876071	-0.784713	0.000954831	-0.646021	0.00644946	0.0698821	0.863285	-0.282897	0.259804	-0.316881	0.206736	0.0489764	0.902888	0.163846	0.571132	-0.202431	0.303136	0.390565	0.0642494	0.272236	0.315327	-0.479574	0.0131111	0.248525	0.196081
ENSG00000197150	ABCB8	0.114312	0.820947	0.0278169	0.988956	-0.636024	0.00364141	-0.680322	0.00181372	-0.474679	0.136152	-0.444019	0.0465055	-0.508683	0.020775	-0.401566	0.160632	-0.189613	0.421506	-0.289459	0.210885	-0.113634	0.736905	-0.231883	0.48842	-0.916552	0.00037999	-1.34339	1.97407e-05	-0.2061	0.625454	-0.668365	0.00305135	-0.892876	0.000493105
ENSG00000150967	ABCB9	0.405845	0.540942	-0.0600954	0.948713	1.01595	0.00802577	1.53775	0.000185438	-0.0821966	0.917448	0.950265	0.0126419	1.43467	0.000367109	-0.468764	0.360833	1.38153	0.000617172	1.31743	0.00104927	-0.246186	0.651802	0.0237104	0.947629	0.663802	0.00170328	-0.630892	0.00533075	-0.134329	0.76097	0.761721	0.000180908	-0.493774	0.0136961
ENSG00000103222	ABCC1	-0.973773	2.26072e-05	0.166408	0.965725	-0.706071	0.00070448	-1.22159	9.41899e-08	0.327129	0.314003	-0.441738	0.038539	-0.781116	0.000162029	0.0329295	0.93138	0.149245	0.516641	0.0913753	0.702947	0.0401599	0.910797	-0.611512	0.583978	0.403375	0.604676	-0.711949	0.404857	-0.283321	0.911342	-0.500335	0.493847	-1.14682	0.125613
ENSG00000124574	ABCC10	-0.128226	0.78797	0.105241	0.742333	0.809343	0.000110176	0.735362	0.000450463	0.111264	0.789681	0.926165	1.88566e-05	0.921309	2.17644e-05	0.153681	0.63171	1.03805	4.25388e-06	0.746614	0.000438387	0.226147	0.438979	-0.00234945	0.992989	-0.126984	0.362534	-0.00639774	0.974669	-0.0717326	0.845582	-0.21268	0.102463	-0.188773	0.161989
ENSG00000121270	ABCC11	NA	NA	NA	NA	NA	NA	NA	NA	NA	NA	NA	NA	NA	NA	NA	NA	NA	NA	0.889496	0.14722	NA	NA	NA	NA	NA	NA	NA	NA	NA	NA	NA	NA	NA	NA
ENSG00000140798	ABCC12	NA	NA	NA	NA	NA	NA	NA	NA	NA	NA	NA	NA	NA	NA	NA	NA	3.71488	0.000148238	NA	NA	NA	NA	NA	NA	NA	NA	NA	NA	NA	NA	NA	NA	NA	NA
ENSG00000023839	ABCC2	-0.850504	0.0612127	NA	NA	-0.506336	0.178721	-1.42716	0.000245822	0.475159	0.367032	0.691816	0.0653449	0.2558	0.517218	-0.0552148	0.930479	1.22346	0.000938742	0.2747	0.490608	-0.347734	0.479597	NA	NA	NA	NA	NA	NA	NA	NA	NA	NA	NA	NA
ENSG00000108846	ABCC3	-0.720002	0.35455	-1.96083	6.67587e-06	-1.73913	0.00136367	-3.198	1.56673e-06	0.907003	0.215873	-0.891511	0.0831204	-1.93076	0.000584887	0.630322	0.343572	-0.0437804	0.938992	-1.37141	0.0124416	0.510038	0.453881	2.23286	9.29876e-07	-0.416858	0.123719	1.17328	0.000432797	1.27328	0.000144143	-1.08802	0.000189797	0.307828	0.247424
ENSG00000125257	ABCC4	0.565213	0.0482836	0.0277617	0.994321	-0.312335	0.166066	-0.7214	0.00202787	-0.192024	0.619608	-0.213616	0.355686	-0.726153	0.00177177	-0.327705	0.263975	0.0466645	0.851286	-0.136611	0.572213	-0.287667	0.315355	-0.18868	0.816758	-1.57284	0.00399561	0.752555	0.181254	0.364794	0.732115	-1.85505	0.000822989	0.172806	0.755188
ENSG00000114770	ABCC5	-0.406342	0.186568	0.175615	0.827505	0.164464	0.476166	-0.14291	0.537882	0.417551	0.186626	0.31584	0.154758	0.177055	0.437008	0.526843	0.0505032	0.224432	0.323932	-0.0101782	0.967184	0.578931	0.0242369	-0.663686	0.0744227	-0.216812	0.459904	0.0113167	0.978256	-0.234488	0.67908	-0.739208	0.0100319	0.489846	0.0794438
ENSG00000091262	ABCC6	NA	NA	NA	NA	3.59498	3.83675e-08	2.9617	8.62391e-07	1.5067	0.0391597	2.87962	1.2959e-06	2.58278	6.65059e-06	NA	NA	4.1576	1.44324e-07	2.90886	4.88873e-05	NA	NA	NA	NA	NA	NA	1.31622	0.0170313	1.5297	0.0113283	NA	NA	NA	NA
ENSG00000256340	ABCC6P1	NA	NA	NA	NA	NA	NA	NA	NA	NA	NA	NA	NA	NA	NA	NA	NA	8.1754	2.30372e-07	NA	NA	NA	NA	NA	NA	NA	NA	NA	NA	NA	NA	NA	NA	NA	NA
ENSG00000006071	ABCC8	NA	NA	NA	NA	8.54557	4.16348e-08	NA	NA	NA	NA	NA	NA	7.96382	1.72456e-07	NA	NA	2.92234	1.05847e-05	1.59979	0.00503414	NA	NA	NA	NA	NA	NA	NA	NA	NA	NA	NA	NA	NA	NA
ENSG00000069431	ABCC9	2.47059	0.00102335	NA	NA	NA	NA	NA	NA	NA	NA	0.354006	0.501994	-0.0805535	0.886256	-1.72619	0.0133341	1.00822	0.0702431	0.397072	0.489383	NA	NA	NA	NA	NA	NA	NA	NA	NA	NA	NA	NA	NA	NA
ENSG00000101986	ABCD1	-0.714578	0.0286968	-0.943972	0.0348136	0.621536	0.0119307	0.369176	0.129604	0.252515	0.54259	1.46912	1.0172e-06	1.3619	3.0588e-06	0.467824	0.149705	1.07992	7.4971e-05	0.782111	0.00234348	0.112303	0.766187	0.649187	0.150441	0.723845	0.0367947	-0.00757767	0.988667	0.229609	0.763246	1.15327	0.000693724	0.165248	0.647691
ENSG00000173208	ABCD2	NA	NA	NA	NA	5.50082	1.33521e-09	5.28045	2.42581e-09	NA	NA	6.87526	2.8285e-09	6.86527	2.62355e-09	NA	NA	10.5619	1.1218e-09	10.1073	3.76031e-09	NA	NA	0.548345	0.681773	2.54611	0.00616266	NA	NA	1.33725	0.251411	2.36388	0.00489824	NA	NA
ENSG00000117528	ABCD3	-0.0466908	0.930024	0.0538356	0.987213	1.28534	2.4825e-08	1.45198	2.45569e-09	-0.150974	0.692418	1.23045	5.43789e-08	1.47495	1.81121e-09	-0.248951	0.387146	0.436861	0.039129	0.771863	0.000202092	-0.121395	0.697522	-0.199477	0.7612	1.39563	0.00228193	-0.521058	0.26933	0.0756474	0.969104	0.802388	0.0447376	-0.894752	0.0360469
ENSG00000119688	ABCD4	-0.364082	0.301895	0.100958	0.774773	-0.1851	0.449031	-0.131709	0.596873	0.496278	0.128807	0.000244841	0.999423	0.0476731	0.85439	0.476814	0.102195	-0.185722	0.449025	-0.235996	0.333067	0.466962	0.0972721	0.0535009	0.819398	-0.889374	3.50526e-06	1.24319	1.40197e-07	0.0278991	0.964185	-0.838877	4.17639e-06	1.13094	1.67868e-07
ENSG00000164163	ABCE1	0.510288	0.0546615	-0.199496	0.912912	-1.05857	9.09708e-07	-0.787911	0.000115538	-0.459206	0.122928	-1.32526	2.22297e-08	-1.24044	5.21079e-08	-0.760548	0.00251615	-1.77657	2.06322e-10	-1.48524	5.09236e-09	-0.965008	5.91506e-05	-0.560968	0.463504	-0.841142	0.106484	-0.694731	0.226798	-0.148254	0.938859	-1.46856	0.0058596	-1.48817	0.00704515
ENSG00000204574	ABCF1	0.155147	0.714715	-0.0329308	0.989091	-0.0255679	0.914289	0.0633329	0.785476	-0.537702	0.0653178	0.170574	0.444	0.295646	0.164682	-0.471286	0.071085	-0.144215	0.525673	-0.15129	0.509804	-0.741091	0.00206151	-0.045205	0.925303	-0.393969	0.150051	-0.463682	0.12906	-0.190861	0.756833	-0.0221575	0.937362	-0.305505	0.262327
ENSG00000033050	ABCF2	0.187962	0.637001	-0.0805228	0.822922	-1.23244	2.39866e-09	-0.558065	0.00679555	-0.384468	0.210518	-0.917605	7.1793e-06	-0.371831	0.0762596	-0.449357	0.087404	-0.944457	5.07537e-06	-0.571048	0.00632252	-0.541441	0.0295289	-0.0633819	0.755933	-0.859168	1.6114e-06	-0.309262	0.0291713	-0.0156164	0.981517	-0.828539	1.18356e-06	-0.667278	2.94667e-05
ENSG00000242159	ABCF2P1	NA	NA	-0.173277	0.870045	NA	NA	NA	NA	NA	NA	NA	NA	NA	NA	NA	NA	NA	NA	NA	NA	NA	NA	-0.195451	0.710654	-0.865131	0.0161007	-0.450286	0.238741	0.0286415	0.988598	-0.993563	0.00485213	-0.784733	0.0247081
ENSG00000161204	ABCF3	0.0935078	0.84864	-0.0892982	0.811978	0.32561	0.127304	0.92872	5.67395e-06	-0.254795	0.453764	0.449625	0.0323173	0.908106	8.57505e-06	-0.291978	0.299585	0.636739	0.00223793	0.932216	7.44438e-06	-0.0566053	0.869635	0.018998	0.940557	0.20693	0.140379	-0.222486	0.141145	0.10624	0.694562	0.339277	0.0110127	-0.344699	0.0131435
ENSG00000160179	ABCG1	NA	NA	-0.280479	0.70859	7.55705	2.9784e-10	7.51665	3.35446e-10	NA	NA	8.66373	6.15159e-11	8.77772	4.45834e-11	NA	NA	7.28229	6.10369e-11	6.78181	1.96059e-10	NA	NA	0.69094	0.111996	0.862978	0.0118623	1.62477	0.000127746	-0.316145	0.588743	0.647397	0.036937	0.55425	0.0848575
ENSG00000118777	ABCG2	NA	NA	NA	NA	10.1946	3.35475e-10	9.73599	1.21264e-09	NA	NA	7.04877	4.86288e-10	6.73196	1.14332e-09	NA	NA	4.65144	8.25864e-09	4.02936	7.84449e-08	NA	NA	1.63217	0.0115273	3.20643	3.37828e-06	NA	NA	3.13683	1.62957e-05	4.46367	2.84482e-08	NA	NA
ENSG00000172350	ABCG4	-1.7101	0.000169989	NA	NA	3.49507	1.51669e-11	3.46458	1.59881e-11	-1.14656	0.0274016	4.91051	2.05711e-13	4.96463	1.36968e-13	NA	NA	3.32695	7.7682e-11	3.05817	3.5039e-10	0.56688	0.203745	1.75015	0.00100727	4.56729	2.30023e-09	NA	NA	2.61765	5.46306e-06	4.67056	5.00346e-10	NA	NA
ENSG00000143994	ABHD1	NA	NA	NA	NA	2.07404	0.00203024	1.99925	0.00243236	NA	NA	NA	NA	NA	NA	NA	NA	NA	NA	NA	NA	NA	NA	NA	NA	NA	NA	NA	NA	NA	NA	NA	NA	NA	NA
ENSG00000144827	ABHD10	0.342846	0.348903	0.22081	0.890806	1.88793	9.86303e-13	1.56445	2.83073e-11	-0.277435	0.463539	0.863669	0.000144616	0.844059	0.000186864	-0.741691	0.00840793	0.889657	9.57158e-05	0.933961	4.46281e-05	-0.3816	0.194235	-0.499846	0.496355	1.2636	0.013064	-1.25429	0.0214254	-0.0327536	0.990044	0.643779	0.163924	-1.62129	0.00297836
ENSG00000106077	ABHD11	0.780088	0.0110586	-0.0684578	0.982556	0.026545	0.928394	0.0791805	0.784075	-0.306757	0.466297	-0.406704	0.124716	-0.251846	0.350863	-0.813243	0.00897985	-0.473046	0.0718942	-0.483017	0.0668286	-0.603796	0.0526842	-0.448012	0.496076	-0.887171	0.0497689	-1.10065	0.0277829	-0.58752	0.382199	0.228872	0.59414	-0.288502	0.535051
ENSG00000100997	ABHD12	0.738007	0.00181466	-0.307991	0.673907	0.152377	0.497184	0.280795	0.189654	-0.39966	0.191232	-0.174731	0.432297	-0.212212	0.328167	-0.360953	0.182292	-0.152121	0.501329	-0.151483	0.508602	-0.149086	0.618667	0.101233	0.853301	0.155554	0.66198	-0.507435	0.177534	-0.00709066	0.998071	0.377441	0.2175	-0.0184623	0.962917
ENSG00000131969	ABHD12B	NA	NA	NA	NA	NA	NA	NA	NA	NA	NA	NA	NA	NA	NA	NA	NA	NA	NA	NA	NA	NA	NA	3.26937	3.91434e-05	NA	NA	NA	NA	NA	NA	NA	NA	NA	NA
ENSG00000139826	ABHD13	0.0840594	0.879864	-0.0541636	0.977328	0.103679	0.685298	0.371933	0.116	0.0568944	0.907336	0.249791	0.307149	0.459421	0.0488361	0.103071	0.781318	0.115446	0.653231	0.220848	0.375255	-0.0572124	0.882807	-0.417335	0.363464	0.70938	0.0283177	-0.147338	0.708354	-0.235162	0.71617	0.167914	0.597274	-0.532317	0.0898963
ENSG00000248487	ABHD14A	0.107988	0.87457	-0.409842	0.789721	-0.847303	0.00409117	-1.04171	0.000375383	0.265671	0.594075	-0.693995	0.0206406	-0.853953	0.0037575	0.265469	0.519149	-0.542728	0.0734669	-0.853002	0.00414184	0.246805	0.547827	0.218789	0.814128	-1.08819	0.0668382	-0.282485	0.702859	-0.266579	0.882528	-0.119172	0.841338	0.283694	0.645559
ENSG00000114786	ABHD14A-ACY1	0.121783	0.821929	0.00703382	0.998094	-1.21795	4.60603e-07	-1.12551	1.86907e-06	0.121586	0.792537	-0.83465	0.000386728	-0.719668	0.00214808	0.322456	0.315143	-0.665606	0.0050967	-0.577032	0.01597	0.432146	0.146581	0.0998313	0.856516	-1.0917	0.00261737	-0.193512	0.643355	0.0398029	0.982283	-0.161899	0.620984	0.188349	0.595457
ENSG00000114779	ABHD14B	-0.473858	0.113325	-0.309138	0.727655	-0.692521	0.00193017	-0.930814	0.000101581	0.663031	0.038151	-0.324894	0.153686	-0.620553	0.00541313	0.894396	0.00238431	-0.0894912	0.716126	-0.19385	0.416189	0.885706	0.00172114	0.708659	0.152064	-0.589966	0.116029	0.793668	0.0552511	0.318712	0.659001	0.0276963	0.943011	1.05098	0.00568965
ENSG00000168792	ABHD15	-0.129791	0.809884	-0.248674	0.541924	-0.061047	0.818246	0.228592	0.357675	0.112716	0.809716	0.0847723	0.748706	0.350081	0.147683	-0.00757033	0.987739	0.431484	0.0751348	0.555126	0.0205904	0.347144	0.25992	-0.0691531	0.855926	0.941748	0.000276964	0.581892	0.0187924	0.0163459	0.989301	0.583521	0.00821773	0.861385	0.000451724
ENSG00000204427	ABHD16A	-0.206128	0.624744	-0.061698	0.940507	-0.411983	0.0658664	0.146911	0.538047	-0.025485	0.958197	-0.238497	0.305415	0.249017	0.2786	0.0832763	0.819437	-0.297253	0.196417	-0.00853334	0.973482	0.0568462	0.87762	-0.189127	0.51023	-0.237901	0.226073	-0.0654528	0.793849	-0.153696	0.684442	-0.0364284	0.854736	-0.141487	0.473575
ENSG00000129968	ABHD17A	NA	NA	-0.0529005	0.987213	NA	NA	NA	NA	NA	NA	NA	NA	NA	NA	NA	NA	NA	NA	NA	NA	NA	NA	0.40676	0.496242	0.780132	0.0564345	0.213869	0.675291	0.120978	0.937205	1.5521	0.000217812	0.553334	0.161212
ENSG00000250536	ABHD17AP3	NA	NA	NA	NA	NA	NA	NA	NA	NA	NA	NA	NA	NA	NA	NA	NA	NA	NA	NA	NA	NA	NA	NA	NA	0.994797	0.197123	NA	NA	NA	NA	1.80283	0.0116965	NA	NA
ENSG00000107362	ABHD17B	NA	NA	0.0826604	0.968136	NA	NA	NA	NA	NA	NA	NA	NA	NA	NA	NA	NA	NA	NA	NA	NA	NA	NA	-0.349931	0.562044	0.81863	0.0437517	0.177224	0.725742	0.0830499	0.960829	0.291649	0.457672	-0.0770044	0.867597
ENSG00000136379	ABHD17C	NA	NA	0.718608	0.392758	NA	NA	NA	NA	NA	NA	NA	NA	NA	NA	NA	NA	NA	NA	NA	NA	NA	NA	-0.310904	0.70616	-0.0418803	0.945129	1.42723	0.0168052	0.225695	0.895865	-0.6077	0.254657	0.804342	0.127512
ENSG00000164074	ABHD18	NA	NA	-0.412884	0.274853	NA	NA	NA	NA	NA	NA	NA	NA	NA	NA	NA	NA	NA	NA	NA	NA	NA	NA	-0.0651467	0.879684	0.21339	0.415042	0.24882	0.405757	0.170976	0.772099	-0.347826	0.15416	0.603158	0.0187436
ENSG00000140526	ABHD2	-0.308362	0.457941	-0.0881526	0.987929	-0.743798	0.00402541	0.0937598	0.722491	-0.249459	0.54892	-0.28863	0.253167	0.214851	0.393391	-0.145034	0.694891	-0.51024	0.0429514	0.0320846	0.909107	-0.0959964	0.799667	-0.656143	0.533952	0.942969	0.184992	0.082446	0.933521	-0.130485	0.96755	0.396508	0.567273	-0.136031	0.866129
ENSG00000158201	ABHD3	0.48643	0.203087	-0.670069	0.176696	2.3999	3.31658e-10	2.76715	1.98347e-11	-0.0568425	0.922358	1.71604	1.00714e-07	2.05984	3.24904e-09	-0.452511	0.190999	0.557681	0.0364082	0.580634	0.0295746	-0.368267	0.282489	0.143884	0.806533	0.816917	0.0281461	-1.16417	0.00542752	-0.344189	0.590716	0.26268	0.454987	-1.46006	0.000509033
ENSG00000100439	ABHD4	-0.498613	0.073733	-0.724929	0.0432529	-0.523354	0.0137991	-0.467582	0.0282985	0.466188	0.128532	0.0506009	0.834939	-0.0738057	0.755363	0.61014	0.0198502	0.588836	0.00579763	0.624731	0.00344606	0.757448	0.00395153	0.262669	0.523194	-0.0808033	0.789963	1.88008	3.79671e-06	0.188257	0.755712	-0.27897	0.284968	1.22075	0.000110588
ENSG00000011198	ABHD5	0.195391	0.667205	0.521587	0.0153263	0.416968	0.0744574	0.176323	0.474153	0.23314	0.551994	0.453614	0.0522023	0.211179	0.383614	-0.244071	0.453896	-0.906659	6.86725e-05	-0.763931	0.000844681	-0.727467	0.00704749	-0.017015	0.959348	-0.453778	0.0133662	1.26842	1.26375e-06	0.0924471	0.846409	-0.192724	0.261122	1.16293	1.36209e-06
ENSG00000163686	ABHD6	0.0387412	0.955489	-0.0237772	0.987213	1.4954	2.90536e-09	1.47249	5.07455e-09	0.00972562	0.987093	1.52918	1.45557e-09	1.50202	2.61547e-09	-0.158353	0.680463	1.41668	2.53361e-08	1.44055	1.58098e-08	0.040417	0.926021	0.283519	0.257297	1.18419	1.78969e-06	0.0127419	0.961561	0.26159	0.301355	1.28326	1.45959e-07	-0.302679	0.0918512
ENSG00000127220	ABHD8	-0.546349	0.15425	-0.112146	0.940507	-0.182937	0.547376	-0.176281	0.560257	-0.35778	0.418422	0.330876	0.265135	0.551435	0.0521627	0.0857903	0.854386	0.660905	0.0207822	0.905364	0.00133815	0.0827006	0.857319	0.967005	0.0264758	0.926662	0.00954614	0.897187	0.0191968	0.91686	0.0234975	1.54466	4.08054e-05	1.10861	0.00201936
ENSG00000136754	ABI1	-0.0431076	0.937095	0.036936	0.990363	-0.630586	0.00243802	-0.674901	0.00111075	0.244084	0.482184	-0.456431	0.0311145	-0.631584	0.00226864	0.524309	0.0454704	-0.285781	0.191691	-0.421552	0.0495909	0.238547	0.39976	-0.387063	0.462919	-0.81119	0.025729	0.433662	0.273427	-0.113234	0.931439	-1.08341	0.00333658	0.0666837	0.869129
ENSG00000138443	ABI2	-0.150738	0.727177	-0.109154	0.877707	0.258519	0.232247	0.182893	0.405839	0.255387	0.448898	0.236814	0.277415	0.128869	0.564199	0.297418	0.28662	0.036575	0.878993	0.0343691	0.889356	0.10439	0.743309	0.00997555	0.982102	0.392043	0.0878801	-0.0685889	0.814614	0.149929	0.759959	0.305072	0.162239	-0.0817482	0.74119
ENSG00000108798	ABI3	NA	NA	1.9697	0.00557002	7.0249	5.18437e-08	6.11987	8.04588e-07	NA	NA	4.57178	2.92797e-06	4.30173	7.44682e-06	NA	NA	4.77764	1.4097e-05	NA	NA	NA	NA	-0.367941	0.64135	-0.43982	0.412453	-1.20884	0.0410041	NA	NA	1.58699	0.00500038	NA	NA
ENSG00000154175	ABI3BP	0.648824	0.035627	-2.11724	0.0776636	-0.0026927	0.991778	-0.316542	0.189082	0.404803	0.250969	0.0435203	0.866947	-0.405424	0.0912943	0.733709	0.0169734	0.0732648	0.779295	0.094081	0.718295	0.214165	0.50669	-0.856331	0.521918	0.587609	0.520376	-0.301841	0.792734	-0.173112	0.964532	-0.85755	0.313632	-0.306046	0.749047
ENSG00000097007	ABL1	-0.0152292	0.980864	0.150801	0.689159	-0.805714	0.000335357	-1.00379	2.26876e-05	-0.0655478	0.877275	-0.769256	0.000557225	-1.08523	7.54867e-06	-0.0304017	0.935825	-1.48193	1.03162e-07	-1.66125	1.6852e-08	-0.745798	0.00406452	0.0562953	0.848455	-0.754648	0.00020062	0.484372	0.0118351	0.13377	0.701491	-0.890193	2.34476e-05	0.387746	0.0250511
ENSG00000143322	ABL2	0.790927	0.000764978	0.317009	0.307857	0.375201	0.0780997	-0.0450253	0.848578	-0.230093	0.511015	0.343646	0.109366	-0.133627	0.55178	-0.122134	0.703231	0.655872	0.00169596	0.216915	0.334249	-0.29823	0.272128	-0.312364	0.264412	-1.14206	1.07182e-05	0.356323	0.123437	-0.184123	0.651285	-1.08113	9.21514e-06	0.619026	0.00392044
ENSG00000099204	ABLIM1	0.695248	0.0458388	0.126221	0.960081	1.92093	8.61354e-08	1.10892	0.000183442	0.800375	0.042826	1.71342	5.30433e-07	0.825102	0.00311376	0.149453	0.703673	1.19322	9.55967e-05	0.731716	0.00932338	0.592361	0.073734	0.791393	0.251903	1.5029	0.00448321	2.09061	0.00058706	1.17592	0.0444503	1.77045	0.000581876	2.29634	8.12909e-05
ENSG00000163995	ABLIM2	NA	NA	-3.61508	3.62501e-07	9.15674	6.41024e-15	8.74223	1.99033e-14	NA	NA	9.78574	1.04698e-14	9.65203	1.42559e-14	NA	NA	5.57159	6.32129e-13	5.16506	2.27396e-12	1.12074	0.0295638	3.18407	6.01116e-07	4.93839	5.5439e-10	3.75777	4.39804e-08	1.41877	0.000701683	1.99227	2.90745e-06	2.18328	3.22303e-06
ENSG00000173210	ABLIM3	0.00342202	0.996075	-0.502825	0.567347	1.51821	2.67418e-07	1.39211	1.29906e-06	0.694194	0.0441692	1.80474	1.68159e-08	1.49822	4.08209e-07	0.924239	0.00319477	1.1246	2.74807e-05	1.1439	2.36766e-05	1.09842	0.00046045	-0.0720818	0.930414	0.40088	0.396325	-0.703786	0.17551	0.0226755	0.993597	0.073059	0.878622	-0.973733	0.0388991
ENSG00000175164	ABO	NA	NA	NA	NA	NA	NA	NA	NA	NA	NA	NA	NA	NA	NA	NA	NA	NA	NA	NA	NA	0.927384	0.289918	NA	NA	NA	NA	NA	NA	NA	NA	NA	NA	NA	NA
ENSG00000002726	ABP1	NA	NA	NA	NA	NA	NA	NA	NA	NA	NA	NA	NA	NA	NA	NA	NA	9.5325	7.92345e-07	9.35042	1.10968e-06	NA	NA	NA	NA	NA	NA	NA	NA	NA	NA	NA	NA	NA	NA
ENSG00000159842	ABR	-0.26195	0.456912	0.195568	0.523931	-0.731202	0.000377103	-0.758404	0.000217358	0.168674	0.65055	-0.341747	0.110008	-0.377763	0.0728205	0.31371	0.259019	-1.05699	3.98689e-07	-1.31486	1.26225e-08	-0.071391	0.830251	-0.0915832	0.742873	0.0299228	0.88208	0.405852	0.0344103	-0.0338058	0.964962	0.0346892	0.85538	0.175897	0.323466
ENSG00000146386	ABRACL	0.655753	0.0663968	0.63722	0.0854777	-0.799222	0.00521673	-1.57045	2.79626e-06	-0.0426284	0.943239	-1.41686	1.14337e-05	-2.21747	1.10247e-08	-0.391147	0.29018	-1.06274	0.00041967	-1.13482	0.000212258	-0.220625	0.57801	0.214084	0.616245	-1.91938	1.53672e-06	-0.137986	0.703829	-0.171058	0.81195	-1.20327	0.000121281	-0.135882	0.656129
ENSG00000163322	ABRAXAS1	NA	NA	0.233847	0.587634	NA	NA	NA	NA	NA	NA	NA	NA	NA	NA	NA	NA	NA	NA	NA	NA	NA	NA	-0.486776	0.114346	0.0981923	0.69438	1.27646	3.17129e-05	-0.382676	0.218285	-0.340269	0.133127	0.857222	0.000685379
ENSG00000165660	ABRAXAS2	NA	NA	-0.080553	0.904569	NA	NA	NA	NA	NA	NA	NA	NA	NA	NA	NA	NA	NA	NA	NA	NA	NA	NA	-0.303412	0.280081	-0.291223	0.148946	0.0721307	0.775777	-0.118393	0.803833	-0.649204	0.00198448	-0.179754	0.373911
ENSG00000146109	ABT1	0.357891	0.34573	0.286262	0.459631	-0.636276	0.00810179	-0.319212	0.198611	-0.373332	0.311634	-0.557698	0.0212227	-0.369976	0.131205	-0.489227	0.110862	-0.820147	0.000590364	-0.658717	0.00618181	-0.571033	0.0486373	-0.0422292	0.91557	-0.407405	0.079519	-0.0917013	0.760562	-0.119512	0.854817	-0.16733	0.4437	-0.158375	0.504361
ENSG00000114626	ABTB1	-0.964034	0.000649303	0.127458	0.867497	0.16508	0.483053	-0.231251	0.312645	0.589418	0.0648602	1.07397	1.85085e-05	0.688126	0.00290917	1.8563	7.40034e-07	1.62622	4.39482e-08	1.42811	3.8629e-07	2.3922	1.74432e-08	0.693628	0.0257843	0.627222	0.0129355	2.28525	9.03422e-08	0.679426	0.0169123	0.365948	0.111938	2.39211	2.04956e-08
ENSG00000166016	ABTB2	-1.07518	0.0247427	0.706732	0.424164	3.64762	2.04104e-10	3.74452	1.51344e-10	0.444714	0.437249	4.92483	2.48295e-12	5.11669	1.34381e-12	-0.0984754	0.873291	2.14345	1.07753e-06	2.05723	2.24093e-06	-0.878293	0.0469503	0.043461	0.966508	1.59247	0.00690407	0.768694	0.211075	-0.34004	0.799806	1.79118	0.00154491	0.35856	0.533322
ENSG00000225007	AC000067.1	-0.287087	0.820562	NA	NA	-4.46599	2.28587e-05	-4.17859	1.81621e-05	-0.330866	0.7566	-1.70626	0.0185625	-3.77665	8.3303e-05	0.331333	0.689407	NA	NA	NA	NA	NA	NA	NA	NA	NA	NA	NA	NA	NA	NA	NA	NA	NA	NA
ENSG00000185065	AC000068.5	0.252942	0.834578	NA	NA	-0.43919	0.46896	-1.7166	0.00680934	-0.180825	0.868039	-1.70222	0.00785733	-2.28265	0.000712539	-1.00057	0.162234	NA	NA	NA	NA	NA	NA	NA	NA	NA	NA	NA	NA	NA	NA	NA	NA	NA	NA
ENSG00000235776	AC000089.3	NA	NA	NA	NA	NA	NA	NA	NA	NA	NA	NA	NA	NA	NA	0.468655	0.403972	-0.114498	0.773283	-0.0220489	0.956436	0.35494	0.433839	NA	NA	NA	NA	NA	NA	NA	NA	NA	NA	NA	NA
ENSG00000243107	AC000120.7	0.101528	0.904843	NA	NA	-0.554714	0.147539	-0.150759	0.708933	0.4111	0.459617	-0.469307	0.224294	-0.178442	0.652662	0.386078	0.410359	-0.510809	0.193368	-0.109797	0.797019	0.585423	0.189837	NA	NA	NA	NA	NA	NA	NA	NA	NA	NA	NA	NA
ENSG00000213683	AC002056.3	1.061	0.142954	NA	NA	NA	NA	NA	NA	NA	NA	-0.508466	0.342312	-0.541683	0.296934	-1.82997	0.00992439	-1.42107	0.00828929	-1.12749	0.0283514	-2.21356	0.00140444	NA	NA	NA	NA	NA	NA	NA	NA	NA	NA	NA	NA
ENSG00000237813	AC002066.1	NA	NA	NA	NA	4.35953	1.4838e-08	3.46147	8.35213e-07	NA	NA	4.12455	1.34833e-08	3.15691	1.04956e-06	NA	NA	3.5077	7.13596e-08	3.32298	1.70442e-07	0.795227	0.191292	NA	NA	NA	NA	NA	NA	NA	NA	NA	NA	NA	NA
ENSG00000234695	AC002076.10	NA	NA	NA	NA	4.67138	4.37051e-05	NA	NA	NA	NA	NA	NA	NA	NA	NA	NA	NA	NA	NA	NA	NA	NA	NA	NA	NA	NA	NA	NA	NA	NA	NA	NA	NA	NA
ENSG00000248101	AC002116.8	0.374468	0.412316	NA	NA	-0.703131	0.0136209	-0.124303	0.691511	-0.177337	0.736329	-0.740384	0.00970937	-0.262168	0.38094	-0.29828	0.443941	-0.748734	0.00933939	-0.32331	0.285353	-0.205862	0.612804	NA	NA	NA	NA	NA	NA	NA	NA	NA	NA	NA	NA
ENSG00000224505	AC002117.1	NA	NA	NA	NA	NA	NA	NA	NA	1.13538	0.0482588	NA	NA	NA	NA	2.0508	0.000193884	NA	NA	NA	NA	1.91372	0.000378475	NA	NA	NA	NA	NA	NA	NA	NA	NA	NA	NA	NA
ENSG00000235560	AC002310.12	0.166453	0.858259	NA	NA	1.17676	0.00371836	0.946872	0.0183671	0.144902	0.855209	-0.091627	0.847995	0.1901	0.67126	-0.179288	0.770733	0.784489	0.0657802	0.618276	0.147876	0.421078	0.4299	NA	NA	NA	NA	NA	NA	NA	NA	NA	NA	NA	NA
ENSG00000260869	AC002310.13	0.138244	0.888661	NA	NA	-1.46197	0.00346732	-1.97227	0.000232554	-0.593584	0.391816	-2.29939	6.43272e-05	-2.6656	9.22417e-06	-0.917195	0.104505	-1.32312	0.00642275	-1.55375	0.00167978	-0.300175	0.620194	NA	NA	NA	NA	NA	NA	NA	NA	NA	NA	NA	NA
ENSG00000188223	AC002398.9	-0.131555	0.806435	NA	NA	-0.899491	0.000114835	-0.230589	0.353022	-0.474287	0.168213	-0.351749	0.150356	0.103451	0.689341	-0.184956	0.598563	0.00696758	0.979753	0.377079	0.123153	-0.122624	0.735148	NA	NA	NA	NA	NA	NA	NA	NA	NA	NA	NA	NA
ENSG00000237819	AC002454.1	0.88632	0.257169	NA	NA	NA	NA	NA	NA	0.709306	0.393071	-1.20768	0.0366479	-1.89878	0.00204334	0.480812	0.477016	NA	NA	NA	NA	NA	NA	NA	NA	NA	NA	NA	NA	NA	NA	NA	NA	NA	NA
ENSG00000223969	AC002456.2	NA	NA	NA	NA	3.11641	2.41485e-05	2.75926	0.000114379	NA	NA	1.96478	0.00157161	1.37634	0.0223486	NA	NA	4.17167	2.8546e-06	3.88466	8.71645e-06	NA	NA	NA	NA	NA	NA	NA	NA	NA	NA	NA	NA	NA	NA
ENSG00000241764	AC002467.7	0.164602	0.839084	NA	NA	-0.136287	0.742014	-0.503286	0.187034	-0.188522	0.780542	-0.258509	0.51984	-0.464287	0.224013	-0.221311	0.670207	0.559591	0.140375	0.00737853	0.986215	-0.346818	0.479606	NA	NA	NA	NA	NA	NA	NA	NA	NA	NA	NA	NA
ENSG00000268193	AC002985.3	0.204338	0.624971	NA	NA	0.151537	0.520434	0.126619	0.595015	-0.524016	0.114424	-0.0689978	0.776857	-0.00310255	0.98984	-0.371415	0.20972	-0.0248636	0.922729	-0.0772718	0.756868	-0.205578	0.503334	NA	NA	NA	NA	NA	NA	NA	NA	NA	NA	NA	NA
ENSG00000196861	AC002994.1	0.101708	0.912538	NA	NA	-1.39346	0.00158497	-1.60175	0.000196222	0.190603	0.796857	-0.830992	0.0537045	-1.09922	0.00943693	-0.263001	0.641844	-0.700552	0.11079	-0.874851	0.0395606	0.119885	0.845095	NA	NA	NA	NA	NA	NA	NA	NA	NA	NA	NA	NA
ENSG00000268133	AC003002.4	0.0133098	0.989365	NA	NA	-1.0623	0.00294446	-0.537023	0.13517	0.0365267	0.960078	-0.805141	0.025582	-0.511811	0.155583	0.00228091	0.997579	-0.207487	0.601101	-0.102248	0.804951	0.100917	0.857977	NA	NA	NA	NA	NA	NA	NA	NA	NA	NA	NA	NA
ENSG00000269533	AC003002.6	-0.0595345	0.941053	NA	NA	-0.928112	0.0046008	-0.193481	0.58265	0.0873654	0.891045	-0.741596	0.0261268	-0.106109	0.769521	-0.0824635	0.873425	0.212709	0.555305	0.136158	0.714512	0.129231	0.798166	NA	NA	NA	NA	NA	NA	NA	NA	NA	NA	NA	NA
ENSG00000188477	AC003003.5	NA	NA	NA	NA	NA	NA	NA	NA	NA	NA	NA	NA	NA	NA	NA	NA	NA	NA	5.51348	0.000140505	NA	NA	NA	NA	NA	NA	NA	NA	NA	NA	NA	NA	NA	NA
ENSG00000268107	AC003005.4	0.13349	0.873987	NA	NA	-0.664288	0.0939107	-0.425964	0.281925	-0.275825	0.669767	-0.727607	0.0648903	-0.421264	0.288199	-0.561947	0.228972	0.228785	0.596536	0.0849337	0.851411	0.16725	0.771875	NA	NA	NA	NA	NA	NA	NA	NA	NA	NA	NA	NA
ENSG00000269026	AC003006.7	0.157771	0.826298	NA	NA	-0.463004	0.175717	-0.185035	0.605491	-0.0221747	0.974394	-0.430853	0.21168	-0.296317	0.392656	-0.137811	0.779788	-0.0730613	0.84662	-0.137286	0.71366	0.126643	0.802419	NA	NA	NA	NA	NA	NA	NA	NA	NA	NA	NA	NA
ENSG00000248594	AC003029.1	-0.160329	0.806435	NA	NA	0.329475	0.284091	0.39264	0.193463	0.0687652	0.909992	0.277785	0.37811	0.46049	0.126239	0.0831732	0.864252	0.710937	0.0174071	0.729115	0.0146346	0.253496	0.539298	NA	NA	NA	NA	NA	NA	NA	NA	NA	NA	NA	NA
ENSG00000227517	AC003051.1	4.93852	2.58918e-05	NA	NA	NA	NA	NA	NA	NA	NA	-1.43168	0.0310256	-1.92656	0.0048122	-1.10314	0.153568	NA	NA	NA	NA	NA	NA	NA	NA	NA	NA	NA	NA	NA	NA	NA	NA	NA	NA
ENSG00000237773	AC003075.4	0.279003	0.769194	NA	NA	3.73996	3.66018e-10	3.17282	7.91854e-09	NA	NA	2.9135	2.36554e-08	2.59764	1.65852e-07	0.286399	0.644672	3.55958	4.4028e-09	3.41151	9.71712e-09	NA	NA	NA	NA	NA	NA	NA	NA	NA	NA	NA	NA	NA	NA
ENSG00000236453	AC003092.1	NA	NA	NA	NA	5.95485	8.35191e-06	NA	NA	NA	NA	7.12968	1.21008e-06	7.00848	1.4688e-06	NA	NA	5.37524	8.41834e-06	4.4686	9.57869e-05	NA	NA	NA	NA	NA	NA	NA	NA	NA	NA	NA	NA	NA	NA
ENSG00000267750	AC003102.3	NA	NA	NA	NA	4.58102	2.44838e-13	4.16073	1.53941e-12	0.62823	0.316561	4.11873	1.99801e-12	3.85124	6.79391e-12	0.744358	0.148147	2.0198	9.8178e-08	1.78467	7.14459e-07	1.18044	0.00170341	NA	NA	NA	NA	NA	NA	NA	NA	NA	NA	NA	NA
ENSG00000234494	AC003665.1	-0.316993	0.618912	NA	NA	-0.889167	0.0144074	-0.282588	0.45386	0.198753	0.754823	-0.277646	0.476725	-0.0865271	0.82999	0.414877	0.364086	-0.150291	0.713114	0.0590047	0.890256	0.56021	0.204108	NA	NA	NA	NA	NA	NA	NA	NA	NA	NA	NA	NA
ENSG00000232821	AC003986.6	NA	NA	NA	NA	NA	NA	NA	NA	NA	NA	NA	NA	NA	NA	NA	NA	NA	NA	2.54719	0.00264824	NA	NA	NA	NA	NA	NA	NA	NA	NA	NA	NA	NA	NA	NA
ENSG00000230311	AC004074.3	-0.525654	0.363748	NA	NA	0.616413	0.1106	0.149009	0.72179	0.0248655	0.974724	0.658107	0.0963706	0.608678	0.120945	0.0223268	0.974213	-0.00648795	0.988132	-0.0705673	0.876377	-0.444702	0.372485	NA	NA	NA	NA	NA	NA	NA	NA	NA	NA	NA	NA
ENSG00000268533	AC004076.7	0.386239	0.552832	NA	NA	-1.10143	0.00709089	-0.0370797	0.933707	-0.118032	0.87339	-1.07005	0.00714426	-0.639007	0.105971	-0.328447	0.52062	-0.563898	0.172705	-0.597638	0.142291	-0.0490874	0.937107	NA	NA	NA	NA	NA	NA	NA	NA	NA	NA	NA	NA
ENSG00000268163	AC004076.9	-0.806282	0.0913603	NA	NA	0.0801531	0.848736	-0.0478823	0.910423	-0.00577563	0.994774	0.184876	0.668709	0.34207	0.401029	-0.172673	0.766162	-0.0294644	0.946931	-0.337771	0.415205	0.548254	0.235226	NA	NA	NA	NA	NA	NA	NA	NA	NA	NA	NA	NA
ENSG00000270079	AC004152.6	NA	NA	NA	NA	7.92813	2.35494e-05	NA	NA	NA	NA	NA	NA	NA	NA	NA	NA	NA	NA	NA	NA	NA	NA	NA	NA	NA	NA	NA	NA	NA	NA	NA	NA	NA	NA
ENSG00000267666	AC004156.3	NA	NA	NA	NA	2.83463	2.99191e-05	2.75494	4.07279e-05	NA	NA	3.21566	6.20511e-06	2.94865	1.91329e-05	NA	NA	3.26622	5.79379e-06	3.01797	1.73619e-05	NA	NA	NA	NA	NA	NA	NA	NA	NA	NA	NA	NA	NA	NA
ENSG00000261008	AC004158.2	0.393622	0.624971	NA	NA	-1.32145	0.00684227	-0.460716	0.313051	-0.579834	0.415323	-2.24472	4.98981e-05	-1.05409	0.0214507	-0.561722	0.334657	-1.03252	0.0258878	-0.85932	0.0603018	-0.0326826	0.963712	NA	NA	NA	NA	NA	NA	NA	NA	NA	NA	NA	NA
ENSG00000160828	AC004166.7	-0.0302297	0.971718	NA	NA	0.488415	0.118269	-0.0247079	0.943728	0.0739617	0.905025	0.360121	0.264207	-0.108079	0.752696	0.0147751	0.978807	-0.157861	0.646515	-0.343501	0.296327	0.0927119	0.851448	NA	NA	NA	NA	NA	NA	NA	NA	NA	NA	NA	NA
ENSG00000270143	AC004257.3	-0.527787	0.329384	NA	NA	-0.380495	0.326405	-0.740905	0.0446541	0.319557	0.585597	-0.119281	0.774983	-0.357739	0.362713	0.125145	0.826194	-0.452123	0.267316	-0.020569	0.962645	0.174021	0.756218	NA	NA	NA	NA	NA	NA	NA	NA	NA	NA	NA	NA
ENSG00000005189	AC004381.6	0.551068	0.280287	NA	NA	-3.69685	2.97619e-10	-2.60399	5.60724e-08	-0.620886	0.219596	-3.63395	3.41955e-10	-3.02273	4.70327e-09	-0.622766	0.156124	-1.8693	8.31052e-06	-2.05058	2.56212e-06	-0.234647	0.620223	NA	NA	NA	NA	NA	NA	NA	NA	NA	NA	NA	NA
ENSG00000223749	AC004383.4	0.975281	0.00979036	NA	NA	1.48565	2.69283e-06	1.29594	4.15517e-05	-0.343907	0.543096	1.39947	4.75089e-06	0.964066	0.00165479	-0.242632	0.593958	2.18489	1.38507e-10	2.48538	1.50681e-11	1.04847	0.00250331	NA	NA	NA	NA	NA	NA	NA	NA	NA	NA	NA	NA
ENSG00000146677	AC004453.8	0.262465	0.689026	NA	NA	-0.0372226	0.925743	-0.0408856	0.918178	-0.0605729	0.932962	-0.190985	0.616245	-0.254348	0.490202	0.0317061	0.956794	0.133505	0.733858	0.0784163	0.84727	-0.117368	0.828301	NA	NA	NA	NA	NA	NA	NA	NA	NA	NA	NA	NA
ENSG00000260924	AC004463.6	0.768085	0.114399	NA	NA	-1.51401	0.000288321	-0.822043	0.0401148	-0.930625	0.0815885	-1.52311	0.000122892	-0.959124	0.0135586	-1.08876	0.012331	-1.38893	0.00207067	-0.493603	0.266965	-0.393417	0.47893	NA	NA	NA	NA	NA	NA	NA	NA	NA	NA	NA	NA
ENSG00000268069	AC004466.1	NA	NA	NA	NA	3.04025	2.73136e-07	3.17154	1.26151e-07	1.28597	0.0765362	2.98097	9.91685e-07	3.17695	2.95142e-07	NA	NA	3.50654	2.99102e-08	3.33193	6.86034e-08	1.05608	0.0851205	NA	NA	NA	NA	NA	NA	NA	NA	NA	NA	NA	NA
ENSG00000258953	AC004507.1	-0.119009	0.876437	NA	NA	1.34797	3.9006e-05	0.898498	0.00639982	0.102499	0.875074	1.10398	0.000897978	0.590999	0.0813266	0.137919	0.787088	1.18827	0.000344336	0.888112	0.00796386	0.20351	0.674982	NA	NA	NA	NA	NA	NA	NA	NA	NA	NA	NA	NA
ENSG00000166770	AC004696.2	-0.369023	0.34522	NA	NA	0.0919869	0.73795	0.681401	0.00544075	0.567404	0.104544	1.09186	7.4969e-06	1.19849	8.86097e-07	0.650943	0.0326606	0.930108	0.000150273	1.22962	6.38523e-07	0.519566	0.0882371	NA	NA	NA	NA	NA	NA	NA	NA	NA	NA	NA	NA
ENSG00000256806	AC004706.1	-0.754179	0.0915621	NA	NA	-0.256066	0.500374	-0.54847	0.126583	0.571925	0.24257	0.138	0.731119	0.136141	0.73047	0.660088	0.120706	1.27774	0.000441336	1.08058	0.00313808	1.4739	0.000285065	NA	NA	NA	NA	NA	NA	NA	NA	NA	NA	NA	NA
ENSG00000229944	AC004797.1	0.207671	0.72345	NA	NA	-0.124665	0.69644	-0.0951353	0.767488	-0.711959	0.0768334	-0.37427	0.217194	-0.390943	0.19063	-0.904789	0.00864881	-0.905923	0.001848	-0.674827	0.0216243	-1.05328	0.00171041	NA	NA	NA	NA	NA	NA	NA	NA	NA	NA	NA	NA
ENSG00000175873	AC004840.9	-0.260407	0.657387	NA	NA	0.885805	0.00415539	0.899996	0.00346653	0.346522	0.482155	0.600379	0.0602833	0.689833	0.0279942	0.100412	0.841147	-0.0468925	0.899347	0.119042	0.741998	0.255302	0.561246	NA	NA	NA	NA	NA	NA	NA	NA	NA	NA	NA	NA
ENSG00000242687	AC004893.11	-0.48008	0.360348	NA	NA	0.907715	0.00722437	0.957192	0.00420383	0.51352	0.295741	1.02641	0.00277949	1.26247	0.000176991	0.684626	0.0967406	0.510122	0.149212	0.366027	0.313718	0.640792	0.119133	NA	NA	NA	NA	NA	NA	NA	NA	NA	NA	NA	NA
ENSG00000177820	AC004917.1	-0.206092	0.801772	NA	NA	-0.841733	0.0304869	-1.67468	0.000120706	-0.495828	0.406762	-1.00111	0.0127187	-1.13212	0.00487741	-0.25333	0.64548	-0.787695	0.0394731	-1.19021	0.00295458	-0.759174	0.105309	NA	NA	NA	NA	NA	NA	NA	NA	NA	NA	NA	NA
ENSG00000239556	AC004951.5	0.00773563	0.994307	NA	NA	0.780207	0.0372959	1.31125	0.0002738	0.469289	0.403124	0.600049	0.117099	1.22926	0.000675092	0.461063	0.327405	1.9666	4.10865e-07	1.89477	9.39651e-07	1.08065	0.0159614	NA	NA	NA	NA	NA	NA	NA	NA	NA	NA	NA	NA
ENSG00000228434	AC004951.6	NA	NA	NA	NA	1.58291	0.000440999	1.63811	0.000253274	NA	NA	1.31353	0.0026055	1.63583	0.000219636	NA	NA	1.21072	0.00690784	1.47108	0.00101303	NA	NA	NA	NA	NA	NA	NA	NA	NA	NA	NA	NA	NA	NA
ENSG00000243554	AC004967.7	-0.132629	0.867013	NA	NA	-0.785013	0.0318272	-0.865948	0.0159157	-0.523555	0.312894	-0.437414	0.248391	-0.476207	0.198956	-0.353871	0.452585	-0.747823	0.0488283	-0.722205	0.0563477	0.0899685	0.877255	NA	NA	NA	NA	NA	NA	NA	NA	NA	NA	NA	NA
ENSG00000183444	AC004967.8	0.125583	0.859516	NA	NA	-0.411453	0.200283	-0.419883	0.188114	-0.00168469	0.997415	-0.430335	0.182645	-0.402521	0.209299	-0.0194809	0.972026	-0.656012	0.0402219	-0.565522	0.0792572	0.420712	0.291322	NA	NA	NA	NA	NA	NA	NA	NA	NA	NA	NA	NA
ENSG00000205485	AC004980.7	0.364616	0.567723	NA	NA	0.583658	0.122089	0.640045	0.0836801	0.419331	0.460796	0.355341	0.35725	0.24564	0.52695	0.0081016	0.9912	0.692546	0.0586471	0.499365	0.183265	-0.620247	0.163538	NA	NA	NA	NA	NA	NA	NA	NA	NA	NA	NA	NA
ENSG00000241057	AC004985.12	-0.116873	0.90682	NA	NA	0.729815	0.0763057	1.19582	0.00438543	0.735219	0.227463	0.525918	0.212813	0.910329	0.028065	0.111631	0.871453	1.56475	0.000437037	1.28578	0.002854	0.921499	0.0768015	NA	NA	NA	NA	NA	NA	NA	NA	NA	NA	NA	NA
ENSG00000233225	AC004987.9	-0.0578314	0.956984	NA	NA	1.32047	0.000732725	1.61339	2.52015e-05	0.156254	0.839324	1.17334	0.0029064	1.35392	0.00047922	0.553035	0.268106	1.00164	0.0140005	1.31056	0.000973808	-0.110068	0.867775	NA	NA	NA	NA	NA	NA	NA	NA	NA	NA	NA	NA
ENSG00000213888	AC005003.1	0.280871	0.658285	NA	NA	0.0855568	0.82453	-0.0692605	0.857455	0.215089	0.723706	-0.534564	0.133307	-0.598155	0.0860241	-0.189737	0.697278	-0.186898	0.649299	-0.519991	0.181931	0.519159	0.257454	NA	NA	NA	NA	NA	NA	NA	NA	NA	NA	NA	NA
ENSG00000227331	AC005042.2	NA	NA	NA	NA	NA	NA	NA	NA	NA	NA	NA	NA	NA	NA	NA	NA	1.25185	0.0270182	NA	NA	NA	NA	NA	NA	NA	NA	NA	NA	NA	NA	NA	NA	NA	NA
ENSG00000224046	AC005076.5	NA	NA	NA	NA	NA	NA	1.10157	0.027453	0.715371	0.360875	NA	NA	NA	NA	NA	NA	1.56175	0.0023579	1.58925	0.00194053	0.272422	0.714139	NA	NA	NA	NA	NA	NA	NA	NA	NA	NA	NA	NA
ENSG00000227038	AC005077.12	NA	NA	NA	NA	NA	NA	NA	NA	NA	NA	NA	NA	NA	NA	NA	NA	NA	NA	1.42493	0.0574774	NA	NA	NA	NA	NA	NA	NA	NA	NA	NA	NA	NA	NA	NA
ENSG00000230882	AC005077.14	NA	NA	NA	NA	NA	NA	NA	NA	NA	NA	0.938413	0.0955794	NA	NA	NA	NA	2.69074	8.45854e-05	1.86424	0.00386397	NA	NA	NA	NA	NA	NA	NA	NA	NA	NA	NA	NA	NA	NA
ENSG00000248431	AC005150.1	NA	NA	NA	NA	7.81423	2.21137e-08	7.42665	5.56305e-08	NA	NA	11.5763	1.28823e-09	10.6225	6.89803e-09	NA	NA	8.1358	1.70697e-08	6.76016	4.77689e-07	NA	NA	NA	NA	NA	NA	NA	NA	NA	NA	NA	NA	NA	NA
ENSG00000234899	AC005152.2	NA	NA	NA	NA	7.52888	1.22704e-08	7.05905	4.18341e-08	NA	NA	NA	NA	NA	NA	NA	NA	NA	NA	NA	NA	NA	NA	NA	NA	NA	NA	NA	NA	NA	NA	NA	NA	NA	NA
ENSG00000236455	AC005154.5	-0.0678765	0.929657	NA	NA	0.182123	0.593955	0.0731759	0.834908	0.171592	0.76654	-0.0603403	0.866111	-0.213358	0.527807	-0.0242506	0.965493	0.0271516	0.94111	-0.198599	0.570917	0.0702511	0.892139	NA	NA	NA	NA	NA	NA	NA	NA	NA	NA	NA	NA
ENSG00000196295	AC005154.6	-0.309778	0.45874	NA	NA	0.281078	0.274622	0.236719	0.360819	0.542075	0.121754	0.030218	0.914473	-0.180979	0.492532	0.413954	0.200304	-0.181122	0.499075	-0.306451	0.239626	0.434434	0.163161	NA	NA	NA	NA	NA	NA	NA	NA	NA	NA	NA	NA
ENSG00000244480	AC005154.7	NA	NA	NA	NA	0.84095	0.0606328	0.544478	0.223707	0.829299	0.197857	NA	NA	NA	NA	NA	NA	NA	NA	NA	NA	1.14897	0.0561498	NA	NA	NA	NA	NA	NA	NA	NA	NA	NA	NA	NA
ENSG00000234133	AC005154.9	NA	NA	NA	NA	NA	NA	1.16486	0.00807882	1.23256	0.0343696	NA	NA	NA	NA	NA	NA	NA	NA	0.649238	0.209815	1.00525	0.0775128	NA	NA	NA	NA	NA	NA	NA	NA	NA	NA	NA	NA
ENSG00000231595	AC005224.2	0.000581145	0.99937	NA	NA	-1.26831	0.0088864	-0.402634	0.388132	-0.18006	0.828359	-0.0814357	0.87099	-0.151998	0.757204	-0.068606	0.924531	-0.687614	0.131271	-0.365491	0.423556	-0.786468	0.121105	NA	NA	NA	NA	NA	NA	NA	NA	NA	NA	NA	NA
ENSG00000256210	AC005255.3	0.495883	0.339732	NA	NA	-0.691266	0.0554191	-0.611924	0.0869053	-0.667061	0.172714	-0.729403	0.0403824	-0.883512	0.0112381	-0.774769	0.0577898	-1.05917	0.0029638	-0.835962	0.0194066	-0.59632	0.165162	NA	NA	NA	NA	NA	NA	NA	NA	NA	NA	NA	NA
ENSG00000267551	AC005264.2	NA	NA	NA	NA	NA	NA	NA	NA	NA	NA	NA	NA	NA	NA	NA	NA	4.24838	8.57583e-05	NA	NA	NA	NA	NA	NA	NA	NA	NA	NA	NA	NA	NA	NA	NA	NA
ENSG00000170468	AC005280.1	0.0746542	0.905762	NA	NA	-0.512008	0.0480735	-0.437346	0.0934162	-0.515997	0.165452	-0.32537	0.223902	-0.350464	0.183886	-0.557325	0.0847929	-0.432499	0.100042	-0.682235	0.00809289	-0.308958	0.364192	NA	NA	NA	NA	NA	NA	NA	NA	NA	NA	NA	NA
ENSG00000267283	AC005306.3	-0.0832648	0.937875	NA	NA	0.0816473	0.862962	0.164436	0.720291	0.138066	0.869982	-0.532871	0.248243	-0.230675	0.615361	0.0851392	0.904507	NA	NA	0.715419	0.1572	1.13907	0.0640936	NA	NA	NA	NA	NA	NA	NA	NA	NA	NA	NA	NA
ENSG00000267243	AC005307.3	NA	NA	NA	NA	NA	NA	NA	NA	NA	NA	NA	NA	NA	NA	NA	NA	3.84704	6.95548e-07	3.25939	4.14527e-06	NA	NA	NA	NA	NA	NA	NA	NA	NA	NA	NA	NA	NA	NA
ENSG00000248015	AC005329.7	-0.438443	0.550467	NA	NA	-0.349825	0.425896	-0.105781	0.813234	-0.387953	0.581825	-0.13613	0.770861	-0.319444	0.473551	-0.207495	0.748392	1.58918	0.000728763	1.38898	0.00251499	0.688929	0.216119	NA	NA	NA	NA	NA	NA	NA	NA	NA	NA	NA	NA
ENSG00000267164	AC005336.1	NA	NA	NA	NA	NA	NA	NA	NA	NA	NA	NA	NA	8.73408	0.000160217	NA	NA	9.60447	5.08754e-07	8.15898	4.53265e-06	NA	NA	NA	NA	NA	NA	NA	NA	NA	NA	NA	NA	NA	NA
ENSG00000255513	AC005363.9	0.487023	0.343649	NA	NA	-0.43939	0.224235	-0.0490338	0.900611	-0.18376	0.771204	-0.847845	0.0148674	-0.491516	0.161075	-0.817054	0.041383	-1.15421	0.00127429	-1.17032	0.00104938	-1.13233	0.00563032	NA	NA	NA	NA	NA	NA	NA	NA	NA	NA	NA	NA
ENSG00000259114	AC005484.5	-0.991059	0.0109489	NA	NA	-0.889045	0.00903447	0.190833	0.599691	0.498725	0.302275	0.129543	0.737997	1.05589	0.00168651	0.898155	0.0224885	-0.213259	0.573267	0.596487	0.0883033	0.807475	0.0422266	NA	NA	NA	NA	NA	NA	NA	NA	NA	NA	NA	NA
ENSG00000267421	AC005498.3	NA	NA	NA	NA	NA	NA	NA	NA	NA	NA	NA	NA	NA	NA	NA	NA	1.59267	0.0265907	NA	NA	NA	NA	NA	NA	NA	NA	NA	NA	NA	NA	NA	NA	NA	NA
ENSG00000258559	AC005519.4	-0.44432	0.410065	NA	NA	0.212903	0.566345	0.250218	0.491605	0.591354	0.214965	0.52843	0.137803	0.658303	0.0566829	0.799222	0.0463641	0.103364	0.792559	0.110781	0.779457	0.669092	0.104179	NA	NA	NA	NA	NA	NA	NA	NA	NA	NA	NA	NA
ENSG00000230825	AC005532.5	NA	NA	NA	NA	NA	NA	NA	NA	NA	NA	NA	NA	NA	NA	NA	NA	1.94405	0.00770445	0.966053	0.188106	NA	NA	NA	NA	NA	NA	NA	NA	NA	NA	NA	NA	NA	NA
ENSG00000225666	AC005534.9	NA	NA	NA	NA	2.86138	9.50601e-09	2.88437	7.12092e-09	NA	NA	1.69607	0.000209859	1.77007	8.99758e-05	NA	NA	0.876883	0.0574472	0.797106	0.077416	NA	NA	NA	NA	NA	NA	NA	NA	NA	NA	NA	NA	NA	NA
ENSG00000235852	AC005540.3	0.0710148	0.950147	NA	NA	-0.646248	0.165524	-0.31813	0.489646	0.234358	0.775494	-0.0357464	0.941787	0.123894	0.79029	1.00283	0.0637897	0.124721	0.788435	-0.283249	0.528065	0.515418	0.335747	NA	NA	NA	NA	NA	NA	NA	NA	NA	NA	NA	NA
ENSG00000214167	AC005544.1	-1.88537	6.33015e-06	NA	NA	-1.89381	7.00364e-07	-2.5404	6.68473e-09	-0.186096	0.730934	-0.51318	0.100329	-1.04274	0.0013779	0.188742	0.670161	4.52273	5.12515e-09	NA	NA	NA	NA	NA	NA	NA	NA	NA	NA	NA	NA	NA	NA	NA	NA
ENSG00000229108	AC005550.4	-0.61438	0.467446	NA	NA	-1.48068	0.00946387	-2.46002	0.000137843	0.569912	0.463391	-1.24479	0.0354524	-2.39065	0.000415625	0.565301	0.409338	NA	NA	NA	NA	1.52669	0.0396697	NA	NA	NA	NA	NA	NA	NA	NA	NA	NA	NA	NA
ENSG00000214719	AC005562.1	-0.338164	0.369385	NA	NA	-1.13415	1.03084e-06	-1.20239	2.40848e-07	0.113921	0.806464	-0.955938	4.10632e-05	-0.954484	3.80645e-05	0.191034	0.584978	-0.587193	0.0127811	-0.758549	0.00121386	-0.00203012	0.995674	NA	NA	NA	NA	NA	NA	NA	NA	NA	NA	NA	NA
ENSG00000269205	AC005606.1	-0.424862	0.450004	NA	NA	-1.85267	9.39311e-06	-0.847362	0.0163392	-0.7777	0.118477	-0.893367	0.014553	-0.0537877	0.895622	-0.0103776	0.98784	-0.606126	0.109048	-0.20093	0.619289	-0.787554	0.0760403	NA	NA	NA	NA	NA	NA	NA	NA	NA	NA	NA	NA
ENSG00000269749	AC005614.5	-0.145056	0.854181	NA	NA	0.209244	0.583458	0.376242	0.298921	0.398257	0.459764	0.596291	0.0962579	0.496274	0.164859	0.363693	0.429454	0.358576	0.331838	0.281013	0.458998	-0.0219039	0.970044	NA	NA	NA	NA	NA	NA	NA	NA	NA	NA	NA	NA
ENSG00000255729	AC005618.1	0.861749	0.00185777	NA	NA	0.585581	0.0159245	0.118122	0.659191	-0.417446	0.252886	-0.0323859	0.905858	-0.313501	0.209456	-0.239732	0.486497	0.197645	0.445302	-0.165829	0.531498	-0.0188934	0.963638	NA	NA	NA	NA	NA	NA	NA	NA	NA	NA	NA	NA
ENSG00000267201	AC005624.2	-0.237322	0.818965	NA	NA	-2.28564	0.000324108	-2.26728	0.000217916	-1.17152	0.108396	-1.70242	0.0044814	-3.05654	2.60859e-05	-0.462099	0.487605	NA	NA	NA	NA	NA	NA	NA	NA	NA	NA	NA	NA	NA	NA	NA	NA	NA	NA
ENSG00000228649	AC005682.5	0.607669	0.205569	NA	NA	-0.208966	0.590808	-1.47143	0.000105828	-0.0885968	0.899065	-0.886673	0.0126287	-1.50705	5.46658e-05	-0.235302	0.629065	-0.964108	0.00543689	-1.63955	1.7685e-05	-0.253435	0.590743	NA	NA	NA	NA	NA	NA	NA	NA	NA	NA	NA	NA
ENSG00000267545	AC005779.2	-0.652373	0.321414	NA	NA	-0.99422	0.0368585	-1.4624	0.00161747	-0.811042	0.197925	NA	NA	NA	NA	NA	NA	NA	NA	NA	NA	NA	NA	NA	NA	NA	NA	NA	NA	NA	NA	NA	NA	NA	NA
ENSG00000267473	AC005789.11	0.695757	0.141086	NA	NA	0.551722	0.140315	0.903477	0.0116542	0.203068	0.758298	0.385541	0.303744	0.17811	0.644282	-0.251744	0.610892	1.29138	0.000643564	1.41996	0.0001604	0.0278231	0.966465	NA	NA	NA	NA	NA	NA	NA	NA	NA	NA	NA	NA
ENSG00000268034	AC005795.1	0.438585	0.476977	NA	NA	0.162129	0.705148	-0.157997	0.711192	-0.785529	0.144586	-0.338366	0.409143	-0.185171	0.654559	-0.60419	0.192938	-0.357405	0.394899	-0.208788	0.628697	-0.800802	0.0822747	NA	NA	NA	NA	NA	NA	NA	NA	NA	NA	NA	NA
ENSG00000205325	AC005863.1	-0.73479	0.33209	NA	NA	0.658441	0.178202	-0.920822	0.0659394	0.20113	0.827765	0.738596	0.142972	0.251504	0.629779	-0.756534	0.263253	1.80725	0.00103903	0.950973	0.0698548	NA	NA	NA	NA	NA	NA	NA	NA	NA	NA	NA	NA	NA	NA
ENSG00000238212	AC005863.2	NA	NA	NA	NA	NA	NA	NA	NA	NA	NA	NA	NA	NA	NA	NA	NA	9.87971	2.40807e-05	NA	NA	NA	NA	NA	NA	NA	NA	NA	NA	NA	NA	NA	NA	NA	NA
ENSG00000227694	AC005884.1	NA	NA	NA	NA	NA	NA	NA	NA	NA	NA	NA	NA	NA	NA	NA	NA	-0.180436	0.733543	NA	NA	0.163453	0.806987	NA	NA	NA	NA	NA	NA	NA	NA	NA	NA	NA	NA
ENSG00000253830	AC005895.3	-0.597167	0.426817	NA	NA	-3.18826	4.09439e-07	-3.699	5.74059e-08	0.0947655	0.92194	-1.90639	0.000279223	-3.14764	6.21993e-07	0.917696	0.122272	-1.36642	0.00587593	-1.87409	0.000402851	1.18797	0.0403532	NA	NA	NA	NA	NA	NA	NA	NA	NA	NA	NA	NA
ENSG00000266926	AC005943.4	0.18398	0.853793	NA	NA	NA	NA	NA	NA	NA	NA	-0.425314	0.38914	-0.723847	0.127909	-0.204713	0.75635	-1.52956	0.00194117	-1.55374	0.00103069	-1.03801	0.0513357	NA	NA	NA	NA	NA	NA	NA	NA	NA	NA	NA	NA
ENSG00000267161	AC005943.5	0.141373	0.84617	NA	NA	-1.41329	4.08121e-05	-1.4884	1.81853e-05	-0.796211	0.0720514	-1.92419	6.08226e-07	-1.98257	2.98303e-07	-0.876537	0.021675	-1.05022	0.00158715	-1.12254	0.000723031	-0.608859	0.129505	NA	NA	NA	NA	NA	NA	NA	NA	NA	NA	NA	NA
ENSG00000244563	AC006011.4	0.385557	0.432773	NA	NA	-1.34634	1.11564e-05	-0.698716	0.0229454	-0.545015	0.215086	-0.924445	0.00260971	-0.832321	0.00639501	-0.575692	0.124692	-0.910565	0.00303667	-0.961019	0.00173239	-0.536312	0.157919	NA	NA	NA	NA	NA	NA	NA	NA	NA	NA	NA	NA
ENSG00000242073	AC006014.7	-0.148664	0.858658	NA	NA	-0.570238	0.143033	-0.710301	0.0609952	-0.291248	0.639977	-0.494908	0.213805	-0.665631	0.0846019	-0.133676	0.814871	-1.19187	0.00153225	-1.15231	0.00198595	-0.575238	0.197621	NA	NA	NA	NA	NA	NA	NA	NA	NA	NA	NA	NA
ENSG00000231421	AC006050.2	NA	NA	NA	NA	8.36946	1.07764e-06	8.14526	1.68766e-06	NA	NA	8.24282	1.3929e-06	7.98177	2.07525e-06	NA	NA	NA	NA	NA	NA	NA	NA	NA	NA	NA	NA	NA	NA	NA	NA	NA	NA	NA	NA
ENSG00000267549	AC006116.17	NA	NA	NA	NA	NA	NA	NA	NA	NA	NA	NA	NA	2.01097	0.00199945	NA	NA	NA	NA	2.03736	0.00343283	NA	NA	NA	NA	NA	NA	NA	NA	NA	NA	NA	NA	NA	NA
ENSG00000267776	AC006116.24	NA	NA	NA	NA	NA	NA	NA	NA	1.55426	0.0937049	NA	NA	NA	NA	NA	NA	NA	NA	NA	NA	NA	NA	NA	NA	NA	NA	NA	NA	NA	NA	NA	NA	NA	NA
ENSG00000267459	AC006116.27	NA	NA	NA	NA	NA	NA	NA	NA	0.748647	0.3475	NA	NA	NA	NA	NA	NA	NA	NA	NA	NA	NA	NA	NA	NA	NA	NA	NA	NA	NA	NA	NA	NA	NA	NA
ENSG00000270164	AC006129.4	NA	NA	NA	NA	NA	NA	NA	NA	NA	NA	NA	NA	NA	NA	NA	NA	3.30314	0.00147454	NA	NA	NA	NA	NA	NA	NA	NA	NA	NA	NA	NA	NA	NA	NA	NA
ENSG00000267757	AC006132.1	1.22142	0.0343461	NA	NA	1.97731	4.82877e-05	1.56958	0.000721827	NA	NA	1.15603	0.0052978	1.04852	0.0101208	0.0919054	0.89174	2.02444	0.000101638	1.79385	0.000423017	NA	NA	NA	NA	NA	NA	NA	NA	NA	NA	NA	NA	NA	NA
ENSG00000254360	AC006160.8	-0.542709	0.320569	NA	NA	-0.305305	0.444065	-0.0213874	0.959854	0.189959	0.775209	-0.234192	0.575941	-0.438192	0.270186	0.38552	0.429575	-0.13941	0.749847	0.0280149	0.949857	0.839177	0.0537079	NA	NA	NA	NA	NA	NA	NA	NA	NA	NA	NA	NA
ENSG00000269729	AC006262.4	NA	NA	NA	NA	5.90159	1.06317e-09	4.34427	5.84564e-07	NA	NA	6.85435	8.62921e-10	5.86888	2.91372e-08	NA	NA	4.34618	4.76465e-09	3.92459	2.44e-08	NA	NA	NA	NA	NA	NA	NA	NA	NA	NA	NA	NA	NA	NA
ENSG00000268621	AC006262.5	NA	NA	NA	NA	NA	NA	NA	NA	NA	NA	NA	NA	NA	NA	NA	NA	4.8978	6.05094e-06	4.86802	7.16394e-06	NA	NA	NA	NA	NA	NA	NA	NA	NA	NA	NA	NA	NA	NA
ENSG00000268460	AC006262.6	NA	NA	NA	NA	8.14825	7.06649e-06	NA	NA	NA	NA	NA	NA	NA	NA	NA	NA	4.97409	1.10086e-06	4.14321	9.7334e-06	NA	NA	NA	NA	NA	NA	NA	NA	NA	NA	NA	NA	NA	NA
ENSG00000267530	AC006273.5	-0.573551	0.209724	NA	NA	-1.90897	1.64157e-06	-3.3586	3.0212e-10	0.467565	0.332915	-1.41336	0.000103932	-2.617	1.94507e-08	1.00466	0.0142423	0.301708	0.369854	-0.24888	0.471049	1.34881	0.00137525	NA	NA	NA	NA	NA	NA	NA	NA	NA	NA	NA	NA
ENSG00000266927	AC006273.7	-0.657935	0.371868	NA	NA	-1.81829	0.000773738	-2.63103	1.50121e-05	0.570229	0.425751	-0.93023	0.069048	-2.61704	3.64681e-05	0.983503	0.0977112	-0.0667971	0.910293	-0.57666	0.300697	1.06696	0.0911966	NA	NA	NA	NA	NA	NA	NA	NA	NA	NA	NA	NA
ENSG00000253392	AC006277.2	NA	NA	NA	NA	NA	NA	NA	NA	NA	NA	NA	NA	NA	NA	NA	NA	NA	NA	0.763655	0.123692	NA	NA	NA	NA	NA	NA	NA	NA	NA	NA	NA	NA	NA	NA
ENSG00000219545	AC006465.3	0.226136	0.640947	NA	NA	0.333122	0.202868	0.491891	0.0534467	0.335224	0.40412	0.268257	0.313021	0.4291	0.0935982	0.130082	0.740799	0.228284	0.396662	0.368111	0.160536	0.361521	0.269417	NA	NA	NA	NA	NA	NA	NA	NA	NA	NA	NA	NA
ENSG00000204957	AC006486.1	NA	NA	NA	NA	NA	NA	NA	NA	NA	NA	NA	NA	0.0206338	0.970252	NA	NA	1.83287	0.0030314	2.07396	0.000840023	NA	NA	NA	NA	NA	NA	NA	NA	NA	NA	NA	NA	NA	NA
ENSG00000268643	AC006486.9	0.0258273	0.971244	NA	NA	-0.977133	5.14708e-05	-0.274685	0.281395	-0.18634	0.673677	-0.554366	0.0246604	-0.0682838	0.80341	-0.0561883	0.89419	-0.777425	0.00141511	-0.458463	0.0668142	-0.110851	0.771207	NA	NA	NA	NA	NA	NA	NA	NA	NA	NA	NA	NA
ENSG00000224058	AC006509.7	-0.00628496	0.996075	NA	NA	NA	NA	0.0384696	0.939382	NA	NA	-1.13123	0.0220276	-0.224261	0.647512	-0.340713	0.585179	0.936087	0.0568055	1.04983	0.0253828	1.28296	0.0125801	NA	NA	NA	NA	NA	NA	NA	NA	NA	NA	NA	NA
ENSG00000261342	AC006538.1	-1.01703	0.0316277	NA	NA	1.01363	0.00459769	1.54703	6.08807e-05	-0.635111	0.235191	2.14164	1.14978e-06	2.5867	5.26488e-08	-0.181137	0.753319	2.41853	2.3881e-07	2.63353	6.85929e-08	-0.098415	0.872525	NA	NA	NA	NA	NA	NA	NA	NA	NA	NA	NA	NA
ENSG00000267001	AC006538.4	0.0870726	0.89734	NA	NA	0.274364	0.354139	0.92031	0.000836693	-0.47294	0.254003	0.667776	0.018352	1.01837	0.000223524	-0.271817	0.487484	0.575879	0.0436555	0.629537	0.0271045	-0.258787	0.507019	NA	NA	NA	NA	NA	NA	NA	NA	NA	NA	NA	NA
ENSG00000234409	AC006547.14	0.548045	0.61699	NA	NA	-2.29277	0.00285876	-4.62106	1.62858e-05	0.573632	0.565361	-3.0322	0.00025684	-4.36503	1.18197e-05	0.69508	0.373144	NA	NA	NA	NA	NA	NA	NA	NA	NA	NA	NA	NA	NA	NA	NA	NA	NA	NA
ENSG00000235859	AC006978.6	0.0799233	0.92474	NA	NA	0.523371	0.15119	0.542309	0.131629	0.485956	0.350925	-0.149793	0.707012	-0.136782	0.727754	0.113391	0.83794	-0.231185	0.56396	-0.439252	0.255705	0.637909	0.142317	NA	NA	NA	NA	NA	NA	NA	NA	NA	NA	NA	NA
ENSG00000229917	AC007014.1	NA	NA	NA	NA	NA	NA	NA	NA	NA	NA	NA	NA	NA	NA	NA	NA	-0.891378	0.127101	-0.927337	0.103646	-0.696531	0.313183	NA	NA	NA	NA	NA	NA	NA	NA	NA	NA	NA	NA
ENSG00000251660	AC007036.5	-0.501268	0.271888	NA	NA	0.151752	0.655695	0.0661049	0.849545	1.01978	0.01352	0.769298	0.0145339	0.664203	0.0346875	1.8109	1.30732e-05	0.0745647	0.836135	0.142703	0.688177	1.43093	0.000111403	NA	NA	NA	NA	NA	NA	NA	NA	NA	NA	NA	NA
ENSG00000229127	AC007038.7	0.0347007	0.977012	NA	NA	0.123638	0.804411	0.22127	0.638142	0.73408	0.208406	-0.502743	0.293997	-0.457682	0.328373	0.138753	0.83615	NA	NA	NA	NA	0.0395371	0.955967	NA	NA	NA	NA	NA	NA	NA	NA	NA	NA	NA	NA
ENSG00000258881	AC007040.11	0.277694	0.651138	NA	NA	-0.0884141	0.813654	0.444297	0.19116	-0.196541	0.745217	0.0161017	0.965921	0.434639	0.199744	-0.406962	0.340276	-0.39648	0.26003	-0.0202645	0.958211	-0.468009	0.268454	NA	NA	NA	NA	NA	NA	NA	NA	NA	NA	NA	NA
ENSG00000239322	AC007040.7	NA	NA	NA	NA	NA	NA	NA	NA	NA	NA	NA	NA	NA	NA	NA	NA	-0.465364	0.446725	-0.985857	0.100929	-1.18581	0.107661	NA	NA	NA	NA	NA	NA	NA	NA	NA	NA	NA	NA
ENSG00000229970	AC007128.1	NA	NA	NA	NA	NA	NA	NA	NA	NA	NA	NA	NA	NA	NA	NA	NA	7.78749	1.37858e-06	NA	NA	NA	NA	NA	NA	NA	NA	NA	NA	NA	NA	NA	NA	NA	NA
ENSG00000269696	AC007228.11	NA	NA	NA	NA	NA	NA	0.128871	0.802767	1.0062	0.131998	NA	NA	NA	NA	NA	NA	1.30028	0.0120721	1.13337	0.0269511	0.95314	0.137684	NA	NA	NA	NA	NA	NA	NA	NA	NA	NA	NA	NA
ENSG00000268568	AC007228.9	-0.119463	0.906557	NA	NA	-0.048087	0.921341	-0.299809	0.5152	-0.127695	0.880337	0.09837	0.839574	-0.195044	0.678665	-0.240893	0.70791	NA	NA	NA	NA	NA	NA	NA	NA	NA	NA	NA	NA	NA	NA	NA	NA	NA	NA
ENSG00000231043	AC007238.1	0.0779263	0.923423	NA	NA	-0.315022	0.388366	0.261531	0.470493	-0.655597	0.171782	-0.163841	0.666362	0.444567	0.202462	-0.0147753	0.980894	0.112743	0.771706	0.533236	0.131413	0.0359657	0.949448	NA	NA	NA	NA	NA	NA	NA	NA	NA	NA	NA	NA
ENSG00000231312	AC007246.3	-0.456281	0.320667	NA	NA	1.2043	4.20928e-05	0.993869	0.000735336	0.477856	0.278986	1.49911	1.23708e-06	1.27753	1.71026e-05	0.659472	0.074571	1.23672	3.47885e-05	1.18784	6.96714e-05	1.17004	0.000654822	NA	NA	NA	NA	NA	NA	NA	NA	NA	NA	NA	NA
ENSG00000217258	AC007249.3	NA	NA	NA	NA	1.82902	0.00681542	1.87651	0.00510078	NA	NA	NA	NA	3.66108	1.53168e-05	NA	NA	4.39852	3.46057e-06	3.78449	3.41104e-05	NA	NA	NA	NA	NA	NA	NA	NA	NA	NA	NA	NA	NA	NA
ENSG00000225264	AC007255.7	-0.197131	0.814915	NA	NA	-1.15624	0.00523811	-0.576965	0.154523	0.271009	0.682544	-0.418051	0.330847	-0.0394132	0.933021	-0.0193147	0.978139	0.802731	0.052583	0.524051	0.214661	0.362668	0.495363	NA	NA	NA	NA	NA	NA	NA	NA	NA	NA	NA	NA
ENSG00000213090	AC007256.5	NA	NA	NA	NA	NA	NA	NA	NA	NA	NA	NA	NA	NA	NA	NA	NA	NA	NA	0.983715	0.0818114	NA	NA	NA	NA	NA	NA	NA	NA	NA	NA	NA	NA	NA	NA
ENSG00000234431	AC007283.5	-0.281895	0.6757	NA	NA	-1.60566	9.00784e-05	-2.83083	4.4509e-08	0.642807	0.214965	-1.12694	0.00334504	-1.82948	1.98318e-05	0.748616	0.0966102	-1.0037	0.00838756	-1.6335	0.000103791	0.465493	0.308997	NA	NA	NA	NA	NA	NA	NA	NA	NA	NA	NA	NA
ENSG00000269318	AC007292.3	NA	NA	NA	NA	NA	NA	NA	NA	NA	NA	NA	NA	NA	NA	NA	NA	2.1703	0.0014584	2.23042	0.000969236	NA	NA	NA	NA	NA	NA	NA	NA	NA	NA	NA	NA	NA	NA
ENSG00000267980	AC007292.6	-0.907236	0.192488	NA	NA	0.524386	0.260071	1.41572	0.00222797	-0.577107	0.448502	1.67407	0.00104458	2.43295	8.9299e-06	NA	NA	1.77053	0.00114826	2.06148	0.00019775	NA	NA	NA	NA	NA	NA	NA	NA	NA	NA	NA	NA	NA	NA
ENSG00000172974	AC007318.5	0.117964	0.827425	NA	NA	-0.0185207	0.945699	-0.193121	0.441625	-0.0861781	0.856952	-0.225753	0.367158	-0.319092	0.187793	-0.230956	0.492758	-0.398173	0.0987871	-0.303311	0.220038	-0.301538	0.330437	NA	NA	NA	NA	NA	NA	NA	NA	NA	NA	NA	NA
ENSG00000224063	AC007319.1	-0.266777	0.795451	NA	NA	1.15583	0.0135339	0.249431	0.61042	-0.171069	0.85384	1.27689	0.00777883	0.517131	0.278451	0.0367666	0.965762	2.44878	1.71059e-05	1.97284	0.00025367	NA	NA	NA	NA	NA	NA	NA	NA	NA	NA	NA	NA	NA	NA
ENSG00000214696	AC007347.1	0.0393976	0.950591	NA	NA	-0.275538	0.264096	0.428056	0.0726571	-0.0238299	0.964893	-0.0551124	0.837857	0.474553	0.0449355	-0.0506764	0.901256	0.133686	0.607279	0.438244	0.0692681	0.0267439	0.947461	NA	NA	NA	NA	NA	NA	NA	NA	NA	NA	NA	NA
ENSG00000180672	AC007362.1	-0.702766	0.312091	NA	NA	0.637006	0.157141	0.389115	0.395046	-0.187843	0.828286	1.76801	0.000369683	1.38291	0.00356328	0.636066	0.290645	1.51744	0.00308065	1.68231	0.00124331	NA	NA	NA	NA	NA	NA	NA	NA	NA	NA	NA	NA	NA	NA
ENSG00000227946	AC007383.3	-0.129748	0.898772	NA	NA	-3.44735	1.05344e-06	-3.52996	5.28498e-07	0.368124	0.608247	-2.68359	2.04447e-05	-2.71085	1.19817e-05	0.577416	0.303469	-2.141	0.00014298	-2.45169	2.82733e-05	0.243818	0.696411	NA	NA	NA	NA	NA	NA	NA	NA	NA	NA	NA	NA
ENSG00000232613	AC007386.4	NA	NA	NA	NA	NA	NA	3.74857	5.09177e-05	NA	NA	NA	NA	NA	NA	NA	NA	NA	NA	NA	NA	NA	NA	NA	NA	NA	NA	NA	NA	NA	NA	NA	NA	NA	NA
ENSG00000218739	AC007390.5	0.180762	0.674771	NA	NA	0.106921	0.653126	0.104722	0.660562	-0.179305	0.644489	-0.116902	0.623311	-0.18089	0.430754	-0.148831	0.649962	-0.110483	0.646515	-0.00516189	0.983626	0.0505356	0.888934	NA	NA	NA	NA	NA	NA	NA	NA	NA	NA	NA	NA
ENSG00000243788	AC007390.6	NA	NA	NA	NA	0.376284	0.456623	NA	NA	NA	NA	NA	NA	NA	NA	NA	NA	0.370236	0.460957	-0.142766	0.785647	NA	NA	NA	NA	NA	NA	NA	NA	NA	NA	NA	NA	NA	NA
ENSG00000256845	AC007401.1	0.261229	0.6859	NA	NA	0.176078	0.637752	-0.187768	0.61459	-0.0789517	0.907817	-0.512633	0.148688	-0.432704	0.218849	-0.197602	0.683285	-0.451048	0.208646	-0.469461	0.191945	-0.115085	0.827816	NA	NA	NA	NA	NA	NA	NA	NA	NA	NA	NA	NA
ENSG00000222033	AC007405.2	NA	NA	NA	NA	NA	NA	NA	NA	NA	NA	8.90136	1.12523e-07	8.19416	6.00322e-07	NA	NA	4.39737	3.08339e-06	3.44269	7.70984e-05	NA	NA	NA	NA	NA	NA	NA	NA	NA	NA	NA	NA	NA	NA
ENSG00000239467	AC007405.6	NA	NA	NA	NA	NA	NA	NA	NA	NA	NA	NA	NA	NA	NA	NA	NA	3.52224	1.68601e-05	3.13528	5.68062e-05	NA	NA	NA	NA	NA	NA	NA	NA	NA	NA	NA	NA	NA	NA
ENSG00000228878	AC007551.3	NA	NA	NA	NA	1.69914	0.000204176	1.14312	0.0131655	NA	NA	NA	NA	1.34859	0.00309167	NA	NA	2.0557	8.95591e-06	1.19445	0.00994653	NA	NA	NA	NA	NA	NA	NA	NA	NA	NA	NA	NA	NA	NA
ENSG00000244055	AC007566.10	-0.668004	0.33244	NA	NA	0.118018	0.804685	-0.0336379	0.943728	1.04255	0.0834187	0.484803	0.298633	0.248516	0.605042	1.70389	0.0030691	-0.251187	0.61297	0.107198	0.831234	0.746845	0.167069	NA	NA	NA	NA	NA	NA	NA	NA	NA	NA	NA	NA
ENSG00000233251	AC007743.1	0.146377	0.830621	NA	NA	0.140947	0.675582	-0.369429	0.246164	1.14303	0.00718937	0.0652366	0.852063	-0.110676	0.74557	0.975525	0.00625606	-0.67949	0.0294605	-0.663842	0.0335896	0.644837	0.0803875	NA	NA	NA	NA	NA	NA	NA	NA	NA	NA	NA	NA
ENSG00000267213	AC007773.2	0.791543	0.17315	NA	NA	1.52877	0.000490773	1.03441	0.0133011	-0.122516	0.884105	1.20844	0.00341815	0.682764	0.0854058	-0.0081675	0.991622	1.96942	3.39065e-05	1.54167	0.00059451	0.815	0.121764	NA	NA	NA	NA	NA	NA	NA	NA	NA	NA	NA	NA
ENSG00000267662	AC007796.1	NA	NA	NA	NA	NA	NA	NA	NA	NA	NA	NA	NA	NA	NA	0.628744	0.44554	NA	NA	NA	NA	NA	NA	NA	NA	NA	NA	NA	NA	NA	NA	NA	NA	NA	NA
ENSG00000234902	AC007879.2	NA	NA	NA	NA	2.34052	9.297e-06	2.14536	3.02591e-05	NA	NA	NA	NA	NA	NA	NA	NA	0.695917	0.139417	0.398451	0.405084	NA	NA	NA	NA	NA	NA	NA	NA	NA	NA	NA	NA	NA	NA
ENSG00000223725	AC007879.5	NA	NA	NA	NA	2.26269	2.93904e-06	2.27223	1.50973e-06	NA	NA	2.03127	1.59132e-05	1.81244	0.000120848	NA	NA	0.817991	0.0806483	0.575096	0.220368	NA	NA	NA	NA	NA	NA	NA	NA	NA	NA	NA	NA	NA	NA
ENSG00000229647	AC007879.7	1.23178	0.27461	NA	NA	NA	NA	NA	NA	NA	NA	-0.41221	0.588046	-1.23843	0.0987949	-0.205427	0.857486	-0.812904	0.209082	-1.88044	0.00603258	-0.44948	0.602827	NA	NA	NA	NA	NA	NA	NA	NA	NA	NA	NA	NA
ENSG00000214670	AC007956.1	-0.00905952	0.992416	NA	NA	-0.147499	0.690873	0.383919	0.265996	-0.3751	0.475186	-0.053828	0.887898	0.554775	0.100654	-0.109984	0.834641	0.0426951	0.91412	0.294499	0.420571	-0.188938	0.704471	NA	NA	NA	NA	NA	NA	NA	NA	NA	NA	NA	NA
ENSG00000233762	AC007969.5	0.606546	0.188879	NA	NA	-0.00662834	0.98675	0.412093	0.240739	0.113842	0.863959	0.0626263	0.869589	-0.0910239	0.809123	0.208448	0.662359	0.28335	0.436942	-0.0062222	0.987466	0.165818	0.742298	NA	NA	NA	NA	NA	NA	NA	NA	NA	NA	NA	NA
ENSG00000268220	AC008040.1	NA	NA	NA	NA	5.43994	4.04196e-10	5.23913	8.36983e-10	NA	NA	4.63391	7.73146e-10	4.15125	6.16243e-09	NA	NA	2.35432	4.87889e-06	2.25214	8.23701e-06	NA	NA	NA	NA	NA	NA	NA	NA	NA	NA	NA	NA	NA	NA
ENSG00000239235	AC008280.5	-0.422316	0.465882	NA	NA	0.574405	0.111822	0.309113	0.406036	0.433321	0.416817	0.796583	0.0271752	0.62117	0.0849947	0.412513	0.372993	1.25394	0.000707436	1.03137	0.00568271	0.767754	0.0853169	NA	NA	NA	NA	NA	NA	NA	NA	NA	NA	NA	NA
ENSG00000268397	AC008443.1	0.0651573	0.928913	NA	NA	-0.518719	0.0819031	-0.860409	0.00310306	0.388028	0.391392	-0.620939	0.0376714	-1.20028	3.95794e-05	0.388851	0.310807	0.0787442	0.812182	-0.0633161	0.852482	0.514708	0.157493	NA	NA	NA	NA	NA	NA	NA	NA	NA	NA	NA	NA
ENSG00000268339	AC008537.1	NA	NA	NA	NA	NA	NA	2.28317	0.000235057	NA	NA	NA	NA	NA	NA	NA	NA	NA	NA	NA	NA	NA	NA	NA	NA	NA	NA	NA	NA	NA	NA	NA	NA	NA	NA
ENSG00000249738	AC008697.1	NA	NA	NA	NA	2.74652	5.59926e-05	NA	NA	NA	NA	NA	NA	1.56327	0.00828267	NA	NA	2.63072	9.2903e-05	NA	NA	NA	NA	NA	NA	NA	NA	NA	NA	NA	NA	NA	NA	NA	NA
ENSG00000256439	AC008731.1	0.323984	0.367715	NA	NA	-0.494423	0.0284847	-0.648484	0.00356973	-0.063509	0.891537	-0.382305	0.0957202	-0.621641	0.0051326	0.243637	0.442198	-0.478852	0.0347865	-0.524981	0.0206297	0.162525	0.614471	NA	NA	NA	NA	NA	NA	NA	NA	NA	NA	NA	NA
ENSG00000230259	AC008738.1	NA	NA	NA	NA	3.6464	3.99544e-09	2.8679	2.269e-07	NA	NA	4.10253	6.89212e-10	3.58454	6.1662e-09	NA	NA	1.684	8.30165e-05	0.354842	0.37087	0.00385151	0.994804	NA	NA	NA	NA	NA	NA	NA	NA	NA	NA	NA	NA
ENSG00000213702	AC008865.1	0.148267	0.791721	NA	NA	-1.18245	6.12011e-05	-1.17847	6.68841e-05	0.283192	0.498604	-0.844791	0.00221769	-1.35004	1.12161e-05	0.696518	0.0360063	-0.644243	0.0176739	-0.513669	0.0566768	0.665968	0.0403532	NA	NA	NA	NA	NA	NA	NA	NA	NA	NA	NA	NA
ENSG00000269688	AC008982.2	NA	NA	NA	NA	NA	NA	NA	NA	NA	NA	NA	NA	NA	NA	NA	NA	-2.15792	4.32585e-06	-2.37626	9.64946e-07	-1.72614	0.000437865	NA	NA	NA	NA	NA	NA	NA	NA	NA	NA	NA	NA
ENSG00000267751	AC009005.2	NA	NA	NA	NA	1.43058	0.002294	1.57941	0.000813936	NA	NA	0.993976	0.0351764	1.14673	0.0138533	NA	NA	0.881813	0.0531256	0.825895	0.0659221	0.191718	0.782706	NA	NA	NA	NA	NA	NA	NA	NA	NA	NA	NA	NA
ENSG00000260345	AC009052.12	0.00559275	0.99567	NA	NA	-0.579058	0.109509	-0.710699	0.0446377	-0.0945332	0.889208	-0.622679	0.0860088	-0.721966	0.041683	-0.414685	0.357253	-0.691666	0.0562649	-0.647733	0.0748585	-0.604842	0.161694	NA	NA	NA	NA	NA	NA	NA	NA	NA	NA	NA	NA
ENSG00000203343	AC009107.1	NA	NA	NA	NA	NA	NA	NA	NA	NA	NA	NA	NA	4.79808	4.83087e-07	NA	NA	NA	NA	2.23081	0.000856472	NA	NA	NA	NA	NA	NA	NA	NA	NA	NA	NA	NA	NA	NA
ENSG00000239763	AC009120.3	-0.603688	0.347808	NA	NA	0.665412	0.114437	1.23833	0.00186615	1.11093	0.0462426	0.71594	0.10579	1.26464	0.00228429	0.886095	0.0821393	0.66752	0.138654	0.924565	0.0316003	1.51376	0.00270066	NA	NA	NA	NA	NA	NA	NA	NA	NA	NA	NA	NA
ENSG00000259972	AC009120.6	-0.731526	0.160606	NA	NA	0.607084	0.118702	0.803934	0.0323375	0.936754	0.0576587	0.869284	0.0290242	0.879347	0.0250529	1.19083	0.00756567	-0.0205784	0.963703	0.364242	0.377224	0.938575	0.0304532	NA	NA	NA	NA	NA	NA	NA	NA	NA	NA	NA	NA
ENSG00000261690	AC009133.12	NA	NA	NA	NA	1.27396	0.0275185	1.33731	0.0203632	NA	NA	1.99412	0.00157632	2.16603	0.00062426	NA	NA	1.74821	0.00423727	1.87232	0.00236151	NA	NA	NA	NA	NA	NA	NA	NA	NA	NA	NA	NA	NA	NA
ENSG00000238045	AC009133.14	-0.00654736	0.996075	NA	NA	2.25701	2.7449e-06	2.44572	9.48707e-07	0.888006	0.144586	2.20958	3.98253e-06	2.4582	8.2436e-07	1.01971	0.0537744	2.3176	2.09622e-06	2.50455	7.55044e-07	0.50319	0.352264	NA	NA	NA	NA	NA	NA	NA	NA	NA	NA	NA	NA
ENSG00000261962	AC009133.20	NA	NA	NA	NA	2.24992	7.05135e-05	2.65303	6.11958e-06	NA	NA	3.20568	8.98111e-07	3.31377	4.70159e-07	NA	NA	2.90351	1.67372e-06	3.09673	5.71074e-07	NA	NA	NA	NA	NA	NA	NA	NA	NA	NA	NA	NA	NA	NA
ENSG00000227292	AC009229.5	-8.74634	3.13274e-09	NA	NA	-2.27777	1.80763e-05	-2.87076	8.40254e-07	0.997123	0.0536804	NA	NA	NA	NA	NA	NA	NA	NA	NA	NA	NA	NA	NA	NA	NA	NA	NA	NA	NA	NA	NA	NA	NA	NA
ENSG00000229160	AC009229.6	NA	NA	NA	NA	NA	NA	NA	NA	1.05311	0.140744	NA	NA	NA	NA	NA	NA	NA	NA	NA	NA	NA	NA	NA	NA	NA	NA	NA	NA	NA	NA	NA	NA	NA	NA
ENSG00000205054	AC009236.1	0.48198	0.58282	NA	NA	-2.73491	2.46736e-05	-5.21757	1.95096e-08	-0.202678	0.832482	-3.2963	2.2539e-06	-4.10971	1.37812e-07	-0.216992	0.771772	-0.593238	0.28184	-1.84048	0.00225871	-0.552372	0.432338	NA	NA	NA	NA	NA	NA	NA	NA	NA	NA	NA	NA
ENSG00000230383	AC009245.3	0.282472	0.731768	NA	NA	-0.763329	0.0992606	-0.935659	0.0350594	-0.881692	0.146783	-0.813023	0.0688022	-1.37462	0.00191219	-0.462699	0.394607	-1.2749	0.00630116	-2.21023	3.51992e-06	-0.404102	0.468769	NA	NA	NA	NA	NA	NA	NA	NA	NA	NA	NA	NA
ENSG00000232320	AC009299.5	-0.155861	0.811486	NA	NA	-0.560965	0.0590513	-0.763264	0.00898388	-0.0347947	0.95572	-0.485453	0.109745	-0.480037	0.109887	0.0269626	0.958867	-0.457975	0.140668	-0.354986	0.261967	0.0501682	0.921268	NA	NA	NA	NA	NA	NA	NA	NA	NA	NA	NA	NA
ENSG00000233287	AC009362.2	-0.435219	0.538013	NA	NA	-0.417666	0.361157	-0.591193	0.174696	-0.140581	0.860094	-0.594367	0.206258	-0.125495	0.796849	-0.675287	0.215073	0.535656	0.27367	0.151222	0.772558	NA	NA	NA	NA	NA	NA	NA	NA	NA	NA	NA	NA	NA	NA
ENSG00000216895	AC009403.2	0.254633	0.687638	NA	NA	0.165878	0.650915	0.0958182	0.796798	0.0024979	0.996947	0.277086	0.436814	0.315549	0.363862	-0.0666035	0.902257	0.679093	0.0452615	0.678631	0.0457457	0.373554	0.390269	NA	NA	NA	NA	NA	NA	NA	NA	NA	NA	NA	NA
ENSG00000236255	AC009404.2	-0.67779	0.365741	NA	NA	0.838599	0.0567236	1.48321	0.00114167	0.255782	0.760585	1.82013	0.0002331	1.98304	7.35981e-05	0.981399	0.102026	0.69584	0.0851321	0.884952	0.0300508	-0.0874381	0.89375	NA	NA	NA	NA	NA	NA	NA	NA	NA	NA	NA	NA
ENSG00000256309	AC009469.1	NA	NA	NA	NA	3.9309	3.46953e-08	2.88822	5.9648e-06	NA	NA	4.23846	7.30215e-08	3.96924	2.0834e-07	NA	NA	-0.686174	0.0988887	-1.61761	0.000411575	-0.597762	0.241086	NA	NA	NA	NA	NA	NA	NA	NA	NA	NA	NA	NA
ENSG00000226121	AC009487.6	0.288028	0.597949	NA	NA	-0.120141	0.720913	-0.193732	0.554871	-0.16232	0.775904	-0.464031	0.140781	-0.528152	0.0875456	-0.408415	0.299585	-0.356212	0.263216	-0.504785	0.105901	-0.465501	0.224759	NA	NA	NA	NA	NA	NA	NA	NA	NA	NA	NA	NA
ENSG00000203386	AC009499.1	NA	NA	NA	NA	9.62154	2.56414e-08	9.52204	2.79072e-08	NA	NA	NA	NA	NA	NA	NA	NA	NA	NA	NA	NA	NA	NA	NA	NA	NA	NA	NA	NA	NA	NA	NA	NA	NA	NA
ENSG00000224152	AC009506.1	-0.768898	0.258819	NA	NA	-1.78375	0.000680326	-2.51983	1.61728e-05	0.172013	0.844726	-1.49727	0.00476555	-2.22609	0.000130991	0.675213	0.261899	-0.332232	0.522173	-0.691769	0.175317	0.688459	0.259389	NA	NA	NA	NA	NA	NA	NA	NA	NA	NA	NA	NA
ENSG00000223960	AC009948.5	-0.106905	0.878647	NA	NA	-0.617982	0.044263	-0.655059	0.0317851	0.0980567	0.870255	-0.598477	0.0548228	-0.764787	0.0122947	0.000918105	0.998858	-0.691468	0.0271022	-0.631704	0.0442937	0.567102	0.132612	NA	NA	NA	NA	NA	NA	NA	NA	NA	NA	NA	NA
ENSG00000238082	AC009948.7	0.321336	0.645336	NA	NA	-0.334722	0.428403	0.036126	0.935452	-0.464108	0.43763	-0.172297	0.687872	0.147279	0.72709	-0.398231	0.424905	-0.759686	0.0617072	-0.550093	0.176923	-0.428822	0.386915	NA	NA	NA	NA	NA	NA	NA	NA	NA	NA	NA	NA
ENSG00000226266	AC009961.3	-0.124592	0.894161	NA	NA	1.7608	5.16871e-06	1.19266	0.00190584	-0.0927697	0.907831	1.38163	0.000394467	1.03303	0.00860969	0.240452	0.672697	1.36243	0.00131577	1.12228	0.00803646	0.528872	0.336989	NA	NA	NA	NA	NA	NA	NA	NA	NA	NA	NA	NA
ENSG00000249194	AC010127.4	NA	NA	NA	NA	8.16121	1.86016e-05	NA	NA	NA	NA	NA	NA	NA	NA	NA	NA	NA	NA	NA	NA	NA	NA	NA	NA	NA	NA	NA	NA	NA	NA	NA	NA	NA	NA
ENSG00000178550	AC010170.1	NA	NA	NA	NA	NA	NA	0.792549	0.298424	NA	NA	1.12516	0.145566	1.48978	0.0480009	NA	NA	0.0746868	0.923702	-0.214731	0.779183	-1.04637	0.25874	NA	NA	NA	NA	NA	NA	NA	NA	NA	NA	NA	NA
ENSG00000256989	AC010335.1	-0.250808	0.6859	NA	NA	-0.690366	0.0368373	-0.522175	0.115921	-0.333956	0.520436	-0.0160301	0.965812	-0.100884	0.782204	0.14314	0.770712	-0.396165	0.252971	-0.320037	0.365	-0.157519	0.74852	NA	NA	NA	NA	NA	NA	NA	NA	NA	NA	NA	NA
ENSG00000214248	AC010336.1	NA	NA	NA	NA	1.55039	0.000996863	1.57581	0.000723555	NA	NA	NA	NA	1.59418	0.000678433	NA	NA	NA	NA	NA	NA	NA	NA	NA	NA	NA	NA	NA	NA	NA	NA	NA	NA	NA	NA
ENSG00000269636	AC010441.1	0.129281	0.844729	NA	NA	-0.535245	0.0677869	-0.723593	0.0119053	-0.0752854	0.897616	-0.246873	0.425589	-0.284603	0.346274	-0.369566	0.333552	-0.464243	0.112871	-0.456269	0.120456	-0.574429	0.0993322	NA	NA	NA	NA	NA	NA	NA	NA	NA	NA	NA	NA
ENSG00000214784	AC010468.1	-0.122115	0.902856	NA	NA	-1.08603	0.0217639	-0.768198	0.0890345	0.0485864	0.955972	-0.288935	0.555164	-0.664495	0.152262	0.335843	0.564501	-0.332204	0.523078	-0.681394	0.163454	-0.271587	0.677995	NA	NA	NA	NA	NA	NA	NA	NA	NA	NA	NA	NA
ENSG00000267018	AC010525.7	0.781353	0.289478	NA	NA	NA	NA	NA	NA	NA	NA	-0.263181	0.602024	0.503472	0.272338	-0.708659	0.261731	NA	NA	1.28745	0.00922545	NA	NA	NA	NA	NA	NA	NA	NA	NA	NA	NA	NA	NA	NA
ENSG00000226180	AC010536.1	0.254271	0.764575	NA	NA	0.0333907	0.945633	1.40216	0.000349596	-0.720898	0.247778	0.472374	0.266628	1.50877	9.96611e-05	-0.531831	0.315571	1.30576	0.000898748	1.30013	0.000822634	-0.346762	0.519542	NA	NA	NA	NA	NA	NA	NA	NA	NA	NA	NA	NA
ENSG00000267216	AC010642.1	0.143089	0.771697	NA	NA	-0.559301	0.0131837	-0.0999897	0.688366	-0.323558	0.362209	-0.464933	0.0418688	-0.131734	0.588774	-0.375142	0.207489	-0.517413	0.0227305	-0.36331	0.11899	-0.658424	0.013652	NA	NA	NA	NA	NA	NA	NA	NA	NA	NA	NA	NA
ENSG00000269095	AC010646.3	-0.0292604	0.977291	NA	NA	-1.01941	0.00796642	-1.21591	0.00124978	-0.375129	0.520536	-0.886326	0.0215736	-1.11621	0.00332897	-0.325221	0.51307	-1.0832	0.00791749	-0.857368	0.0331652	-0.111286	0.853974	NA	NA	NA	NA	NA	NA	NA	NA	NA	NA	NA	NA
ENSG00000225402	AC010878.3	-0.00266158	0.997879	NA	NA	1.43431	6.91456e-05	1.85179	2.35596e-07	0.34737	0.56706	1.34516	0.000202189	1.76677	8.09917e-07	0.506317	0.277037	1.36833	0.000152074	1.22357	0.000722075	5.04582e-05	0.999953	NA	NA	NA	NA	NA	NA	NA	NA	NA	NA	NA	NA
ENSG00000234936	AC010883.5	NA	NA	NA	NA	NA	NA	NA	NA	NA	NA	NA	NA	NA	NA	NA	NA	NA	NA	1.49033	0.0122355	NA	NA	NA	NA	NA	NA	NA	NA	NA	NA	NA	NA	NA	NA
ENSG00000226853	AC010894.3	NA	NA	NA	NA	1.5268	0.000536669	1.858	1.30485e-05	NA	NA	2.43419	1.62902e-07	2.20152	8.76356e-07	NA	NA	1.31559	0.00266867	1.24063	0.00381383	0.38434	0.51164	NA	NA	NA	NA	NA	NA	NA	NA	NA	NA	NA	NA
ENSG00000215781	AC011043.1	-0.188622	0.705967	NA	NA	-3.12351	5.47424e-12	-2.64219	7.82424e-11	-0.318655	0.4188	-2.96699	1.49645e-11	-2.64166	8.2755e-11	-0.265578	0.444351	-1.58862	6.13106e-07	-1.58882	6.39469e-07	-0.0144205	0.972831	NA	NA	NA	NA	NA	NA	NA	NA	NA	NA	NA	NA
ENSG00000223658	AC011242.6	0.624851	0.253452	NA	NA	3.52723	1.99752e-09	2.69511	6.83769e-08	0.182072	0.80569	2.40984	2.55354e-07	1.64335	2.52748e-05	0.112597	0.847934	NA	NA	NA	NA	NA	NA	NA	NA	NA	NA	NA	NA	NA	NA	NA	NA	NA	NA
ENSG00000249839	AC011330.5	-0.295509	0.59937	NA	NA	1.24689	4.5304e-05	1.24998	4.24983e-05	-0.0477833	0.941295	1.31113	2.26978e-05	1.31878	1.85971e-05	-0.0940302	0.854153	1.15258	0.000226636	0.97685	0.00184445	0.245209	0.5777	NA	NA	NA	NA	NA	NA	NA	NA	NA	NA	NA	NA
ENSG00000268434	AC011530.4	-0.230416	0.672333	NA	NA	-1.16347	2.94899e-05	-1.19459	1.73203e-05	-0.145517	0.786144	-0.919936	0.00114679	-0.87481	0.00181645	0.0826167	0.859871	-0.233104	0.450547	-0.0616268	0.853592	0.218573	0.588536	NA	NA	NA	NA	NA	NA	NA	NA	NA	NA	NA	NA
ENSG00000204196	AC011737.2	-0.125666	0.828401	NA	NA	-0.433281	0.092797	-0.492574	0.0538772	0.130821	0.789161	-0.200455	0.461818	-0.366176	0.158534	0.304199	0.3835	-0.0886011	0.757621	-0.0326886	0.912887	0.34047	0.303129	NA	NA	NA	NA	NA	NA	NA	NA	NA	NA	NA	NA
ENSG00000231638	AC011738.4	NA	NA	NA	NA	4.284	5.9537e-06	3.36092	0.000213026	NA	NA	4.64646	3.17643e-06	4.45076	5.82345e-06	NA	NA	3.70268	1.03225e-06	2.22734	0.000486316	-0.0776513	0.936848	NA	NA	NA	NA	NA	NA	NA	NA	NA	NA	NA	NA
ENSG00000235092	AC011747.7	-1.44942	0.0141772	NA	NA	1.71553	0.000124321	1.27324	0.00263058	1.1535	0.0516272	1.40795	0.00360546	1.32449	0.00517479	0.738605	0.236826	4.1477	7.26655e-10	3.08925	1.01211e-07	NA	NA	NA	NA	NA	NA	NA	NA	NA	NA	NA	NA	NA	NA
ENSG00000212884	AC011841.1	-0.736949	0.212704	NA	NA	2.38848	4.36771e-07	1.82124	2.37428e-05	0.544638	0.358297	3.04994	1.59466e-08	2.68549	1.26644e-07	NA	NA	2.11064	1.93155e-06	0.948596	0.010444	0.489247	0.280879	NA	NA	NA	NA	NA	NA	NA	NA	NA	NA	NA	NA
ENSG00000229233	AC011891.5	NA	NA	NA	NA	0.897031	0.0467021	0.764697	0.0833694	1.50093	0.0174415	NA	NA	NA	NA	NA	NA	NA	NA	NA	NA	NA	NA	NA	NA	NA	NA	NA	NA	NA	NA	NA	NA	NA	NA
ENSG00000265629	AC011897.1	0.633612	0.176055	NA	NA	1.5634	4.73423e-06	1.00622	0.0033163	0.617025	0.2054	0.84226	0.0140555	0.777564	0.0223315	-0.198538	0.686542	5.28451	4.61702e-13	4.83397	2.9277e-12	NA	NA	NA	NA	NA	NA	NA	NA	NA	NA	NA	NA	NA	NA
ENSG00000257073	AC011933.1	0.0882552	0.857881	NA	NA	0.508939	0.0143593	0.760675	0.000198217	-0.134822	0.729844	0.708563	0.000555387	0.842377	3.49582e-05	-0.0339428	0.927298	0.592418	0.00453244	0.823493	7.22035e-05	-0.118584	0.705578	NA	NA	NA	NA	NA	NA	NA	NA	NA	NA	NA	NA
ENSG00000260396	AC012065.7	NA	NA	NA	NA	4.44743	7.89136e-07	NA	NA	NA	NA	NA	NA	NA	NA	NA	NA	-0.504446	0.288696	-1.3771	0.00496628	1.0448	0.0409847	NA	NA	NA	NA	NA	NA	NA	NA	NA	NA	NA	NA
ENSG00000234327	AC012146.7	0.309154	0.594862	NA	NA	-1.11155	0.000880748	-1.59916	1.84265e-06	-0.252327	0.655767	-1.25631	0.000168586	-1.45756	1.05526e-05	-0.415842	0.322411	-1.16863	0.000321651	-1.35594	3.09503e-05	-0.353412	0.401818	NA	NA	NA	NA	NA	NA	NA	NA	NA	NA	NA	NA
ENSG00000204685	AC012307.3	0.0868812	0.909684	NA	NA	-1.32365	7.86136e-05	-1.43008	1.78273e-05	0.39242	0.439225	-1.43542	2.14098e-05	-1.70944	4.11406e-07	0.104601	0.841	-1.04006	0.00200496	-1.5698	3.87114e-06	0.0369048	0.946906	NA	NA	NA	NA	NA	NA	NA	NA	NA	NA	NA	NA
ENSG00000226686	AC012309.5	NA	NA	NA	NA	NA	NA	NA	NA	NA	NA	NA	NA	NA	NA	NA	NA	-0.690891	0.168447	-0.85012	0.085253	0.22983	0.734953	NA	NA	NA	NA	NA	NA	NA	NA	NA	NA	NA	NA
ENSG00000237017	AC012314.8	NA	NA	NA	NA	3.04373	1.51583e-06	3.37624	3.35813e-07	0.291094	0.775209	3.84105	1.92624e-07	4.0818	6.79288e-08	NA	NA	3.89164	5.05004e-07	3.47938	3.13216e-06	NA	NA	NA	NA	NA	NA	NA	NA	NA	NA	NA	NA	NA	NA
ENSG00000225156	AC012354.6	NA	NA	NA	NA	NA	NA	NA	NA	NA	NA	NA	NA	NA	NA	NA	NA	0.538008	0.425957	0.562367	0.396435	0.164681	0.868671	NA	NA	NA	NA	NA	NA	NA	NA	NA	NA	NA	NA
ENSG00000227799	AC012358.4	1.43652	0.119305	NA	NA	NA	NA	NA	NA	NA	NA	-0.870882	0.200066	-3.16351	0.000389271	-1.54346	0.0707589	-1.80733	0.00819256	-1.83716	0.00599612	-0.12335	0.892139	NA	NA	NA	NA	NA	NA	NA	NA	NA	NA	NA	NA
ENSG00000203327	AC012358.7	NA	NA	NA	NA	NA	NA	NA	NA	NA	NA	NA	NA	NA	NA	1.40128	0.0307755	NA	NA	NA	NA	NA	NA	NA	NA	NA	NA	NA	NA	NA	NA	NA	NA	NA	NA
ENSG00000240401	AC012358.8	NA	NA	NA	NA	NA	NA	NA	NA	1.04738	0.243292	NA	NA	NA	NA	NA	NA	NA	NA	NA	NA	NA	NA	NA	NA	NA	NA	NA	NA	NA	NA	NA	NA	NA	NA
ENSG00000238273	AC012360.6	NA	NA	NA	NA	4.21493	9.78623e-08	4.04795	1.80319e-07	NA	NA	3.06575	2.30798e-06	2.23129	0.000141081	NA	NA	2.75281	6.00996e-05	2.9725	2.17412e-05	NA	NA	NA	NA	NA	NA	NA	NA	NA	NA	NA	NA	NA	NA
ENSG00000235883	AC012379.1	0.0607158	0.90682	NA	NA	0.257787	0.241929	0.047875	0.840361	-0.134226	0.738778	-0.0752019	0.750195	-0.0638983	0.786939	-0.251371	0.394936	0.0501384	0.835869	0.226395	0.316421	-0.0676561	0.844104	NA	NA	NA	NA	NA	NA	NA	NA	NA	NA	NA	NA
ENSG00000260597	AC012531.25	NA	NA	NA	NA	NA	NA	NA	NA	NA	NA	NA	NA	NA	NA	NA	NA	-1.55611	0.00158913	-2.78642	5.02005e-06	0.964696	0.0647155	NA	NA	NA	NA	NA	NA	NA	NA	NA	NA	NA	NA
ENSG00000198683	AC012615.1	0.125725	0.820058	NA	NA	-0.395187	0.109687	-0.655661	0.00648388	-0.159005	0.72517	-0.16187	0.537717	-0.428231	0.080461	-0.196117	0.584305	0.108662	0.686705	-0.24142	0.350635	-0.206119	0.542773	NA	NA	NA	NA	NA	NA	NA	NA	NA	NA	NA	NA
ENSG00000204588	AC013268.5	NA	NA	NA	NA	NA	NA	NA	NA	0.326507	0.741428	NA	NA	NA	NA	NA	NA	NA	NA	NA	NA	NA	NA	NA	NA	NA	NA	NA	NA	NA	NA	NA	NA	NA	NA
ENSG00000186148	AC013271.3	NA	NA	NA	NA	NA	NA	NA	NA	NA	NA	NA	NA	NA	NA	1.24156	0.173055	NA	NA	NA	NA	NA	NA	NA	NA	NA	NA	NA	NA	NA	NA	NA	NA	NA	NA
ENSG00000268412	AC013449.1	NA	NA	NA	NA	NA	NA	1.392	0.0125726	NA	NA	NA	NA	NA	NA	NA	NA	NA	NA	0.423165	0.431251	NA	NA	NA	NA	NA	NA	NA	NA	NA	NA	NA	NA	NA	NA
ENSG00000236048	AC013470.6	0.381093	0.517932	NA	NA	0.332862	0.376855	0.223232	0.55912	-0.171995	0.794406	-0.598722	0.102457	-0.743016	0.0379387	-0.283028	0.55652	-0.138568	0.737267	0.212897	0.597677	-0.14613	0.791979	NA	NA	NA	NA	NA	NA	NA	NA	NA	NA	NA	NA
ENSG00000237805	AC015849.2	NA	NA	NA	NA	NA	NA	4.66279	4.13563e-06	NA	NA	NA	NA	5.01492	4.31199e-06	NA	NA	4.49679	1.10555e-05	NA	NA	NA	NA	NA	NA	NA	NA	NA	NA	NA	NA	NA	NA	NA	NA
ENSG00000267858	AC016629.8	0.200239	0.794964	NA	NA	-0.0941351	0.818274	0.136757	0.73269	0.56146	0.271338	-0.314093	0.420904	-0.222012	0.567252	0.25781	0.603032	1.06182	0.00366432	0.599775	0.112073	0.33755	0.49259	NA	NA	NA	NA	NA	NA	NA	NA	NA	NA	NA	NA
ENSG00000189223	AC016683.6	-0.0384678	0.965817	NA	NA	0.609553	0.0657602	-0.284012	0.414283	0.604212	0.18385	1.27646	7.94424e-05	0.682633	0.0372908	0.512507	0.206347	2.41123	9.4932e-09	2.06169	1.38711e-07	1.034	0.0104848	NA	NA	NA	NA	NA	NA	NA	NA	NA	NA	NA	NA
ENSG00000239332	AC016722.2	-0.0151478	0.993198	NA	NA	-1.07691	0.0929802	-1.88859	0.00534038	-0.562256	0.590361	-0.821171	0.200009	-1.66824	0.0120549	-0.367635	0.682468	-0.327608	0.611261	-1.35009	0.0339113	-1.11535	0.147629	NA	NA	NA	NA	NA	NA	NA	NA	NA	NA	NA	NA
ENSG00000224043	AC016725.4	0.0368133	0.971244	NA	NA	-0.0271443	0.949868	-0.262665	0.507915	-0.351221	0.554899	-0.248512	0.540792	-0.514436	0.180625	-0.198253	0.706453	0.229338	0.587012	-0.0314411	0.94408	-0.244953	0.651818	NA	NA	NA	NA	NA	NA	NA	NA	NA	NA	NA	NA
ENSG00000213194	AC016732.2	NA	NA	NA	NA	NA	NA	NA	NA	NA	NA	NA	NA	NA	NA	0.887716	0.0868286	NA	NA	0.533073	0.264538	0.765373	0.149768	NA	NA	NA	NA	NA	NA	NA	NA	NA	NA	NA	NA
ENSG00000228305	AC016734.2	0.146102	0.847699	NA	NA	-0.582548	0.0990068	-0.212695	0.565138	-0.339988	0.537595	-0.375326	0.299866	-0.205496	0.576084	-0.332399	0.464006	-0.642236	0.063279	-0.236127	0.524591	-0.520019	0.214485	NA	NA	NA	NA	NA	NA	NA	NA	NA	NA	NA	NA
ENSG00000218175	AC016739.2	0.00500789	0.995044	NA	NA	-0.17299	0.553138	-0.335776	0.227364	0.0465249	0.934738	-0.511123	0.0633605	-0.408984	0.138404	-0.0452728	0.92332	-0.244597	0.396979	-0.137105	0.650823	0.132029	0.749334	NA	NA	NA	NA	NA	NA	NA	NA	NA	NA	NA	NA
ENSG00000234997	AC016745.3	NA	NA	NA	NA	NA	NA	NA	NA	NA	NA	NA	NA	NA	NA	1.00088	0.187006	NA	NA	NA	NA	NA	NA	NA	NA	NA	NA	NA	NA	NA	NA	NA	NA	NA	NA
ENSG00000212978	AC016747.3	0.00128608	0.998631	NA	NA	0.14746	0.57659	-0.280112	0.268609	-0.0322798	0.952386	0.0524963	0.849769	-0.265703	0.295027	0.0991191	0.802031	0.793171	0.000987111	0.340207	0.179238	0.593859	0.042005	NA	NA	NA	NA	NA	NA	NA	NA	NA	NA	NA	NA
ENSG00000218422	AC016773.1	-0.0714544	0.964089	NA	NA	-5.41642	1.89549e-08	-5.0679	3.78771e-08	-1.63905	0.0581094	-5.43793	2.13118e-08	-4.88642	6.02302e-08	-1.27998	0.0884916	-3.11507	2.16969e-05	-3.24708	1.43539e-05	-0.979228	0.183935	NA	NA	NA	NA	NA	NA	NA	NA	NA	NA	NA	NA
ENSG00000233559	AC016831.7	1.24862	0.167625	NA	NA	0.737381	0.271299	NA	NA	NA	NA	1.01047	0.0925291	0.591048	0.326349	-0.633625	0.450161	2.6727	0.000135667	1.59023	0.013723	0.516534	0.558579	NA	NA	NA	NA	NA	NA	NA	NA	NA	NA	NA	NA
ENSG00000233862	AC016907.3	NA	NA	NA	NA	3.43056	6.42391e-07	2.99052	5.27037e-06	NA	NA	NA	NA	2.75124	1.77013e-05	NA	NA	3.3238	1.78374e-05	NA	NA	NA	NA	NA	NA	NA	NA	NA	NA	NA	NA	NA	NA	NA	NA
ENSG00000163364	AC017048.3	NA	NA	NA	NA	NA	NA	NA	NA	NA	NA	NA	NA	NA	NA	NA	NA	2.85466	1.09513e-05	1.85086	0.00103917	NA	NA	NA	NA	NA	NA	NA	NA	NA	NA	NA	NA	NA	NA
ENSG00000226598	AC017060.1	NA	NA	NA	NA	NA	NA	NA	NA	NA	NA	NA	NA	NA	NA	0.727186	0.358524	NA	NA	NA	NA	NA	NA	NA	NA	NA	NA	NA	NA	NA	NA	NA	NA	NA	NA
ENSG00000227359	AC017074.2	0.598029	0.31128	NA	NA	-0.45231	0.321734	-0.417259	0.34383	-0.316979	0.655742	-0.558756	0.192205	-0.572408	0.173494	-0.883464	0.064714	-0.579532	0.207	-0.604699	0.176175	-0.527628	0.323233	NA	NA	NA	NA	NA	NA	NA	NA	NA	NA	NA	NA
ENSG00000228486	AC017099.3	0.37946	0.562244	NA	NA	2.40122	5.45022e-08	2.08065	5.53351e-07	1.51412	0.00439016	1.90323	1.74557e-06	1.36709	0.000143866	1.13059	0.00865267	1.13491	0.00125859	0.420161	0.262197	0.481373	0.280956	NA	NA	NA	NA	NA	NA	NA	NA	NA	NA	NA	NA
ENSG00000224376	AC017104.6	NA	NA	NA	NA	NA	NA	1.31527	0.0119353	1.33621	0.0733515	0.863142	0.102942	1.31045	0.0124533	0.782213	0.24879	1.85025	0.0022353	1.89396	0.00175844	NA	NA	NA	NA	NA	NA	NA	NA	NA	NA	NA	NA	NA	NA
ENSG00000239775	AC017116.11	-0.430082	0.516157	NA	NA	-0.0187105	0.965281	-0.328496	0.408286	0.380533	0.543745	0.17649	0.673997	-0.600951	0.135005	0.511947	0.316438	0.717218	0.0750446	0.620264	0.124726	-0.12369	0.845095	NA	NA	NA	NA	NA	NA	NA	NA	NA	NA	NA	NA
ENSG00000235314	AC017116.8	NA	NA	NA	NA	3.09433	6.82665e-07	2.88177	1.92485e-06	NA	NA	3.32657	1.92169e-07	3.39791	1.34386e-07	NA	NA	8.33873	2.36917e-08	NA	NA	NA	NA	NA	NA	NA	NA	NA	NA	NA	NA	NA	NA	NA	NA
ENSG00000242735	AC018462.3	-0.339056	0.643714	NA	NA	-0.805224	0.0579305	-0.323503	0.448764	0.211973	0.76654	-0.182904	0.692498	-0.216694	0.629497	0.606646	0.2138	-0.183014	0.695316	-0.0933462	0.844976	0.359023	0.497532	NA	NA	NA	NA	NA	NA	NA	NA	NA	NA	NA	NA
ENSG00000234520	AC018464.3	1.03632	0.249896	NA	NA	0.203767	0.766004	-1.05269	0.118529	-0.191384	0.879108	-1.12895	0.0761515	-2.06731	0.00254452	0.109599	0.909745	1.32018	0.0376301	-0.298051	0.668459	0.133911	0.895396	NA	NA	NA	NA	NA	NA	NA	NA	NA	NA	NA	NA
ENSG00000229358	AC018633.4	-0.694374	0.192872	NA	NA	-1.7273	3.70288e-05	-1.65212	4.72909e-05	0.248327	0.710447	-0.457746	0.30099	-1.10576	0.0096339	0.876848	0.0553132	-0.130384	0.777514	-0.682658	0.102009	0.664623	0.152294	NA	NA	NA	NA	NA	NA	NA	NA	NA	NA	NA	NA
ENSG00000236753	AC018642.1	-0.332858	0.503473	NA	NA	1.3599	1.70254e-06	1.17539	3.32242e-05	0.421628	0.337964	1.51164	2.55517e-07	1.41476	8.0988e-07	0.571182	0.114272	1.96063	6.17433e-09	2.10564	1.86518e-09	0.398444	0.301405	NA	NA	NA	NA	NA	NA	NA	NA	NA	NA	NA	NA
ENSG00000231952	AC018648.5	-0.946459	0.0788799	NA	NA	-1.33902	0.0034139	-1.43631	0.00111716	-0.00889259	0.992495	NA	NA	NA	NA	NA	NA	-0.636134	0.189497	-0.530412	0.259391	-0.330933	0.577687	NA	NA	NA	NA	NA	NA	NA	NA	NA	NA	NA	NA
ENSG00000236859	AC018737.1	-0.0529186	0.945804	NA	NA	0.919379	0.00183161	0.843003	0.00427534	0.0572682	0.92798	0.66839	0.0271796	0.651041	0.0300295	0.215657	0.617008	1.11246	0.000227551	1.20807	6.19796e-05	0.776746	0.0309878	NA	NA	NA	NA	NA	NA	NA	NA	NA	NA	NA	NA
ENSG00000167765	AC018755.11	NA	NA	NA	NA	2.05905	0.00103832	1.59818	0.00859373	NA	NA	1.48183	0.0112784	1.63823	0.00491999	NA	NA	2.4866	0.000306057	2.73186	9.61359e-05	NA	NA	NA	NA	NA	NA	NA	NA	NA	NA	NA	NA	NA	NA
ENSG00000267861	AC018755.15	-0.458682	0.483669	NA	NA	-0.0720832	0.872627	0.862838	0.0244228	0.362716	0.565866	1.00723	0.0111399	1.16543	0.00313763	0.388514	0.468287	0.355109	0.415832	0.528596	0.207424	-0.142689	0.819326	NA	NA	NA	NA	NA	NA	NA	NA	NA	NA	NA	NA
ENSG00000267896	AC018766.4	0.0981586	0.907233	NA	NA	-0.82656	0.030683	-0.866288	0.0207312	-0.429446	0.448222	-1.31137	0.000602869	-0.728484	0.0537192	-0.448801	0.337954	-0.876414	0.0263124	-1.04179	0.00731027	-0.508322	0.28374	NA	NA	NA	NA	NA	NA	NA	NA	NA	NA	NA	NA
ENSG00000269352	AC018766.5	0.25363	0.687828	NA	NA	-0.977391	0.00374665	-0.588005	0.0835592	-0.40374	0.431781	-1.59387	5.55838e-06	-1.10546	0.0008841	-0.633996	0.114122	-0.816717	0.0177403	-1.13249	0.00093196	-0.432523	0.315564	NA	NA	NA	NA	NA	NA	NA	NA	NA	NA	NA	NA
ENSG00000213225	AC018804.7	0.203243	0.894912	NA	NA	2.58131	0.000134778	2.54725	0.000152996	-1.24807	0.258221	2.75356	5.586e-05	2.36272	0.00029359	-1.31817	0.142211	0.792347	0.221489	0.350166	0.612891	NA	NA	NA	NA	NA	NA	NA	NA	NA	NA	NA	NA	NA	NA
ENSG00000180178	AC018865.8	NA	NA	NA	NA	10.964	3.07328e-09	10.5757	7.21302e-09	NA	NA	6.58603	1.19082e-08	6.51198	1.29013e-08	NA	NA	8.88255	2.69556e-09	7.43231	7.60813e-08	NA	NA	NA	NA	NA	NA	NA	NA	NA	NA	NA	NA	NA	NA
ENSG00000231822	AC019097.7	0.054378	0.955489	NA	NA	-0.14252	0.736766	-0.136449	0.744344	-0.318441	0.607308	-0.775059	0.0490211	-0.487833	0.215525	-0.365163	0.461839	-0.672893	0.0905664	-0.801355	0.040296	-0.38464	0.435025	NA	NA	NA	NA	NA	NA	NA	NA	NA	NA	NA	NA
ENSG00000236039	AC019117.2	0.345692	0.802563	NA	NA	-0.690171	0.315846	-2.71955	0.000737266	0.0843419	0.950642	-0.759377	0.260623	-3.18855	0.000154045	0.586086	0.493553	NA	NA	NA	NA	NA	NA	NA	NA	NA	NA	NA	NA	NA	NA	NA	NA	NA	NA
ENSG00000204253	AC019178.1	0.387892	0.448938	NA	NA	-1.029	0.00126051	-1.43653	6.42056e-06	-0.309426	0.549617	-1.19062	0.000193713	-1.27302	5.64404e-05	-0.104703	0.834166	-0.799982	0.0137902	-0.957893	0.00298587	-0.073084	0.888284	NA	NA	NA	NA	NA	NA	NA	NA	NA	NA	NA	NA
ENSG00000243637	AC019221.4	-0.820748	0.0453601	NA	NA	-0.53733	0.121424	-0.770534	0.0228886	-0.0263971	0.970679	0.0288867	0.941767	-0.06423	0.869593	0.216053	0.655629	0.379333	0.307997	0.55647	0.124868	0.16559	0.754795	NA	NA	NA	NA	NA	NA	NA	NA	NA	NA	NA	NA
ENSG00000256599	AC020663.1	0.178163	0.688212	NA	NA	-0.253926	0.274664	0.2368	0.307407	-0.229646	0.543544	-0.163423	0.494801	0.252004	0.274522	-0.192078	0.555506	-0.215021	0.361237	0.0392114	0.880705	-0.0953613	0.783961	NA	NA	NA	NA	NA	NA	NA	NA	NA	NA	NA	NA
ENSG00000203403	AC020907.2	NA	NA	NA	NA	2.79604	5.55664e-06	2.67621	8.64449e-06	NA	NA	4.09161	2.84736e-07	NA	NA	NA	NA	NA	NA	NA	NA	NA	NA	NA	NA	NA	NA	NA	NA	NA	NA	NA	NA	NA	NA
ENSG00000253950	AC020907.6	-0.271265	0.551244	NA	NA	-0.00199421	0.994695	0.0173681	0.952551	0.247377	0.566599	0.42377	0.102615	0.248694	0.349575	0.586931	0.0639087	0.0882355	0.75806	-0.0598296	0.839939	0.268895	0.434794	NA	NA	NA	NA	NA	NA	NA	NA	NA	NA	NA	NA
ENSG00000256383	AC020910.2	1.42398	0.00129443	NA	NA	1.00151	0.0175451	0.924203	0.0264207	NA	NA	0.38065	0.351466	0.345003	0.395584	0.581524	0.210589	0.300683	0.471763	-0.335963	0.422421	0.0947145	0.874939	NA	NA	NA	NA	NA	NA	NA	NA	NA	NA	NA	NA
ENSG00000267531	AC020922.1	-0.467276	0.573245	NA	NA	0.276358	0.561663	0.554244	0.225088	0.160717	0.85929	0.16822	0.736023	0.546201	0.240282	0.285715	0.677098	0.374689	0.449218	0.551668	0.257436	0.228225	0.755939	NA	NA	NA	NA	NA	NA	NA	NA	NA	NA	NA	NA
ENSG00000230747	AC021188.4	NA	NA	NA	NA	NA	NA	NA	NA	NA	NA	NA	NA	NA	NA	NA	NA	NA	NA	2.88674	0.00270725	NA	NA	NA	NA	NA	NA	NA	NA	NA	NA	NA	NA	NA	NA
ENSG00000224512	AC021593.1	-0.0746111	0.9264	NA	NA	-0.0344947	0.928394	-0.0200017	0.959034	0.247013	0.667172	0.143752	0.700911	0.0932024	0.804002	0.240527	0.606622	0.587087	0.0950689	0.075983	0.849861	0.409619	0.35461	NA	NA	NA	NA	NA	NA	NA	NA	NA	NA	NA	NA
ENSG00000196355	AC021860.1	-1.94591	0.0213354	NA	NA	0.0978544	0.878291	-2.12348	0.00234713	1.65086	0.0436852	NA	NA	NA	NA	2.72678	0.00183841	NA	NA	NA	NA	NA	NA	NA	NA	NA	NA	NA	NA	NA	NA	NA	NA	NA	NA
ENSG00000206567	AC022007.5	-0.247915	0.783367	NA	NA	1.12934	0.00780515	1.13737	0.00715884	0.187246	0.814875	0.878911	0.0385332	1.24464	0.00385563	0.055831	0.940022	1.43166	0.00296288	1.28918	0.00677821	0.619028	0.318628	NA	NA	NA	NA	NA	NA	NA	NA	NA	NA	NA	NA
ENSG00000213399	AC022210.2	NA	NA	NA	NA	NA	NA	NA	NA	NA	NA	NA	NA	-0.113748	0.862812	NA	NA	0.56195	0.371208	NA	NA	NA	NA	NA	NA	NA	NA	NA	NA	NA	NA	NA	NA	NA	NA
ENSG00000226221	AC022431.1	-0.162949	0.792779	NA	NA	-0.0684722	0.827381	-0.0204002	0.949453	0.353706	0.423227	0.110341	0.726155	-0.100289	0.749625	0.262066	0.505832	0.142053	0.649703	0.0563232	0.864909	0.30055	0.427513	NA	NA	NA	NA	NA	NA	NA	NA	NA	NA	NA	NA
ENSG00000197604	AC022532.1	NA	NA	NA	NA	4.54055	1.95603e-07	5.33317	1.09828e-08	NA	NA	4.88152	3.56822e-08	5.2594	8.83762e-09	NA	NA	2.51387	6.25978e-05	2.81778	1.53505e-05	NA	NA	NA	NA	NA	NA	NA	NA	NA	NA	NA	NA	NA	NA
ENSG00000226145	AC022596.6	NA	NA	NA	NA	NA	NA	NA	NA	NA	NA	NA	NA	NA	NA	NA	NA	0.599199	0.33302	NA	NA	NA	NA	NA	NA	NA	NA	NA	NA	NA	NA	NA	NA	NA	NA
ENSG00000230647	AC022816.2	NA	NA	NA	NA	9.73905	2.60558e-06	8.0371	0.000142711	NA	NA	6.2456	4.70441e-05	5.87767	0.000102433	NA	NA	6.56629	3.23875e-06	NA	NA	NA	NA	NA	NA	NA	NA	NA	NA	NA	NA	NA	NA	NA	NA
ENSG00000235885	AC023115.2	NA	NA	NA	NA	NA	NA	NA	NA	0.861516	0.408942	NA	NA	NA	NA	0.762449	0.409059	NA	NA	NA	NA	NA	NA	NA	NA	NA	NA	NA	NA	NA	NA	NA	NA	NA	NA
ENSG00000214135	AC024560.3	-0.090026	0.87364	NA	NA	-0.0535642	0.840951	0.00798994	0.977254	0.359088	0.329328	-0.0198018	0.94233	-0.103626	0.691559	0.388005	0.216558	-0.0370744	0.893169	0.0420863	0.880743	0.247139	0.448624	NA	NA	NA	NA	NA	NA	NA	NA	NA	NA	NA	NA
ENSG00000267740	AC024592.12	0.117309	0.811829	NA	NA	-0.204786	0.370152	-0.196336	0.389467	-0.435844	0.169109	-0.117528	0.619891	-0.0321519	0.897525	-0.250276	0.408475	0.0397621	0.873006	0.0383939	0.880224	-0.130871	0.68631	NA	NA	NA	NA	NA	NA	NA	NA	NA	NA	NA	NA
ENSG00000269850	AC025170.1	NA	NA	NA	NA	NA	NA	4.88211	6.89583e-06	NA	NA	NA	NA	NA	NA	NA	NA	3.04184	0.000126163	2.72781	0.000435007	NA	NA	NA	NA	NA	NA	NA	NA	NA	NA	NA	NA	NA	NA
ENSG00000215068	AC025171.1	-0.554774	0.259797	NA	NA	-1.76034	1.0633e-05	-2.0785	1.20985e-06	0.457025	0.368582	-1.57616	6.00507e-05	-1.36267	0.000289301	0.596181	0.160836	0.186379	0.614604	-0.518855	0.138452	1.05203	0.0130763	NA	NA	NA	NA	NA	NA	NA	NA	NA	NA	NA	NA
ENSG00000204752	AC025278.1	NA	NA	NA	NA	8.9627	0.000137299	8.72109	0.00021365	NA	NA	10.2087	1.75055e-05	10.254	1.41267e-05	NA	NA	9.33275	8.66561e-05	9.1043	0.000143327	NA	NA	NA	NA	NA	NA	NA	NA	NA	NA	NA	NA	NA	NA
ENSG00000179859	AC025335.1	-0.74243	0.074752	NA	NA	1.04507	0.00119342	0.920092	0.00425332	0.432129	0.38108	1.2043	0.000266115	1.39731	1.81801e-05	0.390456	0.373594	0.163003	0.651998	-0.41293	0.228867	0.065758	0.90135	NA	NA	NA	NA	NA	NA	NA	NA	NA	NA	NA	NA
ENSG00000231645	AC025627.9	NA	NA	NA	NA	NA	NA	NA	NA	NA	NA	0.974018	0.0443439	0.37591	0.450339	NA	NA	NA	NA	NA	NA	NA	NA	NA	NA	NA	NA	NA	NA	NA	NA	NA	NA	NA	NA
ENSG00000174977	AC026271.5	-0.403035	0.449641	NA	NA	-0.830462	0.0128239	-1.06646	0.00120865	-0.142476	0.819258	-0.959673	0.00477916	-0.974606	0.00359426	0.0556846	0.919689	-1.03406	0.00195545	-0.976088	0.00344622	-0.166697	0.734104	NA	NA	NA	NA	NA	NA	NA	NA	NA	NA	NA	NA
ENSG00000181495	AC026703.1	-0.0293471	0.987397	NA	NA	-0.815309	0.210918	-1.64753	0.013849	0.109827	0.933877	-0.753363	0.250269	-2.50127	0.000536661	0.308592	0.751089	-0.0525621	0.941244	-0.0232986	0.974033	0.977827	0.233607	NA	NA	NA	NA	NA	NA	NA	NA	NA	NA	NA	NA
ENSG00000268913	AC026806.2	0.107933	0.887326	NA	NA	-2.54414	5.66963e-08	-3.10098	2.77061e-09	0.208266	0.726485	-1.98727	2.13347e-06	-2.57673	4.2767e-08	0.389447	0.378889	-2.42832	1.59049e-07	-2.67249	3.98885e-08	0.0524754	0.923843	NA	NA	NA	NA	NA	NA	NA	NA	NA	NA	NA	NA
ENSG00000233858	AC026904.1	NA	NA	NA	NA	NA	NA	NA	NA	NA	NA	NA	NA	NA	NA	NA	NA	4.35396	1.51302e-05	NA	NA	NA	NA	NA	NA	NA	NA	NA	NA	NA	NA	NA	NA	NA	NA
ENSG00000268798	AC027307.3	0.0271378	0.979933	NA	NA	-1.1688	0.00365147	-0.764373	0.0514727	-0.496043	0.390067	-0.849393	0.0346604	-1.38888	0.000587934	-0.419947	0.400018	-0.578287	0.157019	-0.459351	0.261495	0.0351528	0.954261	NA	NA	NA	NA	NA	NA	NA	NA	NA	NA	NA	NA
ENSG00000143429	AC027612.6	NA	NA	NA	NA	NA	NA	NA	NA	NA	NA	NA	NA	NA	NA	NA	NA	-0.380708	0.361291	-0.620927	0.13355	-0.227464	0.688819	NA	NA	NA	NA	NA	NA	NA	NA	NA	NA	NA	NA
ENSG00000215067	AC027763.2	-0.28019	0.608914	NA	NA	0.451114	0.140295	0.653457	0.0283973	0.24088	0.640944	0.800148	0.00776211	0.789443	0.00810951	0.396036	0.312721	1.07898	0.000344739	1.19486	7.27267e-05	0.766237	0.0330325	NA	NA	NA	NA	NA	NA	NA	NA	NA	NA	NA	NA
ENSG00000255990	AC034102.1	-0.538652	0.0417492	NA	NA	-0.12484	0.585252	0.0262388	0.912872	-0.0434106	0.924671	0.38493	0.071608	0.522846	0.0120824	0.474851	0.0724158	0.184451	0.413504	0.636954	0.00246934	0.831223	0.000574265	NA	NA	NA	NA	NA	NA	NA	NA	NA	NA	NA	NA
ENSG00000180385	AC034193.5	0.321761	0.668265	NA	NA	-2.32342	5.28332e-06	-0.997288	0.0154325	-0.538919	0.388014	-2.69234	6.92501e-07	-1.80402	8.02599e-05	-0.851752	0.0951193	-1.96949	3.28337e-05	-1.5505	0.000471841	-0.752339	0.127138	NA	NA	NA	NA	NA	NA	NA	NA	NA	NA	NA	NA
ENSG00000233006	AC034220.3	-0.783753	0.0546615	NA	NA	2.68329	9.79302e-10	1.99989	1.71582e-07	0.711936	0.102212	3.12817	1.07862e-10	2.48904	6.53262e-09	1.29293	0.00179032	2.73213	1.32879e-09	2.59996	3.31975e-09	1.079	0.0042623	NA	NA	NA	NA	NA	NA	NA	NA	NA	NA	NA	NA
ENSG00000253404	AC034243.1	NA	NA	NA	NA	NA	NA	NA	NA	NA	NA	NA	NA	NA	NA	NA	NA	2.50329	0.000766923	1.99862	0.0051222	NA	NA	NA	NA	NA	NA	NA	NA	NA	NA	NA	NA	NA	NA
ENSG00000248235	AC037459.4	0.175891	0.797163	NA	NA	-1.49972	2.98109e-05	-2.05122	4.38291e-07	-0.245174	0.654147	-1.09995	0.00103269	-1.74756	4.27756e-06	-0.0612212	0.906798	-1.19282	0.000486476	-1.4326	6.83185e-05	0.0466264	0.928223	NA	NA	NA	NA	NA	NA	NA	NA	NA	NA	NA	NA
ENSG00000237102	AC040160.1	0.278008	0.799106	NA	NA	NA	NA	NA	NA	NA	NA	-0.0308467	0.955089	-0.0223287	0.967709	-0.127249	0.873425	NA	NA	0.27716	0.631838	NA	NA	NA	NA	NA	NA	NA	NA	NA	NA	NA	NA	NA	NA
ENSG00000257026	AC040173.1	-0.299191	0.560383	NA	NA	0.665127	0.0209899	0.363953	0.220322	0.249706	0.612569	0.398566	0.186752	0.147423	0.640773	0.233468	0.574633	0.284317	0.354955	-0.103535	0.753756	0.403366	0.278229	NA	NA	NA	NA	NA	NA	NA	NA	NA	NA	NA	NA
ENSG00000229334	AC046143.3	0.832587	0.288908	NA	NA	-2.35015	0.000726413	-3.60919	1.41478e-05	0.112133	0.919263	-2.43285	0.000215513	-3.04034	1.82383e-05	-0.651532	0.33783	-3.37914	1.68375e-06	-4.67329	3.57632e-08	-1.08018	0.076822	NA	NA	NA	NA	NA	NA	NA	NA	NA	NA	NA	NA
ENSG00000233058	AC046143.7	NA	NA	NA	NA	5.1181	2.35421e-13	5.05088	3.31944e-13	NA	NA	5.53974	9.61622e-14	5.38326	1.53914e-13	NA	NA	6.35667	7.87556e-14	6.25228	1.1204e-13	NA	NA	NA	NA	NA	NA	NA	NA	NA	NA	NA	NA	NA	NA
ENSG00000229525	AC053503.4	NA	NA	NA	NA	NA	NA	4.71644	3.70509e-05	NA	NA	NA	NA	NA	NA	NA	NA	2.61902	0.00285434	NA	NA	NA	NA	NA	NA	NA	NA	NA	NA	NA	NA	NA	NA	NA	NA
ENSG00000226359	AC055811.5	NA	NA	NA	NA	NA	NA	NA	NA	NA	NA	NA	NA	2.33591	0.00212015	NA	NA	2.19448	0.00507364	2.07594	0.00710682	NA	NA	NA	NA	NA	NA	NA	NA	NA	NA	NA	NA	NA	NA
ENSG00000226380	AC058791.1	0.887149	0.338783	NA	NA	2.17271	0.000569112	1.26233	0.0333505	0.971411	0.279812	3.03809	8.40997e-06	2.74642	2.7946e-05	0.567429	0.470625	1.40228	0.0123803	0.970747	0.0789337	-0.295788	0.71378	NA	NA	NA	NA	NA	NA	NA	NA	NA	NA	NA	NA
ENSG00000231721	AC058791.2	-0.0180986	0.985373	NA	NA	0.463374	0.190476	-0.862223	0.0177266	0.697328	0.168113	0.210047	0.56947	-0.927396	0.0112618	1.00163	0.0232468	1.17048	0.00196526	0.8448	0.02103	1.00217	0.0218188	NA	NA	NA	NA	NA	NA	NA	NA	NA	NA	NA	NA
ENSG00000222020	AC062017.1	NA	NA	NA	NA	NA	NA	NA	NA	NA	NA	NA	NA	NA	NA	NA	NA	2.0916	0.000409978	NA	NA	NA	NA	NA	NA	NA	NA	NA	NA	NA	NA	NA	NA	NA	NA
ENSG00000234028	AC062029.1	-0.019113	0.985309	NA	NA	2.21407	1.88896e-08	1.88342	2.99329e-07	0.182945	0.781376	1.61763	2.96256e-06	1.73236	1.04703e-06	0.244002	0.625242	2.5417	4.55409e-09	2.40773	1.20421e-08	0.887144	0.039967	NA	NA	NA	NA	NA	NA	NA	NA	NA	NA	NA	NA
ENSG00000248721	AC063976.6	0.0281066	0.973913	NA	NA	0.420733	0.179084	0.239067	0.45983	0.0691846	0.912604	0.796427	0.0088713	0.546978	0.0753345	-0.0614127	0.903819	-0.0994862	0.770061	-0.0748441	0.830873	-0.381345	0.329087	NA	NA	NA	NA	NA	NA	NA	NA	NA	NA	NA	NA
ENSG00000240115	AC064853.4	NA	NA	NA	NA	7.21791	9.69928e-09	6.5467	4.50405e-08	NA	NA	NA	NA	NA	NA	NA	NA	8.30131	3.29547e-07	7.92307	9.07374e-07	NA	NA	NA	NA	NA	NA	NA	NA	NA	NA	NA	NA	NA	NA
ENSG00000256929	AC067852.1	0.168735	0.790105	NA	NA	1.75294	1.08449e-09	1.66443	5.92352e-09	-0.193601	0.717155	1.52378	1.05731e-07	1.57218	3.77709e-08	-0.127477	0.77718	1.43008	7.83241e-07	1.54322	1.06298e-07	0.152555	0.730067	NA	NA	NA	NA	NA	NA	NA	NA	NA	NA	NA	NA
ENSG00000268055	AC067969.2	NA	NA	NA	NA	9.02305	1.82053e-07	9.40971	7.97237e-08	NA	NA	9.54886	5.97247e-08	9.87281	2.79331e-08	NA	NA	NA	NA	NA	NA	NA	NA	NA	NA	NA	NA	NA	NA	NA	NA	NA	NA	NA	NA
ENSG00000228389	AC068039.4	NA	NA	NA	NA	NA	NA	0.705126	0.132663	NA	NA	NA	NA	1.80666	0.000116809	NA	NA	0.941273	0.0436965	0.796794	0.082387	0.650991	0.234014	NA	NA	NA	NA	NA	NA	NA	NA	NA	NA	NA	NA
ENSG00000251485	AC068134.10	-0.69646	0.177635	NA	NA	-0.970397	0.0141525	0.258196	0.522271	-0.0458682	0.95339	0.347083	0.409817	0.617608	0.118979	0.234725	0.672487	0.228494	0.593656	0.621221	0.115498	-0.158814	0.783961	NA	NA	NA	NA	NA	NA	NA	NA	NA	NA	NA	NA
ENSG00000236682	AC068282.3	-1.52056	1.86895e-05	NA	NA	1.37819	2.02706e-05	0.758743	0.0202812	0.554302	0.232489	2.29784	1.48808e-09	1.86671	5.61636e-08	1.14196	0.00350764	4.63633	6.19579e-13	4.33172	2.43361e-12	NA	NA	NA	NA	NA	NA	NA	NA	NA	NA	NA	NA	NA	NA
ENSG00000172965	AC068491.1	0.394346	0.360197	NA	NA	-0.817401	0.00484889	-1.40102	1.70629e-05	0.270593	0.552381	-0.767975	0.00774422	-1.40647	1.5209e-05	0.451223	0.207489	-0.482816	0.0885254	-0.914779	0.00214735	0.196714	0.6058	NA	NA	NA	NA	NA	NA	NA	NA	NA	NA	NA	NA
ENSG00000249319	AC068533.7	0.0848447	0.877953	NA	NA	0.817159	0.000332061	0.945277	3.13068e-05	-0.233273	0.554339	1.0157	8.01355e-06	1.15818	3.46182e-07	0.0102852	0.981773	0.622164	0.00695142	0.612955	0.00807196	-0.0305427	0.937718	NA	NA	NA	NA	NA	NA	NA	NA	NA	NA	NA	NA
ENSG00000258725	AC068831.8	NA	NA	NA	NA	NA	NA	NA	NA	1.30215	0.0548557	NA	NA	NA	NA	0.719706	0.247014	NA	NA	NA	NA	NA	NA	NA	NA	NA	NA	NA	NA	NA	NA	NA	NA	NA	NA
ENSG00000224769	AC069213.1	-1.54533	0.107528	NA	NA	-0.0369273	0.959184	0.341888	0.607763	1.67422	0.0571704	NA	NA	1.99223	0.00580145	NA	NA	NA	NA	NA	NA	NA	NA	NA	NA	NA	NA	NA	NA	NA	NA	NA	NA	NA	NA
ENSG00000267242	AC069278.4	0.200036	0.814515	NA	NA	-0.743751	0.0827978	-0.774309	0.0617196	-0.0257767	0.975096	-0.812163	0.0542271	-0.950615	0.0212049	-0.174276	0.766246	0.556219	0.198878	-0.211513	0.649262	0.228247	0.694681	NA	NA	NA	NA	NA	NA	NA	NA	NA	NA	NA	NA
ENSG00000232495	AC069287.1	0.282083	0.49549	NA	NA	-0.0748729	0.7795	0.195579	0.440797	0.137799	0.762744	-0.268404	0.283951	-0.202068	0.422846	0.0577958	0.887479	-0.425459	0.0804574	-0.230965	0.366169	-0.0130016	0.974304	NA	NA	NA	NA	NA	NA	NA	NA	NA	NA	NA	NA
ENSG00000249240	AC069368.3	-0.593047	0.113383	NA	NA	0.146754	0.604951	0.180713	0.517815	0.0988436	0.852871	1.04111	0.000339148	1.02498	0.000412231	0.66481	0.0570144	1.10799	0.000201562	1.36544	1.69708e-05	0.406967	0.254627	NA	NA	NA	NA	NA	NA	NA	NA	NA	NA	NA	NA
ENSG00000242086	AC069513.3	-0.242754	0.533294	NA	NA	0.324652	0.147591	0.567024	0.00903152	0.543683	0.0794435	0.364592	0.102942	0.489867	0.0248042	0.234052	0.448831	0.515544	0.0194838	0.462262	0.0381131	0.100127	0.770344	NA	NA	NA	NA	NA	NA	NA	NA	NA	NA	NA	NA
ENSG00000229178	AC069513.4	NA	NA	NA	NA	NA	NA	NA	NA	NA	NA	NA	NA	NA	NA	NA	NA	0.453536	0.386396	0.197583	0.71488	NA	NA	NA	NA	NA	NA	NA	NA	NA	NA	NA	NA	NA	NA
ENSG00000231359	AC072052.7	NA	NA	NA	NA	NA	NA	5.20472	2.35123e-05	NA	NA	NA	NA	NA	NA	NA	NA	NA	NA	NA	NA	NA	NA	NA	NA	NA	NA	NA	NA	NA	NA	NA	NA	NA	NA
ENSG00000232732	AC073043.1	NA	NA	NA	NA	NA	NA	NA	NA	NA	NA	NA	NA	NA	NA	NA	NA	-2.53358	0.00407293	-2.61623	0.00267384	-0.0710442	0.946748	NA	NA	NA	NA	NA	NA	NA	NA	NA	NA	NA	NA
ENSG00000226124	AC073043.2	1.27393	0.0191825	NA	NA	2.56576	3.5593e-07	1.54724	0.00057421	NA	NA	1.45929	0.000311931	0.494394	0.255123	0.163163	0.80044	1.14583	0.00481878	0.662239	0.109689	0.988138	0.0277708	NA	NA	NA	NA	NA	NA	NA	NA	NA	NA	NA	NA
ENSG00000235499	AC073046.25	-0.0881834	0.939686	NA	NA	-0.812292	0.105336	-1.55539	0.00329615	-0.00207042	0.997673	-1.16767	0.0255737	-1.72328	0.00163914	0.474763	0.446312	-0.793931	0.130623	-0.942579	0.0719785	0.0588877	0.940712	NA	NA	NA	NA	NA	NA	NA	NA	NA	NA	NA	NA
ENSG00000228335	AC073063.10	-0.0967509	0.907029	NA	NA	-0.887034	0.0167916	-0.790509	0.0305794	-0.377561	0.505201	-0.66901	0.0761236	-0.656448	0.0772612	-0.308918	0.527785	-0.64486	0.0922307	-0.406311	0.299125	-0.217328	0.678145	NA	NA	NA	NA	NA	NA	NA	NA	NA	NA	NA	NA
ENSG00000179428	AC073072.5	NA	NA	NA	NA	4.85695	1.33625e-05	NA	NA	NA	NA	4.75502	5.74976e-06	4.4822	1.36445e-05	NA	NA	NA	NA	NA	NA	NA	NA	NA	NA	NA	NA	NA	NA	NA	NA	NA	NA	NA	NA
ENSG00000205011	AC073082.1	-0.921499	0.177672	NA	NA	-0.253577	0.611304	-0.766903	0.112794	-0.0409818	0.967712	NA	NA	NA	NA	0.818345	0.190829	NA	NA	0.174202	0.743211	NA	NA	NA	NA	NA	NA	NA	NA	NA	NA	NA	NA	NA	NA
ENSG00000237471	AC073115.6	NA	NA	NA	NA	4.55549	6.03521e-06	NA	NA	NA	NA	5.71164	8.26709e-07	NA	NA	NA	NA	10.262	7.20797e-08	8.83803	2.26873e-06	NA	NA	NA	NA	NA	NA	NA	NA	NA	NA	NA	NA	NA	NA
ENSG00000229628	AC073115.7	NA	NA	NA	NA	6.02763	4.2763e-06	NA	NA	NA	NA	5.84937	1.97959e-06	4.57544	8.50969e-05	NA	NA	8.19844	3.18217e-07	6.73617	1.34394e-05	NA	NA	NA	NA	NA	NA	NA	NA	NA	NA	NA	NA	NA	NA
ENSG00000237870	AC073130.1	NA	NA	NA	NA	5.80019	1.76419e-08	4.69602	7.08926e-07	NA	NA	4.20211	5.63304e-07	2.98798	7.81464e-05	NA	NA	4.34115	1.09233e-05	4.04722	3.42845e-05	NA	NA	NA	NA	NA	NA	NA	NA	NA	NA	NA	NA	NA	NA
ENSG00000243243	AC073130.3	NA	NA	NA	NA	NA	NA	NA	NA	NA	NA	4.05973	1.45658e-06	NA	NA	NA	NA	5.42014	3.13553e-09	5.09979	8.35059e-09	NA	NA	NA	NA	NA	NA	NA	NA	NA	NA	NA	NA	NA	NA
ENSG00000232783	AC073135.3	NA	NA	NA	NA	NA	NA	NA	NA	NA	NA	NA	NA	NA	NA	NA	NA	4.40013	4.83076e-05	NA	NA	NA	NA	NA	NA	NA	NA	NA	NA	NA	NA	NA	NA	NA	NA
ENSG00000233830	AC073150.4	-0.113848	0.880509	NA	NA	0.12482	0.735046	-0.203896	0.570513	-0.298773	0.586818	-0.0711661	0.851851	-0.119064	0.747471	-0.443321	0.297196	-0.243986	0.499804	-0.219892	0.548796	-0.399238	0.352638	NA	NA	NA	NA	NA	NA	NA	NA	NA	NA	NA	NA
ENSG00000198580	AC073343.1	NA	NA	NA	NA	3.188	1.60565e-08	2.68071	3.67243e-07	NA	NA	3.69255	1.82142e-09	3.41438	7.71463e-09	NA	NA	1.78283	1.1493e-05	1.52417	8.61771e-05	0.549485	0.251348	NA	NA	NA	NA	NA	NA	NA	NA	NA	NA	NA	NA
ENSG00000228010	AC073343.13	NA	NA	NA	NA	3.02913	2.73908e-07	2.78815	1.03472e-06	NA	NA	NA	NA	2.53718	4.42432e-06	NA	NA	1.92214	3.87848e-05	1.35239	0.00177433	0.971466	0.0554202	NA	NA	NA	NA	NA	NA	NA	NA	NA	NA	NA	NA
ENSG00000214194	AC073346.2	0.489607	0.101935	NA	NA	0.883741	5.33686e-05	0.727663	0.000925397	0.139203	0.742975	0.557106	0.0122462	0.422825	0.0590508	-0.0131952	0.975237	0.65688	0.0030824	0.899815	4.7807e-05	0.159301	0.620247	NA	NA	NA	NA	NA	NA	NA	NA	NA	NA	NA	NA
ENSG00000213148	AC073465.1	0.0907936	0.907911	NA	NA	1.41998	2.14271e-05	1.30869	7.11028e-05	-1.27293	0.00803739	1.33757	5.59539e-05	1.49656	9.2472e-06	-1.22323	0.00279371	0.898922	0.00925595	1.32919	9.64972e-05	-1.10298	0.00823118	NA	NA	NA	NA	NA	NA	NA	NA	NA	NA	NA	NA
ENSG00000233087	AC073869.1	-0.0824488	0.917394	NA	NA	-0.160456	0.668223	-0.429359	0.222003	0.410053	0.425791	-0.481927	0.177157	-0.875147	0.0108704	0.388005	0.377303	-0.640614	0.0684652	-0.802479	0.0213353	0.117978	0.822424	NA	NA	NA	NA	NA	NA	NA	NA	NA	NA	NA	NA
ENSG00000217950	AC073869.20	0.577172	0.345461	NA	NA	0.159223	0.735002	1.18008	0.00295756	-0.46969	0.485739	0.172689	0.699464	0.967965	0.0133278	-0.29615	0.59428	0.417374	0.333876	0.612907	0.138104	-0.971012	0.0449791	NA	NA	NA	NA	NA	NA	NA	NA	NA	NA	NA	NA
ENSG00000182648	AC073871.2	0.231817	0.733647	NA	NA	2.04314	8.4583e-10	1.54302	2.42293e-06	0.422571	0.415667	1.46482	8.07407e-06	1.38704	1.9941e-05	0.193057	0.689296	2.06907	7.4191e-10	1.59447	1.36102e-06	0.660295	0.0975772	NA	NA	NA	NA	NA	NA	NA	NA	NA	NA	NA	NA
ENSG00000226674	AC074093.1	1.78964	0.0766195	NA	NA	NA	NA	NA	NA	NA	NA	-1.02459	0.170581	-2.93928	0.000916916	0.130772	0.908359	0.429063	0.569092	-1.63189	0.0382874	0.888123	0.31934	NA	NA	NA	NA	NA	NA	NA	NA	NA	NA	NA	NA
ENSG00000234072	AC074117.10	0.0359267	0.967706	NA	NA	-0.214846	0.532659	0.228261	0.500562	0.0625878	0.924777	-0.0240481	0.947421	0.163514	0.635345	0.163637	0.725293	0.462451	0.163418	0.718978	0.0260929	0.537879	0.173654	NA	NA	NA	NA	NA	NA	NA	NA	NA	NA	NA	NA
ENSG00000225975	AC074138.3	-0.107609	0.904222	NA	NA	-0.504093	0.21704	0.458329	0.240191	0.339241	0.582132	0.290079	0.483857	0.631687	0.101491	0.633213	0.165944	-0.0910223	0.837191	0.54715	0.166727	0.402431	0.410779	NA	NA	NA	NA	NA	NA	NA	NA	NA	NA	NA	NA
ENSG00000177855	AC074182.1	0.0629254	0.945804	NA	NA	-0.89293	0.0193426	-0.713988	0.0580951	-0.513105	0.347466	-1.10174	0.00386666	-0.774695	0.0403657	-0.709073	0.109197	-1.01919	0.00799893	-0.66794	0.0829808	-0.853979	0.0499262	NA	NA	NA	NA	NA	NA	NA	NA	NA	NA	NA	NA
ENSG00000237452	AC074212.3	NA	NA	NA	NA	6.69759	2.81235e-07	6.64905	2.99213e-07	NA	NA	NA	NA	4.79386	5.88514e-06	NA	NA	5.55512	3.58809e-06	5.05844	1.52104e-05	NA	NA	NA	NA	NA	NA	NA	NA	NA	NA	NA	NA	NA	NA
ENSG00000267395	AC074212.6	-1.05833	0.146401	NA	NA	-0.034422	0.950002	-0.0112743	0.983968	-0.0421877	0.969	1.17875	0.026748	1.28204	0.0143374	1.42253	0.0299787	NA	NA	NA	NA	1.24096	0.0503759	NA	NA	NA	NA	NA	NA	NA	NA	NA	NA	NA	NA
ENSG00000213963	AC074286.1	-0.316288	0.55035	NA	NA	0.862744	0.00366452	0.649842	0.0300696	0.736856	0.0733409	0.860754	0.00428128	0.699848	0.0203505	0.626537	0.0900132	1.47857	1.01063e-06	1.15158	0.000129655	1.10132	0.00150269	NA	NA	NA	NA	NA	NA	NA	NA	NA	NA	NA	NA
ENSG00000225889	AC074289.1	NA	NA	NA	NA	NA	NA	7.80849	7.64737e-07	NA	NA	5.77051	4.44906e-07	5.35979	1.65817e-06	NA	NA	4.45123	6.5805e-07	3.4838	2.05913e-05	NA	NA	NA	NA	NA	NA	NA	NA	NA	NA	NA	NA	NA	NA
ENSG00000213985	AC078899.1	0.0877679	0.913496	NA	NA	-1.25745	0.000416235	-1.11702	0.00148303	-0.489288	0.343661	-0.971752	0.0065007	-1.26376	0.00032963	-0.394628	0.383115	-0.825129	0.0263401	-0.71351	0.055305	-0.79989	0.0638696	NA	NA	NA	NA	NA	NA	NA	NA	NA	NA	NA	NA
ENSG00000233611	AC079135.1	2.23528	0.00125021	NA	NA	NA	NA	NA	NA	NA	NA	-2.05633	0.000769164	-2.19474	0.000293224	-0.727607	0.23393	-2.51203	5.41556e-05	-2.44273	4.9167e-05	0.822436	0.120591	NA	NA	NA	NA	NA	NA	NA	NA	NA	NA	NA	NA
ENSG00000227210	AC079145.4	NA	NA	NA	NA	2.66662	0.000314031	NA	NA	NA	NA	NA	NA	NA	NA	NA	NA	NA	NA	NA	NA	NA	NA	NA	NA	NA	NA	NA	NA	NA	NA	NA	NA	NA	NA
ENSG00000269657	AC079210.1	NA	NA	NA	NA	NA	NA	0.835816	0.151253	NA	NA	NA	NA	NA	NA	NA	NA	NA	NA	NA	NA	NA	NA	NA	NA	NA	NA	NA	NA	NA	NA	NA	NA	NA	NA
ENSG00000204460	AC079586.1	NA	NA	NA	NA	NA	NA	NA	NA	NA	NA	NA	NA	NA	NA	NA	NA	3.42722	0.00108212	3.47949	0.000789841	NA	NA	NA	NA	NA	NA	NA	NA	NA	NA	NA	NA	NA	NA
ENSG00000242128	AC079767.2	-0.0751296	0.907911	NA	NA	0.909355	0.00067651	0.258769	0.364154	0.259274	0.573862	0.765929	0.00475747	0.415322	0.135501	0.245391	0.524942	1.16347	5.26676e-05	0.965068	0.000461032	0.275118	0.464518	NA	NA	NA	NA	NA	NA	NA	NA	NA	NA	NA	NA
ENSG00000233230	AC079807.2	-0.432591	0.704573	NA	NA	-0.885402	0.146267	-0.822299	0.168901	0.151942	0.89318	0.263319	0.676879	0.101694	0.875904	NA	NA	1.7897	0.00548615	1.42157	0.0252144	NA	NA	NA	NA	NA	NA	NA	NA	NA	NA	NA	NA	NA	NA
ENSG00000231747	AC079922.2	0.125342	0.904023	NA	NA	0.939299	0.0304719	1.64685	0.000220362	1.49169	0.0156872	1.2651	0.003193	1.17724	0.00509882	1.81127	0.00103645	0.309748	0.486767	0.15959	0.728529	0.608621	0.211666	NA	NA	NA	NA	NA	NA	NA	NA	NA	NA	NA	NA
ENSG00000237753	AC079922.3	0.427778	0.464973	NA	NA	0.296927	0.447169	-0.498669	0.188032	0.652349	0.191624	-0.617592	0.100274	-0.817387	0.0255011	0.133539	0.806339	0.146489	0.72052	-0.360403	0.359097	0.256985	0.606083	NA	NA	NA	NA	NA	NA	NA	NA	NA	NA	NA	NA
ENSG00000203644	AC083799.1	0.191029	0.792674	NA	NA	0.0674948	0.857713	-0.474361	0.168858	0.141896	0.826659	0.039364	0.917239	-0.414036	0.231	0.37243	0.409029	-0.235301	0.511063	-0.361104	0.301707	-0.102241	0.842806	NA	NA	NA	NA	NA	NA	NA	NA	NA	NA	NA	NA
ENSG00000259820	AC083843.1	0.0395766	0.966356	NA	NA	1.05877	0.00155451	0.679607	0.0453108	-0.127574	0.847401	0.682974	0.047536	0.4824	0.164486	0.239886	0.615442	0.298746	0.401783	0.25559	0.48192	-0.207265	0.666221	NA	NA	NA	NA	NA	NA	NA	NA	NA	NA	NA	NA
ENSG00000237821	AC083873.4	-0.0486916	0.965277	NA	NA	-0.144303	0.764428	-0.195677	0.671675	-0.0552118	0.949551	0.0988632	0.837955	0.0446388	0.928506	-0.052194	0.941392	0.236071	0.65619	0.336463	0.505928	NA	NA	NA	NA	NA	NA	NA	NA	NA	NA	NA	NA	NA	NA
ENSG00000204745	AC083899.3	0.234239	0.763045	NA	NA	-1.15899	0.00420163	-0.778829	0.0486436	-0.194908	0.7815	-1.20987	0.0024918	-0.672173	0.0892033	-0.912781	0.0429702	-1.06794	0.00633228	-1.08119	0.00505378	-0.663467	0.141932	NA	NA	NA	NA	NA	NA	NA	NA	NA	NA	NA	NA
ENSG00000212694	AC084018.1	-0.651744	0.155046	NA	NA	-2.16382	4.4207e-07	-2.99894	3.22676e-09	0.487352	0.329114	-2.35116	1.72651e-07	-2.92635	6.01637e-09	0.709443	0.0910247	-1.14279	0.00150518	-1.43345	0.000159343	1.05101	0.0112515	NA	NA	NA	NA	NA	NA	NA	NA	NA	NA	NA	NA
ENSG00000256006	AC084117.3	NA	NA	NA	NA	NA	NA	NA	NA	NA	NA	NA	NA	NA	NA	NA	NA	1.10875	0.134699	1.11359	0.126876	NA	NA	NA	NA	NA	NA	NA	NA	NA	NA	NA	NA	NA	NA
ENSG00000232600	AC084125.4	-0.523847	0.546752	NA	NA	0.830605	0.0883895	-0.237089	0.650602	0.621302	0.399693	0.427232	0.421063	NA	NA	1.26309	0.0386245	NA	NA	NA	NA	NA	NA	NA	NA	NA	NA	NA	NA	NA	NA	NA	NA	NA	NA
ENSG00000186019	AC084219.4	-0.461426	0.425753	NA	NA	1.62031	3.5081e-05	2.02335	1.65386e-06	0.140582	0.83793	2.02506	2.00936e-06	2.30846	2.59665e-07	0.126612	0.825269	1.59436	5.13881e-05	1.83077	9.2129e-06	0.221938	0.657817	NA	NA	NA	NA	NA	NA	NA	NA	NA	NA	NA	NA
ENSG00000176305	AC087269.1	NA	NA	NA	NA	10.1382	2.5815e-11	8.81254	1.30383e-09	NA	NA	6.55992	4.33773e-11	5.80069	3.92609e-10	NA	NA	2.82165	1.7215e-07	2.10063	9.54837e-06	-0.0826633	0.893678	NA	NA	NA	NA	NA	NA	NA	NA	NA	NA	NA	NA
ENSG00000235530	AC087294.2	0.368829	0.63889	NA	NA	-1.30542	0.00893789	-0.448868	0.33056	-0.0222606	0.980834	-1.35586	0.00524448	-0.79802	0.0724433	-0.43418	0.44854	-1.39247	0.00632387	-1.21254	0.0130329	-0.0112518	0.986779	NA	NA	NA	NA	NA	NA	NA	NA	NA	NA	NA	NA
ENSG00000213165	AC090425.1	-0.569912	0.352111	NA	NA	0.477948	0.249285	1.24378	0.00139284	0.299117	0.653184	1.24623	0.00202907	1.46219	0.000357354	0.0864581	0.897422	0.346478	0.429526	0.961625	0.0164003	0.217366	0.710857	NA	NA	NA	NA	NA	NA	NA	NA	NA	NA	NA	NA
ENSG00000250404	AC090587.2	-0.156919	0.852949	NA	NA	-0.470226	0.246117	-0.470509	0.235188	0.302211	0.627014	-0.479407	0.241637	-0.12988	0.761954	0.420256	0.387016	-0.165934	0.726343	-0.13806	0.771665	1.18152	0.00857593	NA	NA	NA	NA	NA	NA	NA	NA	NA	NA	NA	NA
ENSG00000229368	AC090587.4	-0.125496	0.896944	NA	NA	1.1341	0.00565361	0.566184	0.168022	-0.738822	0.244733	0.398935	0.360849	0.343704	0.428175	-0.404341	0.483052	-0.0156883	0.974574	-0.0823936	0.86633	-0.95889	0.0768861	NA	NA	NA	NA	NA	NA	NA	NA	NA	NA	NA	NA
ENSG00000241061	AC090602.1	NA	NA	NA	NA	NA	NA	NA	NA	NA	NA	NA	NA	NA	NA	0.270531	0.67251	NA	NA	NA	NA	NA	NA	NA	NA	NA	NA	NA	NA	NA	NA	NA	NA	NA	NA
ENSG00000214708	AC090616.2	NA	NA	NA	NA	NA	NA	NA	NA	NA	NA	NA	NA	NA	NA	NA	NA	-0.133799	0.796511	-0.570449	0.232709	0.616378	0.269931	NA	NA	NA	NA	NA	NA	NA	NA	NA	NA	NA	NA
ENSG00000224728	AC090945.1	0.057717	0.961173	NA	NA	0.362135	0.426458	-0.246235	0.600347	0.558085	0.41013	0.332021	0.467527	-0.0808613	0.868251	0.707079	0.20005	2.48576	2.25988e-05	2.18348	0.000119549	1.86208	0.00477055	NA	NA	NA	NA	NA	NA	NA	NA	NA	NA	NA	NA
ENSG00000256586	AC091171.1	-0.1964	0.687638	NA	NA	-0.897353	0.000210188	-1.18689	1.04357e-06	0.165915	0.717083	-0.671548	0.0062191	-1.04347	1.6671e-05	0.292443	0.389784	-0.746916	0.00226641	-1.05938	1.49751e-05	0.34496	0.279006	NA	NA	NA	NA	NA	NA	NA	NA	NA	NA	NA	NA
ENSG00000229043	AC091729.9	-0.284398	0.655138	NA	NA	-0.0777045	0.839911	-0.0013717	0.997595	0.210582	0.729113	-0.248516	0.511031	0.00582344	0.988148	0.265994	0.576448	0.608871	0.0818536	0.47432	0.184358	0.664329	0.104201	NA	NA	NA	NA	NA	NA	NA	NA	NA	NA	NA	NA
ENSG00000239652	AC091736.10	NA	NA	NA	NA	4.00562	5.33572e-06	3.12911	0.00019472	NA	NA	3.20037	5.3459e-05	NA	NA	NA	NA	NA	NA	NA	NA	NA	NA	NA	NA	NA	NA	NA	NA	NA	NA	NA	NA	NA	NA
ENSG00000217455	AC091801.1	NA	NA	NA	NA	NA	NA	NA	NA	NA	NA	NA	NA	NA	NA	NA	NA	2.90819	0.000383177	2.37572	0.00220186	NA	NA	NA	NA	NA	NA	NA	NA	NA	NA	NA	NA	NA	NA
ENSG00000215196	AC091878.1	-1.01999	0.0636457	NA	NA	0.391964	0.346961	-0.446713	0.28308	0.447342	0.482237	0.289702	0.523717	-0.507756	0.258602	0.38603	0.513035	1.51919	0.00200109	1.11307	0.0203185	NA	NA	NA	NA	NA	NA	NA	NA	NA	NA	NA	NA	NA	NA
ENSG00000256390	AC092143.1	-0.498596	0.271068	NA	NA	-1.40566	6.7507e-06	-1.62636	8.84052e-07	0.166602	0.772636	-1.47636	4.38036e-06	-1.77833	2.73318e-07	0.174758	0.70068	-0.363475	0.277184	-0.863733	0.00694625	0.0839021	0.869294	NA	NA	NA	NA	NA	NA	NA	NA	NA	NA	NA	NA
ENSG00000234432	AC092171.1	-1.12385	0.117774	NA	NA	-3.08352	3.4812e-05	-2.85219	4.41695e-05	-0.323934	0.721922	NA	NA	NA	NA	NA	NA	NA	NA	NA	NA	NA	NA	NA	NA	NA	NA	NA	NA	NA	NA	NA	NA	NA	NA
ENSG00000233527	AC092295.7	0.174188	0.819572	NA	NA	-0.629552	0.0841681	-0.49669	0.171466	0.435704	0.41013	-0.872016	0.0155316	-0.978334	0.00563416	0.40717	0.363136	-0.786594	0.0296452	-0.671486	0.065163	0.376584	0.407861	NA	NA	NA	NA	NA	NA	NA	NA	NA	NA	NA	NA
ENSG00000234198	AC092431.1	0.154147	0.856978	NA	NA	1.56181	1.82994e-05	1.56705	1.4322e-05	0.0718497	0.926939	1.33728	0.000233485	1.08725	0.00272144	0.443456	0.352071	2.04986	9.00824e-08	1.99725	1.69889e-07	1.50492	0.000400784	NA	NA	NA	NA	NA	NA	NA	NA	NA	NA	NA	NA
ENSG00000227189	AC092535.3	NA	NA	NA	NA	NA	NA	0.656296	0.150441	0.493764	0.500173	NA	NA	0.490851	0.309034	0.814628	0.165126	NA	NA	NA	NA	NA	NA	NA	NA	NA	NA	NA	NA	NA	NA	NA	NA	NA	NA
ENSG00000236204	AC092594.1	NA	NA	NA	NA	3.35341	2.63789e-07	2.85178	3.76199e-06	1.91847	0.0168878	1.64505	0.00103042	1.4968	0.0024191	0.404697	0.552273	2.64973	6.28742e-06	2.26739	5.17034e-05	1.64708	0.00865595	NA	NA	NA	NA	NA	NA	NA	NA	NA	NA	NA	NA
ENSG00000213935	AC092610.12	0.200362	0.812401	NA	NA	-0.663882	0.11909	-0.45776	0.274163	0.133221	0.860559	-0.395454	0.355842	-0.544957	0.189073	0.0380105	0.953964	-0.418298	0.361944	-0.750414	0.0872263	0.456229	0.37802	NA	NA	NA	NA	NA	NA	NA	NA	NA	NA	NA	NA
ENSG00000227542	AC092614.2	0.338086	0.660894	NA	NA	-0.565791	0.226955	-1.08134	0.015616	-0.0200374	0.982254	-1.30264	0.00379213	-2.08074	1.09337e-05	0.125723	0.844399	NA	NA	NA	NA	NA	NA	NA	NA	NA	NA	NA	NA	NA	NA	NA	NA	NA	NA
ENSG00000241772	AC092620.2	-0.0469652	0.959498	NA	NA	-0.469497	0.197836	-1.05274	0.0036226	-0.0716834	0.919694	-0.592396	0.103163	-0.451561	0.212263	0.294837	0.530917	-0.251706	0.506584	-0.577078	0.110682	0.10874	0.841103	NA	NA	NA	NA	NA	NA	NA	NA	NA	NA	NA	NA
ENSG00000213492	AC092661.2	-0.104495	0.909303	NA	NA	-0.32985	0.456691	-0.123328	0.783154	-0.119224	0.876226	-0.0936312	0.841601	0.13929	0.756914	-0.255177	0.654301	-0.772772	0.0708648	-0.68542	0.102787	-0.555097	0.267088	NA	NA	NA	NA	NA	NA	NA	NA	NA	NA	NA	NA
ENSG00000230393	AC092667.2	0.667001	0.271885	NA	NA	0.27994	0.51799	-0.128592	0.774908	-0.206045	0.794295	-0.584729	0.161693	-1.10715	0.00989439	-0.588452	0.264696	0.518285	0.222354	0.197402	0.662234	0.454042	0.40406	NA	NA	NA	NA	NA	NA	NA	NA	NA	NA	NA	NA
ENSG00000233757	AC092835.2	-0.0183421	0.985373	NA	NA	-0.174379	0.653598	0.0732107	0.852098	0.097209	0.88667	-0.140663	0.721739	0.202966	0.59144	-0.298746	0.533569	0.127921	0.746633	-0.0413467	0.92008	0.10088	0.854887	NA	NA	NA	NA	NA	NA	NA	NA	NA	NA	NA	NA
ENSG00000170846	AC093323.3	-0.0389615	0.954813	NA	NA	-0.530601	0.035447	-0.120811	0.660744	0.191072	0.672083	-0.356595	0.169685	-0.225535	0.393871	-0.0585946	0.89174	0.37707	0.143693	0.0688517	0.811495	-0.0320229	0.939738	NA	NA	NA	NA	NA	NA	NA	NA	NA	NA	NA	NA
ENSG00000231890	AC093391.2	NA	NA	NA	NA	1.68804	0.00684203	NA	NA	0.623552	0.546052	NA	NA	NA	NA	0.585175	0.507703	0.769247	0.164453	0.224582	0.703785	-0.314378	0.689637	NA	NA	NA	NA	NA	NA	NA	NA	NA	NA	NA	NA
ENSG00000235257	AC093415.2	0.633203	0.170325	NA	NA	-4.41696	5.01724e-12	-2.97078	9.02994e-10	0.393353	0.460722	-2.72498	2.39563e-09	-2.75923	1.71735e-09	0.325197	0.473016	-2.30076	1.34093e-07	-1.41604	0.000133972	1.1071	0.00565586	NA	NA	NA	NA	NA	NA	NA	NA	NA	NA	NA	NA
ENSG00000239203	AC093484.4	NA	NA	NA	NA	NA	NA	NA	NA	NA	NA	NA	NA	NA	NA	NA	NA	NA	NA	NA	NA	0.372789	0.593254	NA	NA	NA	NA	NA	NA	NA	NA	NA	NA	NA	NA
ENSG00000255647	AC093510.1	NA	NA	NA	NA	NA	NA	4.00844	7.54621e-05	NA	NA	NA	NA	NA	NA	NA	NA	1.81778	0.0240281	NA	NA	NA	NA	NA	NA	NA	NA	NA	NA	NA	NA	NA	NA	NA	NA
ENSG00000234231	AC093616.4	0.0331484	0.969324	NA	NA	-1.91067	1.13464e-06	-2.39716	3.94906e-08	-0.0720017	0.907336	-1.49485	3.33487e-05	-2.16084	1.85624e-07	0.460149	0.243683	-0.882549	0.00586564	-1.33414	0.000122566	0.15386	0.734953	NA	NA	NA	NA	NA	NA	NA	NA	NA	NA	NA	NA
ENSG00000242474	AC093627.9	0.165017	0.867013	NA	NA	NA	NA	NA	NA	NA	NA	-0.171953	0.731142	-0.805658	0.0851825	-0.0742466	0.916958	0.864174	0.0696274	0.254797	0.619455	NA	NA	NA	NA	NA	NA	NA	NA	NA	NA	NA	NA	NA	NA
ENSG00000237940	AC093642.3	NA	NA	NA	NA	NA	NA	NA	NA	NA	NA	NA	NA	NA	NA	NA	NA	NA	NA	3.42825	0.000523053	NA	NA	NA	NA	NA	NA	NA	NA	NA	NA	NA	NA	NA	NA
ENSG00000220804	AC093642.5	-0.307978	0.660894	NA	NA	-0.178993	0.669394	-0.315198	0.431815	0.23285	0.724148	-0.0325997	0.941664	-0.0845839	0.846226	0.360511	0.472621	0.420411	0.284893	0.0855239	0.843976	0.29358	0.554248	NA	NA	NA	NA	NA	NA	NA	NA	NA	NA	NA	NA
ENSG00000256604	AC093668.3	0.537928	0.449005	NA	NA	NA	NA	0.598464	0.189018	NA	NA	-0.491717	0.301904	-0.633244	0.170506	0.201336	0.747405	NA	NA	NA	NA	0.319563	0.61358	NA	NA	NA	NA	NA	NA	NA	NA	NA	NA	NA	NA
ENSG00000232533	AC093673.5	0.329912	0.497456	NA	NA	-0.185165	0.550317	-0.829969	0.00347423	-0.17614	0.739333	-0.535813	0.0672144	-1.10205	0.000100264	-0.145203	0.738399	-0.275918	0.368303	-0.513486	0.0826273	0.172815	0.684392	NA	NA	NA	NA	NA	NA	NA	NA	NA	NA	NA	NA
ENSG00000231156	AC093702.1	0.0965107	0.950147	NA	NA	-0.341895	0.605939	-1.24708	0.0588803	-0.201512	0.867474	-1.3665	0.0453547	-1.35044	0.0412991	-0.0107486	0.992626	NA	NA	NA	NA	NA	NA	NA	NA	NA	NA	NA	NA	NA	NA	NA	NA	NA	NA
ENSG00000213222	AC093724.2	1.14368	0.00743295	NA	NA	-0.982727	0.0187854	-0.065583	0.88252	-0.625126	0.275897	-1.58836	5.03482e-05	-0.615869	0.111782	-1.36875	0.00171857	-1.32774	0.000867913	-0.936657	0.0169347	-1.38053	0.00148388	NA	NA	NA	NA	NA	NA	NA	NA	NA	NA	NA	NA
ENSG00000214106	AC093726.6	-1.44436	1.4105e-05	NA	NA	-0.555108	0.0801354	-0.501358	0.114535	0.260551	0.618319	0.471732	0.154065	0.652093	0.041859	0.923547	0.0120233	0.447729	0.17309	0.630538	0.0501448	0.927428	0.0109117	NA	NA	NA	NA	NA	NA	NA	NA	NA	NA	NA	NA
ENSG00000256005	AC093734.1	0.355493	0.274377	NA	NA	2.29981	1.08742e-11	1.88609	4.44517e-10	-0.15038	0.707596	1.92537	3.16066e-10	1.67041	3.80384e-09	0.341809	0.228972	0.961077	2.6848e-05	0.667652	0.00173648	0.00203987	0.995177	NA	NA	NA	NA	NA	NA	NA	NA	NA	NA	NA	NA
ENSG00000225205	AC093818.1	0.280876	0.807655	NA	NA	NA	NA	NA	NA	NA	NA	0.0303483	0.957973	-0.69213	0.204634	-0.189103	0.817185	-2.48572	1.40267e-05	-2.33201	2.71172e-05	-0.972472	0.0768861	NA	NA	NA	NA	NA	NA	NA	NA	NA	NA	NA	NA
ENSG00000152117	AC093838.4	-0.00589479	0.994072	NA	NA	-1.13307	1.19107e-05	-0.800696	0.00203364	0.28082	0.51641	-1.14626	1.07001e-05	-0.908107	0.000458912	0.269155	0.463004	-0.983697	0.000151926	-1.16189	8.62522e-06	-0.187064	0.618365	NA	NA	NA	NA	NA	NA	NA	NA	NA	NA	NA	NA
ENSG00000226856	AC093901.1	NA	NA	NA	NA	NA	NA	NA	NA	NA	NA	NA	NA	NA	NA	NA	NA	2.97521	8.72573e-05	1.82374	0.0100503	NA	NA	NA	NA	NA	NA	NA	NA	NA	NA	NA	NA	NA	NA
ENSG00000236078	AC095067.1	NA	NA	NA	NA	NA	NA	NA	NA	NA	NA	5.99852	9.27655e-07	NA	NA	NA	NA	7.02825	8.69686e-10	4.71419	6.32564e-07	NA	NA	NA	NA	NA	NA	NA	NA	NA	NA	NA	NA	NA	NA
ENSG00000224184	AC096559.1	NA	NA	NA	NA	NA	NA	NA	NA	NA	NA	NA	NA	NA	NA	NA	NA	2.42285	7.58145e-05	1.58923	0.00443133	NA	NA	NA	NA	NA	NA	NA	NA	NA	NA	NA	NA	NA	NA
ENSG00000234536	AC096582.7	NA	NA	NA	NA	1.86429	0.00140201	1.5259	0.00707361	NA	NA	NA	NA	NA	NA	NA	NA	NA	NA	NA	NA	NA	NA	NA	NA	NA	NA	NA	NA	NA	NA	NA	NA	NA	NA
ENSG00000269690	AC096677.1	-0.353396	0.518885	NA	NA	-1.62	2.34518e-05	-2.03668	9.41179e-07	-0.473417	0.336802	-0.771006	0.0223217	-1.08396	0.00175485	-0.192076	0.683299	-1.33995	0.00026649	-1.47683	9.24408e-05	-1.03682	0.0112609	NA	NA	NA	NA	NA	NA	NA	NA	NA	NA	NA	NA
ENSG00000244567	AC096772.6	-0.35348	0.509079	NA	NA	1.14585	0.00020643	1.47397	1.79533e-06	0.674336	0.11727	1.04337	0.000901082	1.39582	7.36731e-06	0.910097	0.0130109	1.33422	2.74788e-05	1.43071	7.05218e-06	1.1952	0.000982771	NA	NA	NA	NA	NA	NA	NA	NA	NA	NA	NA	NA
ENSG00000176354	AC097359.1	0.863395	0.124793	NA	NA	-2.79576	1.91829e-06	-2.84068	1.27068e-06	-0.469008	0.488934	-2.98059	3.93168e-07	-3.90196	9.23885e-09	-0.53743	0.31499	-2.85606	7.37935e-07	-3.16556	1.88947e-07	-0.476153	0.371251	NA	NA	NA	NA	NA	NA	NA	NA	NA	NA	NA	NA
ENSG00000259848	AC097374.2	NA	NA	NA	NA	NA	NA	NA	NA	NA	NA	NA	NA	NA	NA	NA	NA	4.93404	5.75994e-05	NA	NA	NA	NA	NA	NA	NA	NA	NA	NA	NA	NA	NA	NA	NA	NA
ENSG00000237877	AC097500.2	NA	NA	NA	NA	NA	NA	NA	NA	0.633209	0.386024	NA	NA	NA	NA	NA	NA	NA	NA	NA	NA	1.14404	0.0640936	NA	NA	NA	NA	NA	NA	NA	NA	NA	NA	NA	NA
ENSG00000234645	AC097523.2	0.867645	0.114718	NA	NA	-0.769632	0.122065	-0.711575	0.135878	-0.95067	0.152205	-1.51591	0.00103366	-1.7621	0.000179147	-1.12916	0.0270835	NA	NA	NA	NA	0.592578	0.28374	NA	NA	NA	NA	NA	NA	NA	NA	NA	NA	NA	NA
ENSG00000236432	AC097662.2	-0.51932	0.398496	NA	NA	-0.52297	0.218622	-0.755757	0.0636468	0.546526	0.331599	-0.299525	0.509634	-0.840325	0.0503419	0.413781	0.429928	0.145776	0.765338	-0.507145	0.267636	0.392577	0.47415	NA	NA	NA	NA	NA	NA	NA	NA	NA	NA	NA	NA
ENSG00000226833	AC097724.3	NA	NA	NA	NA	NA	NA	NA	NA	NA	NA	NA	NA	NA	NA	NA	NA	1.99127	0.000461681	NA	NA	NA	NA	NA	NA	NA	NA	NA	NA	NA	NA	NA	NA	NA	NA
ENSG00000213846	AC098614.2	-0.324479	0.478613	NA	NA	-0.758462	0.00457988	-1.61718	2.96021e-07	-0.302137	0.492181	-1.05875	0.00010983	-1.58539	4.10025e-07	-0.152785	0.70791	-0.472951	0.090655	-0.853244	0.00179546	-0.241757	0.524683	NA	NA	NA	NA	NA	NA	NA	NA	NA	NA	NA	NA
ENSG00000233766	AC098617.1	NA	NA	NA	NA	2.41522	1.20251e-05	NA	NA	NA	NA	3.26858	1.09169e-07	3.05578	3.0195e-07	NA	NA	2.761	8.54726e-06	2.20309	0.000186112	NA	NA	NA	NA	NA	NA	NA	NA	NA	NA	NA	NA	NA	NA
ENSG00000232485	AC098820.3	-0.248971	0.783482	NA	NA	2.07053	3.81241e-06	1.42176	0.000464381	-0.541708	0.418834	2.15973	2.55205e-06	2.07033	4.51196e-06	0.415537	0.46155	2.47762	5.92528e-07	1.92631	2.32271e-05	0.870093	0.0928527	NA	NA	NA	NA	NA	NA	NA	NA	NA	NA	NA	NA
ENSG00000241520	AC098820.4	NA	NA	NA	NA	NA	NA	NA	NA	NA	NA	NA	NA	NA	NA	NA	NA	NA	NA	3.57286	3.67084e-05	NA	NA	NA	NA	NA	NA	NA	NA	NA	NA	NA	NA	NA	NA
ENSG00000183900	AC099522.1	0.536898	0.373543	NA	NA	0.496138	0.205135	-0.494666	0.205223	0.00935009	0.991646	0.0989726	0.81216	-0.790614	0.0420717	-0.187733	0.745025	-0.358627	0.360628	-0.936874	0.017728	-1.60541	0.00127467	NA	NA	NA	NA	NA	NA	NA	NA	NA	NA	NA	NA
ENSG00000217825	AC099552.4	NA	NA	NA	NA	8.32929	3.11569e-07	8.28998	2.94827e-07	NA	NA	5.90494	4.9419e-07	5.58019	1.14607e-06	NA	NA	5.2218	5.53491e-06	NA	NA	NA	NA	NA	NA	NA	NA	NA	NA	NA	NA	NA	NA	NA	NA
ENSG00000259970	AC099668.5	-0.640581	0.355759	NA	NA	0.494275	0.259443	0.0807025	0.863246	1.14939	0.0581094	0.584865	0.202265	0.140468	0.773919	1.45525	0.00954735	0.689205	0.141894	NA	NA	1.53402	0.00693383	NA	NA	NA	NA	NA	NA	NA	NA	NA	NA	NA	NA
ENSG00000224738	AC099850.1	0.162907	0.853036	NA	NA	-1.17123	0.006562	-1.49122	0.000839575	-0.0242538	0.976754	-0.481257	0.243169	-1.22236	0.00403107	-0.205181	0.72028	-0.0720885	0.878032	-0.399201	0.357018	-0.340764	0.535442	NA	NA	NA	NA	NA	NA	NA	NA	NA	NA	NA	NA
ENSG00000184247	AC100791.1	-0.537144	0.229234	NA	NA	1.97773	1.05336e-07	2.35324	5.42826e-09	0.158695	0.785636	2.60365	1.33766e-09	2.81842	2.83022e-10	0.563937	0.146772	1.72097	1.56569e-06	1.77739	1.0679e-06	0.439912	0.278607	NA	NA	NA	NA	NA	NA	NA	NA	NA	NA	NA	NA
ENSG00000225151	AC103965.1	-0.232494	0.746388	NA	NA	1.39722	5.4963e-05	1.48088	2.38478e-05	-0.988924	0.0456697	1.4168	5.49024e-05	1.93433	5.22806e-07	-0.707407	0.109519	1.58429	8.95329e-06	1.52791	1.57937e-05	-0.44499	0.306165	NA	NA	NA	NA	NA	NA	NA	NA	NA	NA	NA	NA
ENSG00000213383	AC104297.1	0.306812	0.677293	NA	NA	0.387507	0.357654	0.528593	0.18919	-0.146063	0.849373	0.0487943	0.913284	0.192421	0.65023	-0.141604	0.811985	-0.456622	0.27012	-0.173434	0.690104	-0.331882	0.516588	NA	NA	NA	NA	NA	NA	NA	NA	NA	NA	NA	NA
ENSG00000167355	AC104389.28	NA	NA	NA	NA	2.38293	3.9457e-05	2.54197	1.23425e-05	NA	NA	2.8073	1.38044e-07	2.94829	5.8051e-08	NA	NA	NA	NA	3.49467	1.49447e-05	NA	NA	NA	NA	NA	NA	NA	NA	NA	NA	NA	NA	NA	NA
ENSG00000267314	AC104532.2	-0.594494	0.518885	NA	NA	-0.370446	0.499089	0.421368	0.431058	0.561122	0.511326	0.0861151	0.882741	0.610576	0.255379	1.27828	0.0609087	1.09953	0.0669954	1.87894	0.00234302	1.38218	0.0674885	NA	NA	NA	NA	NA	NA	NA	NA	NA	NA	NA	NA
ENSG00000268756	AC104534.2	NA	NA	NA	NA	NA	NA	NA	NA	NA	NA	NA	NA	5.76353	4.52789e-05	NA	NA	NA	NA	NA	NA	NA	NA	NA	NA	NA	NA	NA	NA	NA	NA	NA	NA	NA	NA
ENSG00000268083	AC104534.3	0.159597	0.708309	NA	NA	-1.4559	3.76829e-10	-1.85067	3.43899e-12	-0.787535	0.00684329	-1.48901	2.53354e-10	-1.7775	6.77865e-12	-0.726658	0.00407772	-1.34209	2.75742e-09	-1.60985	1.08377e-10	-0.591014	0.0176121	NA	NA	NA	NA	NA	NA	NA	NA	NA	NA	NA	NA
ENSG00000236307	AC104651.1	NA	NA	NA	NA	2.08617	0.000416181	NA	NA	NA	NA	NA	NA	1.38812	0.00625141	NA	NA	NA	NA	NA	NA	NA	NA	NA	NA	NA	NA	NA	NA	NA	NA	NA	NA	NA	NA
ENSG00000226508	AC104655.3	NA	NA	NA	NA	NA	NA	NA	NA	NA	NA	NA	NA	NA	NA	NA	NA	6.20568	4.58346e-06	5.65634	1.63339e-05	NA	NA	NA	NA	NA	NA	NA	NA	NA	NA	NA	NA	NA	NA
ENSG00000229951	AC104695.3	-0.483545	0.629472	NA	NA	-0.661214	0.24673	-1.10972	0.0526716	1.03639	0.170145	NA	NA	NA	NA	1.05916	0.117692	NA	NA	NA	NA	2.30432	0.00406452	NA	NA	NA	NA	NA	NA	NA	NA	NA	NA	NA	NA
ENSG00000256261	AC104698.1	-0.010504	0.992649	NA	NA	0.594235	0.136512	-0.25001	0.541668	0.622882	0.293066	0.204688	0.624021	-0.443618	0.26523	1.41043	0.00730214	0.168293	0.693148	-0.26826	0.526043	0.541766	0.281151	NA	NA	NA	NA	NA	NA	NA	NA	NA	NA	NA	NA
ENSG00000236651	AC104801.1	NA	NA	NA	NA	NA	NA	1.50875	0.00301936	NA	NA	NA	NA	NA	NA	NA	NA	NA	NA	NA	NA	NA	NA	NA	NA	NA	NA	NA	NA	NA	NA	NA	NA	NA	NA
ENSG00000226321	AC104809.3	NA	NA	NA	NA	4.9717	8.25407e-08	4.02941	2.9592e-06	NA	NA	3.34284	3.94337e-05	3.06451	0.000113879	NA	NA	2.81187	0.000451704	NA	NA	NA	NA	NA	NA	NA	NA	NA	NA	NA	NA	NA	NA	NA	NA
ENSG00000268485	AC104841.2	NA	NA	NA	NA	3.5814	3.4147e-07	2.73009	2.2395e-05	NA	NA	2.6165	2.30695e-05	NA	NA	NA	NA	-0.758887	0.128152	-1.27066	0.0130382	-0.66977	0.271449	NA	NA	NA	NA	NA	NA	NA	NA	NA	NA	NA	NA
ENSG00000203392	AC105020.1	-0.534826	0.622464	NA	NA	-1.56899	0.0135049	-1.66247	0.00910963	0.996993	0.246691	0.107317	0.869005	-0.976598	0.116478	1.59761	0.0337711	0.786312	0.204207	1.21032	0.0504965	1.65866	0.0282844	NA	NA	NA	NA	NA	NA	NA	NA	NA	NA	NA	NA
ENSG00000177725	AC105206.1	0.113473	0.934967	NA	NA	1.67074	0.00293695	NA	NA	NA	NA	1.30205	0.0176094	0.59561	0.27646	-0.227561	0.793493	0.969292	0.0721168	0.415697	0.459409	NA	NA	NA	NA	NA	NA	NA	NA	NA	NA	NA	NA	NA	NA
ENSG00000238062	AC105344.2	NA	NA	NA	NA	NA	NA	NA	NA	NA	NA	NA	NA	NA	NA	NA	NA	3.08313	0.00018382	NA	NA	NA	NA	NA	NA	NA	NA	NA	NA	NA	NA	NA	NA	NA	NA
ENSG00000227252	AC105760.2	0.434847	0.47088	NA	NA	1.83023	6.4788e-06	2.12887	7.14502e-07	0.147044	0.838761	1.70202	1.41347e-05	1.84622	4.36764e-06	0.0116026	0.986694	2.22842	4.52653e-07	2.18222	6.69217e-07	0.417927	0.388532	NA	NA	NA	NA	NA	NA	NA	NA	NA	NA	NA	NA
ENSG00000229619	AC106722.1	-0.397834	0.491763	NA	NA	-3.48704	9.40422e-10	-4.21943	5.42822e-11	0.110406	0.870177	-3.40189	2.12137e-09	-3.83294	2.99863e-10	0.466292	0.302762	-1.52902	0.000318543	-2.0206	1.40219e-05	0.662271	0.143375	NA	NA	NA	NA	NA	NA	NA	NA	NA	NA	NA	NA
ENSG00000223652	AC106786.1	-1.57918	8.06092e-05	NA	NA	-2.14884	1.80993e-07	-2.05054	3.34799e-07	-0.243508	0.685552	-1.21289	0.00163989	-0.833074	0.0268809	0.0539315	0.930479	-0.21486	0.599026	-0.699198	0.0668307	0.492594	0.27813	NA	NA	NA	NA	NA	NA	NA	NA	NA	NA	NA	NA
ENSG00000228496	AC106875.1	NA	NA	NA	NA	4.8338	6.30079e-06	4.30811	3.09664e-05	NA	NA	4.65048	4.68553e-06	4.17369	2.11764e-05	NA	NA	NA	NA	NA	NA	NA	NA	NA	NA	NA	NA	NA	NA	NA	NA	NA	NA	NA	NA
ENSG00000231315	AC107613.1	NA	NA	NA	NA	NA	NA	NA	NA	NA	NA	NA	NA	NA	NA	NA	NA	2.42794	0.00180552	2.3401	0.00215499	NA	NA	NA	NA	NA	NA	NA	NA	NA	NA	NA	NA	NA	NA
ENSG00000227077	AC107983.4	0.134885	0.885553	NA	NA	0.180802	0.692254	0.517302	0.211834	0.374352	0.570451	0.631553	0.125195	0.863889	0.0296356	0.756466	0.107583	0.665025	0.0952517	0.23157	0.588799	0.35832	0.476953	NA	NA	NA	NA	NA	NA	NA	NA	NA	NA	NA	NA
ENSG00000243840	AC108058.1	NA	NA	NA	NA	4.30994	3.58056e-07	3.78758	3.37663e-06	NA	NA	3.12084	1.8936e-06	NA	NA	NA	NA	NA	NA	NA	NA	NA	NA	NA	NA	NA	NA	NA	NA	NA	NA	NA	NA	NA	NA
ENSG00000177822	AC108142.1	5.07186	1.19694e-08	NA	NA	4.2143	5.43766e-08	4.10035	8.90553e-08	NA	NA	1.08653	0.00589737	0.885499	0.0210707	0.610062	0.205245	1.39251	0.000512929	1.15957	0.00288712	-0.560256	0.226879	NA	NA	NA	NA	NA	NA	NA	NA	NA	NA	NA	NA
ENSG00000227992	AC108463.2	0.419998	0.497472	NA	NA	-1.31344	0.00108009	-1.11353	0.00439104	0.433435	0.450659	-0.926466	0.0177478	-1.23079	0.00140894	0.615653	0.167155	-0.29587	0.497448	-0.815468	0.04728	0.209603	0.711257	NA	NA	NA	NA	NA	NA	NA	NA	NA	NA	NA	NA
ENSG00000233488	AC108463.3	0.687701	0.253949	NA	NA	-0.487922	0.24834	-1.31112	0.00304254	0.0910425	0.91355	-0.906508	0.0314505	-1.89829	6.52003e-05	0.00463546	0.995619	-0.679127	0.103907	-1.26247	0.00394602	0.0213898	0.974304	NA	NA	NA	NA	NA	NA	NA	NA	NA	NA	NA	NA
ENSG00000234171	AC108488.3	0.100996	0.888382	NA	NA	-1.53562	1.02314e-06	-1.62621	2.38176e-07	-0.353322	0.4726	-1.24931	6.88296e-05	-1.50217	1.7285e-06	-0.18838	0.675864	-1.17875	0.000161644	-1.19554	0.000129101	-0.505065	0.193825	NA	NA	NA	NA	NA	NA	NA	NA	NA	NA	NA	NA
ENSG00000242282	AC108488.4	-0.313638	0.577072	NA	NA	-2.35795	1.6012e-08	-2.13282	7.98262e-08	0.384306	0.436377	-1.69003	2.97012e-06	-1.55088	9.14241e-06	0.305798	0.479742	-1.11532	0.000801675	-1.60511	9.17823e-06	0.240737	0.59648	NA	NA	NA	NA	NA	NA	NA	NA	NA	NA	NA	NA
ENSG00000244675	AC108676.1	0.494939	0.709245	NA	NA	-0.479158	0.51034	-1.63225	0.0297999	0.257962	0.845805	-0.371369	0.601544	-1.37755	0.0503796	-0.224524	0.831955	2.8103	0.000318264	1.79777	0.0139481	1.12784	0.217959	NA	NA	NA	NA	NA	NA	NA	NA	NA	NA	NA	NA
ENSG00000176349	AC110781.3	NA	NA	NA	NA	10.4081	1.04569e-07	8.506	5.17104e-06	NA	NA	7.47455	3.36211e-07	6.80889	1.24515e-06	NA	NA	NA	NA	NA	NA	NA	NA	NA	NA	NA	NA	NA	NA	NA	NA	NA	NA	NA	NA
ENSG00000175772	AC112229.7	-0.340413	0.766696	NA	NA	-0.0514101	0.934348	-1.14211	0.0537606	0.731942	0.369271	-0.0955545	0.879818	NA	NA	-0.167693	0.852138	NA	NA	NA	NA	NA	NA	NA	NA	NA	NA	NA	NA	NA	NA	NA	NA	NA	NA
ENSG00000222022	AC112721.1	NA	NA	NA	NA	NA	NA	NA	NA	NA	NA	NA	NA	NA	NA	NA	NA	0.898687	0.190351	NA	NA	NA	NA	NA	NA	NA	NA	NA	NA	NA	NA	NA	NA	NA	NA
ENSG00000266050	AC113144.2	NA	NA	NA	NA	NA	NA	NA	NA	NA	NA	NA	NA	NA	NA	NA	NA	1.03751	0.0582885	0.679404	0.207678	0.749212	0.238639	NA	NA	NA	NA	NA	NA	NA	NA	NA	NA	NA	NA
ENSG00000233223	AC113189.5	0.168437	0.83407	NA	NA	-1.76935	5.69904e-06	-2.11882	3.84329e-07	-0.118482	0.867474	-1.22603	0.00123934	-2.25752	1.3857e-07	0.150085	0.781318	-1.32524	0.000592008	-1.87157	2.62038e-06	0.0640674	0.913879	NA	NA	NA	NA	NA	NA	NA	NA	NA	NA	NA	NA
ENSG00000237667	AC113607.1	NA	NA	NA	NA	NA	NA	NA	NA	NA	NA	NA	NA	NA	NA	NA	NA	6.56963	2.0204e-06	6.16888	3.83979e-06	NA	NA	NA	NA	NA	NA	NA	NA	NA	NA	NA	NA	NA	NA
ENSG00000188971	AC114772.1	0.0926963	0.861265	NA	NA	-0.267935	0.247477	-0.16396	0.491717	-0.116089	0.789161	-0.52678	0.0182789	-0.470035	0.0349116	-0.332882	0.264696	-0.195197	0.411293	-0.121478	0.624586	-0.354049	0.213969	NA	NA	NA	NA	NA	NA	NA	NA	NA	NA	NA	NA
ENSG00000178836	AC114812.5	NA	NA	NA	NA	9.29859	1.11298e-06	8.93435	2.09917e-06	NA	NA	NA	NA	NA	NA	NA	NA	NA	NA	NA	NA	NA	NA	NA	NA	NA	NA	NA	NA	NA	NA	NA	NA	NA	NA
ENSG00000248341	AC115115.2	-0.50546	0.423278	NA	NA	0.426466	0.307347	-0.212766	0.623865	0.657618	0.222092	0.448802	0.298208	0.0345056	0.94308	0.909661	0.0490226	1.71949	4.51416e-05	0.751145	0.0856466	1.2614	0.00729676	NA	NA	NA	NA	NA	NA	NA	NA	NA	NA	NA	NA
ENSG00000233585	AC115617.2	NA	NA	NA	NA	NA	NA	NA	NA	NA	NA	NA	NA	NA	NA	NA	NA	3.47709	0.00076983	NA	NA	NA	NA	NA	NA	NA	NA	NA	NA	NA	NA	NA	NA	NA	NA
ENSG00000234290	AC116366.6	NA	NA	NA	NA	NA	NA	NA	NA	NA	NA	NA	NA	NA	NA	NA	NA	1.44078	0.0585517	NA	NA	NA	NA	NA	NA	NA	NA	NA	NA	NA	NA	NA	NA	NA	NA
ENSG00000235688	AC116614.1	NA	NA	NA	NA	NA	NA	NA	NA	NA	NA	NA	NA	NA	NA	NA	NA	4.77105	1.50926e-06	4.2025	8.92065e-06	NA	NA	NA	NA	NA	NA	NA	NA	NA	NA	NA	NA	NA	NA
ENSG00000268175	AC117395.1	0.0111916	0.990741	NA	NA	1.38623	9.46397e-06	0.700974	0.0271791	0.273139	0.606513	0.780954	0.0148013	0.522051	0.107243	0.200864	0.66114	1.71219	1.81903e-07	1.71198	1.79229e-07	0.812667	0.0355384	NA	NA	NA	NA	NA	NA	NA	NA	NA	NA	NA	NA
ENSG00000248865	AC121336.2	NA	NA	NA	NA	1.03283	0.0232442	1.43803	0.000806713	0.888049	0.14099	NA	NA	1.6516	0.000675237	NA	NA	NA	NA	NA	NA	NA	NA	NA	NA	NA	NA	NA	NA	NA	NA	NA	NA	NA	NA
ENSG00000179449	AC124309.1	NA	NA	NA	NA	NA	NA	NA	NA	NA	NA	NA	NA	NA	NA	NA	NA	4.12458	5.37441e-07	3.8107	1.40735e-06	NA	NA	NA	NA	NA	NA	NA	NA	NA	NA	NA	NA	NA	NA
ENSG00000260833	AC124789.1	0.371619	0.575909	NA	NA	-2.29885	1.89102e-06	-2.89832	7.63779e-08	0.532969	0.355219	-1.73651	6.83989e-05	-2.60206	3.10238e-07	0.435987	0.386107	-0.876756	0.0254017	-1.58266	0.000243401	0.595649	0.210727	NA	NA	NA	NA	NA	NA	NA	NA	NA	NA	NA	NA
ENSG00000231259	AC125232.1	-0.669707	0.162844	NA	NA	0.253693	0.505467	0.751724	0.0316941	0.312655	0.588052	1.19376	0.000777232	1.29045	0.000228286	0.507693	0.263321	1.17719	0.000853381	1.14402	0.00121462	0.388752	0.402941	NA	NA	NA	NA	NA	NA	NA	NA	NA	NA	NA	NA
ENSG00000224791	AC125238.4	NA	NA	NA	NA	NA	NA	NA	NA	NA	NA	NA	NA	NA	NA	NA	NA	-0.429383	0.483509	-0.293299	0.636842	0.0592895	0.949038	NA	NA	NA	NA	NA	NA	NA	NA	NA	NA	NA	NA
ENSG00000175911	AC127496.1	-0.661926	0.258844	NA	NA	-2.13252	1.27828e-05	-1.70042	0.000160102	0.0352358	0.967229	-1.00023	0.0182483	-1.31596	0.00238174	0.693199	0.173864	-0.487451	0.26815	-0.468899	0.287717	-0.454642	0.430212	NA	NA	NA	NA	NA	NA	NA	NA	NA	NA	NA	NA
ENSG00000230732	AC127904.2	NA	NA	NA	NA	NA	NA	2.12239	1.97398e-05	NA	NA	NA	NA	1.15574	0.0102508	NA	NA	NA	NA	0.732141	0.143531	NA	NA	NA	NA	NA	NA	NA	NA	NA	NA	NA	NA	NA	NA
ENSG00000214999	AC129492.6	NA	NA	NA	NA	NA	NA	NA	NA	NA	NA	NA	NA	NA	NA	NA	NA	1.8167	0.00747469	1.08272	0.102009	NA	NA	NA	NA	NA	NA	NA	NA	NA	NA	NA	NA	NA	NA
ENSG00000238184	AC129929.5	NA	NA	NA	NA	NA	NA	2.22168	0.000689734	NA	NA	NA	NA	NA	NA	NA	NA	NA	NA	NA	NA	NA	NA	NA	NA	NA	NA	NA	NA	NA	NA	NA	NA	NA	NA
ENSG00000205873	AC130352.1	0.437058	0.282175	NA	NA	-0.344425	0.222675	-0.570778	0.0369571	-0.155296	0.762744	-0.156007	0.600642	-0.395002	0.156272	0.124494	0.769392	1.21557	9.41927e-06	1.50188	5.78584e-08	0.621109	0.0647982	NA	NA	NA	NA	NA	NA	NA	NA	NA	NA	NA	NA
ENSG00000253864	AC131025.8	-0.830204	0.245579	NA	NA	-3.47548	1.06909e-06	-4.08922	1.3887e-07	1.00141	0.146114	-2.3387	0.000195495	-3.65223	1.71573e-06	1.14723	0.0627087	-1.86914	0.00297495	-2.12316	0.00102677	0.236581	0.765078	NA	NA	NA	NA	NA	NA	NA	NA	NA	NA	NA	NA
ENSG00000268403	AC132192.1	0.200926	0.820758	NA	NA	-0.624991	0.168726	-1.23058	0.00504065	-0.313195	0.662167	-0.968444	0.0278422	-1.34951	0.00203142	-0.123031	0.846886	-0.137157	0.788481	-0.806557	0.0793841	0.012139	0.985935	NA	NA	NA	NA	NA	NA	NA	NA	NA	NA	NA	NA
ENSG00000240801	AC132217.4	NA	NA	NA	NA	7.15315	3.2517e-08	6.16627	6.41189e-07	NA	NA	8.18255	1.26081e-09	7.28646	1.0036e-08	NA	NA	3.33422	8.37239e-06	2.40894	0.000398911	2.06868	0.00849674	NA	NA	NA	NA	NA	NA	NA	NA	NA	NA	NA	NA
ENSG00000184551	AC132872.1	1.3638	0.0448593	NA	NA	4.10072	6.14208e-09	3.62063	4.72272e-08	NA	NA	3.27115	8.45306e-08	3.28546	7.06809e-08	-0.42788	0.526819	2.18626	2.31736e-05	2.14188	3.2533e-05	-1.22629	0.0383454	NA	NA	NA	NA	NA	NA	NA	NA	NA	NA	NA	NA
ENSG00000268852	AC132872.2	1.55565	0.00322281	NA	NA	4.13872	4.30794e-11	3.67574	4.02853e-10	NA	NA	2.92322	4.24775e-09	2.97553	2.8766e-09	-0.738996	0.137065	2.1763	4.86641e-07	2.07065	1.14105e-06	-1.61475	0.00136715	NA	NA	NA	NA	NA	NA	NA	NA	NA	NA	NA	NA
ENSG00000228989	AC133528.2	-0.0186704	0.985309	NA	NA	-0.5161	0.163214	-0.715628	0.0465552	0.210447	0.737318	-0.43068	0.251616	-0.851969	0.0178046	0.321154	0.493269	-0.128184	0.759791	-0.439145	0.262989	0.292616	0.556256	NA	NA	NA	NA	NA	NA	NA	NA	NA	NA	NA	NA
ENSG00000237838	AC133680.1	NA	NA	NA	NA	5.67313	3.46933e-07	4.99632	3.42007e-06	NA	NA	NA	NA	5.73224	2.06726e-06	NA	NA	NA	NA	NA	NA	NA	NA	NA	NA	NA	NA	NA	NA	NA	NA	NA	NA	NA	NA
ENSG00000261487	AC135048.13	-0.218629	0.697109	NA	NA	-1.88891	3.42272e-07	-2.23787	2.92234e-08	0.654349	0.114421	-0.970197	0.00153673	-1.64868	3.17546e-06	0.90926	0.0138408	-0.684367	0.021981	-0.681833	0.0226865	1.13791	0.00245484	NA	NA	NA	NA	NA	NA	NA	NA	NA	NA	NA	NA
ENSG00000198150	AC135178.1	-0.239801	0.759612	NA	NA	-0.64771	0.109583	-0.767476	0.0516995	0.754347	0.138354	-0.985438	0.0168256	-0.909861	0.0243064	0.622233	0.178734	1.19849	0.00291994	0.80424	0.0489545	1.87102	8.30127e-05	NA	NA	NA	NA	NA	NA	NA	NA	NA	NA	NA	NA
ENSG00000268218	AC137932.1	NA	NA	NA	NA	NA	NA	6.05121	2.35195e-06	NA	NA	NA	NA	NA	NA	NA	NA	4.01751	8.31626e-05	4.03385	6.77894e-05	NA	NA	NA	NA	NA	NA	NA	NA	NA	NA	NA	NA	NA	NA
ENSG00000262898	AC139099.4	-1.08712	0.116388	NA	NA	-4.90199	6.14702e-07	-4.91509	3.42374e-07	0.639412	0.3801	NA	NA	NA	NA	0.672342	0.317667	NA	NA	NA	NA	NA	NA	NA	NA	NA	NA	NA	NA	NA	NA	NA	NA	NA	NA
ENSG00000267270	AC139100.2	-0.448245	0.510895	NA	NA	0.172586	0.703921	0.361166	0.391803	0.229933	0.749185	0.0527682	0.913268	0.806001	0.0513927	-0.0989434	0.881978	0.410265	0.394523	NA	NA	0.552802	0.312613	NA	NA	NA	NA	NA	NA	NA	NA	NA	NA	NA	NA
ENSG00000215154	AC141586.5	0.425204	0.425753	NA	NA	-1.4387	3.10372e-05	-1.16109	0.0006588	0.0506472	0.941591	-1.69215	2.10657e-06	-1.7565	1.15576e-06	-0.31209	0.48943	-1.70763	3.11633e-06	-1.54544	1.20279e-05	-0.448958	0.305154	NA	NA	NA	NA	NA	NA	NA	NA	NA	NA	NA	NA
ENSG00000259778	AC141846.4	-0.382568	0.441483	NA	NA	0.659018	0.0297109	1.19535	5.4117e-05	0.769375	0.0607078	0.511079	0.103145	1.0994	0.00023989	0.920487	0.00976812	0.385423	0.223203	0.532344	0.0862993	0.476771	0.212002	NA	NA	NA	NA	NA	NA	NA	NA	NA	NA	NA	NA
ENSG00000250986	AC141928.1	NA	NA	NA	NA	NA	NA	NA	NA	NA	NA	NA	NA	NA	NA	NA	NA	-0.931042	0.0560366	-2.04951	0.000216451	0.573499	0.296665	NA	NA	NA	NA	NA	NA	NA	NA	NA	NA	NA	NA
ENSG00000173867	AC142401.2	0.246545	0.622578	NA	NA	-0.302952	0.279945	-0.465892	0.0869263	-0.294294	0.503692	-0.464437	0.091044	-0.438402	0.10854	-0.579721	0.0834706	-0.387917	0.162511	-0.316783	0.263238	-0.501846	0.133995	NA	NA	NA	NA	NA	NA	NA	NA	NA	NA	NA	NA
ENSG00000235078	AC142528.1	NA	NA	NA	NA	NA	NA	1.93457	0.00122821	NA	NA	NA	NA	2.70951	8.65525e-05	NA	NA	2.05243	0.00190017	2.07136	0.00156934	NA	NA	NA	NA	NA	NA	NA	NA	NA	NA	NA	NA	NA	NA
ENSG00000234742	AC144530.1	0.177132	0.827001	NA	NA	-0.426495	0.288045	-0.515486	0.185661	-0.127526	0.859795	-0.785852	0.0436969	-0.691028	0.0727039	-0.601966	0.190191	-0.0944419	0.828195	-0.172478	0.686616	0.0316206	0.958549	NA	NA	NA	NA	NA	NA	NA	NA	NA	NA	NA	NA
ENSG00000261888	AC144831.1	-1.22126	0.0467342	NA	NA	-1.38866	0.00412904	-1.64113	0.00103709	0.735649	0.290051	-0.847245	0.0723298	-1.44258	0.00338057	0.861001	0.15208	0.804979	0.15555	0.83077	0.142014	0.795904	0.276641	NA	NA	NA	NA	NA	NA	NA	NA	NA	NA	NA	NA
ENSG00000255495	AC145124.2	0.301264	0.67546	NA	NA	0.124506	0.779296	-0.292846	0.485837	-0.192237	0.788325	0.0846137	0.84892	-0.384728	0.348446	-0.0364971	0.954601	NA	NA	NA	NA	NA	NA	NA	NA	NA	NA	NA	NA	NA	NA	NA	NA	NA	NA
ENSG00000215750	AC145212.1	-0.382572	0.651921	NA	NA	-0.355148	0.452268	0.159759	0.734057	0.268902	0.73737	0.817502	0.0722699	1.49943	0.00123581	0.906794	0.109774	1.56712	0.0018487	1.31556	0.00764005	NA	NA	NA	NA	NA	NA	NA	NA	NA	NA	NA	NA	NA	NA
ENSG00000265055	AC145343.2	NA	NA	NA	NA	3.0803	9.97796e-07	2.75863	5.02766e-06	NA	NA	4.80456	2.79344e-08	4.35921	1.82519e-07	NA	NA	3.04992	6.32051e-06	NA	NA	NA	NA	NA	NA	NA	NA	NA	NA	NA	NA	NA	NA	NA	NA
ENSG00000223855	AC147651.3	-0.82152	0.235629	NA	NA	-1.05373	0.0333988	-2.43528	6.57082e-05	-0.0347611	0.971616	NA	NA	NA	NA	1.33222	0.0234749	-0.782226	0.0767828	-1.30567	0.00408236	1.21618	0.0143204	NA	NA	NA	NA	NA	NA	NA	NA	NA	NA	NA	NA
ENSG00000256546	AC156455.1	-0.137802	0.87996	NA	NA	-0.055401	0.906037	-0.59781	0.156497	0.686235	0.208676	0.239459	0.593435	-0.471708	0.277627	0.868751	0.0586282	0.860064	0.0559019	NA	NA	NA	NA	NA	NA	NA	NA	NA	NA	NA	NA	NA	NA	NA	NA
ENSG00000230606	AC159540.1	-0.427243	0.410988	NA	NA	-0.217402	0.544277	-0.483835	0.152955	0.826987	0.0581094	0.0409744	0.914473	0.0222566	0.954467	0.739412	0.0578198	-1.0089	0.00312502	-1.20395	0.000400966	0.714359	0.0702882	NA	NA	NA	NA	NA	NA	NA	NA	NA	NA	NA	NA
ENSG00000215621	AC174470.1	-0.364986	0.266123	NA	NA	-0.0918789	0.701909	-1.1718	1.83005e-06	-0.0458969	0.923208	-0.00241401	0.992339	-0.653868	0.00232659	0.194836	0.538544	0.403435	0.0696697	-0.487833	0.0276679	0.321884	0.256459	NA	NA	NA	NA	NA	NA	NA	NA	NA	NA	NA	NA
ENSG00000253917	AC226119.4	1.23433	0.0748161	NA	NA	0.696343	0.185044	0.947965	0.0678187	-0.199219	0.85384	0.210638	0.685987	0.650561	0.181319	-0.721317	0.27805	-2.44973	1.52837e-05	-2.28674	3.69709e-05	-1.30606	0.0257967	NA	NA	NA	NA	NA	NA	NA	NA	NA	NA	NA	NA
ENSG00000060971	ACAA1	0.0606419	0.905988	-0.367054	0.626355	1.00564	1.05847e-06	1.2612	3.07418e-08	0.0780993	0.854462	1.22447	4.86198e-08	1.47545	2.00428e-09	0.0470911	0.896475	0.825022	7.23551e-05	0.991864	2.07398e-06	0.230316	0.417655	0.316002	0.563969	0.59235	0.111675	-0.0871166	0.862797	0.232424	0.792038	1.28204	0.000575825	0.299843	0.424407
ENSG00000167315	ACAA2	0.0494722	0.941941	0.0118105	0.993471	0.976852	0.000148267	0.650321	0.0127091	0.244075	0.587555	0.821231	0.00158101	0.662123	0.0111427	0.178625	0.647508	1.42924	6.82918e-08	1.11822	2.16547e-05	0.17555	0.652818	0.206843	0.398622	-0.622384	0.00090572	0.3799	0.0415429	0.332876	0.114343	-0.482871	0.00383611	0.688174	0.00025286
ENSG00000132142	ACACA	0.175851	0.66788	NA	NA	-0.300433	0.162768	0.0962282	0.676254	-0.0397051	0.931047	0.304002	0.158933	0.448609	0.0339722	-0.0947617	0.776035	0.0281781	0.908238	0.112497	0.631868	-0.258914	0.35165	NA	NA	NA	NA	NA	NA	NA	NA	NA	NA	NA	NA
ENSG00000076555	ACACB	-0.735766	0.0151582	-0.391109	0.801461	1.48631	4.28318e-08	1.11058	6.06352e-06	0.874709	0.0103982	1.55321	2.49286e-08	1.4092	1.21629e-07	-0.0833287	0.843633	1.82556	2.35221e-09	1.42054	1.72906e-07	0.673699	0.0252527	0.176712	0.856376	2.37124	0.00036436	0.922699	0.145013	0.601816	0.525365	0.873806	0.105776	0.755367	0.178046
ENSG00000111271	ACAD10	-0.230197	0.573293	0.203098	0.506507	1.29781	1.02812e-06	1.64987	2.55553e-08	0.373619	0.270324	1.12203	9.77739e-06	1.42341	2.98051e-07	0.341704	0.252024	1.41666	3.63776e-07	1.32998	1.11178e-06	0.638473	0.0242369	-0.357516	0.116306	0.443635	0.0138241	-0.393562	0.0422503	0.0284668	0.973776	0.49157	0.00450159	-0.516054	0.00540801
ENSG00000240303	ACAD11	-0.330877	0.358648	0.260563	0.646528	-0.227455	0.339537	-0.172702	0.474335	0.387515	0.252634	-0.280102	0.235764	-0.233465	0.323067	0.405817	0.16761	0.258798	0.278635	0.284792	0.233489	0.310703	0.294838	0.18457	0.655629	-0.357417	0.195519	-0.184939	0.580464	0.350695	0.397416	-0.0834811	0.767959	0.274666	0.321861
ENSG00000151498	ACAD8	-0.122926	0.813622	0.249173	0.439917	-0.238431	0.32173	0.733517	0.00111075	0.214675	0.587555	-0.0611102	0.812898	0.586548	0.00961456	0.0805947	0.833347	0.11667	0.645121	0.438455	0.060281	0.22861	0.468377	0.0950816	0.763709	0.575028	0.00639682	0.169201	0.46702	0.286509	0.295771	0.302956	0.118599	0.167722	0.414587
ENSG00000177646	ACAD9	0.27742	0.450004	-0.117604	0.587634	-0.35781	0.105908	0.120853	0.609766	-0.287312	0.410907	-0.55825	0.00992727	-0.210587	0.353583	-0.423203	0.128963	-0.637001	0.0031911	-0.455163	0.03879	-0.346706	0.211988	-0.249094	0.0933023	-0.524187	0.000111676	-0.543377	0.000161458	-0.198915	0.189409	-0.35858	0.00224777	-0.61198	1.96982e-05
ENSG00000117054	ACADM	-0.00134464	0.998414	0.033327	0.993471	-0.577468	0.00857556	-0.492685	0.0257001	0.0935445	0.833623	-0.722569	0.000926827	-0.696592	0.00135536	0.0419403	0.913262	-0.92829	2.12209e-05	-0.738324	0.000767011	-0.194947	0.527706	-0.576158	0.397143	-0.602915	0.201323	-0.292296	0.603481	-0.310877	0.765008	-1.26706	0.00792981	-0.710357	0.127406
ENSG00000122971	ACADS	-0.252919	0.663122	-0.181854	0.778095	0.0793589	0.817086	-0.28239	0.381136	-0.106781	0.859666	0.0814318	0.814994	-0.103265	0.763273	0.0417113	0.937472	0.12638	0.713433	-0.0523779	0.884637	0.44475	0.254839	0.639799	0.041779	0.0473676	0.865384	0.960867	0.00124144	0.291073	0.460615	0.363998	0.110961	1.17305	5.83628e-05
ENSG00000196177	ACADSB	0.238021	0.592392	-0.142284	0.967703	1.91742	8.48362e-09	2.44361	1.32769e-10	0.146507	0.749185	1.67675	8.7148e-08	2.25914	5.17282e-10	-0.18732	0.597844	1.27652	6.56889e-06	1.55191	4.19623e-07	0.124958	0.733539	-0.363989	0.725144	1.73113	0.0137666	-0.213853	0.806289	0.0444646	0.990044	0.707617	0.263445	-0.497532	0.47667
ENSG00000072778	ACADVL	-0.333633	0.305197	-0.289554	0.421098	0.351613	0.102857	0.30763	0.15548	0.0249714	0.956903	0.294032	0.179026	0.307942	0.153767	0.167003	0.595078	0.111926	0.633325	0.0993996	0.677852	0.0570846	0.869635	0.387776	0.174758	0.446794	0.0409879	-0.592429	0.0157559	0.242792	0.498734	0.627893	0.0024171	0.073464	0.75514
ENSG00000157766	ACAN	-9.13823	6.0757e-07	NA	NA	2.08987	0.000122243	1.30122	0.00912669	-0.49158	0.566923	9.53604	1.54045e-08	9.04049	6.08735e-08	NA	NA	-0.154615	0.749699	-0.424927	0.362022	0.0890885	0.901778	0.430808	0.681919	0.892238	0.196634	NA	NA	0.230921	0.925962	0.836942	0.176481	NA	NA
ENSG00000072818	ACAP1	-0.0339327	0.979933	-0.417536	0.786133	3.70562	3.02267e-09	3.38804	1.43269e-08	0.335629	0.678002	3.84051	1.78876e-09	3.76945	2.38549e-09	0.305925	0.644672	2.50508	1.43854e-06	2.22511	8.40529e-06	0.231675	0.717563	2.68107	0.000531394	2.14153	0.000838932	0.0736505	0.92994	2.04562	0.00263047	2.42881	7.73751e-05	1.33076	0.019578
ENSG00000114331	ACAP2	-0.129214	0.777498	0.201694	0.953136	0.00952343	0.968235	0.308612	0.146586	0.186123	0.606792	-0.0855242	0.711474	0.211266	0.330621	0.272378	0.335749	-0.177047	0.429848	-0.00788395	0.974033	0.320042	0.232347	-0.6742	0.529986	0.328376	0.666855	0.407196	0.64026	0.0868281	0.981517	-0.433206	0.543153	0.0570402	0.94676
ENSG00000131584	ACAP3	-0.196881	0.742153	0.402985	0.259281	0.628653	0.0281151	0.867891	0.0032929	-0.0483452	0.936072	0.513435	0.072986	0.846848	0.00402046	-0.0844042	0.859909	0.724894	0.0129088	0.566668	0.0507925	-0.447783	0.232769	-0.325373	0.344535	0.363454	0.137617	-0.890401	0.00217744	-0.352684	0.324125	0.68144	0.00378155	-0.599909	0.0166484
ENSG00000075239	ACAT1	-0.105552	0.824057	0.198883	0.268326	-0.109437	0.631193	-0.0805597	0.72793	-0.0733603	0.862968	-0.176332	0.428293	-0.12111	0.589631	-0.00458787	0.991574	-0.225574	0.306336	-0.11048	0.636581	0.174017	0.552606	-0.0226933	0.916789	-0.169555	0.186288	-0.497904	0.000950777	0.129954	0.551393	-0.293019	0.0151482	-0.583442	8.77446e-05
ENSG00000120437	ACAT2	0.656754	0.199871	0.239336	0.628765	-1.35533	0.000405661	-0.922861	0.0114739	-0.857566	0.0992232	-1.65244	4.4306e-05	-1.36259	0.000425214	-1.11806	0.0158771	-0.484298	0.176199	-0.285684	0.439972	-0.66397	0.140657	-0.181467	0.615271	-0.883464	0.00092141	-2.32086	1.02144e-07	-0.45091	0.164839	-0.336082	0.132378	-2.12431	1.38744e-07
ENSG00000182827	ACBD3	0.0674882	0.894181	-0.178865	0.889909	0.381384	0.0706057	0.285521	0.181637	0.155137	0.683505	0.400084	0.0580681	0.196943	0.366577	0.249065	0.38645	0.0575658	0.808343	0.101842	0.665043	0.144646	0.63079	-0.404196	0.489133	0.298464	0.457469	-0.329406	0.470066	-0.102881	0.946051	-0.492326	0.191604	-0.596668	0.12547
ENSG00000181513	ACBD4	-0.430911	0.329618	-0.0275518	0.990922	2.57046	7.7717e-10	2.38761	3.84398e-09	0.799318	0.0539557	2.67958	4.783e-10	2.58328	1.10528e-09	1.00907	0.00717254	3.0819	7.33502e-11	3.00014	1.24957e-10	1.13607	0.00231916	1.34393	0.000255875	2.23969	1.06142e-07	1.3896	9.14153e-05	1.48137	3.25681e-05	2.85618	1.02747e-09	1.98747	4.59754e-07
ENSG00000107897	ACBD5	0.0180471	0.977392	-0.0921725	0.967703	-0.771258	0.000263951	-0.807425	0.000131885	0.185722	0.626114	-0.715798	0.000744887	-0.827693	8.42092e-05	0.136067	0.678151	-0.839741	7.9404e-05	-0.854076	6.30088e-05	0.148227	0.634865	-0.489649	0.445789	-0.514231	0.242594	0.158291	0.776795	-0.206409	0.871095	-1.17274	0.00811958	-0.205881	0.659665
ENSG00000135847	ACBD6	0.0335954	0.957153	0.170571	0.939453	0.0244589	0.924228	-0.248846	0.288137	-0.15247	0.717819	-0.052563	0.83761	-0.208713	0.377442	-0.104185	0.771868	-0.161182	0.507779	-0.181024	0.458998	-0.275369	0.356029	-0.430972	0.586232	-1.00726	0.0634873	0.30198	0.628743	NA	NA	NA	NA	0.477007	0.363835
ENSG00000176244	ACBD7	-1.00134	0.162064	NA	NA	-0.411998	0.426952	0.387807	0.450836	-1.61413	0.0374529	1.10201	0.0336205	1.60375	0.00264605	-0.199457	0.803998	1.88416	0.000783422	2.1965	0.00017137	0.300348	0.688819	NA	NA	2.35645	0.000558766	NA	NA	NA	NA	NA	NA	NA	NA
ENSG00000110455	ACCS	-0.37224	0.51172	-0.30956	0.44371	-0.496563	0.134016	-1.0307	0.00308671	0.84275	0.0800997	-0.446548	0.182593	-1.08009	0.00212588	0.994596	0.0200071	0.148983	0.673397	-0.489904	0.147899	1.29316	0.00272773	0.258887	0.467819	-0.894461	0.000983535	0.854698	0.00244793	0.054424	0.957772	-0.811743	0.001221	1.21272	2.6337e-05
ENSG00000102977	ACD	0.258519	0.571262	0.258776	0.782335	-1.39237	2.89165e-08	-0.485348	0.0560739	-0.26568	0.527949	-1.4566	7.58535e-09	-0.576747	0.0217758	-0.434732	0.183622	-1.22318	1.09064e-06	-0.789206	0.00164846	-0.267931	0.432642	-0.223831	0.681724	-1.49078	0.000364111	-0.0383826	0.941269	-0.466426	0.403048	-0.821137	0.018683	0.387333	0.281502
ENSG00000159640	ACE	-0.70239	0.287755	-0.162544	0.899884	1.72844	0.000137098	1.13164	0.00764924	0.417311	0.545151	2.02451	3.09116e-05	1.38545	0.00204734	1.44556	0.00938467	2.11301	3.06814e-05	0.823871	0.0721496	1.41132	0.012341	0.418885	0.449069	0.309636	0.423399	1.28053	0.00323078	0.206244	0.83868	-0.297171	0.422607	0.277636	0.474684
ENSG00000264813	ACE	NA	NA	NA	NA	2.16207	3.48294e-05	1.49683	0.00212385	1.15745	0.0914802	2.34254	2.73421e-05	1.84341	0.00050145	1.72383	0.00823578	2.30373	5.92427e-05	NA	NA	NA	NA	NA	NA	NA	NA	NA	NA	NA	NA	NA	NA	NA	NA
ENSG00000177076	ACER2	0.361213	0.511844	NA	NA	2.08344	4.89356e-10	2.35847	5.07036e-11	-0.27541	0.625833	2.03264	7.1443e-10	2.28676	7.44818e-11	-0.165855	0.730234	1.32717	2.48816e-05	1.42783	5.94781e-06	0.0353193	0.947461	NA	NA	1.41619	0.169494	NA	NA	NA	NA	NA	NA	NA	NA
ENSG00000078124	ACER3	0.253316	0.61699	-0.0458637	0.992113	-0.300479	0.293454	-0.193501	0.508847	-0.252747	0.58787	-0.389604	0.169248	-0.263197	0.359341	-0.583567	0.086247	-0.689065	0.0116734	-0.608286	0.0272607	-0.419207	0.227712	-0.0571401	0.952132	0.496572	0.327965	-0.918256	0.0956966	0.119851	0.952606	-0.166119	0.745788	-0.818562	0.104037
ENSG00000087085	ACHE	0.604368	0.512494	NA	NA	5.01526	9.01027e-11	5.01711	1.02056e-10	NA	NA	4.75896	1.42899e-10	4.98611	6.58162e-11	-0.384174	0.610443	3.83193	4.20397e-09	4.0273	2.13161e-09	-0.413383	0.525717	1.51345	0.0354918	2.37187	0.000262731	0.264587	0.722669	NA	NA	3.06834	5.40578e-06	NA	NA
ENSG00000100813	ACIN1	-0.140865	0.754228	0.0581571	0.956461	-0.554738	0.00810788	-0.458083	0.0295849	0.077242	0.856562	-0.420363	0.0485009	-0.449191	0.0327069	0.172089	0.57984	-0.395116	0.0659407	-0.329981	0.13129	0.143035	0.638725	-0.413097	0.144295	-1.20619	1.07722e-05	0.08671	0.755731	-0.249408	0.474092	-1.22035	3.66644e-06	0.168179	0.437131
ENSG00000213088	ACKR1	NA	NA	-5.64011	1.01665e-05	NA	NA	NA	NA	NA	NA	NA	NA	NA	NA	NA	NA	NA	NA	NA	NA	NA	NA	NA	NA	NA	NA	NA	NA	1.05118	0.180365	0.0256381	0.968738	1.48626	0.0139249
ENSG00000144648	ACKR2	NA	NA	NA	NA	NA	NA	NA	NA	NA	NA	NA	NA	NA	NA	NA	NA	NA	NA	NA	NA	NA	NA	NA	NA	2.62515	0.000960922	3.38386	0.000201885	0.455773	0.731273	0.0748883	0.909995	2.39941	0.000527854
ENSG00000144476	ACKR3	NA	NA	NA	NA	NA	NA	NA	NA	NA	NA	NA	NA	NA	NA	NA	NA	NA	NA	NA	NA	NA	NA	NA	NA	NA	NA	4.86013	0.0122276	NA	NA	NA	NA	NA	NA
ENSG00000131473	ACLY	0.206541	0.602875	-0.164029	0.809644	-0.348214	0.109575	-0.248115	0.262298	-0.230285	0.519831	-0.259904	0.242615	-0.017173	0.944999	-0.331139	0.242692	-0.65938	0.00192035	-0.490316	0.0232894	-0.320343	0.244537	-0.285315	0.44867	0.369708	0.149289	-0.89504	0.00215085	-0.262085	0.528553	0.0228154	0.934307	-1.30985	3.63342e-05
ENSG00000196636	ACN9	-0.688776	0.0488881	NA	NA	1.39605	2.76066e-07	1.88406	1.47375e-11	0.0168763	0.978085	1.44387	1.77005e-07	1.81916	8.15285e-11	-0.178122	0.672079	1.21385	8.90213e-06	1.41674	2.62319e-07	-0.219979	0.5704	NA	NA	NA	NA	NA	NA	NA	NA	NA	NA	NA	NA
ENSG00000122729	ACO1	0.514171	0.0521363	0.230586	0.625706	0.217258	0.321708	0.619758	0.00258007	-0.264203	0.43175	0.0698018	0.763494	0.374013	0.074732	-0.388664	0.145878	-0.209948	0.342329	0.0864152	0.714322	-0.304882	0.257091	0.301977	0.389227	0.382855	0.114571	-0.00349098	0.992868	0.174082	0.725722	0.206386	0.381308	-0.290484	0.227639
ENSG00000100412	ACO2	-0.0658139	0.897077	-0.0719959	0.89866	0.190172	0.388737	0.412606	0.0486922	0.0354343	0.936468	0.11413	0.616503	0.36869	0.0792244	0.012478	0.974644	-0.221018	0.317631	-0.0311315	0.899332	0.148536	0.619533	-0.306365	0.15536	-0.440462	0.0104378	-0.484977	0.00966279	-0.215975	0.382598	-0.2396	0.112579	-0.405558	0.0144926
ENSG00000184227	ACOT1	-0.240171	0.728475	0.539408	0.716026	-1.84531	3.74088e-07	-2.5227	3.45792e-10	-0.00090293	0.99863	-1.84279	6.15748e-07	-2.26729	2.67548e-09	-0.0514713	0.930479	-1.14391	0.00143482	-1.64609	5.75877e-06	0.384758	0.393949	0.425178	0.653398	-2.00029	0.00692097	0.466878	0.531316	NA	NA	NA	NA	1.07224	0.0860166
ENSG00000162390	ACOT11	-1.51361	0.00171166	-0.856009	0.138806	-0.950324	0.0123047	-1.71254	6.62022e-05	0.447499	0.432829	0.375607	0.345975	-0.407881	0.314294	0.443277	0.398899	0.16037	0.670374	-0.513816	0.155494	0.499868	0.26789	0.419705	0.513239	-0.648394	0.143836	-0.801658	0.0977626	0.649767	0.251411	-0.607067	0.134478	-0.721511	0.0889918
ENSG00000112304	ACOT13	-0.194835	0.665989	-0.377752	0.762672	1.02034	5.60822e-06	0.937123	2.98842e-05	0.0238535	0.963387	1.08479	1.5058e-06	1.14703	3.44267e-07	0.0357682	0.93138	1.3148	3.63265e-08	1.33838	2.94189e-08	0.388088	0.183274	0.833579	0.217731	0.449798	0.3746	-0.528479	0.36115	0.249357	0.862143	1.11049	0.0167073	-0.0907378	0.873804
ENSG00000119673	ACOT2	-0.252639	0.627302	0.189229	0.695075	-2.13935	8.09519e-09	-2.88758	6.29543e-11	-0.03568	0.953196	-2.07318	1.63317e-08	-2.70269	2.20636e-10	-0.0167724	0.974213	-1.42444	7.62536e-06	-1.94267	8.58324e-08	0.177208	0.669661	0.328403	0.278276	-2.21515	8.88103e-09	0.709684	0.00438429	0.244783	0.480284	-2.09777	8.48463e-09	0.469743	0.0288827
ENSG00000177465	ACOT4	0.195975	0.822289	0.3087	0.830128	1.53864	8.98957e-05	-0.247624	0.577291	-0.897473	0.122	1.46403	0.00015992	0.459673	0.265834	-0.643683	0.200312	0.628665	0.134235	-0.719313	0.0911706	-0.0691513	0.915576	1.52256	0.0126582	0.286932	0.57538	0.292137	0.625339	1.1772	0.0472683	0.86596	0.0586853	0.170621	0.75847
ENSG00000097021	ACOT7	0.479114	0.186977	-0.176912	0.881295	0.659244	0.0106467	0.723609	0.00510325	-1.08505	0.00728473	0.843318	0.00156428	0.943038	0.00043838	-0.738443	0.0252395	0.505741	0.0471201	0.539126	0.0362537	-0.606756	0.0541774	0.538711	0.27938	0.413536	0.256177	-1.41196	0.00122074	0.506172	0.323818	1.22594	0.000676809	-0.52659	0.140426
ENSG00000101473	ACOT8	-0.0180963	0.979933	-0.187109	0.843837	0.507391	0.03424	0.790334	0.000761296	0.0266972	0.959388	0.42488	0.0808073	0.707767	0.00260802	0.11494	0.761337	0.412488	0.0916223	0.636198	0.00787296	0.29902	0.342979	0.284738	0.547081	0.361271	0.264932	0.00619101	0.989985	0.155738	0.868313	0.942867	0.00244609	0.305341	0.341348
ENSG00000123130	ACOT9	-0.015198	0.980813	0.192914	0.471121	-1.50586	1.11258e-10	-1.84762	2.718e-12	-0.0382681	0.932646	-1.33303	1.13921e-09	-1.72384	9.85903e-12	0.00626505	0.988517	-1.05474	3.82327e-07	-1.26195	5.46723e-09	-0.0760567	0.81865	0.0443431	0.861864	-1.15211	4.06306e-07	-0.690318	0.000408687	-0.0657936	0.899902	-0.804435	1.02025e-05	-0.480352	0.00372937
ENSG00000161533	ACOX1	-0.109192	0.820998	-0.0161846	0.990195	-0.527341	0.0121771	-0.323	0.13332	0.208937	0.565641	-0.482878	0.0227756	-0.320328	0.135501	0.0424056	0.908254	-0.692798	0.000989448	-0.55621	0.0088548	0.144888	0.637945	-0.295839	0.158208	-0.745654	5.92516e-05	-0.132006	0.451387	-0.0999555	0.762119	-0.763135	3.0271e-05	-0.172708	0.254779
ENSG00000168306	ACOX2	0.83163	0.0503235	-1.04357	0.020492	-1.81793	6.82269e-06	-2.08515	1.14817e-06	0.805203	0.0877091	-1.69542	1.16768e-05	-2.01713	1.09302e-06	0.696193	0.0871822	-1.95361	1.16649e-06	-2.48803	3.47542e-08	0.767624	0.0486675	0.855422	0.0558473	-0.0557413	0.887702	-0.548029	0.159991	0.373494	0.505639	-0.00095195	0.997897	-0.499664	0.145101
ENSG00000087008	ACOX3	-0.235131	0.58282	0.209956	0.457374	-0.379312	0.110449	-0.1059	0.679808	0.000590952	0.998694	-0.0991697	0.70165	0.307025	0.199204	0.158921	0.650872	-0.274186	0.262288	-0.0711121	0.790292	0.0232648	0.953231	-0.235577	0.317088	-0.175462	0.307769	-0.427204	0.0229528	-0.233867	0.338538	-0.0755409	0.648752	-0.611272	0.000937764
ENSG00000143727	ACP1	0.34618	0.305197	0.00284744	0.998094	-0.520287	0.0172203	-0.402099	0.068749	-0.158741	0.693496	-0.746907	0.000529303	-0.696657	0.00118589	-0.369607	0.198054	-0.669472	0.00204401	-0.54137	0.013709	-0.359539	0.196576	-0.0679362	0.796054	-0.216927	0.204981	-0.0305866	0.897	-0.200754	0.467385	-0.280223	0.0724647	-0.28588	0.0857971
ENSG00000134575	ACP2	0.268807	0.466864	-0.318588	0.249402	-0.276824	0.215982	-0.262797	0.239952	-0.13223	0.749855	-0.347452	0.115916	-0.297435	0.178451	-0.236075	0.438356	-0.377973	0.0868726	-0.289948	0.20014	-0.0415579	0.909802	0.153064	0.597952	-0.516188	0.0107075	0.291868	0.170278	0.138673	0.728513	-0.338556	0.0609146	0.241038	0.196671
ENSG00000102575	ACP5	NA	NA	NA	NA	NA	NA	NA	NA	NA	NA	NA	NA	NA	NA	NA	NA	NA	NA	NA	NA	NA	NA	3.65018	8.75371e-05	2.91867	0.000183384	NA	NA	3.39854	0.00011739	3.839	3.20192e-06	NA	NA
ENSG00000162836	ACP6	-0.420839	0.336487	0.406265	0.133133	-0.372262	0.205686	0.245124	0.41189	0.301936	0.513477	0.217535	0.480899	0.601922	0.0351347	0.593295	0.0916965	0.0827304	0.79898	0.159532	0.616004	0.674968	0.0477316	0.228284	0.427873	-0.278109	0.168383	0.593663	0.00896957	0.391056	0.130675	0.262501	0.153077	0.948179	5.46919e-05
ENSG00000183760	ACP7	NA	NA	NA	NA	NA	NA	NA	NA	NA	NA	NA	NA	NA	NA	NA	NA	NA	NA	NA	NA	NA	NA	NA	NA	NA	NA	NA	NA	1.34875	0.0644847	NA	NA	NA	NA
ENSG00000155893	ACPL2	-0.158714	0.80859	NA	NA	0.180146	0.572828	0.239644	0.442647	0.466344	0.282478	0.101964	0.757989	0.0593449	0.860162	0.82741	0.0178123	0.436609	0.159392	0.267551	0.408466	0.515846	0.169185	NA	NA	NA	NA	NA	NA	NA	NA	NA	NA	NA	NA
ENSG00000014257	ACPP	NA	NA	2.14019	0.0152644	NA	NA	NA	NA	NA	NA	NA	NA	NA	NA	NA	NA	NA	NA	NA	NA	NA	NA	-0.15223	0.893183	-1.57707	0.0274716	-0.282321	0.739242	NA	NA	NA	NA	NA	NA
ENSG00000111644	ACRBP	-2.1277	0.00050333	NA	NA	2.53382	6.53037e-07	2.01647	1.89053e-05	0.907494	0.122451	2.70475	2.01084e-06	2.32493	1.9659e-05	2.29248	0.000559282	3.68095	1.24969e-07	3.25535	1.07324e-06	NA	NA	NA	NA	1.66312	6.29013e-05	NA	NA	NA	NA	1.22509	0.00101463	NA	NA
ENSG00000147174	ACRC	-0.462351	0.448938	NA	NA	-1.8453	2.99658e-05	-2.01738	9.40356e-06	0.194291	0.77616	-2.06428	1.16681e-05	-2.41869	1.29655e-06	0.31086	0.552273	-1.13638	0.00639547	-1.69323	0.00018985	0.459658	0.358791	NA	NA	NA	NA	NA	NA	NA	NA	NA	NA	NA	NA
ENSG00000103740	ACSBG1	NA	NA	NA	NA	11.9265	1.44767e-08	11.3376	4.56004e-08	NA	NA	9.11764	1.44455e-08	9.04115	1.524e-08	NA	NA	5.93719	1.79185e-07	4.21325	1.64038e-05	NA	NA	NA	NA	NA	NA	NA	NA	NA	NA	NA	NA	NA	NA
ENSG00000167107	ACSF2	0.220374	0.794237	0.381485	0.226381	5.12684	7.32991e-14	5.36306	4.30274e-14	0.688511	0.218799	5.18592	6.20884e-14	5.38721	3.39904e-14	1.28737	0.00541641	2.31066	1.38648e-08	2.44544	5.98951e-09	1.02815	0.00553764	-0.0302432	0.940591	0.807779	0.000888812	-0.376474	0.125166	0.383417	0.185657	1.3479	9.62468e-07	0.119129	0.610707
ENSG00000176715	ACSF3	-0.0998835	0.860913	0.12387	0.872793	-0.139698	0.591446	-0.0342355	0.899991	0.135236	0.767985	-0.279882	0.263735	-0.100901	0.699808	0.186326	0.598722	-0.0888177	0.740677	-0.414854	0.0900269	0.265909	0.405867	0.102832	0.782454	-0.931553	0.000539665	0.25739	0.356972	0.157903	0.776576	-0.36209	0.102466	0.45073	0.0548463
ENSG00000151726	ACSL1	0.0814822	0.874515	-0.400671	0.541431	1.06223	5.73454e-07	1.32332	4.12648e-09	-0.0655496	0.882442	1.2234	1.8017e-08	1.46367	6.50045e-10	-0.420984	0.130746	-0.0387086	0.875798	0.044233	0.861545	-0.47452	0.0728432	0.589301	0.240163	1.44304	0.000441402	0.981707	0.0148017	0.741145	0.0950413	0.509394	0.136378	0.526306	0.137356
ENSG00000123983	ACSL3	0.277996	0.428016	-0.0104663	0.998094	1.41121	3.42995e-08	1.28436	1.80607e-07	-0.144163	0.716421	1.91958	1.61961e-10	1.96645	1.03407e-10	0.0225453	0.953618	1.49339	2.07248e-08	1.50232	1.9916e-08	0.120935	0.704315	-0.740399	0.355824	1.64796	0.00578059	-1.09327	0.073819	-0.571572	0.547727	0.760555	0.146125	-1.391	0.0167945
ENSG00000068366	ACSL4	0.707018	0.00359803	-0.143689	0.956032	0.30384	0.157943	0.218096	0.318547	-0.0885867	0.833164	-0.53038	0.0111775	-0.557835	0.00701577	-0.147166	0.63825	-0.609371	0.00359444	-0.508068	0.0162655	-0.424893	0.0988157	-0.482452	0.54233	0.388714	0.47446	-0.206979	0.760069	-0.233139	0.88659	-0.231001	0.66491	-0.511498	0.340816
ENSG00000197142	ACSL5	NA	NA	0.266334	0.883569	1.83163	0.0101633	1.59356	0.0237761	0.514942	0.686264	4.56876	1.00294e-06	4.3804	1.78546e-06	0.894958	0.395279	3.54538	3.94445e-05	2.54755	0.00144352	NA	NA	0.813796	0.296024	0.0699443	0.911824	0.12147	0.872499	0.380845	0.759959	-0.627027	0.246565	-0.63982	0.266619
ENSG00000164398	ACSL6	NA	NA	NA	NA	7.63351	5.06625e-09	7.0782	1.80066e-08	NA	NA	11.5469	2.20343e-09	11.3618	2.8245e-09	NA	NA	6.34437	1.47261e-08	5.78114	5.88085e-08	NA	NA	5.03877	1.17035e-05	7.33604	8.37553e-09	NA	NA	5.40489	1.02319e-06	7.02848	1.83157e-09	NA	NA
ENSG00000005187	ACSM3	-1.42354	0.00866857	NA	NA	2.68467	3.58031e-08	3.07658	3.95982e-09	-0.655848	0.279831	3.97294	1.78305e-10	4.47262	2.09018e-11	NA	NA	4.81358	1.97526e-11	5.01795	1.03874e-11	NA	NA	1.4912	0.00767743	2.29859	2.30658e-05	1.51993	0.0027211	NA	NA	2.12203	3.377e-05	NA	NA
ENSG00000183549	ACSM5	0.538004	0.598179	NA	NA	-1.36935	0.0229936	-2.14228	0.000994425	0.703674	0.431572	0.116651	0.850046	-1.53794	0.0102393	1.31513	0.0679075	2.98224	3.49951e-05	1.9153	0.00331437	1.01882	0.199962	NA	NA	NA	NA	NA	NA	NA	NA	NA	NA	NA	NA
ENSG00000154930	ACSS1	0.0362123	0.964089	1.14712	0.0733209	0.21212	0.493136	-0.699667	0.0152405	-0.0780206	0.89351	0.0369034	0.910675	-0.435535	0.141408	0.487717	0.181515	1.02442	0.000416629	0.369483	0.229393	0.605492	0.0896355	-0.598677	0.397903	-1.29207	0.0126119	-0.293059	0.627208	-0.891428	0.219088	-1.19011	0.0203481	1.13946	0.0223797
ENSG00000131069	ACSS2	-0.108598	0.866534	-0.54012	0.00488283	0.559606	0.0433582	0.85486	0.0033151	0.0770966	0.890693	0.925455	0.00152787	1.14365	0.000194601	0.198391	0.627348	0.745818	0.00897902	0.822271	0.00457509	0.397788	0.275842	0.332072	0.0943086	0.95768	2.47284e-06	0.0698887	0.716106	0.382345	0.031431	0.817661	7.27227e-06	-0.130974	0.401356
ENSG00000111058	ACSS3	NA	NA	0.308553	0.830145	4.72278	5.8296e-09	4.67854	6.82935e-09	NA	NA	4.11573	1.96175e-07	4.09447	1.84619e-07	NA	NA	2.08966	4.3802e-05	1.73089	0.000380589	0.771068	0.158279	1.02334	0.131322	0.979403	0.0564329	1.32476	0.0182311	1.15838	0.0544137	0.499231	0.303838	1.57802	0.00280246
ENSG00000143632	ACTA1	NA	NA	-0.107266	0.948772	NA	NA	NA	NA	NA	NA	NA	NA	2.34638	0.00110747	NA	NA	NA	NA	NA	NA	NA	NA	0.352272	0.508428	0.636625	0.0767608	-0.794351	0.0472852	0.373428	0.528437	0.960813	0.00514887	-0.460683	0.201758
ENSG00000107796	ACTA2	-3.47063	1.53223e-06	0.217887	0.754975	-3.80286	3.54584e-08	-3.72575	5.22781e-08	0.0940991	0.924393	-3.32468	2.79243e-07	-3.42914	1.78141e-07	0.519916	0.420012	-1.63353	0.00162871	-2.01382	0.000228749	0.411323	0.52481	0.294131	0.480183	-1.70698	5.65174e-06	-0.0452901	0.90951	0.0214755	0.989301	-1.0513	0.000428506	-0.486315	0.0839311
ENSG00000075624	ACTB	0.245045	0.537644	-0.189439	0.926992	-0.0811174	0.742124	-0.342477	0.130762	-0.40927	0.215873	0.098372	0.689218	-0.0523542	0.834296	-0.253189	0.418058	-0.396741	0.0801005	-0.459005	0.0423526	-0.330328	0.252931	0.374517	0.632956	-0.253795	0.647044	-1.10836	0.0573205	0.2486	0.872142	0.870361	0.0696026	-0.445693	0.404979
ENSG00000169067	ACTBL2	NA	NA	-2.68524	0.000900989	10.8392	3.00069e-13	9.53502	2.39976e-12	NA	NA	10.9557	3.81217e-13	10.0879	1.33009e-12	NA	NA	7.07298	2.88786e-11	6.05818	3.09996e-10	0.0276519	0.978898	4.78673	2.82414e-06	8.6508	1.17091e-09	1.48571	0.0236995	2.6399	0.000159563	4.69215	5.19925e-08	-0.286077	0.63298
ENSG00000229145	ACTBP1	NA	NA	-0.381731	0.712597	NA	NA	NA	NA	NA	NA	NA	NA	NA	NA	NA	NA	NA	NA	NA	NA	NA	NA	0.0543975	0.949593	-0.0164472	0.976138	-1.12777	0.0318699	0.140037	0.936172	0.722275	0.0781572	-0.789929	0.0882168
ENSG00000188460	ACTBP11	NA	NA	-0.123741	0.909502	NA	NA	NA	NA	NA	NA	NA	NA	NA	NA	NA	NA	NA	NA	NA	NA	NA	NA	0.307259	0.493095	0.110019	0.740145	-1.09984	0.0023711	0.443095	0.294322	0.831729	0.00423134	-0.436708	0.147992
ENSG00000233125	ACTBP12	NA	NA	NA	NA	NA	NA	NA	NA	NA	NA	NA	NA	NA	NA	NA	NA	-0.209355	0.658082	-0.919312	0.0293119	-0.437072	0.388642	0.602877	0.403762	0.460985	0.366522	NA	NA	0.54292	0.512813	1.11962	0.0151978	NA	NA
ENSG00000213763	ACTBP2	0.170863	0.849448	-0.0518405	0.984222	-0.377561	0.405376	-0.723853	0.0905156	-0.728141	0.224941	-0.00436813	0.992456	0.0686913	0.883591	-0.31848	0.565678	-0.777467	0.0911336	-0.46243	0.311101	-1.0361	0.0482787	0.350826	0.502393	-0.102026	0.793198	-1.15797	0.0047446	0.440657	0.405616	0.723663	0.0269693	-0.936154	0.0105719
ENSG00000185607	ACTBP7	NA	NA	0.0185113	0.995595	NA	NA	NA	NA	NA	NA	NA	NA	NA	NA	NA	NA	NA	NA	NA	NA	NA	NA	0.161932	0.834655	0.620394	0.188634	-0.723616	0.175772	0.532916	0.482041	1.00429	0.0232489	-0.213832	0.682295
ENSG00000220267	ACTBP8	NA	NA	-0.579771	0.444138	NA	NA	NA	NA	NA	NA	NA	NA	NA	NA	NA	NA	NA	NA	NA	NA	NA	NA	0.497301	0.455074	0.273236	0.566488	-0.806826	0.118679	0.373047	0.673584	0.668134	0.104896	-0.0352225	0.948015
ENSG00000266920	ACTBP9	NA	NA	-0.0771678	0.967703	NA	NA	NA	NA	NA	NA	NA	NA	NA	NA	NA	NA	NA	NA	NA	NA	NA	NA	0.308386	0.556474	0.204474	0.582534	-0.9888	0.0148598	0.356328	0.561526	0.830228	0.0124328	-0.243288	0.510904
ENSG00000159251	ACTC1	-0.767214	0.590865	NA	NA	-0.052613	0.951604	-1.21515	0.135072	-0.281527	0.85384	1.45277	0.0705401	0.768557	0.339697	NA	NA	0.473263	0.542976	-0.871776	0.261997	0.606938	0.543165	NA	NA	0.338935	0.342651	NA	NA	0.758796	0.0599972	0.752	0.0173272	NA	NA
ENSG00000184009	ACTG1	0.213696	0.610866	-0.140507	0.901731	0.292631	0.20272	0.131581	0.586237	-0.125189	0.772815	0.144762	0.5495	0.0534223	0.83077	0.0269109	0.94761	-0.269803	0.24604	-0.236704	0.317835	-0.122926	0.717688	0.339804	0.479343	0.441725	0.181475	-0.18115	0.658124	0.314608	0.588262	1.00799	0.00172315	-0.154227	0.659893
ENSG00000178631	ACTG1P1	NA	NA	-0.438683	0.603488	NA	NA	NA	NA	NA	NA	NA	NA	NA	NA	NA	NA	NA	NA	NA	NA	NA	NA	0.217444	0.744187	0.463986	0.288925	-0.474532	0.345967	0.00852722	0.998212	0.657992	0.0955656	-0.640663	0.140899
ENSG00000231340	ACTG1P10	NA	NA	-0.243278	0.867497	NA	NA	NA	NA	NA	NA	NA	NA	NA	NA	NA	NA	NA	NA	NA	NA	NA	NA	0.695617	0.276094	0.712845	0.121814	-0.229515	0.695903	0.375603	0.679188	1.08102	0.0119105	NA	NA
ENSG00000226642	ACTG1P12	NA	NA	NA	NA	NA	NA	NA	NA	NA	NA	NA	NA	NA	NA	NA	NA	NA	NA	NA	NA	NA	NA	0.591975	0.507359	0.703929	0.241648	NA	NA	0.523787	0.6371	0.899718	0.0996456	NA	NA
ENSG00000230581	ACTG1P14	NA	NA	-0.273861	0.75346	NA	NA	NA	NA	NA	NA	NA	NA	NA	NA	NA	NA	NA	NA	NA	NA	NA	NA	0.0121531	0.986641	0.323272	0.377016	-0.893213	0.0264627	0.124568	0.924787	0.720803	0.0294306	-0.379726	0.29081
ENSG00000259904	ACTG1P15	NA	NA	-0.153934	0.917939	NA	NA	NA	NA	NA	NA	NA	NA	NA	NA	NA	NA	NA	NA	NA	NA	NA	NA	0.241857	0.693147	0.413819	0.313778	-1.30275	0.00641462	0.273605	0.76097	0.805755	0.0311853	-0.657614	0.108748
ENSG00000237999	ACTG1P19	NA	NA	-0.27165	0.808654	NA	NA	NA	NA	NA	NA	NA	NA	NA	NA	NA	NA	NA	NA	NA	NA	NA	NA	0.520453	0.372656	0.131682	0.770193	-1.10383	0.0191689	0.232611	0.822414	0.709868	0.0581877	-0.811371	0.0527231
ENSG00000241547	ACTG1P20	NA	NA	0.0735962	0.964526	NA	NA	NA	NA	NA	NA	NA	NA	NA	NA	NA	NA	NA	NA	NA	NA	NA	NA	0.196666	0.684218	0.291642	0.373623	-0.750886	0.0349075	0.41841	0.368833	1.02705	0.00125184	-0.113421	0.745202
ENSG00000230362	ACTG1P23	NA	NA	-0.612558	0.344494	NA	NA	NA	NA	NA	NA	NA	NA	NA	NA	NA	NA	NA	NA	NA	NA	NA	NA	0.674841	0.239224	0.313241	0.469288	-1.20729	0.0151581	0.193625	0.87649	0.742923	0.0499435	-0.437249	0.301361
ENSG00000226359	ACTG1P24	NA	NA	-0.783997	0.282912	NA	NA	NA	NA	NA	NA	NA	NA	NA	NA	NA	NA	NA	NA	NA	NA	NA	NA	NA	NA	0.694356	0.16339	NA	NA	0.113224	0.954589	0.376697	0.411314	-1.10103	0.034735
ENSG00000215388	ACTG1P3	0.241943	0.79739	0.000408756	0.999513	0.207964	0.67629	0.791951	0.0683988	0.190561	0.818971	NA	NA	0.196775	0.678678	NA	NA	-0.0320638	0.950918	0.227246	0.640364	0.140692	0.83159	-0.333738	0.538029	0.364187	0.312403	-0.553359	0.160553	0.104242	0.938859	0.803229	0.0172884	NA	NA
ENSG00000236085	ACTG1P4	NA	NA	-0.236195	0.823966	NA	NA	1.57297	0.00555971	NA	NA	NA	NA	NA	NA	NA	NA	NA	NA	NA	NA	NA	NA	0.299091	0.592244	0.459174	0.223472	-0.519305	0.219846	0.302312	0.681129	1.06692	0.00300817	-0.0223765	0.959758
ENSG00000229349	ACTG1P9	NA	NA	-0.236397	0.833704	NA	NA	NA	NA	NA	NA	NA	NA	NA	NA	NA	NA	0.117435	0.810051	0.0589223	0.90502	-0.0553859	0.936246	0.394311	0.4953	0.512504	0.191212	-0.500075	0.262661	0.278464	0.734717	0.844119	0.0200017	-0.432261	0.273875
ENSG00000163017	ACTG2	-1.99637	2.50079e-05	0.999932	0.517203	-2.59107	4.53166e-08	-2.41281	1.58305e-07	-0.199586	0.754011	-2.19936	6.3327e-07	-1.93221	4.19143e-06	0.306103	0.527547	NA	NA	NA	NA	NA	NA	0.532497	0.686619	-0.136073	0.8903	-3.21112	0.00350623	0.113077	0.980213	0.964676	0.236156	-1.30328	0.146982
ENSG00000182584	ACTL10	0.0795683	0.939686	-0.231925	0.895858	-0.162321	0.725625	-1.29529	0.0053908	-0.341798	0.644074	-0.986097	0.0299141	-1.04599	0.0200437	-0.178585	0.781318	NA	NA	NA	NA	NA	NA	0.0688222	0.942943	-0.970988	0.0739056	0.536277	0.367713	-0.185714	0.923957	-0.693183	0.169433	1.06751	0.0332639
ENSG00000136518	ACTL6A	0.108342	0.821926	0.283006	0.239318	-0.229065	0.300027	0.244268	0.263478	-0.686568	0.0194471	-0.371235	0.084109	0.0142317	0.953985	-0.653142	0.0109751	-0.255823	0.248071	-0.0457431	0.853055	-0.475168	0.0659378	0.0251868	0.933284	0.0564469	0.761332	-1.03746	1.13235e-05	-0.0798839	0.872705	0.229121	0.138043	-0.886708	2.54188e-05
ENSG00000077080	ACTL6B	NA	NA	NA	NA	10.886	4.1505e-10	10.8315	4.6134e-10	NA	NA	10.2416	1.36958e-09	10.3797	9.29606e-10	NA	NA	9.20043	2.37842e-08	7.65897	1.46295e-06	NA	NA	NA	NA	NA	NA	NA	NA	NA	NA	NA	NA	NA	NA
ENSG00000117148	ACTL8	NA	NA	NA	NA	4.02961	1.52397e-05	NA	NA	NA	NA	3.06979	2.62393e-05	2.27737	0.000943671	NA	NA	NA	NA	NA	NA	NA	NA	NA	NA	NA	NA	NA	NA	NA	NA	NA	NA	NA	NA
ENSG00000072110	ACTN1	0.16198	0.716607	-0.00287007	0.998094	-1.51051	1.61461e-08	-2.01352	1.02056e-10	-0.469486	0.132761	-1.26203	3.27158e-07	-1.63047	4.23536e-09	-0.2042	0.513941	-1.03557	8.53488e-06	-1.02443	1.07416e-05	-0.293315	0.300122	-0.412046	0.0474763	-1.14429	8.64295e-07	-1.30884	4.58281e-07	-0.327052	0.116716	-0.614123	0.000394726	-1.26759	3.1441e-07
ENSG00000259062	ACTN1-AS1	NA	NA	NA	NA	3.3673	7.37754e-06	2.61676	0.000251172	NA	NA	1.94229	0.000575416	1.51973	0.00511887	NA	NA	2.47668	4.61017e-05	1.57586	0.00460823	NA	NA	NA	NA	NA	NA	NA	NA	NA	NA	NA	NA	NA	NA
ENSG00000077522	ACTN2	NA	NA	NA	NA	8.31139	4.7793e-06	7.62645	2.94446e-05	NA	NA	NA	NA	6.28858	1.24145e-05	NA	NA	3.79317	7.58721e-05	NA	NA	NA	NA	NA	NA	NA	NA	NA	NA	NA	NA	NA	NA	NA	NA
ENSG00000130402	ACTN4	0.0135231	0.983869	-0.352335	0.308325	-1.13586	1.20684e-07	-1.24376	2.98399e-08	-0.272505	0.442282	-0.839073	9.09767e-05	-0.909931	1.98067e-05	0.134817	0.685324	-0.588454	0.0069209	-0.521907	0.0177268	0.109333	0.743882	-0.326947	0.307206	-0.295335	0.205325	-0.963186	0.00058706	-0.32276	0.330978	-0.0309401	0.894813	-0.609638	0.00924721
ENSG00000213493	ACTN4P1	-0.184094	0.838829	-0.157421	0.883118	-1.58883	0.000688623	-1.647	0.00041951	-0.874243	0.14981	-0.732432	0.0872699	-0.656233	0.118648	0.462131	0.388117	-0.240825	0.621166	-0.1858	0.700225	-0.216279	0.736528	-0.282856	0.558438	-0.466323	0.156429	-1.07756	0.00438398	-0.184759	0.827101	0.192923	0.538217	-0.439015	0.17272
ENSG00000131966	ACTR10	-0.0274821	0.963207	-0.132094	0.544306	0.182511	0.409549	0.243623	0.258716	-0.0962957	0.816078	0.1318	0.561237	0.212934	0.326405	-0.115858	0.717676	0.187408	0.40138	0.40921	0.0548768	0.190425	0.51186	0.0626569	0.736203	0.276644	0.0252991	-0.268568	0.0404183	0.0914615	0.703469	0.356082	0.00326539	-0.406264	0.00167677
ENSG00000138107	ACTR1A	0.16992	0.681527	-0.281511	0.566286	-1.01645	8.06689e-07	-1.0446	3.99437e-07	-0.311954	0.337964	-0.878091	2.01052e-05	-0.987964	1.49181e-06	-0.291311	0.302086	-0.790977	0.000144845	-0.713444	0.000644954	-0.212485	0.458899	0.0638259	0.880884	-0.732976	0.0067896	-0.658524	0.022716	-0.0371652	0.979107	-0.349674	0.14039	-0.46706	0.0666891
ENSG00000115073	ACTR1B	0.328028	0.321133	-0.00733292	0.995675	0.421196	0.0487507	0.377021	0.0786637	0.214275	0.555025	0.0932782	0.690915	0.112891	0.622418	0.133535	0.679391	0.0981184	0.678443	-0.0685743	0.778461	0.307608	0.266247	0.308727	0.305838	-0.00117415	0.99651	-0.171316	0.51336	0.00375529	0.99867	-0.165698	0.426072	-0.0549598	0.821905
ENSG00000138071	ACTR2	0.22742	0.554194	0.13003	0.951913	-0.748691	0.000360715	-0.953165	5.30006e-06	-0.327839	0.319635	-0.881323	2.62558e-05	-1.07062	3.22712e-07	-0.284665	0.325597	-0.669198	0.00163272	-0.569017	0.00798451	-0.329683	0.228084	-0.436967	0.524776	-0.220363	0.650822	-0.985275	0.0487222	-0.177123	0.908494	-0.793429	0.0740538	-1.37598	0.00505245
ENSG00000115091	ACTR3	0.0983728	0.842284	0.235866	0.511653	-2.28774	4.96238e-11	-2.65396	3.22493e-12	-0.494287	0.100673	-2.03185	4.53151e-10	-2.44026	1.39853e-11	-0.33204	0.234895	-1.66241	2.3768e-08	-1.65517	2.70862e-08	-0.436896	0.092251	-0.483667	0.0750049	-1.4481	1.08029e-06	-0.981257	0.00018679	-0.625764	0.0128738	-1.43699	5.82171e-07	-1.33163	3.91764e-06
ENSG00000133627	ACTR3B	0.255103	0.662577	-0.141939	0.851573	0.451602	0.154555	0.732918	0.0171239	-0.0139713	0.983691	0.0797558	0.819925	0.374594	0.240836	-0.4821	0.217299	-0.360263	0.265804	-0.375062	0.247237	-0.400401	0.311171	0.0363442	0.936827	0.562263	0.0302297	-0.120114	0.710227	-0.296328	0.475806	0.0261179	0.922041	-0.696697	0.00852288
ENSG00000101442	ACTR5	0.202217	0.71229	0.413681	0.0933254	-0.158068	0.595003	0.293438	0.300258	-0.398718	0.340266	-0.184057	0.535314	0.282099	0.321851	-0.481346	0.165672	0.661247	0.0157086	0.746781	0.00621145	-0.3443	0.337229	-0.291566	0.272969	-0.0701997	0.738535	-0.323536	0.124335	-0.211571	0.498675	0.229696	0.197861	-0.0512787	0.807521
ENSG00000075089	ACTR6	-0.1582	0.75666	0.0576945	0.963491	-0.655643	0.00562763	-0.107981	0.680631	-0.264695	0.501129	-0.438505	0.0710028	-0.0242544	0.931081	-0.0507166	0.902183	-0.00759121	0.977939	0.232697	0.361212	0.345097	0.262542	0.109664	0.782875	0.0454109	0.871658	-0.13536	0.656194	0.272454	0.490811	-0.260674	0.289106	-0.444206	0.0741271
ENSG00000113812	ACTR8	0.117318	0.819351	0.0429714	0.944353	-0.767367	0.000494082	-0.392932	0.0826301	0.0305742	0.950963	-1.02496	3.20616e-06	-0.568376	0.0103803	-0.145264	0.669254	-0.460295	0.0417936	-0.290735	0.215426	-0.0531947	0.886942	-0.196961	0.31036	-0.613789	0.000162121	0.12291	0.449391	-0.102752	0.726552	-0.602445	9.46774e-05	0.11821	0.40082
ENSG00000184378	ACTRT3	-0.497779	0.343765	0.402439	0.367196	-1.43118	0.000256651	-2.11768	1.76003e-06	0.0463502	0.94951	-1.06211	0.00471421	-1.79909	2.02543e-05	0.157653	0.762431	NA	NA	NA	NA	NA	NA	-0.591441	0.131051	-2.34626	2.58406e-07	0.407327	0.205386	-0.230539	0.699068	-2.28871	2.56021e-07	0.58935	0.0387915
ENSG00000115170	ACVR1	-0.317338	0.339495	0.146372	0.844878	0.400859	0.0596038	-0.0320089	0.893684	0.27056	0.426222	0.0382912	0.872057	-0.379217	0.0742864	0.324017	0.249186	-0.334448	0.123981	-0.540899	0.0107761	-0.25568	0.36319	-0.431605	0.241845	-0.342053	0.202044	-0.18024	0.564776	-0.244665	0.600743	-0.408179	0.113195	-0.369587	0.157606
ENSG00000135503	ACVR1B	-0.00377733	0.996075	-0.0983311	0.988956	-0.0618747	0.832666	-0.477589	0.0720452	0.125517	0.806974	0.0282717	0.924141	-0.249251	0.366334	0.372317	0.285402	0.113742	0.695533	-0.248898	0.374817	0.497191	0.125481	-0.531344	0.662861	0.745763	0.362607	0.879507	0.336284	0.0824968	0.985407	-0.19686	0.813836	0.602426	0.460507
ENSG00000123612	ACVR1C	NA	NA	NA	NA	2.99919	3.85147e-06	2.46057	4.95184e-05	0.949122	0.24316	4.11944	2.07557e-07	4.2756	9.63103e-08	NA	NA	4.8137	1.61419e-07	4.13991	2.20134e-06	NA	NA	NA	NA	NA	NA	NA	NA	NA	NA	NA	NA	NA	NA
ENSG00000121989	ACVR2A	-0.0480479	0.945804	0.391051	0.690765	0.878426	0.000840601	0.947803	0.000304512	0.0419057	0.941295	1.06478	5.34231e-05	1.16912	8.64856e-06	0.0800303	0.858274	0.951109	0.000326995	0.75818	0.00449585	-0.487552	0.146435	-1.20169	0.0412791	0.851729	0.0612033	-0.435004	0.403673	-0.243861	0.843189	0.271743	0.544334	-0.412726	0.376872
ENSG00000114739	ACVR2B	-0.320934	0.61497	NA	NA	0.0546228	0.892547	-0.283845	0.45356	0.353563	0.527661	-0.0802702	0.846112	-0.157036	0.690635	0.838958	0.0418493	-0.0268263	0.949071	-0.304818	0.443761	0.89106	0.0316038	NA	NA	0.199955	0.658721	1.57065	0.00127729	NA	NA	NA	NA	1.35411	0.00278139
ENSG00000229589	ACVR2B-AS1	NA	NA	NA	NA	1.56584	0.000362019	1.31083	0.00214012	1.01947	0.0864537	1.79747	0.000124255	2.10163	1.48496e-05	1.60113	0.00407772	1.75211	0.000155307	1.8026	0.000108693	1.93303	0.000484903	NA	NA	1.26625	0.00779589	2.57904	1.63047e-05	NA	NA	NA	NA	3.26045	8.7036e-07
ENSG00000139567	ACVRL1	NA	NA	-0.234625	0.783624	8.40577	1.60259e-05	NA	NA	NA	NA	NA	NA	NA	NA	NA	NA	0.93644	0.222737	NA	NA	1.21165	0.19112	1.01457	0.0162744	-0.837383	0.0145388	1.17973	0.00220354	0.937668	0.0146448	-0.827685	0.0110003	0.957082	0.00465534
ENSG00000243989	ACY1	0.102416	0.855901	0.0441631	0.982637	-1.22778	2.69484e-07	-1.16583	7.67117e-07	0.118128	0.800524	-0.853515	0.000301533	-0.774806	0.000980373	0.311304	0.338232	-0.674451	0.00472261	-0.58429	0.0151185	0.430778	0.150233	0.0309072	0.954492	-1.09374	0.000633628	-0.215981	0.534602	0.0629106	0.959822	-0.244674	0.364062	0.055698	0.864981
ENSG00000119640	ACYP1	0.0581443	0.937038	0.00188435	0.999513	-0.0724262	0.823807	-0.0818305	0.80038	0.0437415	0.943226	0.112719	0.728069	0.147414	0.640494	-0.162195	0.707965	-0.0569874	0.864254	0.222993	0.480855	-0.102558	0.822966	-0.302807	0.524171	0.435488	0.175353	-1.11994	0.00318968	-0.311485	0.600087	1.12215	0.000494615	-0.26546	0.421998
ENSG00000170634	ACYP2	-0.4533	0.379486	-0.659561	0.229808	-1.14915	0.000671327	-1.13608	0.000689907	0.62613	0.173549	-0.746169	0.0322511	-0.479112	0.169786	0.913386	0.0176853	-0.861196	0.0126105	-0.715207	0.0393413	0.565724	0.170311	0.574642	0.271608	-0.894506	0.0227466	0.419874	0.336858	-0.0908253	0.952867	-0.519878	0.142419	0.411136	0.2703
ENSG00000236144	AD000090.2	0.334576	0.483842	NA	NA	-2.09594	1.773e-11	-1.78276	5.12716e-10	-0.0987132	0.861265	-1.96114	5.85449e-11	-1.97704	5.04574e-11	-0.101796	0.82374	-0.788063	0.00575118	-0.953913	0.000788417	0.231889	0.558253	NA	NA	NA	NA	NA	NA	NA	NA	NA	NA	NA	NA
ENSG00000240616	AD000092.3	-0.299676	0.674771	NA	NA	-0.768324	0.0543884	0.718661	0.0575393	-0.272036	0.677384	-0.334388	0.429055	0.686367	0.0763826	0.0123059	0.98661	-0.274303	0.54141	0.0500757	0.915475	0.0135028	0.983478	NA	NA	NA	NA	NA	NA	NA	NA	NA	NA	NA	NA
ENSG00000266974	AD001527.4	0.313087	0.71489	NA	NA	-0.755506	0.127931	-0.823426	0.0840513	-0.0795725	0.932254	-0.35192	0.467657	-1.10882	0.018007	0.0338954	0.964227	NA	NA	NA	NA	NA	NA	NA	NA	NA	NA	NA	NA	NA	NA	NA	NA	NA	NA
ENSG00000196839	ADA	0.469757	0.168748	0.477944	0.237312	0.826066	0.000574615	0.969273	5.14558e-05	-0.352326	0.354434	0.964904	5.32594e-05	1.00379	2.49401e-05	-0.181325	0.615461	0.839842	0.00052372	0.946158	9.33713e-05	-0.241926	0.474799	0.0373691	0.942079	-0.0890646	0.773204	0.590651	0.0574429	0.102794	0.920398	0.591801	0.0244236	0.274046	0.331876
ENSG00000093072	ADA2	NA	NA	0.213659	0.625676	NA	NA	NA	NA	NA	NA	NA	NA	NA	NA	NA	NA	NA	NA	NA	NA	NA	NA	0.343244	0.25777	-0.461348	0.0387637	0.375723	0.119369	0.240418	0.502195	-0.414635	0.0492853	0.673995	0.00306639
ENSG00000168803	ADAL	0.0731811	0.906081	-0.25689	0.459445	-0.0419105	0.883616	0.0119867	0.96722	0.0219701	0.969245	-0.471475	0.0695056	-0.315356	0.230892	-0.0580141	0.89444	-0.0966196	0.736243	-0.141533	0.61852	0.108726	0.785056	0.165523	0.592244	0.58011	0.0075254	0.227175	0.337387	0.257123	0.419264	0.621497	0.00209587	0.510743	0.0123902
ENSG00000137845	ADAM10	-0.0558609	0.914613	-0.483012	0.430147	0.254977	0.249544	0.214524	0.334854	0.229	0.520401	0.319759	0.144233	0.155109	0.492928	0.443959	0.100596	-0.151272	0.512603	0.177519	0.442983	0.607104	0.0156381	-0.318549	0.577533	0.269186	0.493514	0.490678	0.244585	-0.0223837	0.990974	-0.344026	0.35354	-0.0458562	0.917178
ENSG00000073670	ADAM11	0.453716	0.572886	NA	NA	3.41091	1.08022e-08	3.47892	8.35756e-09	-0.693509	0.363351	3.31103	1.3677e-08	3.4782	5.73027e-09	-0.033361	0.966338	2.12288	7.88227e-06	2.01632	1.70904e-05	-0.157855	0.799667	NA	NA	1.08619	0.0350696	NA	NA	NA	NA	1.99493	0.000409046	NA	NA
ENSG00000148848	ADAM12	0.103662	0.857667	-0.731862	0.0154165	-0.878273	0.00126835	-1.14534	6.65043e-05	-0.59567	0.105724	-0.83141	0.00211956	-1.21074	3.12163e-05	-0.359732	0.283165	-1.71947	3.11094e-07	-1.74213	2.77729e-07	-0.657403	0.0351386	-0.363699	0.286921	-0.579385	0.0199799	-1.8815	6.38545e-07	0.17999	0.711856	-0.113481	0.641313	-1.27858	2.68569e-05
ENSG00000143537	ADAM15	-0.0222088	0.970993	-0.206334	0.53552	0.479554	0.0214482	0.674107	0.00101381	-0.10806	0.789161	0.858013	2.70508e-05	1.08147	1.23961e-07	-0.0569298	0.871453	0.377794	0.0769837	0.547734	0.00906543	0.109558	0.730544	0.0715289	0.811852	0.365201	0.0545693	-0.55551	0.00777246	0.172778	0.59559	0.343315	0.0508222	0.0103729	0.962306
ENSG00000151694	ADAM17	-0.390979	0.185207	-0.253945	0.322035	0.307632	0.149898	-0.195789	0.370658	-0.0368719	0.934177	0.587695	0.00449455	0.214415	0.323205	0.0580244	0.869892	0.508172	0.0153879	0.452718	0.0325677	-0.101992	0.749941	-0.197253	0.445813	0.409814	0.0225522	0.00454955	0.985894	-0.28565	0.215285	0.106387	0.545175	-0.0123018	0.952626
ENSG00000135074	ADAM19	-0.536033	0.517932	0.0770129	0.931508	-0.242907	0.631268	-0.671595	0.166721	0.0404132	0.969245	0.284919	0.573864	-0.173071	0.735776	0.11083	0.890162	0.841425	0.0869635	0.421149	0.405212	-1.76605	0.00522617	-0.778849	0.00773856	-0.0757292	0.763177	-1.55531	2.61728e-06	0.0943847	0.893889	0.125179	0.585208	-1.95272	1.42081e-07
ENSG00000229186	ADAM1A	-0.0291655	0.975484	0.117005	0.935851	-1.11368	0.00118177	-0.72363	0.0350594	0.438438	0.388014	-1.04107	0.00263051	-1.12391	0.000983811	0.26562	0.568853	-1.81473	1.01139e-06	-0.923642	0.0101079	0.493178	0.260306	-0.282724	0.592934	-1.02983	0.00673061	0.706078	0.0608609	-0.267324	0.726142	-0.87535	0.0142577	0.952198	0.00651044
ENSG00000259158	ADAM20P1	NA	NA	NA	NA	1.47386	0.00306499	1.3169	0.00693898	1.01604	0.145545	NA	NA	1.1358	0.0205919	1.01729	0.0988642	1.72739	0.00191595	NA	NA	NA	NA	NA	NA	NA	NA	NA	NA	NA	NA	NA	NA	NA	NA
ENSG00000139985	ADAM21	NA	NA	NA	NA	NA	NA	NA	NA	NA	NA	NA	NA	NA	NA	NA	NA	-0.305788	0.512603	-0.237464	0.607359	0.839427	0.0667746	NA	NA	NA	NA	NA	NA	NA	NA	NA	NA	NA	NA
ENSG00000008277	ADAM22	0.0524362	0.959425	NA	NA	4.10725	5.336e-15	4.11009	5.90971e-15	0.782629	0.124021	3.62768	5.38343e-14	3.7457	2.81603e-14	0.255889	0.631751	1.89473	4.79426e-09	1.67326	1.82028e-07	0.752176	0.0463411	NA	NA	3.9567	0.00089235	NA	NA	NA	NA	NA	NA	NA	NA
ENSG00000114948	ADAM23	NA	NA	-0.0305226	0.993471	4.87935	1.61562e-11	4.82775	1.91615e-11	NA	NA	5.64003	3.41083e-12	5.40632	6.1784e-12	NA	NA	1.35721	0.000367075	0.967111	0.00745559	0.0984086	0.854636	-0.110312	0.890284	0.195178	0.700741	-0.380059	0.49537	0.388672	0.670504	-0.102594	0.837168	-0.235201	0.643995
ENSG00000042980	ADAM28	NA	NA	NA	NA	3.40599	7.99718e-06	2.72658	0.000159705	NA	NA	NA	NA	NA	NA	NA	NA	NA	NA	NA	NA	NA	NA	NA	NA	NA	NA	NA	NA	NA	NA	NA	NA	NA	NA
ENSG00000197140	ADAM32	-0.344081	0.592392	NA	NA	0.22158	0.574658	0.368569	0.325826	0.181677	0.784164	0.590388	0.116145	0.329591	0.392344	0.560443	0.210886	0.0310545	0.940142	-0.252084	0.520333	-0.351617	0.454961	NA	NA	NA	NA	0.786412	0.0519246	NA	NA	NA	NA	1.23654	0.00183696
ENSG00000149451	ADAM33	-7.17276	2.98861e-08	-0.422858	0.413426	0.693798	0.168225	-0.491682	0.332808	0.052535	0.957215	NA	NA	NA	NA	NA	NA	5.48255	2.3073e-06	NA	NA	NA	NA	0.649773	0.12508	0.0430395	0.90601	0.729076	0.0370192	0.594683	0.137791	0.0500934	0.880311	1.53657	4.31009e-05
ENSG00000151651	ADAM8	-1.04003	0.14988	1.34893	0.000298492	2.55974	1.42747e-06	2.89609	2.32946e-07	0.792357	0.249365	3.47479	3.43412e-08	3.79952	7.36917e-09	1.7644	0.00702153	1.91773	4.49002e-05	2.0291	2.35251e-05	0.972453	0.0622603	-0.11338	0.799379	-0.64043	0.0260736	-0.184907	0.590836	0.858817	0.0105322	0.340547	0.204287	-0.535969	0.062881
ENSG00000168615	ADAM9	0.0592963	0.909303	-0.604472	0.88936	-0.492855	0.0218404	-0.727353	0.000577216	-0.0729974	0.86902	-0.471924	0.0290788	-0.706794	0.000804833	0.013664	0.973356	-0.582396	0.00673895	-0.495523	0.0227441	0.0532525	0.882298	-1.29898	0.506094	0.156731	0.91467	-0.285991	0.869645	-0.116918	0.988054	-0.847319	0.509317	-0.300266	0.836465
ENSG00000134028	ADAMDEC1	NA	NA	NA	NA	NA	NA	NA	NA	NA	NA	NA	NA	NA	NA	NA	NA	NA	NA	NA	NA	NA	NA	NA	NA	NA	NA	3.36867	0.000261287	NA	NA	NA	NA	NA	NA
ENSG00000154734	ADAMTS1	0.70453	0.0216227	-0.520212	0.37155	0.773959	0.00220162	-0.084292	0.742239	-0.0292043	0.953779	0.584545	0.0176266	-0.0724932	0.776767	0.27371	0.400093	-0.439922	0.0721747	-0.763879	0.00280305	-1.01704	0.0010818	0.344216	0.544809	-0.989449	0.0124896	1.22306	0.00439955	0.407298	0.497904	-1.17176	0.00299973	1.14392	0.00330941
ENSG00000142303	ADAMTS10	-1.85618	0.0229771	-0.351708	0.702485	-2.26605	0.000909384	-3.13293	3.32909e-05	1.05258	0.252064	-0.0585666	0.931101	-2.16195	0.00170983	2.50222	0.00367597	0.537773	0.415362	-0.63143	0.348491	2.80018	0.00119946	-0.112782	0.870747	-0.856589	0.0441319	2.0865	8.75718e-05	0.197358	0.86749	-0.680384	0.0888606	2.05254	2.92552e-05
ENSG00000151388	ADAMTS12	0.13847	0.865964	0.799593	0.250694	-1.06095	0.00492712	-1.3118	0.000802426	-0.66531	0.210888	-0.592882	0.105167	-1.05664	0.00509882	-0.277149	0.592223	-0.364162	0.328268	-0.220518	0.568385	-0.0163735	0.977726	-0.974527	0.140598	-0.792886	0.111145	-1.27801	0.0203711	-0.089668	0.969104	-0.935776	0.0515506	-1.27899	0.0134844
ENSG00000160323	ADAMTS13	-1.26664	0.000798521	NA	NA	1.77018	5.50106e-07	1.73469	9.47179e-07	0.88686	0.038151	2.13054	4.28744e-08	2.20451	2.81091e-08	1.78342	5.42819e-05	1.95774	1.90385e-07	1.66774	2.41876e-06	1.66278	7.10008e-05	NA	NA	1.70135	0.00652882	1.41278	0.0305769	0.509258	0.659654	1.35656	0.0156856	2.03028	0.00113781
ENSG00000138316	ADAMTS14	0.145243	0.905969	0.575111	0.749693	-0.948786	0.0699854	-1.19909	0.0246663	-0.809296	0.308441	-1.21771	0.0226648	-1.78016	0.00156115	-0.298562	0.696966	-0.204176	0.714441	-0.62935	0.241216	-0.800194	0.236797	-0.712032	0.528056	-0.677431	0.377798	-3.01122	0.00159992	0.434618	0.817759	-0.257407	0.736575	-3.18085	0.00076511
ENSG00000166106	ADAMTS15	-1.04013	0.0282577	-0.813243	0.543706	-0.746605	0.0406975	-0.41456	0.253708	-0.215674	0.747799	0.479523	0.18961	0.683758	0.0591661	-1.33497	0.00624931	0.847832	0.0219561	0.991165	0.00856096	-0.196266	0.714139	-1.36962	0.196609	2.35994	0.00311189	2.38149	0.00490691	-0.694392	0.600087	1.40834	0.036659	0.726391	0.305733
ENSG00000145536	ADAMTS16	1.74387	0.00114043	NA	NA	2.35728	3.27488e-06	1.72889	0.000190047	-0.547154	0.4188	0.927617	0.0250526	0.330221	0.428202	-0.344734	0.549611	2.13186	1.46603e-05	1.17215	0.00663033	-1.52519	0.00584232	NA	NA	NA	NA	NA	NA	NA	NA	NA	NA	NA	NA
ENSG00000140470	ADAMTS17	NA	NA	NA	NA	NA	NA	NA	NA	NA	NA	8.87759	4.19754e-09	8.47619	1.14886e-08	NA	NA	3.24533	2.41092e-07	3.34782	1.57823e-07	NA	NA	NA	NA	4.07209	4.7914e-09	NA	NA	NA	NA	3.43243	7.50915e-09	NA	NA
ENSG00000140873	ADAMTS18	NA	NA	NA	NA	NA	NA	NA	NA	NA	NA	3.54682	1.53349e-05	NA	NA	NA	NA	5.21494	7.40888e-07	NA	NA	NA	NA	2.31179	0.145306	NA	NA	2.31152	0.0774094	NA	NA	NA	NA	NA	NA
ENSG00000087116	ADAMTS2	-0.632431	0.055014	0.11735	0.939743	-0.927474	0.000720969	-1.00404	0.0002912	0.449268	0.224941	-0.632731	0.0158163	-0.990795	0.000332527	0.822197	0.0114387	-1.4569	3.21509e-06	-1.62471	7.08572e-07	0.450023	0.149022	-0.535586	0.289928	-0.765708	0.0378005	0.0819328	0.867267	-0.136462	0.917143	-1.06362	0.00394589	-0.511706	0.157439
ENSG00000173157	ADAMTS20	NA	NA	NA	NA	NA	NA	NA	NA	NA	NA	NA	NA	7.72751	3.3289e-07	NA	NA	6.11502	6.94097e-07	NA	NA	NA	NA	NA	NA	NA	NA	NA	NA	NA	NA	NA	NA	NA	NA
ENSG00000156140	ADAMTS3	NA	NA	-0.717309	0.283683	6.0572	1.81919e-08	6.12727	1.40837e-08	NA	NA	5.19678	1.20214e-07	4.96038	2.66762e-07	NA	NA	3.19982	7.79807e-07	3.12402	1.16475e-06	-0.690579	0.299525	0.0999926	0.90037	0.50369	0.278478	-1.9077	0.000761787	-0.107021	0.952867	-0.279594	0.540604	-2.08419	0.000197025
ENSG00000158859	ADAMTS4	NA	NA	0.585694	0.351039	NA	NA	NA	NA	NA	NA	NA	NA	NA	NA	NA	NA	NA	NA	NA	NA	NA	NA	-0.277835	0.660895	-0.246049	0.57469	-1.54568	0.00171253	-0.16712	0.90162	-0.861136	0.0348841	-2.1693	5.29304e-05
ENSG00000154736	ADAMTS5	0.105623	0.957413	1.55644	7.99609e-05	-3.30312	0.000185721	-4.39333	9.05087e-06	0.721177	0.560679	-2.21062	0.00579294	-4.2074	1.41874e-05	1.60622	0.0987326	0.0598799	0.943118	-0.933594	0.236268	1.38587	0.148443	0.772539	0.0277975	-1.33816	7.68945e-05	4.78022	5.13677e-10	0.549584	0.14922	-0.944586	0.00268586	4.50757	1.05968e-10
ENSG00000049192	ADAMTS6	0.0670863	0.934423	0.530175	0.252099	-0.279991	0.405228	-0.743876	0.0255525	0.600338	0.214911	-0.442909	0.182315	-0.858257	0.0107068	0.902053	0.0321037	0.145452	0.677107	-0.794639	0.0187731	-0.638837	0.11609	-0.167375	0.730126	-2.17389	1.5042e-06	-0.336211	0.367713	-0.485957	0.291565	-1.65577	1.61779e-05	0.16566	0.628534
ENSG00000136378	ADAMTS7	-1.50901	2.35383e-05	0.103058	0.930951	-0.165778	0.534873	-0.257204	0.328181	0.504764	0.190324	0.497918	0.0585785	0.495759	0.0592005	0.835528	0.0147177	-0.364905	0.161623	-0.453856	0.0835883	0.352696	0.294787	-0.14486	0.759679	0.398802	0.191882	-0.51839	0.115467	0.200422	0.762003	-0.0738881	0.817169	-0.464223	0.12141
ENSG00000134917	ADAMTS8	-1.89793	0.00183481	NA	NA	-1.04566	0.0301423	-1.14484	0.018408	-0.32549	0.694217	-0.0212708	0.96741	-0.490928	0.316878	-1.33652	0.0324948	5.33889	1.53245e-08	4.81306	1.00279e-07	NA	NA	2.34649	0.00161859	2.39058	0.000274145	NA	NA	NA	NA	3.98115	6.7766e-07	NA	NA
ENSG00000163638	ADAMTS9	NA	NA	-1.10629	0.140572	NA	NA	8.29464	6.78609e-07	NA	NA	4.86874	4.05881e-06	5.39977	6.77066e-07	NA	NA	8.27093	1.27421e-06	8.48073	7.72742e-07	NA	NA	0.668514	0.397903	1.58354	0.006283	-1.11593	0.0688752	-0.259387	0.872268	-0.365907	0.492006	-2.7406	0.000120088
ENSG00000178031	ADAMTSL1	1.14974	0.00656979	-0.381082	0.845686	0.198263	0.564875	-0.0735956	0.83652	0.165611	0.79006	-1.30751	0.000303424	-1.62982	2.14839e-05	0.268909	0.565475	-0.335513	0.320642	-0.606602	0.0715501	-0.17781	0.714976	-0.84255	0.389247	-0.548754	0.425152	-1.22573	0.09866	-0.201269	0.937205	-1.54721	0.0220255	-0.849265	0.208142
ENSG00000156218	ADAMTSL3	-1.27418	0.00034311	NA	NA	-2.02614	6.80783e-08	-2.26648	1.03678e-08	1.01465	0.0153626	-1.68358	1.4381e-06	-2.04605	6.19208e-08	0.735976	0.0378011	0.253176	0.389948	-0.299013	0.311531	1.10957	0.00215284	NA	NA	NA	NA	NA	NA	NA	NA	NA	NA	NA	NA
ENSG00000143382	ADAMTSL4	0.608409	0.241568	-1.37504	0.00912545	4.01647	3.26831e-11	3.34409	8.3846e-10	0.0495563	0.947681	4.41831	7.73757e-12	3.27636	1.02864e-09	1.06367	0.0170933	2.47553	1.05284e-07	2.20054	6.66625e-07	1.28579	0.00345219	0.943828	0.066893	1.16395	0.00592471	0.926717	0.0380535	0.623699	0.256894	0.203775	0.603437	0.780965	0.0475949
ENSG00000185761	ADAMTSL5	0.167345	0.733352	-0.304621	0.638665	-0.362429	0.130527	-0.680478	0.00334607	0.228101	0.570231	-0.352938	0.143635	-0.400547	0.0908274	0.539289	0.0664657	-0.357	0.138832	-0.559074	0.0177549	0.390898	0.18738	0.764937	0.0539025	0.872998	0.00753086	0.554733	0.109775	0.723067	0.0565852	1.35014	5.57777e-05	1.29754	0.000199896
ENSG00000105963	ADAP1	-0.322469	0.496254	-1.24438	0.0322938	-2.06958	3.41779e-11	-2.4576	1.49972e-12	-0.263456	0.575002	-1.50247	8.45175e-08	-1.87278	2.14898e-10	-0.0138904	0.978516	-0.768418	0.00653748	-1.37607	1.22438e-06	0.116376	0.79039	0.942729	0.102092	0.0280879	0.956586	0.375175	0.479564	0.556723	0.391887	0.0839858	0.85001	0.188171	0.688185
ENSG00000184060	ADAP2	NA	NA	-0.554403	0.216785	3.36464	1.59146e-08	2.86574	2.6675e-07	1.31201	0.0520521	3.62714	8.28573e-09	3.22086	6.68269e-08	1.42212	0.0229738	2.57999	7.1572e-07	1.98507	3.04096e-05	1.38462	0.00874612	1.26978	0.00223866	1.4911	9.40941e-05	0.0676867	0.876319	0.900922	0.0141303	1.06243	0.000974531	-0.247826	0.450919
ENSG00000160710	ADAR	-0.163324	0.808218	0.171256	0.902322	0.187224	0.554763	-0.261565	0.399459	-0.127443	0.829634	0.981235	0.00225438	0.913043	0.0037999	-0.0143342	0.979726	0.375172	0.224631	0.246601	0.439825	0.0456919	0.928212	-0.363756	0.556016	-0.106903	0.812267	-0.0943538	0.86342	0.0600081	0.978378	-0.517486	0.192222	-0.144771	0.747774
ENSG00000197381	ADARB1	0.0663815	0.897077	-0.775015	0.000198641	0.308018	0.152636	0.138006	0.541434	0.397823	0.196479	0.493021	0.0190398	0.0950256	0.677827	0.804001	0.00146407	0.0174843	0.942742	-0.0543124	0.824589	0.420606	0.103582	0.724036	0.000278719	1.49124	8.05411e-09	0.911616	1.51367e-05	0.364384	0.0517447	0.738148	1.78167e-05	0.910863	4.81605e-06
ENSG00000065457	ADAT1	0.274693	0.474873	-0.199431	0.713022	-0.529275	0.0178869	0.0262489	0.918274	-0.260355	0.479949	-0.682898	0.00205527	-0.293785	0.200564	-0.473318	0.0957694	-0.338667	0.14125	-0.0635933	0.805117	-0.256643	0.391402	-0.255539	0.477333	0.40532	0.093873	-0.601673	0.022636	-0.166144	0.750252	0.359702	0.11864	-0.258915	0.286319
ENSG00000189007	ADAT2	0.36224	0.468826	0.320144	0.548253	-0.504928	0.103401	-0.125514	0.708088	-0.0201294	0.975096	-1.12343	0.000210012	-0.682583	0.0247438	-0.647198	0.0789266	-0.579823	0.0608184	-0.274934	0.399817	-0.464156	0.22673	-0.597459	0.126148	-1.0418	0.0013806	-1.4319	0.00015581	-0.672945	0.0733345	-1.19304	0.000272983	-1.19167	0.000471186
ENSG00000213638	ADAT3	0.388865	0.530765	NA	NA	-0.193847	0.641311	-0.909278	0.0171363	-0.774064	0.141806	-0.796628	0.0378014	-0.85969	0.0228328	-0.831266	0.063467	-0.410588	0.316312	-0.725975	0.0656229	-0.781564	0.0863683	NA	NA	0.00179834	0.997549	NA	NA	NA	NA	NA	NA	NA	NA
ENSG00000142920	ADC	-0.584823	0.180397	NA	NA	2.38884	2.18373e-09	2.56789	7.0386e-10	0.468507	0.311146	2.86367	1.27539e-10	3.09505	3.35621e-11	0.577924	0.142057	2.20052	1.43209e-08	2.27948	9.01409e-09	0.921225	0.0105629	NA	NA	NA	NA	NA	NA	NA	NA	NA	NA	NA	NA
ENSG00000063761	ADCK1	-0.174256	0.780479	-0.267175	0.385035	-0.225122	0.467373	-0.714434	0.013292	-0.068256	0.908529	-0.0412263	0.900542	-0.399163	0.181858	0.168422	0.694647	-0.070423	0.830765	-0.465119	0.120655	0.140845	0.749262	0.369872	0.160713	-1.42644	5.8585e-07	-0.0110246	0.96934	0.212561	0.500674	-1.31005	7.68227e-07	-0.113096	0.582895
ENSG00000133597	ADCK2	0.140043	0.784657	-0.0166269	0.993471	0.35936	0.127233	-0.127342	0.612992	0.0457861	0.92708	0.352686	0.136954	-0.0612851	0.812325	-0.115448	0.751238	-0.413628	0.0776194	-0.771283	0.000753676	-0.070922	0.849293	0.201326	0.599396	-0.176715	0.503173	0.419412	0.131569	0.295993	0.443409	-0.251408	0.299208	0.637636	0.0119351
ENSG00000163050	ADCK3	-0.843663	0.00419106	NA	NA	0.633709	0.00778534	1.14905	1.15935e-05	0.382826	0.289582	1.31504	1.57045e-06	1.6729	3.87358e-08	0.875464	0.00447048	1.14277	1.3244e-05	1.1275	1.76005e-05	0.945735	0.00168848	NA	NA	NA	NA	NA	NA	NA	NA	NA	NA	NA	NA
ENSG00000123815	ADCK4	-0.0932884	0.865372	NA	NA	0.210714	0.391786	0.178295	0.471751	0.0771078	0.870707	0.147054	0.561647	0.110253	0.662416	0.0926076	0.806941	0.917818	0.000156178	0.808319	0.000664269	0.481036	0.0935083	NA	NA	NA	NA	NA	NA	NA	NA	NA	NA	NA	NA
ENSG00000173137	ADCK5	0.118205	0.90263	0.519656	0.279197	1.62378	0.000189244	2.03848	1.20569e-05	0.00757728	0.993667	1.65031	0.000164747	2.06425	9.68801e-06	-0.161787	0.798394	1.5721	0.000295906	1.62747	0.000220379	0.313378	0.574196	-0.16079	0.748677	0.12545	0.723728	-0.40239	0.284524	-0.237295	0.743615	1.01792	0.00159616	0.115851	0.746786
ENSG00000164742	ADCY1	NA	NA	0.534954	0.692745	4.65927	3.22187e-14	4.45966	7.59896e-14	0.113033	0.885326	4.95461	4.35148e-14	4.21126	8.43111e-13	NA	NA	3.42772	1.25128e-11	2.31469	1.41644e-08	-0.346282	0.531934	1.31389	0.0885646	3.08078	3.35538e-05	0.0513535	0.952993	NA	NA	2.35937	0.000201503	NA	NA
ENSG00000143199	ADCY10	NA	NA	NA	NA	1.35501	0.0164447	1.20286	0.0307925	NA	NA	NA	NA	1.83115	0.0026642	NA	NA	1.04976	0.0368135	0.863254	0.0838739	0.91671	0.130675	NA	NA	NA	NA	NA	NA	NA	NA	NA	NA	NA	NA
ENSG00000161912	ADCY10P1	-0.466133	0.360197	-0.120019	0.963635	-0.132934	0.720337	-0.0800586	0.83083	0.445477	0.370211	-0.586748	0.0951573	-0.4754	0.17348	0.406333	0.348284	0.440664	0.229227	-0.0486951	0.906492	0.610843	0.153654	0.177306	0.82753	-0.0671183	0.906853	0.647479	0.245808	0.110073	0.960144	NA	NA	0.395265	0.440624
ENSG00000078295	ADCY2	2.1997	6.33429e-06	NA	NA	1.33365	0.000772915	0.153013	0.737094	-0.287017	0.697923	-0.237501	0.557281	-0.592049	0.11961	-0.427835	0.362759	2.15195	4.26183e-06	1.312	0.002498	NA	NA	NA	NA	NA	NA	NA	NA	NA	NA	NA	NA	NA	NA
ENSG00000138031	ADCY3	0.475062	0.11999	-0.0114375	0.995675	-1.02873	3.3005e-06	-1.14	2.79398e-07	-0.592651	0.0604558	-1.13149	3.33362e-07	-1.1463	2.181e-07	-0.673421	0.014063	-1.394	6.48822e-10	-1.47831	7.62946e-11	-0.438543	0.115667	0.0273043	0.965503	-0.178463	0.610648	0.292321	0.446022	0.240376	0.725722	-0.62102	0.0549319	-0.146744	0.682295
ENSG00000129467	ADCY4	NA	NA	NA	NA	4.83123	2.13579e-06	NA	NA	NA	NA	NA	NA	NA	NA	NA	NA	5.49611	9.98988e-07	NA	NA	NA	NA	1.10559	0.066129	NA	NA	2.20821	0.000135786	1.1801	0.0359651	NA	NA	2.51592	1.09545e-05
ENSG00000173175	ADCY5	-4.61232	2.21835e-07	NA	NA	0.987533	0.044263	0.427732	0.389359	0.965032	0.173472	4.65894	1.61609e-08	4.26144	6.95119e-08	NA	NA	3.75162	3.55155e-07	2.91856	1.35855e-05	NA	NA	NA	NA	4.2051	9.57789e-07	NA	NA	NA	NA	4.25088	1.43532e-07	NA	NA
ENSG00000174233	ADCY6	-0.192708	0.624971	-0.365971	0.818041	-0.160554	0.472462	0.0406692	0.861966	0.220466	0.528656	-0.361527	0.0888435	-0.182349	0.405685	0.335532	0.221598	-0.538695	0.0100833	-0.457781	0.0306529	0.24991	0.367818	-0.458979	0.593028	0.255782	0.674041	0.209404	0.774714	-0.114936	0.962605	-0.542623	0.326661	-0.151657	0.811101
ENSG00000121281	ADCY7	-0.481888	0.280241	-0.404461	0.841844	-0.570091	0.0598618	-1.66071	5.14968e-06	0.26136	0.600859	-0.577248	0.0603446	-1.64503	6.6118e-06	-0.0403893	0.937547	-1.35745	6.2188e-05	-2.24962	5.50043e-08	0.613356	0.091876	-0.801104	0.436425	-1.60404	0.0272461	-0.857328	0.276107	0.0326083	0.993904	-1.96814	0.00703286	-0.782283	0.266241
ENSG00000155897	ADCY8	NA	NA	NA	NA	NA	NA	NA	NA	NA	NA	NA	NA	NA	NA	NA	NA	6.05948	1.59268e-05	5.70946	3.53063e-05	NA	NA	2.01631	0.000401358	4.10888	1.46864e-08	NA	NA	2.23395	9.26983e-05	4.49418	1.14637e-09	NA	NA
ENSG00000162104	ADCY9	-0.257712	0.467328	0.21083	0.697751	0.103422	0.651434	-0.157467	0.480317	0.381259	0.215618	0.336756	0.115387	0.0432594	0.854925	0.704211	0.00502751	0.58179	0.00545493	0.512733	0.015121	0.628131	0.0103437	-0.174755	0.644203	0.598465	0.0189019	0.854059	0.00276527	-0.00560738	0.997406	0.277897	0.246152	0.629925	0.0121954
ENSG00000141433	ADCYAP1	NA	NA	NA	NA	NA	NA	NA	NA	NA	NA	NA	NA	NA	NA	NA	NA	10.0804	4.00579e-07	9.55217	8.82631e-07	NA	NA	NA	NA	NA	NA	NA	NA	NA	NA	NA	NA	NA	NA
ENSG00000078549	ADCYAP1R1	NA	NA	NA	NA	NA	NA	NA	NA	NA	NA	NA	NA	NA	NA	NA	NA	9.24048	7.34187e-06	8.36347	3.88713e-05	NA	NA	NA	NA	NA	NA	NA	NA	NA	NA	NA	NA	NA	NA
ENSG00000087274	ADD1	-0.100316	0.838882	-0.094437	0.866199	-0.669516	0.00133441	-0.793291	0.00013198	-0.00195079	0.996449	-0.482666	0.0230847	-0.630596	0.00245177	0.0618276	0.863108	-0.598518	0.00466597	-0.621064	0.00336923	0.0941596	0.775078	-0.186711	0.504556	-0.303567	0.105474	0.0671761	0.773665	-0.020809	0.982283	-0.453943	0.0143068	-0.0518938	0.799242
ENSG00000075340	ADD2	NA	NA	NA	NA	5.65865	1.53802e-10	5.38408	4.40906e-10	NA	NA	7.18054	1.95932e-11	6.85598	4.89786e-11	NA	NA	2.16537	1.08159e-05	1.71091	0.000195903	-0.0534966	0.936848	NA	NA	6.71886	2.45269e-06	NA	NA	2.04639	0.0225439	3.3734	5.49486e-05	NA	NA
ENSG00000148700	ADD3	-0.195395	0.617557	0.131517	0.987213	-0.195666	0.374122	-0.277827	0.194122	0.368707	0.23298	-0.275363	0.202504	-0.422519	0.0427448	0.293944	0.293247	-0.290121	0.180943	-0.123601	0.594597	0.0655238	0.84593	-1.015	0.497604	-0.263706	0.80862	-0.0704817	0.96034	-0.352636	0.922598	-1.09729	0.259153	-0.742095	0.475681
ENSG00000203876	ADD3-AS1	NA	NA	-0.571656	0.505708	NA	NA	NA	NA	NA	NA	NA	NA	NA	NA	NA	NA	NA	NA	NA	NA	NA	NA	NA	NA	NA	NA	NA	NA	-1.20019	0.0675658	-1.21027	0.0161683	-0.778283	0.118667
ENSG00000020181	ADGRA2	NA	NA	0.77199	0.0149022	NA	NA	NA	NA	NA	NA	NA	NA	NA	NA	NA	NA	NA	NA	NA	NA	NA	NA	-0.339367	0.344463	-0.339947	0.181512	-0.107392	0.742848	-0.12589	0.865525	-0.396122	0.100302	-0.333778	0.187426
ENSG00000152990	ADGRA3	NA	NA	0.685608	0.0413677	NA	NA	NA	NA	NA	NA	NA	NA	NA	NA	NA	NA	NA	NA	NA	NA	NA	NA	0.302615	0.452897	0.0759408	0.799893	-0.0890777	0.799117	0.289824	0.510324	-0.0152747	0.95955	0.172938	0.543223
ENSG00000181790	ADGRB1	NA	NA	NA	NA	NA	NA	NA	NA	NA	NA	NA	NA	NA	NA	NA	NA	NA	NA	NA	NA	NA	NA	3.55123	0.00290476	3.57633	0.000546372	NA	NA	2.20608	0.0177635	2.26764	0.00325184	NA	NA
ENSG00000121753	ADGRB2	NA	NA	0.68093	0.232001	NA	NA	NA	NA	NA	NA	NA	NA	NA	NA	NA	NA	NA	NA	NA	NA	NA	NA	1.33582	0.0098982	2.5735	3.65004e-06	-0.676407	0.128983	2.13577	4.24648e-05	3.12442	8.80968e-08	0.0361765	0.940553
ENSG00000135298	ADGRB3	NA	NA	NA	NA	NA	NA	NA	NA	NA	NA	NA	NA	NA	NA	NA	NA	NA	NA	NA	NA	NA	NA	NA	NA	0.235309	0.753076	NA	NA	NA	NA	NA	NA	NA	NA
ENSG00000127507	ADGRE2	NA	NA	-0.980339	0.0635794	NA	NA	NA	NA	NA	NA	NA	NA	NA	NA	NA	NA	NA	NA	NA	NA	NA	NA	0.381917	0.533751	-0.25312	0.556852	-0.474449	0.308083	0.185698	0.87942	-1.05665	0.0101938	-1.57767	0.00076571
ENSG00000123146	ADGRE5	NA	NA	-0.114927	0.956461	NA	NA	NA	NA	NA	NA	NA	NA	NA	NA	NA	NA	NA	NA	NA	NA	NA	NA	-0.555749	0.374643	-1.17837	0.0094917	-0.5957	0.211282	-0.271292	0.784212	-1.0219	0.0172523	-1.10592	0.013228
ENSG00000153294	ADGRF4	NA	NA	NA	NA	NA	NA	NA	NA	NA	NA	NA	NA	NA	NA	NA	NA	NA	NA	NA	NA	NA	NA	NA	NA	NA	NA	2.36035	0.00278937	NA	NA	NA	NA	NA	NA
ENSG00000069122	ADGRF5	NA	NA	-0.638688	0.867497	NA	NA	NA	NA	NA	NA	NA	NA	NA	NA	NA	NA	NA	NA	NA	NA	NA	NA	0.231598	0.914036	-0.645337	0.622455	-1.04274	0.482186	0.956019	0.68128	NA	NA	NA	NA
ENSG00000205336	ADGRG1	NA	NA	-1.10125	0.0435438	NA	NA	NA	NA	NA	NA	NA	NA	NA	NA	NA	NA	NA	NA	NA	NA	NA	NA	2.78691	7.95971e-06	4.38826	4.66278e-09	0.997985	0.0308846	2.39709	6.72699e-06	3.49241	7.89816e-09	-0.176181	0.693165
ENSG00000173698	ADGRG2	NA	NA	NA	NA	NA	NA	NA	NA	NA	NA	NA	NA	NA	NA	NA	NA	NA	NA	NA	NA	NA	NA	NA	NA	3.14165	0.00258805	NA	NA	3.10652	0.00377711	NA	NA	NA	NA
ENSG00000112414	ADGRG6	NA	NA	-0.557667	0.905486	NA	NA	NA	NA	NA	NA	NA	NA	NA	NA	NA	NA	NA	NA	NA	NA	NA	NA	-0.451905	0.838524	1.00327	0.467946	0.359451	0.839359	0.514728	0.908587	-0.189524	0.892026	0.340415	0.817887
ENSG00000072071	ADGRL1	NA	NA	-1.78882	0.00589345	NA	NA	NA	NA	NA	NA	NA	NA	NA	NA	NA	NA	NA	NA	NA	NA	NA	NA	2.57903	0.000207939	5.24083	1.66818e-08	1.99469	0.000875281	1.83425	0.00136039	3.26058	5.35362e-07	0.400403	0.415107
ENSG00000117114	ADGRL2	NA	NA	-0.667285	0.790872	NA	NA	NA	NA	NA	NA	NA	NA	NA	NA	NA	NA	NA	NA	NA	NA	NA	NA	-0.886745	0.538661	0.517894	0.607394	-0.703257	0.541951	0.077761	0.989067	-1.37028	0.144384	-2.14641	0.0358577
ENSG00000150471	ADGRL3	NA	NA	NA	NA	NA	NA	NA	NA	NA	NA	NA	NA	NA	NA	NA	NA	NA	NA	NA	NA	NA	NA	NA	NA	2.62332	0.000651012	NA	NA	NA	NA	NA	NA	NA	NA
ENSG00000162618	ADGRL4	NA	NA	0.531411	0.600358	NA	NA	NA	NA	NA	NA	NA	NA	NA	NA	NA	NA	NA	NA	NA	NA	NA	NA	0.272913	0.742659	-1.07026	0.0506147	0.0238767	0.975159	0.722753	0.336837	-0.875513	0.0924836	0.298466	0.595406
ENSG00000164199	ADGRV1	NA	NA	NA	NA	NA	NA	NA	NA	NA	NA	NA	NA	NA	NA	NA	NA	NA	NA	NA	NA	NA	NA	NA	NA	4.42776	2.48763e-07	NA	NA	2.65055	9.94571e-06	1.88857	9.87289e-05	NA	NA
ENSG00000196616	ADH1B	-6.24885	0.000756953	NA	NA	2.34716	0.00540792	0.375026	0.658486	2.73795	0.0219653	NA	NA	NA	NA	NA	NA	NA	NA	NA	NA	NA	NA	NA	NA	NA	NA	6.00148	6.14313e-05	NA	NA	NA	NA	7.13447	8.17325e-07
ENSG00000197894	ADH5	0.257748	0.465676	0.0816462	0.850501	-0.386381	0.0669882	-0.40783	0.0515921	-0.0767757	0.85549	-0.609896	0.00313907	-0.594154	0.00380186	-0.272246	0.334909	-0.450817	0.0327083	-0.412896	0.0525767	-0.170964	0.558415	0.205628	0.30099	-0.552108	0.000584491	0.00894682	0.966536	0.129032	0.628733	-0.209479	0.116457	0.211419	0.132051
ENSG00000233859	ADH5P4	0.177132	0.800344	0.17132	0.587209	-0.176522	0.622342	-0.265173	0.444453	0.00784446	0.991646	-0.361242	0.295285	-0.385333	0.254671	-0.111155	0.827291	-0.276789	0.43476	-0.363699	0.297853	-0.343112	0.431113	0.0684306	0.797433	-0.542347	0.00265569	-0.0853847	0.683014	0.154052	0.604785	-0.344582	0.0336015	0.0530083	0.773151
ENSG00000147576	ADHFE1	0.263532	0.611325	0.172118	0.90187	0.272828	0.357654	0.617227	0.02756	0.75305	0.0506417	0.401188	0.1688	0.426835	0.136318	0.732452	0.0296661	0.652424	0.0217305	0.669778	0.0184516	0.481137	0.173743	0.0854061	0.901723	-0.045471	0.921131	0.0261483	0.964748	0.0816255	0.964532	0.495329	0.184298	1.04695	0.00969512
ENSG00000182551	ADI1	0.182517	0.651921	-0.371814	0.134255	-1.51129	3.07351e-11	-1.57735	1.16337e-11	-0.173385	0.640944	-1.60301	1.17222e-11	-1.5712	1.12275e-11	-0.202578	0.497253	-1.19087	1.313e-08	-1.23381	4.35414e-09	0.238798	0.395058	-0.0614837	0.832256	-1.50737	8.25739e-08	-0.373583	0.0644612	-0.340793	0.158383	-1.28792	1.94624e-07	-0.36035	0.0451328
ENSG00000159346	ADIPOR1	0.0872119	0.861168	-0.574342	0.0181781	0.655988	0.0015454	1.07376	1.98076e-07	-0.0435737	0.924239	0.608062	0.00350894	0.930405	5.80493e-06	-0.0165583	0.966338	0.200776	0.369463	0.575073	0.00637453	0.103247	0.748409	0.327616	0.191015	0.721837	0.000617209	0.268021	0.210548	-0.0440487	0.95581	0.657335	0.000483815	0.227488	0.217719
ENSG00000006831	ADIPOR2	0.117453	0.803316	0.0975766	0.814914	0.610548	0.00316575	0.865635	2.35123e-05	-0.0435289	0.923815	0.555229	0.0076006	0.783035	0.000125859	-0.261849	0.360803	0.276306	0.205103	0.398221	0.0628599	-0.323262	0.226277	-0.0755043	0.754211	0.867718	9.33756e-06	-0.16768	0.332177	0.0333466	0.958192	0.673852	8.90788e-05	-0.0983013	0.542579
ENSG00000148671	ADIRF	NA	NA	-2.07823	0.0108602	NA	NA	NA	NA	NA	NA	NA	NA	NA	NA	NA	NA	NA	NA	NA	NA	NA	NA	1.16915	0.162267	-0.0171896	0.982197	0.383705	0.619067	1.00795	0.187681	0.634085	0.243955	1.34023	0.0203964
ENSG00000156110	ADK	0.539894	0.0448593	0.0924128	0.889909	0.156799	0.491498	0.286396	0.18865	-0.304466	0.363351	-0.235212	0.289972	-0.0735121	0.754486	-0.390609	0.155119	-0.125966	0.589253	-0.06582	0.78692	-0.593429	0.0189614	0.319548	0.23167	-0.125307	0.545148	-0.713236	0.00227436	0.240996	0.432885	0.0878674	0.645281	-0.613868	0.00334983
ENSG00000148926	ADM	1.36516	0.00101382	-0.666583	0.0399713	1.22733	0.000396181	0.381784	0.238113	-0.544571	0.263278	0.648638	0.0445444	0.487473	0.126979	-0.635098	0.126589	0.484204	0.1324	0.481166	0.138443	-1.45418	0.000787745	0.89767	0.00392559	0.351858	0.15822	0.913924	0.00192075	0.383915	0.263973	0.191318	0.409561	1.23546	3.25021e-05
ENSG00000128165	ADM2	-0.206058	0.895416	0.24484	0.904935	-2.35593	0.00213279	-3.28684	0.000112025	-0.775783	0.469677	-2.46017	0.0018257	-2.47267	0.00152552	-0.830482	0.358646	NA	NA	NA	NA	NA	NA	-1.46372	0.069529	-2.55994	0.000551209	-4.84953	1.33949e-05	NA	NA	NA	NA	NA	NA
ENSG00000224420	ADM5	0.091491	0.924413	NA	NA	-1.56661	0.000909653	-1.78937	0.000199594	-0.896315	0.14099	-1.4567	0.00168294	-2.29233	1.28426e-05	-0.66518	0.206074	-0.59354	0.182162	-0.694345	0.109504	-0.193433	0.756036	NA	NA	NA	NA	NA	NA	NA	NA	NA	NA	NA	NA
ENSG00000101126	ADNP	-0.0827611	0.872819	0.181188	0.750362	-0.749521	0.00217904	-1.55266	2.30673e-07	0.208413	0.585294	-1.11755	2.78044e-05	-1.70931	4.66111e-08	0.159683	0.626505	-0.283111	0.235556	-0.981071	0.000170988	0.0634094	0.859256	-0.459655	0.161236	-1.263	2.62376e-05	0.135427	0.6443	-0.193769	0.685519	-1.67771	6.75227e-07	0.00810604	0.977703
ENSG00000101544	ADNP2	0.169147	0.693452	0.516044	0.415617	0.838223	6.30974e-05	0.805679	0.00012213	-0.176416	0.645058	0.314549	0.152985	0.337836	0.119387	-0.394681	0.154432	0.629111	0.00314299	0.212316	0.354458	-0.6245	0.0139753	-0.705103	0.198073	1.04965	0.0116412	-0.101195	0.848395	-0.160173	0.902832	0.201653	0.615497	-0.394823	0.333228
ENSG00000259456	ADNP-AS1	NA	NA	NA	NA	NA	NA	NA	NA	NA	NA	NA	NA	NA	NA	NA	NA	NA	NA	NA	NA	NA	NA	NA	NA	NA	NA	1.22432	0.0276739	NA	NA	NA	NA	NA	NA
ENSG00000181915	ADO	0.253757	0.535934	-0.191328	0.716026	-0.414905	0.075879	0.00479488	0.986036	0.137812	0.754179	-0.530925	0.0218859	-0.350115	0.13536	-0.133927	0.70403	-0.315037	0.185802	-0.208243	0.400505	-0.258364	0.40275	-0.277507	0.428574	0.20542	0.398364	0.0777915	0.796053	-0.154176	0.765209	-0.125984	0.602325	-0.278792	0.233812
ENSG00000163485	ADORA1	NA	NA	NA	NA	NA	NA	NA	NA	NA	NA	NA	NA	NA	NA	NA	NA	3.20846	3.62944e-06	3.00499	7.73752e-06	NA	NA	NA	NA	1.79593	0.0348008	NA	NA	NA	NA	NA	NA	NA	NA
ENSG00000128271	ADORA2A	0.0563723	0.955489	NA	NA	1.01096	0.00947909	0.448513	0.245557	-1.38491	0.0211891	1.77444	4.11619e-05	1.48105	0.000347449	-0.189257	0.743723	1.58274	0.000196941	1.10242	0.00587143	0.762927	0.113614	NA	NA	3.26683	7.11156e-07	NA	NA	NA	NA	2.63961	2.64386e-06	NA	NA
ENSG00000178803	ADORA2A-AS1	NA	NA	NA	NA	1.5202	0.00607648	NA	NA	NA	NA	2.28873	0.000105949	1.53008	0.00565953	NA	NA	2.17417	0.000390826	2.01146	0.000880172	NA	NA	NA	NA	NA	NA	NA	NA	NA	NA	NA	NA	NA	NA
ENSG00000170425	ADORA2B	1.00283	0.117399	0.167559	0.884518	0.739783	0.1186	-0.494317	0.299333	-0.284282	0.739109	0.140125	0.779489	-1.13531	0.0177389	-0.480727	0.450161	0.599935	0.209656	-0.152171	0.768498	-0.46242	0.458965	-0.0362016	0.956397	-0.37069	0.297969	-0.699386	0.0741134	-1.03538	0.017944	-0.740319	0.0282363	-1.47734	0.000369503
ENSG00000236136	ADORA2BP1	NA	NA	0.599114	0.286275	NA	NA	NA	NA	NA	NA	NA	NA	NA	NA	NA	NA	NA	NA	NA	NA	NA	NA	0.317055	0.578087	0.177403	0.664485	0.901268	0.0262478	NA	NA	NA	NA	0.91577	0.017739
ENSG00000159322	ADPGK	0.310701	0.361568	-0.0710175	0.866312	-0.68525	0.00114338	-0.0308501	0.899092	0.00357128	0.994774	-0.823096	8.78529e-05	-0.405733	0.0584665	-0.211087	0.489467	-1.22909	8.68152e-09	-0.901362	2.09547e-05	-0.419454	0.114797	-0.293849	0.109014	-0.419051	0.00529712	-0.290548	0.054149	-0.357958	0.031431	-0.634742	8.2577e-05	-0.513471	0.000819299
ENSG00000144843	ADPRH	NA	NA	NA	NA	2.24148	0.000143752	NA	NA	NA	NA	1.35135	0.007961	0.466296	0.361169	NA	NA	NA	NA	NA	NA	NA	NA	0.178293	0.91044	NA	NA	NA	NA	0.510567	0.817759	NA	NA	NA	NA
ENSG00000153531	ADPRHL1	-0.414898	0.439933	-0.25815	0.816478	-0.263057	0.464204	-0.326942	0.349976	0.556301	0.235219	0.502603	0.148401	0.40969	0.237058	0.782497	0.0460411	0.362285	0.300782	0.398659	0.253674	0.78924	0.040702	0.576841	0.284807	0.706213	0.0709405	1.01146	0.0191724	0.370134	0.606761	0.580089	0.105744	0.835987	0.0293771
ENSG00000116863	ADPRHL2	0.270962	0.492582	0.0794316	0.967536	-0.495079	0.0304403	-0.464324	0.0422215	-0.307598	0.395885	-0.424749	0.0664927	-0.45819	0.0445793	-0.489211	0.0904233	-0.693966	0.00212058	-0.689648	0.0023429	-0.75015	0.00470493	0.0981088	0.869221	-1.28471	0.00126459	-0.423618	0.309434	-0.174006	0.872216	-0.630764	0.0625469	-0.0763499	0.852256
ENSG00000170222	ADPRM	-0.156783	0.795156	-0.0515461	0.976029	0.454553	0.0988749	0.460559	0.0933764	0.373637	0.374913	0.332342	0.242415	0.109747	0.714456	0.510843	0.136241	0.811316	0.00256582	0.259047	0.372079	0.466588	0.169593	-0.131516	0.759769	-0.472633	0.0949187	0.825156	0.00993633	-0.53987	0.150085	-0.390939	0.134602	0.671208	0.0168995
ENSG00000120907	ADRA1A	NA	NA	NA	NA	NA	NA	NA	NA	NA	NA	NA	NA	NA	NA	NA	NA	8.00677	1.24895e-05	NA	NA	NA	NA	NA	NA	NA	NA	NA	NA	NA	NA	NA	NA	NA	NA
ENSG00000170214	ADRA1B	1.33702	0.00719239	-0.918854	0.127208	3.70313	7.1937e-10	2.74132	1.10156e-07	0.441384	0.498604	2.50973	2.31753e-07	1.93227	9.67443e-06	-0.258785	0.629738	4.799	4.58564e-11	4.40434	1.98992e-10	NA	NA	-0.121662	0.872009	1.76876	0.00049949	0.247803	0.652363	0.0248035	0.991978	1.31255	0.00249115	-0.0597732	0.905399
ENSG00000171873	ADRA1D	NA	NA	0.137712	0.943302	NA	NA	NA	NA	NA	NA	NA	NA	NA	NA	NA	NA	8.38136	7.32829e-05	NA	NA	NA	NA	0.516517	0.403945	-0.201798	0.661501	-2.26749	0.000105998	-0.151992	0.924787	0.52752	0.184694	-3.40923	1.38115e-06
ENSG00000150594	ADRA2A	1.60607	0.0103109	NA	NA	0.318852	0.543289	0.676742	0.174696	-0.408148	0.657815	-0.372796	0.439715	-0.402482	0.397009	0.166883	0.818581	0.619743	0.184407	0.230526	0.6419	0.326688	0.612723	NA	NA	NA	NA	NA	NA	NA	NA	NA	NA	NA	NA
ENSG00000222040	ADRA2B	NA	NA	NA	NA	NA	NA	NA	NA	NA	NA	8.79619	5.14922e-07	NA	NA	NA	NA	9.45254	2.10119e-07	NA	NA	NA	NA	NA	NA	NA	NA	NA	NA	NA	NA	NA	NA	NA	NA
ENSG00000184160	ADRA2C	NA	NA	-0.724194	0.420887	NA	NA	NA	NA	NA	NA	3.62648	3.8949e-08	2.5677	1.05016e-05	NA	NA	-0.719738	0.0356332	-1.93469	5.21355e-06	-0.665267	0.100425	0.396688	0.631521	-0.0552357	0.930191	-1.29178	0.0409993	0.0724784	0.979674	0.233428	0.659217	-0.848158	0.123295
ENSG00000043591	ADRB1	2.24631	1.16124e-05	2.44966	0.00809179	3.30258	1.61706e-09	2.99996	9.12109e-09	NA	NA	1.24434	0.000597418	1.13734	0.00132375	-0.780814	0.0766801	2.21399	5.27966e-07	1.8492	7.74494e-06	0.160268	0.776025	-1.38055	0.130427	2.81004	0.000214423	-2.23085	0.00674759	NA	NA	4.96028	2.95806e-07	NA	NA
ENSG00000169252	ADRB2	-0.314181	0.61497	1.07239	0.10252	0.320963	0.355444	0.216697	0.53518	-0.250652	0.678869	1.24767	0.000693515	0.931161	0.00720886	0.00312043	0.996904	0.707914	0.0409799	0.744923	0.0330243	-0.00628795	0.990208	-0.660451	0.355824	3.60841	4.58166e-07	0.11139	0.862797	NA	NA	4.36094	1.33287e-08	1.43144	0.00574076
ENSG00000173020	ADRBK1	0.0783899	0.88278	NA	NA	-1.54517	7.42703e-12	-1.75066	5.55031e-13	-0.277072	0.439826	-1.50893	1.24564e-11	-1.9329	8.90744e-14	-0.220712	0.48422	-1.31388	2.95817e-09	-1.57128	1.14314e-11	-0.193729	0.530574	NA	NA	NA	NA	NA	NA	NA	NA	NA	NA	NA	NA
ENSG00000100077	ADRBK2	NA	NA	NA	NA	4.7857	1.39445e-08	4.10717	2.18348e-07	NA	NA	6.11226	1.41767e-10	5.66739	4.96722e-10	NA	NA	1.57972	0.00117541	1.45273	0.00254497	0.22606	0.732855	NA	NA	NA	NA	NA	NA	NA	NA	NA	NA	NA	NA
ENSG00000130706	ADRM1	0.323057	0.450696	-0.155896	0.944651	-0.270757	0.291239	-0.168248	0.51938	-0.746676	0.0508746	-0.379938	0.137215	-0.132052	0.614473	-0.754085	0.0239985	-0.480019	0.059968	-0.442004	0.0856741	-0.958135	0.00380095	0.324671	0.660007	-0.695926	0.161399	-0.313686	0.604479	-0.159618	0.931931	0.203612	0.672736	-0.0854953	0.880412
ENSG00000239900	ADSL	0.216342	0.576035	0.214572	0.540979	-0.93798	6.10916e-06	-0.868784	2.7002e-05	-0.342053	0.288781	-1.03906	5.81058e-07	-1.0549	3.54221e-07	-0.357997	0.198046	-1.16455	4.13534e-08	-1.10443	1.90642e-07	-0.53161	0.0375504	0.00131731	0.997224	-1.05531	1.23274e-05	-0.0770716	0.759607	-0.0504719	0.94798	-0.609281	0.00135751	-0.127632	0.520079
ENSG00000035687	ADSS	-0.0365748	0.947952	0.394882	0.299552	-0.615414	0.00298494	-0.76461	0.00019843	0.0364455	0.935058	-0.567939	0.00638483	-0.780633	0.000137934	0.291395	0.302948	-0.520435	0.0134205	-0.521991	0.0134319	-0.00644509	0.985436	-0.130059	0.754791	-0.746922	0.00760956	0.343626	0.241155	0.0196402	0.989301	-1.11114	0.000207348	0.1843	0.499601
ENSG00000185100	ADSSL1	-0.805804	0.0234817	-0.894151	0.225213	-0.100034	0.756998	-0.188365	0.546856	0.229133	0.650633	-0.0356241	0.915252	-0.484943	0.105313	0.883003	0.013071	0.958829	0.00158441	0.478783	0.130287	-0.296436	0.492642	1.11149	0.0928628	1.63423	0.0028416	1.07943	0.0555141	0.98953	0.118782	1.29903	0.00701094	1.06832	0.0312442
ENSG00000111863	ADTRP	0.886349	0.221792	-0.101951	0.9756	1.40835	0.00675765	0.316813	0.547011	0.476647	0.572885	0.97956	0.0482633	0.235	0.644282	0.0762472	0.927298	1.01962	0.0426036	0.21222	0.693641	-0.581937	0.37879	0.512138	0.529986	0.142022	0.813569	0.262834	0.704372	0.968049	0.172247	0.733626	0.146822	1.12761	0.0342597
ENSG00000106624	AEBP1	-2.45739	2.20161e-10	0.941243	0.0242072	-0.606593	0.00563333	-0.825637	0.000312513	-0.189278	0.607441	-0.380001	0.0873842	-0.554376	0.0121957	-0.0395876	0.916756	-0.550599	0.0109789	-0.634316	0.00413928	0.00200677	0.995177	-0.140246	0.797601	-1.05469	0.00388872	0.354407	0.356126	0.408298	0.416952	-0.75204	0.0245051	0.618487	0.0598315
ENSG00000139154	AEBP2	0.0840282	0.877953	0.210193	0.796552	-0.168559	0.494257	-0.31547	0.180507	0.188282	0.64447	-0.34753	0.141564	-0.462048	0.0445872	0.208189	0.530917	-0.355691	0.130564	-0.478912	0.0391294	0.026406	0.946238	-0.420736	0.354451	-0.160947	0.6303	0.149393	0.703591	-0.33186	0.526138	-0.931482	0.00419543	-0.483918	0.122626
ENSG00000181026	AEN	0.977447	0.000163748	0.705413	0.054759	-1.97899	2.52808e-10	-1.9627	2.59152e-10	-0.579435	0.072264	-1.7615	1.82474e-09	-1.78424	1.24223e-09	-0.729722	0.00837007	-0.745413	0.000913414	-1.20326	1.43497e-06	-0.984431	0.00026153	-0.559552	0.163547	-1.73674	7.78801e-06	-0.590821	0.0657532	-0.361897	0.419315	-2.2804	2.51067e-07	-1.64517	2.02406e-05
ENSG00000104964	AES	-0.0488674	0.925383	-0.171193	0.885621	-1.52904	1.67837e-09	-2.03157	1.10025e-11	0.159569	0.672135	-1.13456	3.00408e-07	-1.61477	7.36763e-10	0.356425	0.189562	-1.21824	1.45066e-07	-1.44502	8.8804e-09	0.278752	0.30353	0.318496	0.546038	-1.55981	0.000195442	0.52395	0.192423	0.0741233	0.961883	-0.492222	0.139121	1.12535	0.00250941
ENSG00000263335	AF001548.5	-1.28353	0.00251608	NA	NA	-1.17325	0.00222617	-0.709682	0.0610092	-0.220522	0.737293	-0.158172	0.725405	0.219596	0.607904	0.489	0.321682	0.0563784	0.900584	0.301307	0.469211	0.879132	0.0424516	NA	NA	NA	NA	NA	NA	NA	NA	NA	NA	NA	NA
ENSG00000238039	AF011889.2	-0.671561	0.461826	NA	NA	0.940609	0.0781953	0.526156	0.328917	0.843808	0.276385	0.953307	0.0882311	0.421378	0.463731	1.15428	0.0942831	NA	NA	NA	NA	NA	NA	NA	NA	NA	NA	NA	NA	NA	NA	NA	NA	NA	NA
ENSG00000241769	AF011889.4	-0.345397	0.728062	NA	NA	1.43145	0.00362005	1.20979	0.0125335	1.38145	0.0482588	1.05262	0.0318307	1.05934	0.0296903	1.08088	0.0803117	1.86772	0.00100436	1.64227	0.00333918	0.531747	0.496582	NA	NA	NA	NA	NA	NA	NA	NA	NA	NA	NA	NA
ENSG00000241489	AF011889.5	-0.238113	0.518885	NA	NA	-0.0899414	0.697701	-0.256211	0.237832	0.331372	0.302706	0.0473877	0.842645	-0.132278	0.556553	0.516317	0.0486937	-0.126928	0.583159	-0.016125	0.947541	0.360124	0.177609	NA	NA	NA	NA	NA	NA	NA	NA	NA	NA	NA	NA
ENSG00000267307	AF038458.2	NA	NA	NA	NA	2.00212	1.37905e-05	2.33402	1.22939e-06	0.69743	0.278213	2.60786	6.78893e-07	2.86533	1.16922e-07	NA	NA	2.14756	8.56141e-06	2.36936	1.99297e-06	NA	NA	NA	NA	NA	NA	NA	NA	NA	NA	NA	NA	NA	NA
ENSG00000235609	AF127936.7	-0.935577	0.113258	NA	NA	-0.719286	0.101375	-1.61794	0.000695365	0.326752	0.654465	-0.210103	0.659863	-0.50603	0.264873	1.40172	0.01229	-0.342692	0.459382	-0.77929	0.088556	0.465204	0.417242	NA	NA	NA	NA	NA	NA	NA	NA	NA	NA	NA	NA
ENSG00000231125	AF129075.5	-0.302063	0.72532	NA	NA	0.613235	0.161713	0.790837	0.0582523	0.103872	0.902385	1.23021	0.00457022	1.2126	0.00468242	0.0489015	0.948087	0.516797	0.272742	0.45735	0.326338	NA	NA	NA	NA	NA	NA	NA	NA	NA	NA	NA	NA	NA	NA
ENSG00000255310	AF131215.2	-0.161931	0.803514	NA	NA	0.442881	0.13974	0.387475	0.197747	0.568658	0.17232	0.502357	0.0958654	0.338287	0.268693	0.266456	0.516856	0.609156	0.0419845	0.514563	0.0896444	0.391172	0.306085	NA	NA	NA	NA	NA	NA	NA	NA	NA	NA	NA	NA
ENSG00000254936	AF131215.3	NA	NA	NA	NA	0.880251	0.0573346	0.139263	0.783725	NA	NA	NA	NA	NA	NA	NA	NA	0.398924	0.434582	0.319461	0.527091	NA	NA	NA	NA	NA	NA	NA	NA	NA	NA	NA	NA	NA	NA
ENSG00000215346	AF131215.5	NA	NA	NA	NA	NA	NA	1.92225	0.000186964	1.40027	0.0488562	NA	NA	NA	NA	NA	NA	NA	NA	NA	NA	NA	NA	NA	NA	NA	NA	NA	NA	NA	NA	NA	NA	NA	NA
ENSG00000269918	AF131215.9	-0.241307	0.709245	NA	NA	0.576815	0.0854316	0.434743	0.19887	0.392362	0.439351	0.508764	0.138401	0.391536	0.254453	0.485062	0.24207	0.622444	0.0689173	0.64975	0.0571847	0.501323	0.231973	NA	NA	NA	NA	NA	NA	NA	NA	NA	NA	NA	NA
ENSG00000255085	AF186192.5	NA	NA	NA	NA	8.48541	3.37687e-09	7.96072	1.52301e-08	NA	NA	6.34648	1.85597e-08	NA	NA	NA	NA	NA	NA	NA	NA	NA	NA	NA	NA	NA	NA	NA	NA	NA	NA	NA	NA	NA	NA
ENSG00000224292	AF196972.9	NA	NA	NA	NA	2.68738	5.45063e-05	NA	NA	NA	NA	NA	NA	2.14694	0.000271064	NA	NA	4.33126	7.54505e-08	4.10363	1.72898e-07	NA	NA	NA	NA	NA	NA	NA	NA	NA	NA	NA	NA	NA	NA
ENSG00000242013	AF238380.3	-0.193366	0.782215	NA	NA	-0.433185	0.209943	-0.154081	0.671172	0.59633	0.194708	-0.295695	0.410248	0.299642	0.390186	0.428099	0.309503	-0.591243	0.0806656	-0.450324	0.191487	-0.174568	0.719357	NA	NA	NA	NA	NA	NA	NA	NA	NA	NA	NA	NA
ENSG00000234390	AF238380.5	0.267782	0.771467	NA	NA	-1.67036	0.00180077	-0.918227	0.0526716	0.149126	0.864112	-1.9262	0.000457057	-0.893861	0.0535611	-0.353077	0.568984	-0.470227	0.316544	-0.572557	0.218701	0.0455701	0.949448	NA	NA	NA	NA	NA	NA	NA	NA	NA	NA	NA	NA
ENSG00000196526	AFAP1	0.0886787	0.862193	-0.0375794	0.993408	-0.389937	0.0755723	-0.830367	0.0003966	0.12743	0.756822	-0.37072	0.0922816	-0.975608	5.90741e-05	0.397242	0.153451	-0.900519	0.000205815	-1.07999	2.34403e-05	0.389727	0.148629	-0.333087	0.627211	0.231074	0.626804	0.296204	0.583624	0.0620127	0.979404	-0.505154	0.246049	0.110822	0.824536
ENSG00000157510	AFAP1L1	0.99638	0.0802043	0.105969	0.928602	0.0173608	0.970635	-1.23617	0.0056534	-0.536483	0.422903	0.201035	0.654886	-1.43322	0.00159512	0.281673	0.646029	-1.1528	0.00938731	-1.82653	0.000169408	0.35125	0.540681	0.150043	0.742873	0.133408	0.677705	-1.05024	0.00281602	0.234782	0.702367	0.0617302	0.841376	-0.726172	0.0184319
ENSG00000169129	AFAP1L2	NA	NA	2.72014	5.0929e-05	6.04436	4.44221e-13	5.29463	4.0125e-12	NA	NA	6.19416	6.77566e-13	5.95442	1.28554e-12	NA	NA	3.74255	5.9682e-10	3.2717	5.76274e-09	-0.0540524	0.932086	0.337239	0.62748	1.12961	0.017141	-1.40722	0.00776791	0.672027	0.32177	2.84543	1.91929e-06	-1.92908	0.00108883
ENSG00000130396	AFDN	NA	NA	0.110476	0.884189	NA	NA	NA	NA	NA	NA	NA	NA	NA	NA	NA	NA	NA	NA	NA	NA	NA	NA	-0.192536	0.577218	0.908338	0.000434645	0.388024	0.130395	-0.0859182	0.919399	0.820108	0.000573712	0.763636	0.00195745
ENSG00000172493	AFF1	-0.163907	0.704573	-0.0609766	0.994743	1.46828	5.01724e-12	1.13761	5.38967e-08	0.0902951	0.833568	1.53753	7.04806e-13	1.3299	2.81641e-10	0.18328	0.556493	1.07694	3.89775e-07	1.04719	8.2942e-07	-0.121884	0.707369	-1.21443	0.511395	1.70942	0.171708	0.223346	0.893052	0.0811988	0.990044	0.529253	0.660689	0.13787	0.923473
ENSG00000155966	AFF2	NA	NA	NA	NA	2.81223	0.000510349	2.81986	0.000474612	NA	NA	6.31149	1.92605e-07	6.222	2.33799e-07	NA	NA	2.74095	0.000115546	2.31888	0.000671403	-0.287042	0.758614	NA	NA	4.04332	2.85496e-06	NA	NA	2.30821	0.00163528	4.01646	5.60404e-07	NA	NA
ENSG00000144218	AFF3	-0.0953295	0.919372	1.27776	0.0501742	-1.81638	6.17887e-05	-2.2301	5.18171e-06	0.0160341	0.985709	-1.58677	0.000305539	-2.19426	6.35391e-06	0.170911	0.778146	-0.961581	0.0187677	-1.70905	0.000156539	0.0542803	0.933958	-0.812532	0.267466	-0.365896	0.497507	-0.146791	0.82977	-0.553038	0.533017	0.0579891	0.916997	-0.556031	0.297955
ENSG00000072364	AFF4	-0.0103232	0.987004	0.0764597	0.990195	0.513246	0.0156948	0.373287	0.0831127	0.0568032	0.897841	0.258734	0.243571	0.0976967	0.673616	0.125974	0.698197	0.0351813	0.886228	-0.192116	0.40446	-0.0790515	0.814403	-0.773424	0.461848	0.0583131	0.942034	-0.0756158	0.939327	-0.11399	0.973125	-0.618352	0.371011	-0.312067	0.683733
ENSG00000135537	AFG1L	NA	NA	-0.109185	0.845809	NA	NA	NA	NA	NA	NA	NA	NA	NA	NA	NA	NA	NA	NA	NA	NA	NA	NA	0.462648	0.0615908	-1.01905	2.45749e-05	-0.185694	0.408222	0.481454	0.0375568	-1.18947	2.29183e-06	-0.195427	0.319218
ENSG00000223959	AFG3L1P	0.166552	0.746298	0.276832	0.821525	-1.24316	2.42314e-07	-1.20017	6.25603e-07	-0.192785	0.659228	-1.55922	1.90054e-10	-1.59368	7.85878e-11	-0.284958	0.399842	-1.28939	1.11772e-07	-1.61071	7.29741e-11	-0.221684	0.512217	-0.532579	0.391929	-1.75022	0.000475797	-0.308758	0.555205	-0.586996	0.370905	-1.2669	0.00431974	0.524149	0.215064
ENSG00000141385	AFG3L2	0.209365	0.58282	0.229527	0.199613	-0.10407	0.648393	0.376318	0.0733794	-0.157004	0.678776	-0.0183901	0.938434	0.195234	0.370856	-0.405732	0.127063	-0.429408	0.0423521	-0.147993	0.519396	-0.530035	0.0334975	-0.079818	0.691878	-0.100434	0.470361	0.000279531	0.998788	-0.0629807	0.868754	-0.169022	0.185622	-0.118548	0.3761
ENSG00000253606	AFG3L2P1	NA	NA	0.30654	0.742693	NA	NA	1.26495	0.026654	NA	NA	NA	NA	NA	NA	NA	NA	NA	NA	NA	NA	NA	NA	0.0285459	0.969911	0.232865	0.579698	0.0196216	0.973343	-0.0771648	0.966032	-0.11515	0.785375	-0.531123	0.191798
ENSG00000183077	AFMID	-0.188098	0.702931	-0.327269	0.140572	0.410114	0.0979915	0.146666	0.579947	0.276961	0.4898	0.900686	0.000184898	0.824309	0.000583135	0.492801	0.112689	1.08222	2.09831e-05	0.659873	0.00707353	0.682015	0.018826	-0.03069	0.916196	-0.619991	0.000969972	0.293213	0.110341	-0.21135	0.401782	-1.23396	1.75146e-07	0.00791535	0.967459
ENSG00000081051	AFP	0.343498	0.719054	NA	NA	0.699497	0.159885	-0.590785	0.24541	-1.15824	0.119294	-0.185151	0.72552	-0.71063	0.154256	-1.07541	0.0873769	NA	NA	0.461436	0.436202	NA	NA	NA	NA	NA	NA	NA	NA	NA	NA	NA	NA	NA	NA
ENSG00000119844	AFTPH	-0.302035	0.387739	-0.17025	0.659893	0.701238	0.000949199	0.782883	0.000213648	0.0645188	0.883938	1.01997	1.42217e-06	1.02467	1.22114e-06	0.237133	0.435198	1.24219	8.59467e-09	1.19296	3.21885e-08	0.231138	0.432223	-0.153515	0.57186	1.0535	6.45516e-06	0.88977	0.000122927	0.0954767	0.848686	0.879445	1.98354e-05	1.14939	2.58265e-06
ENSG00000038002	AGA	-0.347527	0.371909	-0.363258	0.181756	0.127612	0.630972	-0.228086	0.372962	-0.0687879	0.890693	0.223798	0.387381	-0.136816	0.604393	0.181638	0.615735	0.0438009	0.875474	-0.245294	0.346546	0.315225	0.324062	0.426022	0.0976266	-0.0759197	0.725894	-0.438461	0.0446873	0.214133	0.508986	-0.131737	0.495245	-0.198753	0.320819
ENSG00000157985	AGAP1	0.32008	0.373969	0.227657	0.763322	1.01762	3.54203e-06	0.798162	0.000283857	0.05533	0.906937	0.926647	2.39955e-05	0.867979	7.22153e-05	-0.0345151	0.931958	0.15891	0.509973	0.0670463	0.793047	-0.413084	0.138834	-0.475518	0.272551	0.921255	0.00478052	-0.183586	0.625457	-0.165625	0.843258	0.634233	0.0322869	-0.48142	0.121411
ENSG00000151303	AGAP11	-0.856848	0.00251018	NA	NA	-0.623392	0.00663839	-0.986154	8.12147e-05	0.649133	0.0480935	-0.409633	0.0709777	-0.827647	0.000600911	0.972811	0.00157641	-0.530662	0.0203757	-0.5915	0.0107678	0.747886	0.00799301	NA	NA	NA	NA	NA	NA	NA	NA	NA	NA	NA	NA
ENSG00000135439	AGAP2	-1.35328	0.00166022	NA	NA	3.9708	1.91488e-12	3.82025	5.16123e-12	0.79924	0.0787581	4.57673	4.53806e-13	4.35329	1.3263e-12	1.11838	0.0112591	3.52116	3.30631e-11	3.50855	3.76511e-11	1.68361	0.000109332	2.73312	0.000409727	5.14416	7.42886e-08	NA	NA	2.85025	0.000155243	5.5022	5.97289e-09	NA	NA
ENSG00000255737	AGAP2-AS1	NA	NA	0.563067	0.74974	NA	NA	NA	NA	NA	NA	NA	NA	NA	NA	NA	NA	NA	NA	NA	NA	NA	NA	0.00108613	0.999632	-1.96499	0.0124146	0.229605	0.812133	-0.494129	0.772799	-0.958301	0.175109	0.757078	0.299942
ENSG00000133612	AGAP3	0.0117995	0.985309	0.326475	0.568368	-0.664644	0.00132844	-0.508668	0.0148184	-0.0374205	0.933877	-0.126771	0.579915	-0.225678	0.300447	0.125125	0.695653	-0.385592	0.0718251	-0.347991	0.108191	-0.261123	0.348441	0.060502	0.907638	-0.115785	0.723676	0.657565	0.0510525	-0.0322031	0.984759	0.29938	0.283173	0.781714	0.0103103
ENSG00000188234	AGAP4	0.105398	0.90171	NA	NA	-0.282567	0.483448	0.542971	0.145939	0.426638	0.442186	-0.642785	0.0950559	0.226235	0.567727	0.102043	0.859871	NA	NA	NA	NA	NA	NA	NA	NA	NA	NA	NA	NA	NA	NA	NA	NA	NA	NA
ENSG00000172650	AGAP5	-0.0616354	0.943296	NA	NA	0.27629	0.455244	0.590588	0.0894112	0.242831	0.684954	-0.0632418	0.872391	0.411079	0.248557	0.166877	0.742209	0.944575	0.00725225	0.489463	0.183514	0.37844	0.412979	NA	NA	NA	NA	NA	NA	NA	NA	NA	NA	NA	NA
ENSG00000204149	AGAP6	0.0580603	0.935583	-0.112272	0.957939	-0.631727	0.0270728	-0.0466677	0.884241	0.062548	0.916291	-0.690949	0.0163777	-0.531074	0.065074	0.0534146	0.911475	-0.289592	0.339731	-0.25114	0.416846	-0.0249386	0.958549	0.0128435	0.988062	-0.311288	0.481036	0.025624	0.966864	-0.378722	0.651285	-0.127179	0.769643	0.554772	0.178325
ENSG00000204169	AGAP7	NA	NA	NA	NA	NA	NA	NA	NA	NA	NA	NA	NA	NA	NA	NA	NA	-0.0149106	0.978901	0.247877	0.638911	0.0271821	0.971411	NA	NA	NA	NA	NA	NA	NA	NA	NA	NA	NA	NA
ENSG00000174194	AGAP8	0.144339	0.877953	NA	NA	-0.43372	0.348296	0.321855	0.464121	0.154623	0.845805	-0.756857	0.0926966	-0.665203	0.129245	-0.314256	0.588102	-0.0113501	0.980877	0.286891	0.510908	-0.105732	0.865175	NA	NA	NA	NA	NA	NA	NA	NA	NA	NA	NA	NA
ENSG00000198035	AGAP9	NA	NA	NA	NA	NA	NA	NA	NA	NA	NA	NA	NA	0.449868	0.348157	NA	NA	NA	NA	NA	NA	NA	NA	NA	NA	NA	NA	NA	NA	NA	NA	NA	NA	NA	NA
ENSG00000165923	AGBL2	-0.947137	0.120041	NA	NA	1.70338	0.000225211	1.17893	0.00703815	0.886292	0.153003	2.16118	1.92462e-05	1.87232	0.000117914	1.40618	0.0135221	2.40598	9.97759e-06	1.62381	0.00108225	1.37929	0.0202418	NA	NA	NA	NA	1.4067	0.013443	NA	NA	1.8454	0.000631688	NA	NA
ENSG00000146856	AGBL3	0.164245	0.844729	-0.238688	0.773874	0.689251	0.0716519	0.269675	0.50314	0.239572	0.718062	0.211532	0.609378	0.0435103	0.921493	-0.374818	0.453455	0.486209	0.223326	0.13257	0.76073	0.0535207	0.931869	0.0273612	0.966012	0.588405	0.0795334	0.575356	0.10551	NA	NA	NA	NA	0.697011	0.0287092
ENSG00000084693	AGBL5	-0.185336	0.673703	-0.131867	0.690797	0.131337	0.587233	0.469741	0.0349828	0.173711	0.666795	0.221379	0.345571	0.49556	0.0254832	0.287332	0.345677	0.486067	0.0304074	0.728603	0.00100243	0.44268	0.10887	0.0473796	0.84301	0.92548	2.41003e-06	0.385324	0.0192032	0.0505552	0.926221	0.979967	2.66418e-07	0.562934	0.000478753
ENSG00000204305	AGER	-0.290321	0.650566	0.399511	0.756013	-1.36987	0.00010851	-1.5534	1.00723e-05	-0.0910828	0.89318	-1.19909	0.000833563	-1.15342	0.00109121	0.0726511	0.897422	-0.521003	0.172837	-0.0453005	0.915441	0.946367	0.0211064	-0.45556	0.563599	-0.830555	0.123857	-0.126496	0.856438	NA	NA	NA	NA	0.996811	0.0520849
ENSG00000173744	AGFG1	0.214065	0.571013	-0.262138	0.82819	0.99162	1.24462e-06	0.870583	2.00805e-05	-0.185785	0.60775	0.824954	5.49754e-05	0.756031	0.000206526	-0.144341	0.643462	0.541286	0.00965239	0.48264	0.0222091	-0.458976	0.070626	-0.054482	0.945669	0.967585	0.0271141	-0.0314841	0.959103	0.145439	0.924787	0.327399	0.430925	-0.303974	0.491554
ENSG00000106351	AGFG2	0.0721722	0.932918	-0.547355	0.31868	0.2862	0.410247	1.61551	3.13013e-05	-0.564448	0.278986	0.767736	0.0262616	1.67608	1.85439e-05	-0.754336	0.0900724	0.519557	0.128734	1.21097	0.000937126	-0.430674	0.334414	-0.0570215	0.932355	1.32875	0.00114625	-0.224703	0.613613	0.0284909	0.989301	0.708394	0.0425635	-0.784198	0.0344423
ENSG00000164252	AGGF1	-0.0894396	0.858728	-0.170091	0.640551	0.45333	0.0322978	0.530613	0.0112544	0.0813549	0.849976	0.46761	0.0275187	0.41054	0.0522326	0.155363	0.622278	-0.0342991	0.88807	0.0487581	0.843748	-0.00438549	0.989621	-0.125291	0.65234	0.158097	0.397893	-0.140982	0.509189	-0.0979833	0.83868	-0.0580887	0.761127	-0.388358	0.0336619
ENSG00000214273	AGGF1P1	NA	NA	NA	NA	NA	NA	NA	NA	NA	NA	NA	NA	NA	NA	NA	NA	1.21088	0.0471597	1.10065	0.0666195	NA	NA	NA	NA	NA	NA	NA	NA	NA	NA	NA	NA	NA	NA
ENSG00000233435	AGGF1P2	NA	NA	NA	NA	NA	NA	NA	NA	NA	NA	NA	NA	NA	NA	NA	NA	1.31941	0.0141183	NA	NA	NA	NA	NA	NA	NA	NA	NA	NA	NA	NA	NA	NA	NA	NA
ENSG00000006530	AGK	0.308396	0.426798	-0.025403	0.976189	-0.419597	0.0775325	-0.18644	0.454548	-0.203339	0.62073	-0.405196	0.0900173	-0.251454	0.301348	-0.342042	0.275689	-0.306715	0.206199	-0.444163	0.0624719	-0.361669	0.227313	-0.0234185	0.929833	-0.114104	0.45577	-0.749948	6.33551e-05	-0.0275623	0.965067	-0.13017	0.371918	-0.99907	1.41268e-06
ENSG00000162688	AGL	-0.36618	0.253261	-0.114786	0.968136	0.665852	0.0016297	0.594759	0.00502619	0.264973	0.448222	0.646517	0.00233022	0.677466	0.00130561	0.263431	0.37652	0.700409	0.00100268	0.815113	0.000128468	0.185044	0.539617	0.119672	0.900426	1.02109	0.0683053	-0.124516	0.866652	0.389124	0.738147	0.130994	0.81998	-0.194348	0.749047
ENSG00000116771	AGMAT	NA	NA	0.672043	0.06382	NA	NA	NA	NA	NA	NA	NA	NA	NA	NA	NA	NA	0.126913	0.860716	-1.97709	0.00895815	-0.558383	0.523945	0.474502	0.228503	-1.9008	2.97273e-06	-1.18111	0.00072514	1.07414	0.00179272	-1.24779	0.000232633	-1.25135	0.000354804
ENSG00000187546	AGMO	0.256168	0.852989	-0.398417	0.79495	-0.652499	0.299677	-1.83687	0.00533448	0.228826	0.847258	-0.947245	0.13136	-3.28871	2.32083e-05	0.164985	0.867602	0.736466	0.249866	0.0717639	0.919308	0.110578	0.913659	0.592087	0.494453	-2.57074	0.000875602	0.0113906	0.989782	1.87877	0.00383565	NA	NA	0.431237	0.45664
ENSG00000092847	AGO1	NA	NA	0.0918979	0.857251	NA	NA	NA	NA	NA	NA	NA	NA	NA	NA	NA	NA	NA	NA	NA	NA	NA	NA	0.0630977	0.82269	0.859394	3.55886e-05	0.225908	0.231768	0.251611	0.27793	0.613054	0.000685075	0.221597	0.188346
ENSG00000123908	AGO2	NA	NA	0.649183	0.108079	NA	NA	NA	NA	NA	NA	NA	NA	NA	NA	NA	NA	NA	NA	NA	NA	NA	NA	-0.63413	0.1288	-0.272631	0.394516	0.122872	0.759607	-0.528181	0.211814	-0.231986	0.455871	0.2595	0.418299
ENSG00000126070	AGO3	NA	NA	0.245574	0.574469	NA	NA	NA	NA	NA	NA	NA	NA	NA	NA	NA	NA	NA	NA	NA	NA	NA	NA	-0.051373	0.899363	0.338811	0.151991	-0.019634	0.954083	0.0660699	0.942193	0.155741	0.502866	-0.0844845	0.745202
ENSG00000134698	AGO4	NA	NA	0.221386	0.913745	NA	NA	NA	NA	NA	NA	NA	NA	NA	NA	NA	NA	NA	NA	NA	NA	NA	NA	-0.709514	0.399641	-1.30693	0.0287499	0.80089	0.208968	0.103587	0.96913	-1.32737	0.0231114	1.06155	0.0588272
ENSG00000204310	AGPAT1	0.0154968	0.980458	-0.390184	0.289424	0.530019	0.0109962	0.685116	0.000871293	-0.0732212	0.863857	0.473606	0.024238	0.670847	0.00108695	0.0336326	0.928764	0.299995	0.167862	0.558882	0.00793092	0.290159	0.284616	0.507401	0.109572	0.607705	0.0160269	-0.0292369	0.933558	0.254943	0.540019	0.811375	0.000798928	0.0123382	0.965866
ENSG00000169692	AGPAT2	0.292581	0.544915	-0.128706	0.963491	-0.996666	0.000584824	-1.53739	2.90021e-06	-0.433548	0.300767	-0.749491	0.00722612	-1.00315	0.000549371	-0.291603	0.442198	-0.564912	0.0380728	-0.917026	0.00145882	-0.233009	0.535222	0.176081	0.837162	-1.73035	0.00272792	-0.20535	0.765294	-0.0336482	0.990747	-0.647732	0.19076	0.831657	0.104981
ENSG00000160216	AGPAT3	0.200041	0.657308	0.0282671	0.995675	-0.923227	4.90715e-05	-1.19173	1.8465e-07	-0.131999	0.766828	-0.924129	5.03353e-05	-1.26005	3.57283e-08	-0.315357	0.313901	-1.3571	4.74002e-09	-1.57209	2.17528e-11	-0.361645	0.221374	-0.265817	0.829203	-0.363139	0.652056	-0.0965569	0.927626	0.189428	0.94957	-1.17481	0.112653	-0.379303	0.641418
ENSG00000026652	AGPAT4	-1.37476	0.00139334	0.460017	0.0582251	2.33208	4.86628e-08	2.08495	3.76627e-07	0.394796	0.445123	3.0575	9.56271e-10	3.08574	9.90309e-10	0.567277	0.203156	1.96108	8.88212e-07	1.6476	1.15312e-05	0.411674	0.322337	-0.0828831	0.773693	0.804532	0.000171258	-0.0876226	0.716503	-0.0186892	0.986985	1.22924	2.99691e-07	0.101007	0.611337
ENSG00000155189	AGPAT5	0.0534196	0.928478	0.193607	0.963491	0.995191	1.37489e-05	1.21143	1.44145e-07	-0.508851	0.128403	0.662131	0.00433161	0.842984	0.000225092	-0.539053	0.0664657	-0.20671	0.405076	-0.105049	0.688721	-0.898739	0.000826732	-0.889235	0.457632	0.670672	0.414595	-1.31471	0.144311	-0.352933	0.888859	-0.290272	0.722744	-1.41369	0.0875226
ENSG00000158669	AGPAT6	0.0304358	0.957788	NA	NA	0.791514	0.000109139	0.626959	0.00227955	-0.162561	0.665976	0.591676	0.00421206	0.511303	0.0133551	-0.220094	0.452192	-0.101913	0.660671	-0.27845	0.203697	-0.528299	0.0334975	NA	NA	NA	NA	NA	NA	NA	NA	NA	NA	NA	NA
ENSG00000138678	AGPAT9	-0.639496	0.336394	NA	NA	2.35433	2.45318e-06	1.59879	0.000345756	0.162698	0.842488	2.53861	1.17433e-06	2.40353	2.42841e-06	-0.470888	0.442216	1.87816	4.95528e-05	1.42548	0.0010365	0.339221	0.537643	NA	NA	NA	NA	NA	NA	NA	NA	NA	NA	NA	NA
ENSG00000188266	AGPHD1	-0.373647	0.478613	NA	NA	1.02103	0.00101343	1.51661	9.8511e-07	0.104173	0.867379	1.33737	2.02633e-05	1.76315	4.65173e-08	-0.0322736	0.953948	1.2095	0.000127413	1.35757	1.73045e-05	0.39287	0.341461	NA	NA	NA	NA	NA	NA	NA	NA	NA	NA	NA	NA
ENSG00000018510	AGPS	0.0867474	0.862621	0.0477822	0.993395	0.246249	0.264224	0.17614	0.431407	-0.127674	0.753585	-0.0432961	0.856975	-0.0724032	0.757402	-0.255544	0.384421	-0.0622296	0.795859	0.0960138	0.68819	-0.182033	0.540913	-0.794278	0.321277	0.313557	0.594573	-0.338692	0.618899	-0.320383	0.822247	-0.409706	0.459299	-0.906147	0.108513
ENSG00000188157	AGRN	-0.00365584	0.996527	-0.267701	0.602991	0.690269	0.0153381	0.212718	0.463562	-0.153527	0.773879	0.438159	0.121345	0.269424	0.346782	0.268001	0.497968	0.343647	0.226562	0.136242	0.652024	0.243602	0.530801	-0.075226	0.863118	0.72584	0.00866937	-1.00755	0.00138152	0.158488	0.808824	0.242249	0.339841	-0.376554	0.154645
ENSG00000135744	AGT	-3.27324	0.00789872	-1.39192	0.0726659	2.49381	0.00191851	1.80346	0.0184353	0.380104	0.790375	3.711	0.000329971	2.95622	0.00303999	NA	NA	0.174949	0.826845	-0.43	0.586663	-0.201036	0.864367	2.08152	0.00479557	2.92227	4.33868e-05	-0.176331	0.82649	1.50966	0.0223837	2.61361	2.66909e-05	0.0961948	0.883049
ENSG00000135049	AGTPBP1	-0.201207	0.616683	-0.500086	0.341669	1.49779	6.68752e-12	1.68124	1.09737e-12	0.151033	0.70236	1.59086	2.55767e-12	1.70177	1.06257e-12	0.375591	0.175492	1.42881	3.74562e-11	1.44938	2.85728e-11	0.116513	0.720286	0.513636	0.289141	2.69437	2.78841e-07	1.19073	0.00285092	0.552734	0.227138	1.69133	2.10365e-05	1.2866	0.000639832
ENSG00000144891	AGTR1	-0.905827	0.234452	1.08465	0.0404365	3.5189	4.73721e-08	3.12766	2.85326e-07	-0.21947	0.819089	3.56382	7.88637e-08	3.15318	4.7478e-07	NA	NA	3.32908	2.82329e-07	3.05288	1.12764e-06	NA	NA	0.133128	0.84863	0.176705	0.696634	-2.32073	6.01944e-05	0.135489	0.93276	0.528926	0.186968	-2.47139	2.95503e-05
ENSG00000177674	AGTRAP	-0.138008	0.803999	-0.405916	0.467505	-0.0182367	0.94897	-0.0246075	0.930923	-0.238719	0.571568	0.305417	0.233701	0.401574	0.108215	0.0680429	0.870463	0.376666	0.138172	0.311966	0.228285	0.184636	0.600634	0.603162	0.16087	-0.907407	0.00751361	1.12599	0.00309521	0.220115	0.76097	-0.426106	0.156233	1.31565	0.000274139
ENSG00000164089	AGXT2L1	NA	NA	NA	NA	8.92998	3.63254e-07	8.47966	1.063e-06	NA	NA	NA	NA	NA	NA	NA	NA	10.2507	3.81059e-08	9.06045	4.73079e-07	NA	NA	NA	NA	NA	NA	NA	NA	NA	NA	NA	NA	NA	NA
ENSG00000175309	AGXT2L2	-0.400416	0.300516	NA	NA	0.00161935	0.9952	-0.314041	0.217786	0.590037	0.107939	-0.220591	0.392444	-0.467357	0.0670161	0.958805	0.00450634	0.253583	0.322823	0.11843	0.661746	0.797537	0.0130242	NA	NA	NA	NA	NA	NA	NA	NA	NA	NA	NA	NA
ENSG00000153207	AHCTF1	0.265056	0.45417	-0.113103	0.866499	-0.437597	0.0379096	-0.379496	0.0729876	-0.290587	0.38203	-0.425827	0.0442201	-0.466868	0.0253048	-0.417117	0.119739	-0.516311	0.0141329	-0.541333	0.0101693	-0.543312	0.0304161	-0.344317	0.262469	-0.254969	0.256445	-0.0313168	0.91702	-0.318617	0.297418	-0.524023	0.0157144	-0.189326	0.394722
ENSG00000101444	AHCY	0.111297	0.814915	-0.136074	0.830758	-0.412389	0.0513688	-0.592662	0.00425496	-0.379932	0.219641	-0.337737	0.115916	-0.466326	0.0256578	-0.255121	0.377902	-0.137686	0.547739	-0.285927	0.19394	-0.197763	0.495746	0.0747282	0.832256	-0.549031	0.0156192	-0.277602	0.269245	-0.0659443	0.937205	-0.256695	0.2035	-0.12632	0.583598
ENSG00000168710	AHCYL1	-0.0591797	0.906969	0.075175	0.990363	1.03246	5.011e-07	0.994498	1.2401e-06	-0.013902	0.975855	1.07575	1.71351e-07	1.15994	1.75796e-08	-0.0675239	0.846643	1.13111	6.49304e-08	1.43028	1.73708e-11	-0.0557917	0.871204	-0.168899	0.890284	1.60628	0.0332632	-0.223481	0.814548	0.398869	0.832862	0.820793	0.231948	-0.560675	0.459803
ENSG00000158467	AHCYL2	-1.13075	2.64959e-05	0.0483735	0.994439	0.465155	0.0535269	0.740114	0.00165484	1.12767	0.00136236	1.58711	6.68509e-09	1.77453	1.03219e-09	0.917422	0.00161113	0.662203	0.0056583	0.904806	0.000139889	0.417202	0.167931	-0.349111	0.817358	1.62147	0.0857557	0.510796	0.653958	0.455248	0.863751	0.590966	0.512398	0.311921	0.758969
ENSG00000126705	AHDC1	0.0552277	0.918165	0.0393798	0.968703	-0.361076	0.103079	-0.604659	0.00519719	-0.183745	0.634489	-0.493078	0.0240356	-0.532463	0.0137354	-0.00252715	0.995643	0.380342	0.0885974	0.575661	0.00857059	0.0185553	0.959947	-0.672842	0.00487907	0.467274	0.0172895	-0.0113451	0.967609	-0.439142	0.0675151	0.501553	0.00628289	0.00787979	0.971919
ENSG00000135541	AHI1	-0.126836	0.813296	-0.130975	0.791819	0.409316	0.102843	0.309778	0.211782	0.202329	0.630503	0.0736044	0.783075	-0.0408841	0.880086	0.0778375	0.845199	-0.108249	0.685943	-0.169136	0.522908	-0.545209	0.0720037	0.143893	0.613738	0.501245	0.0100764	-0.140265	0.535268	0.109604	0.819172	0.117854	0.524547	0.256208	0.170085
ENSG00000124942	AHNAK	0.0248198	0.969659	-0.308311	0.834607	-1.51981	6.14353e-08	-2.03794	4.60133e-10	0.201447	0.60234	-1.01664	2.83703e-05	-1.58357	3.52933e-08	0.473834	0.0938517	-1.33812	7.11728e-07	-1.33188	8.40634e-07	0.0876745	0.802419	-1.03588	0.134239	-0.760306	0.144362	-0.234028	0.719554	-0.355457	0.752352	-0.81514	0.103203	0.33492	0.531131
ENSG00000185567	AHNAK2	-0.243152	0.668713	-0.466726	0.180603	-0.793293	0.00837956	-1.00531	0.00134791	0.1374	0.809251	-0.333745	0.263	-0.54899	0.0647158	0.427237	0.277228	0.262364	0.384357	0.268881	0.379027	0.343161	0.38084	0.0271636	0.955472	2.40072	2.20664e-08	-0.796799	0.00578624	0.354293	0.319573	2.40534	5.21752e-09	-0.186177	0.479549
ENSG00000106546	AHR	-0.13334	0.811664	-0.199431	0.934185	0.911849	0.000888041	0.149165	0.580697	0.443812	0.237869	0.672409	0.0110864	-0.100312	0.713247	0.726923	0.0262554	1.64688	6.46313e-07	1.44506	4.62536e-06	0.844289	0.00888647	0.479336	0.590381	2.19262	0.00105137	0.724265	0.275975	0.358715	0.798474	1.35943	0.0164192	0.881913	0.124671
ENSG00000063438	AHRR	-0.459979	0.166226	0.738036	0.094687	-1.2382	6.91375e-06	-1.67545	8.94583e-08	0.272859	0.470203	-1.12647	2.83605e-05	-1.27158	6.07958e-06	0.329125	0.290902	0.714264	0.0038878	0.38785	0.107169	0.404393	0.17779	-0.171078	0.747033	-0.193876	0.589507	0.852648	0.0241104	-0.0570543	0.972936	-0.391938	0.241141	0.634172	0.0612699
ENSG00000100591	AHSA1	0.224949	0.544993	-0.244228	0.82177	-0.656295	0.00141635	-0.0145897	0.951353	-0.41361	0.17232	-0.550682	0.00793638	-0.0712144	0.757708	-0.451003	0.0863101	-0.636556	0.00220374	-0.156494	0.493639	-0.328612	0.217345	0.277679	0.623452	-0.629347	0.0980113	-0.367773	0.404338	-0.0536534	0.979337	0.118162	0.751645	-0.283621	0.464836
ENSG00000173209	AHSA2	-0.378162	0.256429	0.361443	0.748737	-0.549785	0.016077	-1.03821	4.71638e-05	0.537079	0.0986682	-0.751939	0.00156187	-1.28919	2.46897e-06	0.788231	0.0074136	-0.641095	0.00630507	-0.842394	0.000600782	1.07067	0.000437865	-0.835753	0.190707	-1.43881	0.00442567	0.355929	0.523992	-0.422868	0.639461	-1.34084	0.00567381	1.3008	0.00651194
ENSG00000111732	AICDA	NA	NA	NA	NA	NA	NA	NA	NA	NA	NA	NA	NA	NA	NA	NA	NA	3.33527	0.0010002	2.47777	0.0094645	NA	NA	NA	NA	NA	NA	NA	NA	NA	NA	NA	NA	NA	NA
ENSG00000186063	AIDA	-0.160318	0.744572	-0.000664567	0.999513	-1.1956	1.97341e-07	-0.834103	0.000267794	-0.13875	0.755002	-0.915387	6.78606e-05	-0.890789	9.62157e-05	0.00931237	0.983443	-1.43291	1.04703e-09	-1.17902	3.98692e-07	-0.193311	0.554931	-0.0940041	0.809305	-0.401555	0.0988341	-0.0271792	0.934795	-0.0170997	0.989301	-0.835543	0.00118394	-0.107034	0.678261
ENSG00000126878	AIF1L	-1.93848	0.00231291	NA	NA	5.18283	6.57685e-12	4.80287	2.53113e-11	-0.0767972	0.933713	6.53403	7.31419e-13	6.06558	2.42341e-12	NA	NA	5.06641	2.7379e-11	4.49196	2.04524e-10	0.362143	0.570664	4.40676	0.000165083	6.68152	1.38591e-07	NA	NA	2.27071	0.00633042	4.50664	4.02905e-07	NA	NA
ENSG00000156709	AIFM1	-0.00756036	0.990741	0.021845	0.990704	-0.13505	0.567188	0.213243	0.349212	-0.513478	0.0976155	-0.0497791	0.840426	0.241358	0.284559	-0.490184	0.0745037	-0.0658449	0.789378	0.156915	0.510472	-0.43765	0.104281	0.0277459	0.94337	-0.199559	0.365552	-1.02264	0.000204682	-0.163796	0.724827	0.0772586	0.712787	-0.984248	0.000120737
ENSG00000042286	AIFM2	0.277719	0.483626	-0.563617	0.0474683	-1.03986	4.08271e-06	-1.56306	5.72589e-11	-0.521865	0.110501	-1.14227	4.62205e-07	-1.6554	1.74608e-11	-0.568621	0.0469872	-1.1746	2.61124e-07	-1.52502	1.69886e-10	-0.312154	0.295826	0.911472	0.000986974	-0.500562	0.0235659	-0.358537	0.142278	0.311445	0.313949	-0.439544	0.0291095	0.02903	0.906992
ENSG00000183773	AIFM3	NA	NA	NA	NA	4.11611	6.87438e-07	3.34828	1.39687e-05	NA	NA	6.25869	1.64481e-08	5.18395	5.00889e-07	NA	NA	4.119	3.11753e-05	NA	NA	NA	NA	NA	NA	2.97582	0.000504055	NA	NA	NA	NA	3.23834	2.53981e-05	NA	NA
ENSG00000146416	AIG1	-0.200119	0.643951	-0.0657572	0.969774	0.718082	0.00113061	0.499524	0.0255053	0.308022	0.385646	0.913632	3.26572e-05	0.745971	0.000686836	0.396619	0.17324	0.663115	0.00292713	0.671218	0.00267023	0.298564	0.307626	0.834039	0.0364668	0.532101	0.0947457	0.171709	0.669584	0.459122	0.310994	0.581781	0.0449601	0.367634	0.243251
ENSG00000112297	AIM1	-0.977367	0.017088	NA	NA	2.13816	1.23304e-07	1.66111	6.35946e-06	-0.422634	0.392142	2.69793	3.89597e-09	2.62105	6.37353e-09	-0.720888	0.0890982	3.66742	3.51836e-11	3.15418	4.6854e-10	-0.559899	0.177421	NA	NA	NA	NA	NA	NA	NA	NA	NA	NA	NA	NA
ENSG00000176092	AIM1L	0.382779	0.666177	NA	NA	3.0445	3.30615e-07	2.39616	1.10287e-05	-0.259398	0.770333	3.49385	4.031e-08	2.84375	8.84862e-07	0.430056	0.496999	4.88119	1.21614e-09	4.54862	4.1529e-09	NA	NA	NA	NA	NA	NA	NA	NA	NA	NA	NA	NA	NA	NA
ENSG00000164022	AIMP1	0.254135	0.489736	-0.0184788	0.993471	-0.65433	0.00176305	-0.848472	4.44689e-05	-0.168171	0.661967	-0.822601	7.82405e-05	-1.04746	4.62623e-07	-0.0714217	0.841288	-0.881726	2.78527e-05	-0.836661	7.23643e-05	-0.305013	0.270452	0.0698389	0.875844	-0.950251	0.00132576	-0.21119	0.520306	-0.0801575	0.938859	-0.617825	0.0157808	0.0358262	0.908122
ENSG00000106305	AIMP2	-0.164633	0.709245	-0.0674714	0.92115	0.0449133	0.852678	-0.23789	0.289975	-0.657025	0.0303151	0.138237	0.556298	-0.00482069	0.984681	-0.453349	0.0998689	-0.138293	0.557587	-0.413233	0.0613456	-0.701777	0.00563032	0.0216536	0.949322	-1.17443	2.12946e-06	-0.647374	0.00226852	-0.0647133	0.921796	-0.951559	1.00209e-05	-0.950109	2.54176e-05
ENSG00000110711	AIP	-0.114349	0.827001	-0.321906	0.750722	-1.51965	2.70481e-11	-1.69927	6.6991e-13	-0.0295047	0.953264	-1.14749	3.31685e-07	-1.34798	2.47716e-09	0.253607	0.42697	-0.496393	0.0301947	-0.743209	0.001014	0.456341	0.104137	0.813647	0.133885	-1.05826	0.0137052	0.810065	0.0777128	0.416522	0.560258	-0.201796	0.615553	0.99441	0.0156714
ENSG00000196581	AJAP1	-0.966741	0.169417	3.57241	4.43572e-05	-1.76868	0.00239688	-2.88465	3.20946e-05	0.226956	0.790578	NA	NA	NA	NA	NA	NA	-2.24307	1.33486e-06	-2.36615	6.62762e-07	-1.09674	0.013652	-1.00667	0.206711	-0.207633	0.742028	-1.60403	0.0147947	-0.368054	0.825513	1.416	0.0158308	-1.9497	0.00895447
ENSG00000129474	AJUBA	0.378256	0.382554	0.596347	0.1429	-1.70718	6.94489e-07	-2.14534	2.33373e-08	-0.296857	0.501854	-1.74452	5.2925e-07	-2.26361	9.35586e-09	-0.0509381	0.910651	-0.565642	0.04318	-0.91208	0.00189952	0.368039	0.295002	-0.518401	0.217001	-0.487312	0.114451	0.237989	0.51444	-0.285797	0.61389	-0.776338	0.0114852	0.371338	0.223009
ENSG00000106992	AK1	-0.0286727	0.964207	-0.225624	0.887506	0.374649	0.10265	0.188953	0.42926	-0.164793	0.69135	0.358397	0.121219	0.375819	0.0996995	-0.19624	0.552069	0.523108	0.0201058	0.41457	0.0703086	-0.0147501	0.969598	0.299365	0.67608	-0.142837	0.785234	-1.09516	0.0398651	0.367525	0.706203	0.961579	0.0291314	-0.311468	0.53144
ENSG00000004455	AK2	0.246424	0.492582	-0.192171	0.764278	-0.150571	0.502324	0.213877	0.325832	-0.276916	0.404517	-0.228682	0.295285	-0.054342	0.815075	-0.479735	0.0655748	-0.438183	0.0380835	-0.139593	0.544284	-0.651368	0.00752972	0.0823699	0.839918	0.128638	0.630246	-0.590488	0.0374642	-0.143431	0.834197	0.479724	0.0380568	-0.633234	0.0146194
ENSG00000270070	AK3	0.198027	0.667205	NA	NA	1.09547	1.81705e-06	0.712346	0.00201675	0.330235	0.368756	1.04329	5.54339e-06	0.746272	0.00114976	0.11461	0.756541	-0.0553593	0.834461	0.0805774	0.761601	0.22765	0.47893	NA	NA	NA	NA	NA	NA	NA	NA	NA	NA	NA	NA
ENSG00000147853	AK3	0.223244	0.553125	-0.000771287	0.999513	1.16734	1.53318e-08	0.777831	0.000148767	0.412253	0.17653	1.13996	3.10649e-08	0.769737	0.000164638	0.261333	0.363443	-0.0216956	0.928888	0.0938912	0.69077	0.329356	0.21857	0.202947	0.592068	0.359544	0.153196	0.318972	0.247278	0.238759	0.575384	0.195367	0.427486	0.193083	0.449405
ENSG00000230042	AK3P3	NA	NA	NA	NA	0.865839	0.0558949	0.990091	0.0222465	NA	NA	1.15818	0.0105863	1.05191	0.0197333	NA	NA	-0.214115	0.676853	0.308353	0.520333	NA	NA	NA	NA	NA	NA	NA	NA	NA	NA	1.61854	0.00836298	NA	NA
ENSG00000162433	AK4	2.04513	0.00181295	-0.553583	0.503585	2.02518	0.000345273	1.00236	0.0589124	-0.301797	0.776032	0.935978	0.052596	-0.17616	0.728876	-0.214342	0.769658	-1.46191	0.00287521	-1.67151	0.00092585	-0.990817	0.0803875	-0.084003	0.92161	-0.681678	0.158453	-1.09708	0.0389391	-0.20964	0.887399	-0.996017	0.0334989	-1.43058	0.00561765
ENSG00000263535	AK4P1	1.1705	0.105672	NA	NA	1.33322	0.014396	NA	NA	NA	NA	0.719448	0.140056	0.0802607	0.881113	0.0287934	0.974177	-1.83078	0.000273729	-2.0993	5.856e-05	-0.938374	0.0774409	NA	NA	NA	NA	NA	NA	NA	NA	NA	NA	NA	NA
ENSG00000154027	AK5	0.839449	0.0557167	0.370268	0.468049	-2.081	1.24771e-06	-2.81471	1.38607e-08	0.00230194	0.997193	-2.48102	8.18153e-08	-2.89907	6.4224e-09	0.347633	0.443941	-2.43746	1.48729e-07	-2.81982	1.78034e-08	-0.0806129	0.880508	-0.0793438	0.871338	-2.10405	8.87135e-07	0.0938844	0.814548	-0.395772	0.387324	-1.56181	1.19433e-05	0.112099	0.732095
ENSG00000085231	AK6	NA	NA	-0.172957	0.881735	NA	NA	NA	NA	NA	NA	NA	NA	NA	NA	NA	NA	NA	NA	NA	NA	NA	NA	-0.112755	0.844669	-0.866998	0.0173873	-0.468818	0.242675	-0.382808	0.523299	-0.312451	0.346151	-0.452227	0.196452
ENSG00000140057	AK7	NA	NA	NA	NA	8.07686	8.54514e-10	8.52912	2.79161e-10	NA	NA	7.21808	1.47395e-09	7.81116	3.07827e-10	NA	NA	9.67739	1.38648e-08	9.23772	5.08922e-08	NA	NA	NA	NA	4.35488	9.07801e-08	NA	NA	NA	NA	3.90052	7.28731e-08	NA	NA
ENSG00000165695	AK8	NA	NA	0.116918	0.963491	3.85971	9.31668e-07	4.4961	5.76348e-08	NA	NA	4.32939	2.67731e-07	5.24128	6.03961e-09	NA	NA	3.54384	2.35811e-07	3.7266	1.09409e-07	1.96262	0.00472149	0.365441	0.615271	1.45624	0.00395208	1.0392	0.0472102	0.588541	0.43077	2.27261	2.13234e-05	1.44065	0.003466
ENSG00000155085	AK9	NA	NA	-0.593376	0.112179	NA	NA	NA	NA	NA	NA	NA	NA	NA	NA	NA	NA	NA	NA	NA	NA	NA	NA	1.1388	0.00138443	2.61941	1.63629e-08	1.27729	0.000220865	0.533419	0.129226	1.94077	1.08703e-07	1.03194	0.000501217
ENSG00000121057	AKAP1	-0.513049	0.0645232	0.23211	0.791098	-0.741268	0.000434277	-0.482966	0.0239705	0.382486	0.231682	-0.139151	0.550457	-0.0578738	0.809217	0.194461	0.532585	-0.236927	0.295216	-0.126551	0.59632	-0.205114	0.493419	-0.467249	0.347748	-0.311634	0.3773	0.449691	0.237861	-0.210481	0.797364	-0.556434	0.0966409	0.532783	0.111505
ENSG00000108599	AKAP10	-0.0126496	0.985088	-0.160904	0.905632	-0.423525	0.057551	-0.660383	0.00248691	0.0899277	0.840451	-0.565865	0.0102465	-0.770672	0.000380373	0.106864	0.76103	-0.0320047	0.900388	-0.27615	0.233989	0.22728	0.452749	-0.202996	0.738783	0.0413244	0.926633	0.313863	0.496768	0.139784	0.921026	-0.406635	0.288381	0.193027	0.645273
ENSG00000023516	AKAP11	-0.0608206	0.905817	0.0890016	0.990195	0.228783	0.295646	0.434292	0.0380489	0.271809	0.416016	0.0724132	0.755879	0.141314	0.526313	0.111763	0.730314	0.174106	0.439022	0.225795	0.310621	0.176246	0.54577	-0.489729	0.68518	1.14874	0.153317	-0.00596675	0.995939	0.18537	0.95344	0.309556	0.696496	-0.302448	0.728078
ENSG00000131016	AKAP12	0.484842	0.346174	-0.138149	0.974573	0.65658	0.0484947	-0.13509	0.70122	0.46689	0.360511	-0.12358	0.725405	-0.676183	0.0427213	0.466683	0.287252	-0.522584	0.119459	-0.789715	0.0207303	-0.896791	0.0299842	-0.639564	0.566245	-0.421367	0.589169	-0.0841438	0.935331	-0.369297	0.862143	-0.807276	0.262611	-0.364108	0.647507
ENSG00000170776	AKAP13	-0.871101	0.000210131	-0.0637342	0.963491	0.916009	1.08591e-05	0.870931	2.88627e-05	0.22163	0.537347	1.68195	2.86387e-12	1.7127	2.4231e-12	0.663975	0.00998877	1.97449	2.36925e-13	2.05961	1.36325e-13	0.430844	0.100368	-0.436136	0.246921	1.13016	0.000266268	0.493443	0.0966737	-0.092578	0.926058	0.652335	0.0132218	0.746044	0.00727952
ENSG00000197976	AKAP17A	0.115587	0.825595	0.160592	0.768308	0.274613	0.247913	0.33074	0.15663	0.0727857	0.875451	0.0464289	0.857774	0.175561	0.46867	-0.118416	0.740415	0.235393	0.325033	0.191045	0.436953	-0.158433	0.62793	-0.646333	0.0201618	-0.633193	0.00659621	0.100255	0.720279	-0.468635	0.0965039	-0.660809	0.00306396	0.103004	0.660076
ENSG00000241978	AKAP2	0.768577	0.00416133	-0.189886	0.966046	1.28266	1.23888e-06	0.451444	0.03818	-0.0578837	0.894667	1.11868	9.62199e-06	0.504077	0.0207663	0.0162264	0.967099	-0.0209716	0.932246	-0.299677	0.177079	-0.173403	0.558462	-0.607885	0.635469	1.00575	0.240473	0.262376	0.811513	0.104554	0.981048	-0.0407816	0.964188	0.680543	0.425485
ENSG00000111254	AKAP3	NA	NA	NA	NA	2.20111	2.11393e-05	2.45878	4.1011e-06	NA	NA	2.64955	1.36381e-06	2.87702	3.32937e-07	NA	NA	2.88489	2.38513e-07	2.36645	4.89472e-06	1.48358	0.00730734	NA	NA	2.83263	4.95013e-07	NA	NA	NA	NA	NA	NA	NA	NA
ENSG00000179841	AKAP5	0.24792	0.683311	NA	NA	0.403936	0.224137	0.0746747	0.834833	-0.220416	0.695241	-0.222546	0.523788	-0.293347	0.384701	-0.545275	0.165126	1.08764	0.000950242	0.715471	0.0328291	-0.0304329	0.956408	NA	NA	2.70373	0.00327202	NA	NA	NA	NA	NA	NA	NA	NA
ENSG00000151320	AKAP6	-0.773107	0.0261812	-0.442598	0.733909	2.36875	4.68598e-10	2.00876	8.97669e-09	0.542978	0.177742	2.44511	3.65321e-10	2.35706	6.97894e-10	0.595196	0.0951167	2.95362	2.15818e-11	2.14226	5.79937e-09	1.16688	0.000446494	0.747524	0.344554	2.74869	5.22375e-05	-0.116518	0.876559	1.40852	0.0271247	1.67875	0.00207462	0.611345	0.257356
ENSG00000118507	AKAP7	-0.0279785	0.974808	0.0690993	0.956461	-0.320824	0.335569	-0.773823	0.0144157	0.167165	0.774934	-0.513877	0.11676	-1.05906	0.000819874	0.060602	0.906813	-0.462303	0.156989	-0.884514	0.00526474	-0.213324	0.631478	0.0685096	0.873901	-0.401455	0.124383	0.0391202	0.911975	0.0824126	0.932351	-0.933072	0.000783123	0.0277343	0.928139
ENSG00000105127	AKAP8	0.292419	0.458741	0.185206	0.503585	-0.995484	1.34316e-05	-1.18381	2.57653e-07	-0.282055	0.455622	-1.2626	4.40959e-08	-1.32736	8.49531e-09	-0.466582	0.116927	-1.19442	2.44221e-07	-1.38118	3.52395e-09	-0.449374	0.119787	-0.690386	0.00130337	-1.47217	3.45483e-08	-0.344869	0.0517967	-0.420424	0.0323886	-1.55223	9.63012e-09	-0.384346	0.0193061
ENSG00000011243	AKAP8L	-0.122138	0.800849	-0.178283	0.893727	0.398899	0.0652248	0.390115	0.071111	-0.0661554	0.879795	0.061209	0.799267	0.110801	0.633012	0.0219108	0.954976	0.11269	0.634978	0.0373184	0.882495	-0.0896012	0.791073	-0.256929	0.663288	-0.352919	0.382638	0.187572	0.710637	-0.593591	0.295771	-0.0794446	0.843809	0.470718	0.22521
ENSG00000127914	AKAP9	-0.205134	0.592392	-0.335149	0.590967	0.652549	0.00151267	0.564791	0.00620814	0.557373	0.0549179	0.360234	0.090083	0.371695	0.0769652	0.625344	0.0131282	0.254864	0.244443	0.368146	0.0863296	0.689192	0.00440353	-0.116685	0.819939	-0.403596	0.210933	0.415351	0.256342	-0.264325	0.685764	-0.506273	0.0891356	0.8235	0.0107782
ENSG00000155085	AKD1	-0.456756	0.246046	NA	NA	1.42827	5.08509e-08	1.28429	8.93669e-07	0.192087	0.691259	1.80965	1.74957e-11	1.71818	1.37489e-10	0.645516	0.0501281	1.62873	1.21614e-09	1.55914	5.54819e-09	0.608552	0.0582598	NA	NA	NA	NA	NA	NA	NA	NA	NA	NA	NA	NA
ENSG00000166452	AKIP1	0.0986844	0.867013	0.0523181	0.956032	-0.280221	0.285387	-0.624233	0.0126853	-0.115269	0.816442	-0.433768	0.0908747	-0.740874	0.00286313	0.0101249	0.983274	-0.439338	0.0865893	-0.395213	0.12734	0.0521261	0.90135	-0.121468	0.660491	-0.665175	0.00115537	-0.74512	0.00101143	-0.147889	0.704432	-0.430993	0.0144137	-0.356787	0.0545728
ENSG00000174574	AKIRIN1	0.251283	0.518885	0.149416	0.955742	0.47091	0.0339174	0.4414	0.0472361	-0.255363	0.485739	0.390095	0.0828414	0.310959	0.169244	-0.362834	0.213193	0.493065	0.0266289	0.3065	0.184253	-0.565965	0.0328222	-0.563572	0.491154	0.473495	0.395973	-0.588626	0.344228	-0.133687	0.951722	-0.216979	0.69564	-0.972935	0.0775023
ENSG00000135334	AKIRIN2	-0.0308018	0.961838	-0.124488	0.81284	-0.268388	0.255506	-0.294534	0.206568	-0.221886	0.568564	-0.35121	0.131781	-0.472607	0.0372592	0.118147	0.738928	0.217147	0.365726	0.229416	0.342991	-0.0893978	0.802419	0.0381799	0.905115	-0.232405	0.222561	0.5373	0.0112367	0.00589906	0.996159	-0.0698416	0.703731	0.537367	0.00489083
ENSG00000106948	AKNA	0.316258	0.494845	0.19755	0.622553	0.29286	0.301969	-0.0924787	0.758827	-0.303189	0.494078	-0.0362258	0.906153	-0.231702	0.420094	-0.404847	0.254631	1.3757	9.39399e-07	0.82466	0.00257636	0.226837	0.556056	-0.633733	0.0131784	-0.501677	0.0169891	0.422138	0.0580639	-0.608224	0.0143785	-0.859233	0.000134346	0.0879901	0.686952
ENSG00000162641	AKNAD1	-0.798181	0.108027	0.11447	0.957939	-1.76617	2.00663e-05	-1.47793	0.000196455	-0.0879181	0.907304	-0.93501	0.0300294	-1.06404	0.0116859	-0.411902	0.437743	-0.908583	0.0427226	-1.19994	0.00601684	-0.21134	0.72826	0.140405	0.84096	-1.15146	0.0139849	1.37299	0.00349716	NA	NA	NA	NA	1.35607	0.00193741
ENSG00000117448	AKR1A1	-0.0468418	0.930919	-0.0696426	0.978204	-0.204686	0.355444	-0.328619	0.12464	-0.10017	0.810697	0.0851887	0.714489	-0.0597448	0.798615	-0.034976	0.926048	0.375168	0.0811914	0.266	0.229916	0.0970235	0.767466	0.729457	0.175861	-0.575847	0.154795	-0.292992	0.549785	0.365236	0.62315	0.0769038	0.850631	-0.117816	0.791024
ENSG00000085662	AKR1B1	0.349323	0.527777	0.131295	0.911676	1.66704	8.72662e-06	1.57926	1.7877e-05	-0.573692	0.229451	2.41737	3.61935e-08	2.58287	1.05849e-08	-0.411203	0.338801	2.0156	7.27038e-07	2.18929	2.40583e-07	-0.108494	0.825248	0.881625	0.0319032	0.832551	0.0134245	0.741266	0.0412621	0.547525	0.207985	1.06357	0.000983397	0.307673	0.345744
ENSG00000198074	AKR1B10	0.0474584	0.973186	NA	NA	1.88174	0.000454879	1.00972	0.044167	-0.911314	0.262217	1.92707	0.000347613	1.48902	0.00358756	-0.600978	0.393393	2.93501	2.59539e-06	2.77542	6.07116e-06	NA	NA	NA	NA	2.06664	0.00788972	NA	NA	1.6916	0.0328569	1.93277	0.00268624	NA	NA
ENSG00000213452	AKR1B1P2	NA	NA	0.129702	0.970957	NA	NA	NA	NA	NA	NA	NA	NA	NA	NA	NA	NA	NA	NA	NA	NA	NA	NA	1.00558	0.246921	0.824021	0.194215	0.525288	0.484958	0.659899	0.552208	1.16858	0.0475312	NA	NA
ENSG00000266899	AKR1B1P7	NA	NA	NA	NA	NA	NA	NA	NA	NA	NA	NA	NA	NA	NA	NA	NA	NA	NA	NA	NA	NA	NA	0.891203	0.109134	0.629793	0.143279	0.630104	0.180881	NA	NA	0.940216	0.0209076	NA	NA
ENSG00000187134	AKR1C1	-1.81632	0.0426799	-0.294001	0.819214	1.84589	0.00758838	0.633916	0.343655	0.269022	0.833203	1.77951	0.0112566	1.09538	0.106862	1.07373	0.226727	1.72926	0.0132813	1.62515	0.0197127	0.993678	0.2473	1.68883	0.00337318	0.397838	0.38694	-0.433096	0.419756	1.29281	0.0143869	0.501252	0.234193	-0.184019	0.710757
ENSG00000151632	AKR1C2	-1.0495	0.426716	-0.75581	0.353843	5.26951	3.33878e-07	3.90011	1.49746e-05	0.240239	0.872604	4.01035	1.75405e-05	3.69238	4.49461e-05	0.494095	0.686579	4.27978	1.51252e-05	3.97075	4.06514e-05	NA	NA	1.84267	0.00548182	1.17453	0.0269821	-0.944416	0.121596	1.26867	0.0341346	1.41436	0.00406165	0.254648	0.639633
ENSG00000196139	AKR1C3	-3.46317	0.000338661	-0.15639	0.963563	3.37965	1.20215e-06	2.57094	4.6693e-05	0.226938	0.838176	5.09399	7.5553e-08	4.94288	1.18604e-07	NA	NA	2.75375	1.52361e-05	2.49305	5.36831e-05	0.723116	0.280956	2.79437	0.00119307	2.50057	0.000633345	-0.771158	0.32012	2.51154	0.00105615	3.09515	2.32147e-05	NA	NA
ENSG00000215267	AKR1C7P	NA	NA	NA	NA	NA	NA	NA	NA	NA	NA	NA	NA	NA	NA	NA	NA	3.9159	0.000114276	NA	NA	NA	NA	NA	NA	NA	NA	NA	NA	NA	NA	NA	NA	NA	NA
ENSG00000122787	AKR1D1	NA	NA	NA	NA	3.49082	9.15431e-06	NA	NA	NA	NA	NA	NA	NA	NA	NA	NA	4.75464	1.72357e-07	4.30485	9.03995e-07	NA	NA	NA	NA	NA	NA	NA	NA	NA	NA	NA	NA	NA	NA
ENSG00000165568	AKR1E2	NA	NA	NA	NA	NA	NA	NA	NA	NA	NA	NA	NA	NA	NA	NA	NA	NA	NA	NA	NA	NA	NA	NA	NA	0.291507	0.524939	NA	NA	NA	NA	0.572298	0.154915	0.0217943	0.9671
ENSG00000053371	AKR7A2	-0.0683518	0.894379	-0.0031117	0.998656	0.695229	0.000803439	0.685947	0.000920806	0.176181	0.638441	0.661146	0.00149921	0.72765	0.000414861	0.136822	0.669254	0.314994	0.148771	0.359501	0.0978492	0.146453	0.631907	0.438923	0.16087	0.9542	0.000345377	0.0258876	0.9391	0.369971	0.248767	1.15006	1.45744e-05	0.100269	0.692773
ENSG00000162482	AKR7A3	-0.722386	0.198104	NA	NA	0.810698	0.0425847	1.12883	0.00326014	0.599774	0.282388	1.24859	0.00219565	1.54524	0.000105758	0.4452	0.414616	0.631194	0.132211	0.64249	0.119957	-0.101804	0.87527	NA	NA	0.773219	0.207535	NA	NA	NA	NA	NA	NA	NA	NA
ENSG00000211454	AKR7L	-0.502085	0.488224	NA	NA	0.473686	0.272248	1.24763	0.00277146	0.446903	0.501668	1.33824	0.00216817	1.56003	0.000420232	0.285693	0.648913	-0.00353571	0.993876	0.2701	0.532956	-0.427421	0.420068	NA	NA	NA	NA	NA	NA	NA	NA	NA	NA	NA	NA
ENSG00000142208	AKT1	0.0815517	0.868438	-0.0303926	0.987399	-0.844804	4.11105e-05	-0.702439	0.000665751	-0.338457	0.287402	-0.669174	0.00126168	-0.490182	0.0188676	-0.377411	0.164238	-0.82163	8.0263e-05	-0.669041	0.0014194	-0.398209	0.127138	0.0664442	0.8617	-0.416572	0.0768784	-0.226808	0.409204	-0.0576188	0.952606	0.249382	0.243388	0.197343	0.403108
ENSG00000204673	AKT1S1	0.232891	0.548944	-0.388167	0.475264	-1.66065	2.25753e-12	-1.45526	3.17142e-11	-0.479239	0.121267	-1.62351	4.01655e-12	-1.35275	2.7245e-10	-0.322383	0.264801	-1.05874	7.8866e-07	-0.858817	6.0517e-05	-0.118182	0.719546	-0.121963	0.807103	-1.60589	3.74518e-05	0.00477365	0.992705	-0.363634	0.482561	-1.15239	0.000488567	0.0339284	0.927759
ENSG00000105221	AKT2	-0.131213	0.771273	0.0523722	0.902901	-1.09713	8.99112e-08	-1.1407	2.78787e-08	0.0125898	0.978342	-0.978274	1.7148e-06	-0.979998	1.53936e-06	0.128516	0.683285	-0.966945	3.10379e-06	-0.85952	3.42966e-05	0.0321694	0.927983	-0.19045	0.305171	-0.639539	5.37381e-05	-0.0449254	0.785375	-0.118082	0.601104	-0.649563	2.81658e-05	-0.166394	0.187886
ENSG00000117020	AKT3	0.255461	0.592108	-0.285265	0.716816	0.0425601	0.884355	-0.409709	0.130951	0.195107	0.67658	-0.0174457	0.952754	-0.588636	0.0306125	0.340797	0.335954	0.0952586	0.746633	0.028226	0.92642	0.356948	0.294353	-0.00651609	0.992734	0.607746	0.0803266	0.755705	0.0449681	0.378795	0.493587	0.207301	0.546231	0.622643	0.0659963
ENSG00000166971	AKTIP	-0.115531	0.824954	-0.0968041	0.87168	-0.0925376	0.713019	0.0833132	0.741859	0.0544296	0.909992	0.138449	0.577968	0.303044	0.194262	-0.0236922	0.95414	0.149409	0.545953	0.350573	0.136543	0.126541	0.714287	0.0187556	0.960086	0.562523	0.00629767	-0.191799	0.382158	0.0153526	0.989067	0.258153	0.167637	-0.376149	0.0501667
ENSG00000223474	AL020996.1	NA	NA	NA	NA	NA	NA	0.825002	0.201975	NA	NA	NA	NA	0.62613	0.327356	0.0310221	0.978978	1.0451	0.119459	1.01942	0.128579	NA	NA	NA	NA	NA	NA	NA	NA	NA	NA	NA	NA	NA	NA
ENSG00000213062	AL021068.1	NA	NA	NA	NA	1.91989	0.000762041	2.69694	9.88195e-06	NA	NA	1.62269	0.00197624	2.05211	0.000144712	NA	NA	1.67982	0.00169318	2.08009	0.000182854	NA	NA	NA	NA	NA	NA	NA	NA	NA	NA	NA	NA	NA	NA
ENSG00000203583	AL021707.1	-0.113456	0.86726	NA	NA	-0.738078	0.0131146	-0.482489	0.11053	-0.172017	0.755391	-0.563153	0.0649347	-0.550196	0.0685524	0.0330846	0.949495	-0.430873	0.173542	-0.447808	0.156997	-0.120261	0.799596	NA	NA	NA	NA	NA	NA	NA	NA	NA	NA	NA	NA
ENSG00000257034	AL021707.2	-0.120647	0.860723	NA	NA	-0.748658	0.0112485	-0.393361	0.194734	-0.122799	0.830517	-0.542262	0.0739487	-0.464746	0.124464	-0.0811142	0.867602	-0.358888	0.260206	-0.337378	0.29318	0.042622	0.933928	NA	NA	NA	NA	NA	NA	NA	NA	NA	NA	NA	NA
ENSG00000256873	AL021977.1	0.120167	0.821989	NA	NA	0.696439	0.00268583	0.704992	0.00231185	-0.117295	0.798947	0.672676	0.00387819	0.8747	0.000137642	-0.0414432	0.920334	0.277743	0.259804	0.25635	0.304158	-0.0562453	0.886309	NA	NA	NA	NA	NA	NA	NA	NA	NA	NA	NA	NA
ENSG00000233515	AL022344.4	-4.59184	3.94836e-05	NA	NA	0.956039	0.0862308	1.47259	0.00836443	0.670671	0.429386	NA	NA	NA	NA	NA	NA	4.0499	7.42555e-06	NA	NA	NA	NA	NA	NA	NA	NA	NA	NA	NA	NA	NA	NA	NA	NA
ENSG00000269549	AL031663.2	NA	NA	NA	NA	1.81758	0.000225289	2.11839	2.27633e-05	NA	NA	NA	NA	2.34561	3.11926e-05	NA	NA	2.20636	8.51677e-05	2.86432	1.54186e-06	NA	NA	NA	NA	NA	NA	NA	NA	NA	NA	NA	NA	NA	NA
ENSG00000247315	AL034548.1	-0.0678895	0.91439	NA	NA	-1.74217	7.87137e-11	-1.71038	1.15343e-10	-0.0484674	0.931501	-1.71061	1.24573e-10	-1.75283	7.46304e-11	-0.0808193	0.852627	-1.65883	3.82768e-10	-1.77335	1.17191e-10	-0.373573	0.267058	NA	NA	NA	NA	NA	NA	NA	NA	NA	NA	NA	NA
ENSG00000234009	AL049757.3	0.132111	0.860913	NA	NA	0.256412	0.469216	-0.116115	0.751724	0.239108	0.674978	-0.0557321	0.882191	0.113981	0.755633	-0.0927785	0.860264	-0.160997	0.663186	-0.169497	0.648042	-0.186372	0.701429	NA	NA	NA	NA	NA	NA	NA	NA	NA	NA	NA	NA
ENSG00000224997	AL049840.1	-0.663393	0.172601	NA	NA	-0.685153	0.0663903	-0.959293	0.00839723	0.0769675	0.915266	-0.291611	0.470917	-0.267517	0.500976	0.754171	0.0813583	-0.716226	0.0670175	-0.463044	0.243402	0.0695143	0.908685	NA	NA	NA	NA	NA	NA	NA	NA	NA	NA	NA	NA
ENSG00000203863	AL079342.1	NA	NA	NA	NA	1.94446	0.000409169	2.4194	2.08361e-05	NA	NA	NA	NA	2.7584	1.42785e-05	NA	NA	NA	NA	NA	NA	NA	NA	NA	NA	NA	NA	NA	NA	NA	NA	NA	NA	NA	NA
ENSG00000267848	AL118506.1	NA	NA	NA	NA	NA	NA	NA	NA	NA	NA	NA	NA	NA	NA	NA	NA	NA	NA	4.08758	5.31355e-05	NA	NA	NA	NA	NA	NA	NA	NA	NA	NA	NA	NA	NA	NA
ENSG00000225746	AL132709.5	0.0893271	0.899157	NA	NA	0.733239	0.0125153	0.0467896	0.888341	-0.156331	0.780034	1.39081	2.46643e-05	1.04708	0.000616955	0.112667	0.808561	0.198023	0.539736	-0.262758	0.41301	-0.205767	0.628105	NA	NA	NA	NA	NA	NA	NA	NA	NA	NA	NA	NA
ENSG00000232018	AL132709.8	0.385643	0.470043	NA	NA	0.969566	0.00310829	0.366925	0.275844	-0.103345	0.871265	0.955882	0.00343348	0.625134	0.0537928	-0.235924	0.606622	0.486021	0.145711	-0.0254646	0.946173	-0.227808	0.615323	NA	NA	NA	NA	NA	NA	NA	NA	NA	NA	NA	NA
ENSG00000225119	AL133216.1	-0.595978	0.288061	NA	NA	0.181696	0.666212	0.470145	0.226418	0.72542	0.155445	0.669807	0.0940644	0.753556	0.0540245	1.00547	0.0222228	0.5156	0.216904	0.104771	0.821352	0.623784	0.194274	NA	NA	NA	NA	NA	NA	NA	NA	NA	NA	NA	NA
ENSG00000197146	AL133458.1	NA	NA	NA	NA	NA	NA	1.56659	0.00828966	NA	NA	NA	NA	1.33724	0.0263154	NA	NA	-0.377845	0.506798	-0.154855	0.791381	0.569094	0.405793	NA	NA	NA	NA	NA	NA	NA	NA	NA	NA	NA	NA
ENSG00000233922	AL133493.2	NA	NA	NA	NA	4.94834	1.18365e-10	5.00789	1.02056e-10	NA	NA	4.6058	2.36029e-10	4.55957	2.55316e-10	NA	NA	4.06914	1.4402e-08	3.61065	1.23382e-07	NA	NA	NA	NA	NA	NA	NA	NA	NA	NA	NA	NA	NA	NA
ENSG00000260669	AL136419.6	-0.253108	0.511308	NA	NA	-0.426109	0.054057	-0.108624	0.651113	-0.0568506	0.902024	-0.183029	0.434804	0.0908796	0.70544	0.167085	0.608963	-0.0187208	0.941237	0.26021	0.261268	0.370815	0.183274	NA	NA	NA	NA	NA	NA	NA	NA	NA	NA	NA	NA
ENSG00000215244	AL137145.1	NA	NA	NA	NA	NA	NA	NA	NA	NA	NA	3.78846	2.35742e-05	NA	NA	NA	NA	3.1902	2.20359e-05	3.2023	1.73693e-05	NA	NA	NA	NA	NA	NA	NA	NA	NA	NA	NA	NA	NA	NA
ENSG00000268404	AL138781.1	NA	NA	NA	NA	0.344218	0.486628	NA	NA	0.793929	0.215317	NA	NA	1.05129	0.0248522	NA	NA	2.74	1.54945e-06	2.634	2.69642e-06	NA	NA	NA	NA	NA	NA	NA	NA	NA	NA	NA	NA	NA	NA
ENSG00000253459	AL139099.1	0.699083	0.23461	NA	NA	-0.842641	0.0496819	-0.501938	0.230879	0.0649802	0.938546	-1.58416	0.00053153	-1.30289	0.00257849	-0.322712	0.56494	-0.987618	0.0258074	-0.941946	0.0315852	0.325167	0.565645	NA	NA	NA	NA	NA	NA	NA	NA	NA	NA	NA	NA
ENSG00000255831	AL139385.1	0.0767233	0.905762	NA	NA	-0.39884	0.141477	-0.299642	0.276137	-0.0634899	0.907977	-0.511923	0.0577183	-0.487558	0.0689264	-0.221558	0.563668	-0.418198	0.124648	-0.562031	0.0364337	-0.00512731	0.98999	NA	NA	NA	NA	NA	NA	NA	NA	NA	NA	NA	NA
ENSG00000256545	AL139819.1	0.679208	0.659711	NA	NA	0.408113	0.62969	0.294829	0.73269	-0.380029	0.806922	0.984721	0.231011	0.69257	0.401279	-0.337251	0.788329	-0.0070982	0.993577	-0.0631614	0.944275	-1.15242	0.272872	NA	NA	NA	NA	NA	NA	NA	NA	NA	NA	NA	NA
ENSG00000212670	AL161915.1	-0.548416	0.370981	NA	NA	-0.717649	0.0813409	0.172008	0.686009	0.194138	0.785458	-0.253315	0.575303	0.431313	0.299585	0.195882	0.740025	NA	NA	0.631196	0.13974	0.974362	0.0495275	NA	NA	NA	NA	NA	NA	NA	NA	NA	NA	NA	NA
ENSG00000234631	AL162407.1	-0.115523	0.853507	NA	NA	-0.961886	0.000844933	-1.11571	0.000170308	0.434447	0.276109	-1.15201	0.000128505	-1.40466	9.43795e-06	0.485297	0.155437	-0.92748	0.00134007	-1.13771	0.000168919	0.342582	0.32947	NA	NA	NA	NA	NA	NA	NA	NA	NA	NA	NA	NA
ENSG00000255813	AL162497.1	-0.413891	0.424657	NA	NA	1.79461	2.38781e-08	1.01134	0.00131247	0.205184	0.722577	2.00899	4.00774e-09	1.4978	2.52504e-06	1.21	0.00106421	2.01982	5.72136e-09	1.46567	5.37934e-06	1.13412	0.0020399	NA	NA	NA	NA	NA	NA	NA	NA	NA	NA	NA	NA
ENSG00000235269	AL162759.1	NA	NA	NA	NA	2.2417	0.00364093	NA	NA	NA	NA	2.56485	0.000465835	NA	NA	NA	NA	2.75001	0.000151733	1.31601	0.0478861	NA	NA	NA	NA	NA	NA	NA	NA	NA	NA	NA	NA	NA	NA
ENSG00000259171	AL163636.6	-1.18228	5.25288e-06	NA	NA	-0.85808	0.000281614	-0.776651	0.00102285	0.594959	0.0771103	0.439684	0.0734564	0.291844	0.241596	1.57341	1.08051e-07	0.159393	0.541679	0.314627	0.211033	1.0794	8.97785e-05	NA	NA	NA	NA	NA	NA	NA	NA	NA	NA	NA	NA
ENSG00000237356	AL163953.3	NA	NA	NA	NA	2.36785	2.0489e-05	2.19908	4.93222e-05	NA	NA	3.11892	8.8192e-07	3.0621	1.09144e-06	NA	NA	2.98774	4.84298e-06	2.8411	9.82707e-06	NA	NA	NA	NA	NA	NA	NA	NA	NA	NA	NA	NA	NA	NA
ENSG00000227921	AL353791.1	-1.29689	0.0204386	NA	NA	-1.30165	0.00616871	-1.70963	0.000524533	0.581122	0.337964	NA	NA	NA	NA	NA	NA	NA	NA	NA	NA	NA	NA	NA	NA	NA	NA	NA	NA	NA	NA	NA	NA	NA	NA
ENSG00000203276	AL353898.2	NA	NA	NA	NA	NA	NA	0.412579	0.381149	NA	NA	NA	NA	NA	NA	0.734912	0.181862	NA	NA	NA	NA	NA	NA	NA	NA	NA	NA	NA	NA	NA	NA	NA	NA	NA	NA
ENSG00000215615	AL354822.1	0.0437155	0.967057	NA	NA	0.191314	0.647772	0.798968	0.0314962	0.369284	0.544746	0.699158	0.0672226	0.818899	0.0269123	0.228191	0.672697	1.19858	0.00061984	1.21234	0.000541624	0.43015	0.335663	NA	NA	NA	NA	NA	NA	NA	NA	NA	NA	NA	NA
ENSG00000215428	AL354898.1	NA	NA	NA	NA	8.63389	6.39275e-07	7.49558	9.78119e-06	NA	NA	NA	NA	NA	NA	NA	NA	NA	NA	NA	NA	NA	NA	NA	NA	NA	NA	NA	NA	NA	NA	NA	NA	NA	NA
ENSG00000225996	AL356356.1	NA	NA	NA	NA	4.91339	1.14979e-08	4.07876	2.57119e-07	NA	NA	5.18331	3.71022e-09	4.15499	1.23839e-07	NA	NA	3.68189	8.98687e-07	3.35672	3.72585e-06	2.03926	0.00800642	NA	NA	NA	NA	NA	NA	NA	NA	NA	NA	NA	NA
ENSG00000212857	AL356585.1	NA	NA	NA	NA	NA	NA	NA	NA	NA	NA	NA	NA	NA	NA	NA	NA	0.432207	0.504713	NA	NA	NA	NA	NA	NA	NA	NA	NA	NA	NA	NA	NA	NA	NA	NA
ENSG00000215608	AL356585.2	-0.398883	0.528283	NA	NA	-2.79758	2.38781e-08	-2.19872	4.90886e-07	-0.74247	0.152905	-2.03931	3.11711e-06	-1.76532	1.49535e-05	-0.461983	0.347805	-1.80898	4.04019e-05	-1.23792	0.00313021	-0.290581	0.594365	NA	NA	NA	NA	NA	NA	NA	NA	NA	NA	NA	NA
ENSG00000234603	AL356740.1	0.321735	0.646528	NA	NA	1.2357	0.000748459	1.19734	0.00099299	0.889497	0.0766667	1.03657	0.00441798	1.10353	0.00205307	0.41362	0.389229	-0.425237	0.23981	-0.644238	0.0690813	0.0998369	0.853236	NA	NA	NA	NA	NA	NA	NA	NA	NA	NA	NA	NA
ENSG00000176082	AL357153.1	NA	NA	NA	NA	NA	NA	1.58174	0.00428209	NA	NA	NA	NA	NA	NA	1.15603	0.089673	NA	NA	NA	NA	NA	NA	NA	NA	NA	NA	NA	NA	NA	NA	NA	NA	NA	NA
ENSG00000248835	AL357673.1	-0.698069	0.072079	NA	NA	-0.267718	0.412696	0.46695	0.134834	0.282364	0.579317	0.332004	0.31113	0.800058	0.00937514	0.400176	0.31856	0.485469	0.131492	0.718152	0.02233	0.291945	0.493538	NA	NA	NA	NA	NA	NA	NA	NA	NA	NA	NA	NA
ENSG00000176868	AL358781.1	NA	NA	NA	NA	2.52495	1.29283e-05	3.18506	2.39106e-07	NA	NA	3.32602	3.11628e-07	3.60215	6.47124e-08	NA	NA	NA	NA	NA	NA	NA	NA	NA	NA	NA	NA	NA	NA	NA	NA	NA	NA	NA	NA
ENSG00000203815	AL358813.2	-1.17242	0.0641486	NA	NA	-2.38872	0.000145195	-2.733	2.6104e-05	-0.171666	0.844726	NA	NA	NA	NA	0.79161	0.207045	NA	NA	NA	NA	NA	NA	NA	NA	NA	NA	NA	NA	NA	NA	NA	NA	NA	NA
ENSG00000269783	AL358938.1	NA	NA	NA	NA	NA	NA	NA	NA	NA	NA	NA	NA	NA	NA	NA	NA	4.995	6.83232e-06	3.6997	0.00032692	NA	NA	NA	NA	NA	NA	NA	NA	NA	NA	NA	NA	NA	NA
ENSG00000257033	AL391357.1	0.0231223	0.981727	NA	NA	-0.116156	0.769486	-0.0118147	0.977146	0.0192452	0.979178	0.0171391	0.965907	0.334567	0.36121	0.193197	0.698456	-0.0285818	0.945102	-0.0567429	0.893764	0.256988	0.604033	NA	NA	NA	NA	NA	NA	NA	NA	NA	NA	NA	NA
ENSG00000189275	AL450307.1	NA	NA	NA	NA	NA	NA	NA	NA	NA	NA	NA	NA	NA	NA	NA	NA	2.68656	0.00347088	2.37359	0.00781862	NA	NA	NA	NA	NA	NA	NA	NA	NA	NA	NA	NA	NA	NA
ENSG00000234614	AL450992.2	-0.040362	0.975435	NA	NA	-0.168126	0.743119	-0.631399	0.192341	0.254096	0.7648	NA	NA	NA	NA	NA	NA	NA	NA	NA	NA	NA	NA	NA	NA	NA	NA	NA	NA	NA	NA	NA	NA	NA	NA
ENSG00000256142	AL513327.1	-0.354794	0.537644	NA	NA	-2.5575	4.95394e-08	-3.22261	1.45253e-09	0.287102	0.607162	-2.56039	6.17659e-08	-3.17409	2.2066e-09	0.379417	0.39773	-2.43229	1.7544e-07	-3.06365	5.84741e-09	0.0354078	0.948912	NA	NA	NA	NA	NA	NA	NA	NA	NA	NA	NA	NA
ENSG00000187461	AL583828.1	0.682877	0.187903	NA	NA	1.82543	1.19353e-06	2.03322	1.97936e-07	-0.479989	0.438141	1.51332	2.90044e-05	1.53059	2.09391e-05	-0.782217	0.084931	0.795202	0.045823	1.17298	0.0023947	-0.782447	0.123931	NA	NA	NA	NA	NA	NA	NA	NA	NA	NA	NA	NA
ENSG00000203849	AL583842.6	NA	NA	NA	NA	NA	NA	NA	NA	NA	NA	NA	NA	NA	NA	NA	NA	0.97546	0.187307	NA	NA	NA	NA	NA	NA	NA	NA	NA	NA	NA	NA	NA	NA	NA	NA
ENSG00000256239	AL589642.1	NA	NA	NA	NA	NA	NA	NA	NA	NA	NA	NA	NA	NA	NA	NA	NA	4.07983	6.26844e-07	3.30508	1.2558e-05	NA	NA	NA	NA	NA	NA	NA	NA	NA	NA	NA	NA	NA	NA
ENSG00000225210	AL589743.1	NA	NA	NA	NA	NA	NA	NA	NA	NA	NA	NA	NA	NA	NA	1.1246	0.139887	-0.0675683	0.903922	0.0624424	0.911829	0.780664	0.202907	NA	NA	NA	NA	NA	NA	NA	NA	NA	NA	NA	NA
ENSG00000240510	AL589765.1	NA	NA	NA	NA	NA	NA	7.70275	5.27476e-06	NA	NA	NA	NA	7.5612	6.44381e-06	NA	NA	NA	NA	NA	NA	NA	NA	NA	NA	NA	NA	NA	NA	NA	NA	NA	NA	NA	NA
ENSG00000255824	AL590369.1	1.49071	0.000286184	NA	NA	1.63817	7.87022e-06	1.176	0.000522898	-0.345939	0.506777	1.89271	8.58103e-07	1.48892	2.6436e-05	0.463026	0.258256	0.679139	0.0286976	0.585742	0.0594211	0.453988	0.250874	NA	NA	NA	NA	NA	NA	NA	NA	NA	NA	NA	NA
ENSG00000268172	AL590452.1	NA	NA	NA	NA	NA	NA	NA	NA	0.59204	0.573497	NA	NA	NA	NA	1.27264	0.144854	NA	NA	NA	NA	NA	NA	NA	NA	NA	NA	NA	NA	NA	NA	NA	NA	NA	NA
ENSG00000256225	AL590710.1	0.407262	0.394646	NA	NA	-0.971575	0.00143125	-1.33051	1.23274e-05	-0.271904	0.595838	-1.13793	0.000189233	-1.19096	8.23371e-05	-0.199192	0.649962	-1.37015	6.30195e-06	-1.71691	3.16967e-08	-0.515828	0.170576	NA	NA	NA	NA	NA	NA	NA	NA	NA	NA	NA	NA
ENSG00000255591	AL590762.1	0.0328511	0.957366	NA	NA	-0.791005	0.00026572	-0.796268	0.000243565	-0.139492	0.738615	-0.997054	4.27296e-06	-1.10697	3.45272e-07	-0.130193	0.700129	-0.919292	2.54727e-05	-0.884887	5.32433e-05	-0.19034	0.538571	NA	NA	NA	NA	NA	NA	NA	NA	NA	NA	NA	NA
ENSG00000224208	AL590762.6	-0.252749	0.739943	NA	NA	0.36373	0.366725	0.0353757	0.935611	0.115783	0.872735	0.0735486	0.866949	0.19928	0.633995	0.306051	0.555909	-0.721587	0.076814	-0.331729	0.431182	0.336107	0.508286	NA	NA	NA	NA	NA	NA	NA	NA	NA	NA	NA	NA
ENSG00000269554	AL590822.2	0.46173	0.551852	NA	NA	0.0645393	0.893619	-0.0856876	0.858507	0.0901997	0.923305	-0.820404	0.0706536	-0.399104	0.374072	-0.461267	0.443759	0.0554715	0.912551	0.251031	0.601544	0.0972383	0.894917	NA	NA	NA	NA	NA	NA	NA	NA	NA	NA	NA	NA
ENSG00000215020	AL591684.1	NA	NA	NA	NA	NA	NA	NA	NA	NA	NA	NA	NA	NA	NA	1.34652	0.0821519	-1.7081	0.00147512	-2.08695	0.000214734	0.317039	0.625588	NA	NA	NA	NA	NA	NA	NA	NA	NA	NA	NA	NA
ENSG00000116883	AL591845.1	-0.178738	0.780479	NA	NA	0.622288	0.0371963	0.491276	0.103201	0.148925	0.791564	0.718551	0.0166499	0.520694	0.0850617	0.425384	0.270368	0.41353	0.190212	0.0614087	0.863328	-0.706189	0.0569284	NA	NA	NA	NA	NA	NA	NA	NA	NA	NA	NA	NA
ENSG00000229021	AL591893.1	NA	NA	NA	NA	5.1166	1.0453e-09	3.45323	1.63914e-06	NA	NA	4.54727	5.01083e-09	3.60493	3.50057e-07	NA	NA	4.97447	4.56284e-09	4.45133	3.35192e-08	NA	NA	NA	NA	NA	NA	NA	NA	NA	NA	NA	NA	NA	NA
ENSG00000220023	AL592183.1	-0.513051	0.173798	NA	NA	0.145318	0.622735	0.724825	0.00669966	0.717813	0.0537706	0.47102	0.090203	1.0983	3.82055e-05	0.711892	0.0302936	0.589817	0.0338626	0.805742	0.00330502	1.02924	0.0011109	NA	NA	NA	NA	NA	NA	NA	NA	NA	NA	NA	NA
ENSG00000231360	AL592284.1	NA	NA	NA	NA	3.21961	2.08143e-07	2.0951	0.000122876	NA	NA	2.97536	6.46697e-07	2.45185	1.22898e-05	NA	NA	3.30495	1.12891e-06	2.47721	8.24538e-05	NA	NA	NA	NA	NA	NA	NA	NA	NA	NA	NA	NA	NA	NA
ENSG00000215033	AL603965.1	NA	NA	NA	NA	2.72441	9.39516e-07	NA	NA	NA	NA	2.02706	4.59323e-06	1.00032	0.0195886	0.738444	0.180387	-1.13785	0.000405112	-1.55506	9.57341e-06	0.0929237	0.85446	NA	NA	NA	NA	NA	NA	NA	NA	NA	NA	NA	NA
ENSG00000270167	AL606534.1	-0.0630613	0.954556	NA	NA	0.95666	0.0222519	0.99475	0.0145103	0.967067	0.0749314	0.580839	0.183956	0.668739	0.1153	0.879162	0.0675326	0.903375	0.0490058	0.632565	0.173848	0.734605	0.173739	NA	NA	NA	NA	NA	NA	NA	NA	NA	NA	NA	NA
ENSG00000267884	AL626787.1	NA	NA	NA	NA	NA	NA	NA	NA	NA	NA	NA	NA	5.27547	3.27769e-06	NA	NA	5.27301	1.17578e-07	4.34888	2.73726e-06	NA	NA	NA	NA	NA	NA	NA	NA	NA	NA	NA	NA	NA	NA
ENSG00000237683	AL627309.1	NA	NA	NA	NA	6.00816	8.01626e-07	NA	NA	NA	NA	NA	NA	NA	NA	NA	NA	0.302179	0.536194	-0.0398604	0.938929	0.443919	0.450488	NA	NA	NA	NA	NA	NA	NA	NA	NA	NA	NA	NA
ENSG00000215014	AL645728.1	NA	NA	NA	NA	NA	NA	NA	NA	NA	NA	NA	NA	0.598731	0.313188	NA	NA	NA	NA	0.61461	0.332807	NA	NA	NA	NA	NA	NA	NA	NA	NA	NA	NA	NA	NA	NA
ENSG00000215791	AL645728.2	0.736889	0.0307096	NA	NA	-1.46284	2.1623e-07	-1.78555	7.45132e-09	-0.546764	0.173148	-1.65082	2.68396e-08	-2.13097	2.83746e-10	-0.932914	0.00472382	-1.95363	2.53547e-09	-2.31597	1.41958e-10	-1.20899	0.00017583	NA	NA	NA	NA	NA	NA	NA	NA	NA	NA	NA	NA
ENSG00000256498	AL928654.1	-0.808295	0.0627169	NA	NA	-0.292797	0.436845	-0.297573	0.422445	0.323854	0.565361	0.0134991	0.973403	-0.127933	0.749347	0.721004	0.086892	0.483982	0.198538	0.0624115	0.883792	0.62975	0.149022	NA	NA	NA	NA	NA	NA	NA	NA	NA	NA	NA	NA
ENSG00000148218	ALAD	-0.0683816	0.892347	-0.967335	0.00025955	1.23803	2.12592e-07	1.6536	1.83875e-09	0.0947776	0.818971	1.30033	1.06898e-07	1.71311	9.90878e-10	0.178034	0.558401	1.46851	1.7816e-08	1.69819	1.68423e-09	0.390667	0.133688	0.549849	0.0221103	1.51193	1.50047e-07	0.217022	0.32591	0.358561	0.14477	1.42131	5.72876e-08	0.0834259	0.682954
ENSG00000023330	ALAS1	0.147681	0.739541	-0.0420984	0.944353	0.841622	4.69249e-05	0.972704	6.39759e-06	-0.391848	0.210518	0.960688	7.75365e-06	1.114	8.04803e-07	-0.504433	0.0560103	1.14683	6.46313e-07	1.0839	1.7881e-06	-0.361219	0.177306	0.0673164	0.743874	0.585935	0.000181846	-0.150405	0.330436	-0.0848788	0.786582	0.588893	6.19383e-05	-0.58179	0.000174515
ENSG00000163631	ALB	NA	NA	NA	NA	7.36254	3.29069e-08	6.92986	9.70254e-08	NA	NA	9.63559	3.26091e-08	9.26329	7.59323e-08	NA	NA	NA	NA	NA	NA	NA	NA	NA	NA	NA	NA	NA	NA	NA	NA	NA	NA	NA	NA
ENSG00000170017	ALCAM	0.235911	0.54593	-0.29307	0.939743	-0.0464366	0.848407	-0.655058	0.00225559	0.196913	0.603267	-0.192561	0.405873	-0.704255	0.000970475	0.136172	0.681241	-0.438129	0.0467251	-0.373641	0.0950282	-0.134932	0.676771	-0.844521	0.535148	0.465624	0.626804	-0.851145	0.420056	-0.183116	0.962939	-0.783556	0.377688	-0.297558	0.765935
ENSG00000161618	ALDH16A1	0.0151622	0.985309	-0.12033	0.915826	-2.05556	6.77993e-08	-2.67779	8.35194e-10	-0.634498	0.127313	-2.26375	1.6088e-08	-2.33012	7.91491e-09	-0.713912	0.0501921	-1.48561	1.01403e-05	-1.74906	1.15946e-06	-0.326591	0.376167	-0.385725	0.38581	-2.25089	6.93119e-07	-0.247214	0.506214	-0.579549	0.156319	-1.7636	5.00356e-06	-0.394332	0.198775
ENSG00000059573	ALDH18A1	0.153798	0.719054	0.0402493	0.955845	-1.02288	1.03534e-05	-0.844517	0.000108055	0.0171168	0.971021	-1.0432	7.96624e-06	-1.1577	1.3468e-06	-0.169439	0.580825	-1.49256	4.65743e-08	-1.31605	3.61904e-07	-0.337716	0.202198	0.0648779	0.773294	-0.939075	2.1225e-06	-1.06409	1.32627e-06	0.0208007	0.979107	-0.997909	3.1318e-07	-1.17227	2.16878e-07
ENSG00000165092	ALDH1A1	NA	NA	NA	NA	NA	NA	NA	NA	NA	NA	NA	NA	NA	NA	NA	NA	NA	NA	NA	NA	NA	NA	NA	NA	NA	NA	NA	NA	NA	NA	NA	NA	2.83843	0.00568965
ENSG00000128918	ALDH1A2	NA	NA	NA	NA	2.60375	1.45769e-06	1.60154	0.000864683	1.21896	0.0667719	1.7874	0.0001467	0.312793	0.505846	0.396814	0.511608	2.62907	1.45366e-06	1.04457	0.0234316	0.891604	0.115714	NA	NA	NA	NA	NA	NA	NA	NA	NA	NA	NA	NA
ENSG00000184254	ALDH1A3	-3.06175	1.29396e-06	0.523114	0.835438	-1.51141	0.000758693	-1.86676	7.99254e-05	1.4152	0.0257403	0.641407	0.130353	0.436683	0.30119	0.993611	0.0680735	-0.448891	0.292026	-0.994234	0.0212128	0.397766	0.482218	0.793297	0.545013	1.45201	0.103728	1.07709	0.278465	1.52548	0.180573	1.68273	0.0421717	0.456103	0.623562
ENSG00000137124	ALDH1B1	-0.119013	0.807655	0.529769	0.00572958	-0.4991	0.0201357	-0.450249	0.0366531	-0.80192	0.00744564	-0.242103	0.282108	-0.121491	0.600584	-0.859053	0.00100151	-0.191105	0.404539	0.0248359	0.921593	-0.836794	0.000757782	-0.364914	0.0836416	-0.824714	3.24236e-05	-0.709814	0.000240859	-0.129577	0.669265	-0.678604	0.000172413	-0.659971	0.000256273
ENSG00000144908	ALDH1L1	NA	NA	NA	NA	5.47435	6.85762e-07	5.18015	1.70118e-06	NA	NA	6.18113	5.67875e-07	5.77676	1.94559e-06	NA	NA	3.65101	5.9916e-06	2.99087	6.99255e-05	NA	NA	NA	NA	NA	NA	NA	NA	NA	NA	NA	NA	NA	NA
ENSG00000136010	ALDH1L2	-0.815524	0.0317346	-0.0559418	0.987213	-1.7559	1.2353e-06	-2.43957	7.99582e-09	0.107523	0.849976	-0.808221	0.00755909	-1.57118	6.91329e-06	0.286387	0.478245	-0.499184	0.093202	-1.08751	0.000674397	0.474702	0.200134	-0.602944	0.323385	-1.1063	0.0135011	-1.96404	0.000306754	-0.155908	0.920398	-1.59179	0.000702017	-1.56211	0.00128873
ENSG00000111275	ALDH2	-0.930939	0.000159632	-0.982924	0.0152493	0.883646	4.90893e-05	0.784505	0.000323575	0.0224591	0.965064	1.35968	8.2055e-10	1.35464	9.04374e-10	-0.0194299	0.962955	0.372812	0.100944	0.345312	0.133094	0.453804	0.0977529	1.24301	0.00170032	1.32518	0.000207087	0.5534	0.110475	0.547916	0.180226	0.831412	0.00468866	0.591466	0.0511169
ENSG00000108602	ALDH3A1	-0.459109	0.709245	NA	NA	-0.991856	0.114761	-1.51962	0.0183602	0.571547	0.585544	-0.67737	0.289416	-1.23695	0.051986	0.974206	0.233595	-0.268176	0.724092	-0.91071	0.220368	0.896126	0.316596	NA	NA	NA	NA	NA	NA	NA	NA	NA	NA	NA	NA
ENSG00000072210	ALDH3A2	-0.761666	0.00116532	-0.94761	0.00663536	-0.295785	0.167048	-0.542647	0.00850879	0.44054	0.14099	0.160934	0.471928	0.127445	0.568542	0.163849	0.595413	0.717652	0.000554771	0.725521	0.000492867	-0.113165	0.722869	0.507835	0.180764	1.78189	2.52355e-06	-0.63125	0.037474	0.195859	0.732527	1.09139	0.000244448	-1.14367	0.000355326
ENSG00000006534	ALDH3B1	-0.119327	0.862758	-0.445574	0.224663	-1.899	8.6519e-07	-2.70122	3.79816e-09	0.595974	0.180403	-1.63078	8.34156e-06	-2.76873	2.61167e-09	0.865725	0.0264918	-0.767543	0.0159666	-1.40535	7.67748e-05	1.23151	0.00192699	-0.0511036	0.910919	-1.59082	5.00267e-06	-0.037031	0.918525	0.0237074	0.988054	-1.78258	8.58874e-07	0.269854	0.301817
ENSG00000132746	ALDH3B2	0.0366063	0.975435	NA	NA	-0.334175	0.489939	-1.14212	0.0119207	0.506737	0.423814	NA	NA	NA	NA	0.539913	0.300032	1.15277	0.0189887	NA	NA	1.32074	0.0177131	NA	NA	NA	NA	NA	NA	NA	NA	NA	NA	NA	NA
ENSG00000159423	ALDH4A1	-0.751557	0.00227743	0.0660398	0.917316	1.61925	5.31186e-10	1.8017	1.02482e-10	-0.0931619	0.828639	2.01154	1.22923e-11	2.20298	2.90114e-12	0.214884	0.48422	1.72894	3.24254e-10	1.90024	6.69291e-11	0.607005	0.0178505	0.467787	0.0359113	1.73899	7.84126e-09	-0.461297	0.0170755	0.75179	0.000337708	1.65387	3.93615e-09	-0.404968	0.0221249
ENSG00000112294	ALDH5A1	-0.427757	0.296781	-0.965544	0.094687	-1.18694	3.28763e-05	-1.54013	9.85773e-07	0.0162022	0.978342	-1.08381	0.000118513	-1.48399	1.83235e-06	0.461598	0.18453	-0.924575	0.000683033	-1.19175	4.13229e-05	0.585398	0.0757736	0.217707	0.756599	0.478791	0.290519	-0.240114	0.664051	0.140619	0.929388	-0.470306	0.27008	-0.48102	0.272922
ENSG00000119711	ALDH6A1	-0.536085	0.0589484	-0.20401	0.706756	0.450857	0.0417358	1.2866	2.94952e-07	0.519872	0.0968314	0.982473	1.63686e-05	1.61295	6.73187e-09	0.821208	0.00275043	1.45409	6.37071e-08	2.04783	1.79422e-10	1.50379	4.56687e-06	0.243893	0.484338	1.3476	8.4213e-06	0.553661	0.035022	0.282091	0.45097	0.839577	0.000582039	0.683971	0.00529238
ENSG00000164904	ALDH7A1	-0.29194	0.382341	-0.0989744	0.933952	0.333776	0.116611	0.441717	0.0341003	0.120244	0.763333	0.239	0.273017	0.401536	0.0548135	0.135598	0.667368	0.52069	0.012973	0.741396	0.00035425	0.473971	0.0606834	0.0502648	0.918984	0.366834	0.197394	-0.416738	0.193977	0.0504615	0.969729	0.702378	0.00819483	-0.0516346	0.873804
ENSG00000251400	ALDH7A1P1	-0.171704	0.840067	-0.0785727	0.943363	0.67645	0.0800005	0.608111	0.112125	0.0984624	0.894193	0.278751	0.505022	0.305574	0.453972	-0.0488436	0.94069	0.703114	0.0785199	0.829544	0.0342719	0.474948	0.330967	0.0947382	0.806886	0.504053	0.0409895	-0.289852	0.303962	0.154725	0.789668	0.535191	0.0186847	-0.239881	0.331876
ENSG00000118514	ALDH8A1	NA	NA	NA	NA	3.60212	2.34093e-06	3.1049	2.15734e-05	NA	NA	NA	NA	NA	NA	NA	NA	2.48153	6.53789e-05	1.77712	0.00216187	NA	NA	NA	NA	NA	NA	NA	NA	NA	NA	NA	NA	NA	NA
ENSG00000143149	ALDH9A1	0.261828	0.456815	-0.187061	0.222693	-0.185078	0.40252	-0.287867	0.178294	-0.297124	0.363564	-0.2167	0.322656	-0.411186	0.0489932	-0.276654	0.327013	-0.268134	0.218374	-0.212684	0.34124	-0.157943	0.596174	-0.142324	0.376277	-0.690559	4.1459e-06	-0.797331	1.37076e-06	-0.232343	0.0926004	-0.808554	2.87243e-07	-1.11317	2.04956e-08
ENSG00000149925	ALDOA	0.00197468	0.997356	-0.476147	0.509634	0.0589435	0.809834	-0.109214	0.64792	-0.318519	0.353161	0.293056	0.195282	0.41223	0.060583	-0.407456	0.150235	0.827179	0.000131217	0.964452	9.24004e-06	-0.689132	0.00731469	0.273331	0.651151	0.126681	0.7748	-0.469169	0.313641	-0.0846323	0.961241	0.787751	0.034032	-0.146234	0.740775
ENSG00000242849	ALDOAP1	NA	NA	-0.605669	0.153591	NA	NA	NA	NA	NA	NA	NA	NA	NA	NA	NA	NA	NA	NA	NA	NA	NA	NA	0.0564486	0.91852	0.516983	0.0993431	-0.556864	0.113205	-0.0239477	0.989301	0.805377	0.00572555	-0.0548043	0.876546
ENSG00000214297	ALDOAP2	NA	NA	-0.305224	0.504571	NA	NA	NA	NA	NA	NA	NA	NA	NA	NA	NA	NA	NA	NA	NA	NA	NA	NA	-0.119765	0.76731	0.0474902	0.871658	-0.859459	0.00464632	-0.184373	0.74661	0.501469	0.0389339	-0.790786	0.00440639
ENSG00000109107	ALDOC	-0.0325598	0.982031	-0.45824	0.671784	3.58787	6.20448e-08	3.40969	1.32209e-07	-0.828572	0.283546	5.1119	3.2714e-10	5.42549	1.19245e-10	-0.967997	0.142651	1.76894	0.000933849	0.463241	0.376923	-0.383678	0.607835	1.18356	0.0617502	2.07214	0.000306494	-1.04091	0.0596409	0.797477	0.231424	2.30075	3.18167e-05	-0.607116	0.221389
ENSG00000033011	ALG1	0.271274	0.489578	-0.131737	0.873628	-0.535415	0.018105	-0.335757	0.146996	-0.32337	0.363351	-0.50026	0.0282441	-0.270665	0.246946	-0.492628	0.0863631	-0.320131	0.171314	-0.326961	0.164675	-0.278417	0.353236	-0.146695	0.709316	-1.23914	7.0081e-05	-0.502532	0.0785092	-0.183975	0.740046	-1.08883	0.000121313	-0.519758	0.0432915
ENSG00000139133	ALG10	0.468603	0.349702	-0.109943	0.977075	-1.05829	0.00259107	-0.44636	0.182264	-0.171424	0.778237	-1.7582	9.36796e-06	-1.18214	0.000729108	-0.599089	0.148374	-1.42089	0.000132717	-1.25566	0.000506931	-0.163909	0.733981	-0.576263	0.548134	-0.209703	0.763141	-0.637095	0.383035	-0.482022	0.718325	-1.18902	0.0603108	-0.926415	0.150363
ENSG00000175548	ALG10B	0.0767505	0.918642	0.198078	0.963352	-1.72309	7.93536e-07	-0.858663	0.00691098	0.23772	0.66453	-2.08401	4.5204e-08	-1.20534	0.000150488	-0.161615	0.730554	-1.115	0.000584465	-0.86886	0.00741516	0.303891	0.480568	-1.18499	0.329254	-0.696801	0.410271	0.0026602	0.998138	NA	NA	NA	NA	NA	NA
ENSG00000253710	ALG11	0.0295178	0.964367	-0.254103	0.839075	0.0573419	0.826845	0.529265	0.0236581	0.192367	0.644219	0.130081	0.612492	0.403373	0.0886077	0.108369	0.771868	-0.108758	0.675692	0.0662028	0.806087	0.0789468	0.832678	-0.567697	0.365043	0.00222831	0.996623	-0.600986	0.21178	-0.415831	0.588706	-0.362457	0.391889	-0.945651	0.0323418
ENSG00000182858	ALG12	0.0756485	0.902856	-0.244865	0.767243	-1.05213	2.41756e-05	-1.26733	4.31882e-07	-0.033455	0.952519	-1.2379	8.09065e-07	-1.4434	1.07871e-08	-0.229931	0.528231	-0.878787	0.000525733	-1.1087	1.30191e-05	-0.189844	0.602625	0.0457969	0.937975	-1.79804	1.65066e-05	-0.227991	0.568294	-0.124644	0.915014	-1.4339	8.39789e-05	-0.160191	0.646111
ENSG00000101901	ALG13	-0.10321	0.853793	-0.00033924	0.999513	-1.05711	2.70317e-05	-1.28527	1.7347e-06	0.24824	0.533922	-1.1342	1.09584e-05	-1.39972	4.7205e-07	0.390765	0.210973	-0.791019	0.000916357	-1.13516	1.47011e-05	0.10019	0.787657	0.0315004	0.917439	-1.11547	2.10755e-06	-0.207492	0.28992	0.0989128	0.825208	-0.919199	1.10292e-05	-0.14821	0.399086
ENSG00000172339	ALG14	0.373328	0.427924	-0.528459	0.315227	-1.70874	6.06852e-09	-1.96946	7.20137e-11	-0.63606	0.11806	-1.7373	4.05699e-09	-1.71378	5.24861e-09	-0.685973	0.0519944	-1.43948	9.68275e-07	-1.43747	9.90591e-07	-0.513628	0.159394	0.00730029	0.991733	-1.93193	1.61161e-05	-1.09855	0.00614187	-0.273578	0.700771	-1.53077	8.68636e-05	-1.22032	0.00141106
ENSG00000253981	ALG1L13P	NA	NA	NA	NA	NA	NA	NA	NA	NA	NA	NA	NA	NA	NA	NA	NA	6.2583	1.48669e-05	5.47997	0.00010177	NA	NA	NA	NA	NA	NA	NA	NA	NA	NA	NA	NA	NA	NA
ENSG00000242017	ALG1L15P	NA	NA	-0.049895	0.988956	NA	NA	NA	NA	NA	NA	NA	NA	NA	NA	NA	NA	NA	NA	NA	NA	NA	NA	-0.278842	0.657247	-0.942533	0.0293402	-0.448713	0.342629	NA	NA	NA	NA	-0.299869	0.485497
ENSG00000119523	ALG2	-0.0108472	0.9866	-0.0573359	0.903908	0.400368	0.0678816	0.933957	1.10273e-05	0.068926	0.876071	0.645912	0.0026245	0.896585	2.31877e-05	0.0655694	0.85903	0.365981	0.0989008	0.590395	0.00649674	-0.153143	0.624693	0.0420616	0.85816	0.116768	0.428682	-0.132592	0.411088	-0.226348	0.223718	0.0452642	0.7556	-0.613806	0.000159701
ENSG00000214160	ALG3	0.340262	0.324994	-0.388822	0.742407	-0.368694	0.101915	0.0306296	0.903298	-0.222498	0.556084	-0.0918197	0.707865	0.142919	0.546038	-0.227353	0.468287	-0.179595	0.448531	-0.0669394	0.791571	-0.191163	0.536881	0.402563	0.579447	-0.986665	0.0473745	-0.368077	0.53254	-0.0932376	0.966703	-0.274746	0.562245	-0.492706	0.318574
ENSG00000120697	ALG5	0.132116	0.807326	-0.30607	0.423972	-0.891771	0.000154174	-0.631113	0.00788271	-0.221134	0.592599	-1.15236	1.13073e-06	-0.792928	0.00074926	-0.596308	0.0451331	-1.11717	2.47308e-06	-1.01295	1.94698e-05	-0.499914	0.0882136	-0.05621	0.88291	-1.01369	0.000168276	-0.177598	0.526432	-0.273032	0.463759	-0.730955	0.00156019	-0.425546	0.0633736
ENSG00000088035	ALG6	-0.173876	0.757161	-0.311477	0.434697	-0.287188	0.300243	-0.0843675	0.774387	-0.0981656	0.853383	0.0391467	0.896321	0.323304	0.237985	-0.238813	0.528773	-0.089767	0.763216	-0.12757	0.667564	0.205497	0.582186	-0.179206	0.63786	-0.188663	0.464685	-0.591179	0.0289228	-0.109852	0.881617	-0.543507	0.0257392	-0.853566	0.00153052
ENSG00000159063	ALG8	0.210784	0.635448	-0.259031	0.670769	-2.02608	8.27719e-10	-1.4033	3.59103e-07	-0.461461	0.17112	-1.63573	3.36212e-08	-1.30894	9.76046e-07	-0.563802	0.0511855	-1.65629	3.54425e-08	-1.36564	8.27658e-07	-0.449387	0.117724	-0.156572	0.713452	-1.42944	3.69044e-05	-1.24239	0.000389822	-0.412619	0.301712	-1.21487	9.12523e-05	-1.31509	0.000100954
ENSG00000086848	ALG9	0.0999974	0.847699	-0.262456	0.219962	-0.731262	0.000805246	-0.666757	0.00230478	-0.0703701	0.876056	-0.747934	0.000617225	-0.726345	0.000844435	-0.303785	0.311461	-0.811241	0.000207483	-0.746028	0.000688966	-0.324525	0.257826	0.153561	0.48596	-0.745655	4.56055e-05	-0.338831	0.0427145	-0.167944	0.50432	-0.909358	1.74125e-06	-0.384124	0.0125396
ENSG00000258529	ALG9	0.155018	0.75453	NA	NA	-0.740336	0.00118785	-0.584232	0.0110562	-0.170497	0.687177	-0.745792	0.00112846	-0.629868	0.00586758	-0.342781	0.268625	-0.767567	0.000789008	-0.698081	0.00241279	-0.357602	0.226985	NA	NA	NA	NA	NA	NA	NA	NA	NA	NA	NA	NA
ENSG00000171094	ALK	NA	NA	NA	NA	NA	NA	NA	NA	NA	NA	NA	NA	4.53374	2.95962e-05	NA	NA	5.59602	1.51173e-06	5.16581	4.86427e-06	NA	NA	NA	NA	4.09629	3.31784e-06	NA	NA	NA	NA	NA	NA	NA	NA
ENSG00000100601	ALKBH1	0.154097	0.778577	0.228713	0.357478	-0.295216	0.256678	0.410859	0.105039	-0.314488	0.432829	-0.291319	0.264873	0.243743	0.350153	-0.379673	0.25151	0.0508224	0.858114	0.220746	0.411355	-0.361244	0.263452	-0.385902	0.0736021	0.0410178	0.825647	0.164916	0.382018	-0.13881	0.668136	0.15215	0.344144	0.0285735	0.878972
ENSG00000189046	ALKBH2	-0.118648	0.830862	-0.109957	0.963491	0.446252	0.0675478	0.466915	0.0549339	-0.0734921	0.880478	0.339669	0.173954	0.458338	0.0594805	-0.00877071	0.985499	0.951336	7.13803e-05	0.900494	0.000174403	0.112352	0.764621	0.431255	0.511282	0.192497	0.685453	0.715321	0.148851	0.00648294	0.998766	1.02939	0.0133586	1.27814	0.00499694
ENSG00000166199	ALKBH3	0.175119	0.722247	-0.227567	0.390258	-0.763614	0.00119342	-0.438155	0.0688119	-0.144028	0.751389	-0.940708	6.39464e-05	-0.567481	0.0167445	-0.294928	0.369415	-0.801218	0.000694711	-0.676437	0.00445254	-0.276589	0.383799	0.0132552	0.965491	-0.346178	0.0395488	-0.287814	0.120163	-0.0548531	0.930251	-0.345515	0.025678	-0.28579	0.0813314
ENSG00000160993	ALKBH4	0.177307	0.77085	0.0874487	0.963563	-1.17004	3.53579e-05	-0.848526	0.00269692	-0.30521	0.51306	-1.19313	2.90044e-05	-1.08503	0.000124977	-0.507736	0.158879	-0.595649	0.0413272	-0.530618	0.071282	-0.205145	0.616167	0.0958825	0.874407	-0.933654	0.0143859	0.380361	0.370832	0.114049	0.936693	-0.293534	0.400616	0.559787	0.116726
ENSG00000091542	ALKBH5	0.0356113	0.948531	-0.0476745	0.959539	0.27062	0.209705	0.405663	0.0528008	-0.14649	0.703625	0.283332	0.188392	0.403002	0.0538332	-0.219104	0.454487	0.0762463	0.746606	0.278242	0.204031	-0.573663	0.0201197	0.187401	0.475745	1.02819	8.82325e-06	-0.415227	0.0409568	-0.121086	0.775594	1.09086	1.06757e-06	-0.595455	0.00229798
ENSG00000239382	ALKBH6	0.362601	0.397951	-0.352306	0.737521	-0.752195	0.00461026	-0.0594585	0.842184	-0.0196274	0.97382	-0.837336	0.00161255	-0.312155	0.258946	-0.252293	0.501986	-0.810156	0.00242162	-0.396321	0.153385	-0.0710652	0.871398	0.169632	0.805975	-1.16341	0.0109271	-0.786932	0.106818	-0.134705	0.937126	-0.260625	0.535885	-0.194773	0.678483
ENSG00000125652	ALKBH7	-0.0753883	0.909303	-0.076756	0.973685	-1.16613	0.000111722	-1.54435	3.09488e-06	-0.142199	0.789161	-1.19958	8.87436e-05	-1.4931	5.02214e-06	0.0286686	0.953964	-0.247472	0.414235	-0.290857	0.335716	0.52536	0.133421	0.143526	0.822854	-1.06696	0.0106465	0.125577	0.812476	-0.192577	0.871807	-0.367345	0.330089	0.308623	0.448802
ENSG00000137760	ALKBH8	0.165797	0.756727	0.0897809	0.917316	-0.476646	0.0602805	-0.263375	0.314838	-0.14848	0.755391	-0.385897	0.135012	-0.365503	0.154007	-0.484903	0.130033	0.227884	0.393747	0.137273	0.623468	-0.491506	0.115628	-0.38807	0.246921	0.180131	0.470101	-0.181597	0.524171	-0.413286	0.199318	-0.059883	0.813959	-0.536977	0.0279105
ENSG00000116127	ALMS1	-0.195978	0.642619	0.229724	0.819477	-0.9621	7.09001e-06	-0.635563	0.0032286	0.0072885	0.988923	-0.843845	8.61253e-05	-0.579344	0.00736571	0.0839802	0.815024	-0.817956	0.000155201	-0.651573	0.00280273	-0.207146	0.495479	-0.880908	0.0621924	-0.330825	0.372389	-0.399305	0.332669	-0.300047	0.675432	-0.76153	0.0329027	-0.361068	0.328452
ENSG00000230002	ALMS1-IT1	0.657532	0.408539	0.139799	0.966456	0.715893	0.154499	0.791429	0.109855	-0.612663	0.478006	-0.109134	0.837839	0.056251	0.916659	-0.650303	0.31393	-0.0487554	0.924577	0.0720001	0.889474	0.0777586	0.916101	-0.184556	0.858601	0.443173	0.483177	-1.59014	0.0317965	NA	NA	0.816991	0.15545	NA	NA
ENSG00000215067	ALOX12-AS1	NA	NA	-0.0171135	0.993472	NA	NA	NA	NA	NA	NA	NA	NA	NA	NA	NA	NA	NA	NA	NA	NA	NA	NA	-0.00641609	0.991243	0.794473	0.00768447	0.99331	0.00226707	0.188647	0.783215	0.776852	0.00492987	0.934732	0.00163668
ENSG00000179477	ALOX12B	NA	NA	NA	NA	6.17113	3.20073e-08	5.31929	6.31138e-07	NA	NA	8.49347	2.45418e-08	8.03808	9.01733e-08	NA	NA	2.25117	0.000102227	1.46637	0.00533259	NA	NA	NA	NA	7.75124	1.49026e-05	NA	NA	NA	NA	6.08004	1.19799e-06	NA	NA
ENSG00000161905	ALOX15	NA	NA	NA	NA	10.8533	1.49258e-10	10.003	1.01032e-09	NA	NA	10.1768	6.36509e-10	9.92926	1.02837e-09	NA	NA	5.73432	8.58916e-09	5.12332	5.30953e-08	NA	NA	NA	NA	NA	NA	NA	NA	NA	NA	NA	NA	NA	NA
ENSG00000179593	ALOX15B	NA	NA	-1.37511	0.0624828	9.70986	2.41913e-09	9.19853	6.94322e-09	NA	NA	9.61241	2.76783e-09	9.38287	3.87333e-09	NA	NA	9.00259	2.31944e-08	8.63972	5.76884e-08	NA	NA	1.59464	0.025218	0.946426	0.0922914	0.527735	0.423134	1.59202	0.0133041	1.08602	0.032689	1.4798	0.00756849
ENSG00000012779	ALOX5	NA	NA	NA	NA	8.13346	6.50451e-07	NA	NA	NA	NA	NA	NA	7.77299	1.30889e-06	NA	NA	6.9524	6.75016e-08	5.92681	7.83655e-07	NA	NA	NA	NA	NA	NA	NA	NA	NA	NA	NA	NA	NA	NA
ENSG00000132965	ALOX5AP	NA	NA	2.21384	0.00142743	NA	NA	NA	NA	NA	NA	NA	NA	NA	NA	NA	NA	2.05017	0.00469388	1.18156	0.0939527	NA	NA	2.31317	0.000624982	-0.566154	0.271225	1.68939	0.00362412	2.08917	0.00139355	NA	NA	0.773447	0.167194
ENSG00000179148	ALOXE3	NA	NA	NA	NA	3.74092	7.25219e-08	3.27805	7.08926e-07	NA	NA	3.09796	4.44202e-07	2.95967	9.09379e-07	NA	NA	1.09457	0.0137821	0.230732	0.619113	-2.46757	0.00024053	2.30517	0.0231547	2.54587	0.00299181	1.42552	0.110499	1.71405	0.0855488	2.78818	0.000520544	NA	NA
ENSG00000073331	ALPK1	-0.763454	0.00480138	-0.23575	0.76335	0.251817	0.299124	-1.776e-05	0.999933	-0.0280213	0.955855	0.765187	0.000857571	0.541228	0.0192438	0.374201	0.222867	1.77313	1.0168e-09	1.6235	5.15914e-09	1.31629	1.16914e-05	0.236905	0.618046	0.253318	0.429941	0.2199	0.563191	0.459465	0.295785	-0.302086	0.32049	0.400223	0.197144
ENSG00000198796	ALPK2	0.758029	0.0271016	0.471982	0.44821	0.611017	0.0245763	-0.113479	0.691545	0.583679	0.128567	-0.0892916	0.755408	-0.483528	0.0734566	0.370522	0.290645	-0.111757	0.698472	-0.154417	0.591103	0.58148	0.0781388	-0.894013	0.0713051	-0.70129	0.0692268	-0.959411	0.0238261	-0.559342	0.309135	-0.882914	0.0196803	-0.286225	0.471597
ENSG00000136383	ALPK3	NA	NA	-0.892377	0.571637	1.74007	0.00144798	1.39954	0.00810516	NA	NA	3.96176	6.72194e-07	NA	NA	NA	NA	1.63285	0.00202055	1.48673	0.00427377	-0.0580887	0.945686	0.848907	0.496674	1.16908	0.16047	NA	NA	1.05665	0.362366	0.0154712	0.986407	-0.111129	0.905901
ENSG00000162551	ALPL	-0.141867	0.921931	-0.488758	0.823966	4.8959	3.7417e-09	4.07032	7.51161e-08	0.718989	0.43494	4.78487	6.13588e-09	4.01871	9.28668e-08	2.22782	0.00339054	0.672806	0.174069	0.358194	0.485657	0.250939	0.729299	0.990838	0.364291	-0.112867	0.895272	-0.208759	0.837041	-0.0446321	0.991353	-0.145568	0.852154	0.361592	0.654993
ENSG00000163283	ALPP	NA	NA	NA	NA	NA	NA	NA	NA	NA	NA	5.31983	6.0063e-05	NA	NA	NA	NA	0.8813	0.224216	0.426623	0.572476	1.38774	0.122083	NA	NA	NA	NA	NA	NA	NA	NA	NA	NA	NA	NA
ENSG00000163286	ALPPL2	NA	NA	NA	NA	8.62611	0.000189131	NA	NA	NA	NA	9.38845	2.96237e-05	NA	NA	NA	NA	4.53833	1.68708e-05	3.16177	0.000624282	0.939191	0.375166	NA	NA	NA	NA	NA	NA	NA	NA	NA	NA	NA	NA
ENSG00000003393	ALS2	0.167736	0.684802	0.190193	0.883118	0.955094	3.04741e-06	0.984812	1.48468e-06	-0.17109	0.644464	0.775166	0.000156287	0.848945	3.09204e-05	-0.0982956	0.766246	1.08248	1.99823e-07	1.17739	1.85204e-08	-0.203098	0.479606	-0.332373	0.585512	1.24224	0.00396245	-0.416207	0.36436	-0.0324913	0.989067	0.557491	0.144653	-0.530534	0.187363
ENSG00000178038	ALS2CL	1.17324	0.0235365	-0.760151	0.0405039	3.48312	3.42236e-09	3.01652	4.16984e-08	0.075718	0.929213	2.49578	5.18478e-07	2.04436	9.32719e-06	0.466936	0.376386	0.742744	0.0543965	0.446555	0.25377	1.09337	0.0233414	0.493525	0.222998	0.495332	0.0948148	0.540665	0.0887101	0.271404	0.591746	-0.113586	0.697512	0.882696	0.00293274
ENSG00000155749	ALS2CR12	-0.711383	0.248107	NA	NA	1.06682	0.00916913	1.26351	0.00233468	0.740068	0.205657	1.46808	0.0008623	1.6532	0.00021789	1.08754	0.0394474	1.6432	0.000325646	1.35993	0.00214241	0.121821	0.862071	NA	NA	NA	NA	NA	NA	NA	NA	NA	NA	NA	NA
ENSG00000138380	ALS2CR8	-0.706549	0.0327003	NA	NA	0.110545	0.706819	-0.204023	0.473898	1.00059	0.00615418	0.123246	0.679407	-0.0545679	0.858867	1.33035	0.000110446	0.57353	0.0351736	0.342563	0.226792	1.61205	9.60491e-06	NA	NA	NA	NA	NA	NA	NA	NA	NA	NA	NA	NA
ENSG00000052850	ALX4	NA	NA	NA	NA	6.43377	9.96067e-10	5.98943	4.37253e-09	NA	NA	3.78377	4.56e-07	3.70223	6.0498e-07	NA	NA	2.37202	2.04316e-05	1.56051	0.00190399	0.215336	0.75848	NA	NA	NA	NA	NA	NA	NA	NA	NA	NA	NA	NA
ENSG00000183684	ALYREF	0.632111	0.0614267	0.401756	0.388526	-2.97118	2.17783e-11	-2.36822	9.24687e-10	-0.999892	0.0110439	-3.08133	1.25388e-11	-2.6273	1.40214e-10	-1.06248	0.0023845	-3.28022	7.82191e-12	-2.87546	7.32527e-11	-1.16969	0.000603736	-0.803724	0.0298843	-2.27407	3.01599e-07	-1.48799	0.000110471	-0.753848	0.0394114	-1.45474	2.27164e-05	-1.16325	0.000503279
ENSG00000242110	AMACR	0.414587	0.251725	-0.298789	0.263666	0.607638	0.0121401	0.21741	0.39816	0.421524	0.244733	0.0753191	0.781131	-0.387391	0.117524	0.0766218	0.851632	0.251572	0.329618	0.0806119	0.772848	0.408565	0.187324	0.312536	0.223673	-0.0944837	0.637835	0.614545	0.00378362	0.07759	0.89425	-0.193256	0.278643	0.43375	0.0180747
ENSG00000178522	AMBN	NA	NA	NA	NA	7.39247	5.12915e-09	6.78081	2.12414e-08	NA	NA	8.84991	4.01828e-08	8.86193	3.12942e-08	NA	NA	9.03521	5.35221e-08	8.64977	1.46252e-07	NA	NA	NA	NA	NA	NA	NA	NA	NA	NA	NA	NA	NA	NA
ENSG00000110497	AMBRA1	0.0438365	0.939686	-0.198307	0.60096	-0.00167926	0.994757	0.289556	0.202908	-0.0958464	0.828694	0.129077	0.592467	0.282563	0.213855	-0.0381973	0.922232	0.147416	0.538588	0.0781366	0.756103	-0.172924	0.581736	-0.152933	0.618139	-0.0501618	0.820504	0.667042	0.0032192	-0.0115287	0.991173	-0.255984	0.190857	0.348281	0.0754202
ENSG00000123505	AMD1	0.286886	0.397656	-0.0164792	0.996402	0.000134875	0.99944	0.198146	0.365925	-0.500662	0.0911735	0.0581381	0.804166	0.138644	0.533972	-0.655826	0.00956136	-0.316486	0.142218	-0.09085	0.700324	-0.8095	0.00078009	-0.470539	0.558973	0.745376	0.168383	-0.382502	0.550686	-0.107976	0.962735	0.351909	0.503044	-0.962113	0.0747397
ENSG00000249286	AMD1P3	NA	NA	NA	NA	NA	NA	NA	NA	NA	NA	NA	NA	NA	NA	NA	NA	NA	NA	NA	NA	NA	NA	NA	NA	0.602121	0.466934	NA	NA	NA	NA	NA	NA	NA	NA
ENSG00000139344	AMDHD1	NA	NA	NA	NA	5.33721	3.81024e-12	4.72495	3.78546e-11	NA	NA	4.82163	1.50557e-11	4.71547	2.18866e-11	NA	NA	4.74956	2.80315e-11	4.49209	7.67702e-11	NA	NA	NA	NA	5.9807	4.10384e-06	NA	NA	NA	NA	4.24902	5.40578e-06	NA	NA
ENSG00000162066	AMDHD2	0.025576	0.972577	0.11997	0.872273	-0.265922	0.327932	-0.148029	0.599691	-0.447373	0.244432	-0.813306	0.00177736	-0.619009	0.0167573	-0.448827	0.17994	0.0739406	0.801683	-0.161771	0.572727	0.0134351	0.975608	-0.699047	0.016729	-0.616766	0.0111298	0.255007	0.346566	-0.60101	0.0388461	0.135248	0.54638	0.177658	0.457627
ENSG00000184675	AMER1	-0.382208	0.391866	0.685859	0.156783	-1.155	0.000138618	-0.954406	0.0010876	0.0334074	0.95572	-0.249418	0.408947	-0.316256	0.280688	0.0936536	0.838269	-1.30433	3.87616e-05	-1.35143	2.60252e-05	-0.522807	0.134449	-0.398272	0.460901	-0.780523	0.0354684	-0.436177	0.286303	-0.229932	0.791563	-1.31862	0.000970231	-0.668398	0.0700625
ENSG00000159461	AMFR	0.0423909	0.937132	-0.178617	0.623684	-0.56562	0.00637762	-0.665772	0.00118842	0.166449	0.655323	-0.398035	0.0599063	-0.463839	0.0256444	0.198783	0.503469	-0.660171	0.00149389	-0.573285	0.00619046	0.0246052	0.944997	0.211902	0.445718	0.0714601	0.727494	0.656467	0.00217404	0.143954	0.6896	-0.0892329	0.638073	0.555088	0.00380715
ENSG00000104899	AMH	-0.147099	0.886972	NA	NA	-0.688529	0.129991	-0.343983	0.453294	-0.187131	0.828286	-0.701986	0.127347	-0.928166	0.042267	-0.085115	0.908918	-0.79243	0.0783968	-0.62318	0.168512	-0.479229	0.411057	NA	NA	NA	NA	1.61832	0.0053375	NA	NA	NA	NA	2.33499	0.000108326
ENSG00000135409	AMHR2	NA	NA	NA	NA	NA	NA	NA	NA	NA	NA	NA	NA	NA	NA	NA	NA	4.52279	1.15996e-05	NA	NA	NA	NA	NA	NA	NA	NA	NA	NA	NA	NA	NA	NA	NA	NA
ENSG00000181754	AMIGO1	-0.157427	0.820562	-0.0180003	0.995022	1.30899	6.59563e-05	0.800029	0.010081	0.490874	0.281718	1.08886	0.00059031	0.65213	0.0393353	0.268292	0.538183	0.442957	0.17262	-0.193417	0.577971	0.719471	0.0518378	-0.916185	0.0949019	1.37141	0.0013335	1.97513	7.5264e-05	0.664725	0.194281	1.39269	0.000566054	1.95553	2.6239e-05
ENSG00000139211	AMIGO2	0.839341	0.328902	-0.0251033	0.994971	-1.0224	0.0709609	-2.28404	0.000286504	0.0637073	0.956239	-1.35008	0.0194385	-2.78539	3.04796e-05	0.339793	0.676916	-2.13254	0.000651077	-2.84348	3.3841e-05	-0.611464	0.402313	-0.121043	0.885958	-1.68054	0.00254204	1.56065	0.0074214	0.429653	0.661134	-1.98178	0.000464711	-0.073469	0.901325
ENSG00000176020	AMIGO3	0.572949	0.220256	-0.132061	0.775841	-0.289166	0.372317	0.1036	0.757099	-0.668241	0.160331	-0.680638	0.0346382	-0.221322	0.491329	-1.08777	0.0101237	-0.725916	0.0249673	-0.596143	0.0652164	-0.915327	0.0229701	-0.192279	0.46736	-0.710976	0.000478401	-1.24733	3.14302e-06	-0.334599	0.157928	-0.460232	0.00840783	-1.47587	2.23716e-07
ENSG00000101935	AMMECR1	-0.0431604	0.950147	-0.109583	0.944811	-0.441061	0.108149	-0.794515	0.00477212	-0.439465	0.273439	-0.894214	0.00192714	-1.14206	0.00013983	-0.542237	0.115999	-0.786366	0.00586688	-1.15997	0.000158715	-0.900775	0.00772699	-0.561082	0.23559	-0.848837	0.0175328	-0.956155	0.0152605	-0.494088	0.336397	-0.994454	0.004116	-0.701457	0.0455551
ENSG00000144233	AMMECR1L	-0.0666929	0.897692	0.188422	0.861569	-0.454325	0.0322425	-0.506748	0.0159111	0.125077	0.757853	-0.224222	0.312718	-0.291076	0.177957	0.185163	0.549475	-0.271615	0.218098	-0.41102	0.0571416	-0.190438	0.520269	-0.252844	0.642153	-0.488714	0.174318	0.394363	0.326731	0.157873	0.883851	-0.906958	0.0116922	0.384291	0.277129
ENSG00000166126	AMN	NA	NA	NA	NA	3.74886	4.01689e-06	2.66508	0.000308594	NA	NA	3.75327	1.61799e-05	3.40347	5.76395e-05	NA	NA	NA	NA	NA	NA	NA	NA	NA	NA	1.51311	0.0147393	NA	NA	1.34383	0.067062	2.33461	0.000155917	1.51979	0.0113098
ENSG00000151743	AMN1	0.000406218	0.99937	-0.0829648	0.939743	3.00341	7.96164e-15	2.57215	1.86496e-13	0.325792	0.43718	2.56339	1.83887e-13	2.47022	4.23451e-13	0.0986598	0.817185	2.46015	6.32129e-13	2.18778	5.80788e-12	0.653821	0.0380841	0.246772	0.500637	2.38128	1.506e-08	-0.281603	0.334877	0.0296648	0.98233	2.04659	1.85351e-08	-0.542011	0.0341395
ENSG00000126016	AMOT	NA	NA	0.655048	0.529856	7.34371	2.71227e-11	7.63379	1.18026e-11	NA	NA	6.43948	4.61903e-12	6.85223	1.38288e-12	NA	NA	3.51739	3.49373e-09	3.60792	2.52385e-09	0.201534	0.74264	-0.00433719	0.997066	2.79095	6.29013e-05	-0.0216978	0.979584	1.13969	0.121714	2.89824	1.7482e-05	1.24502	0.0317067
ENSG00000166025	AMOTL1	0.163428	0.696984	0.326298	0.823022	0.765331	0.000345273	0.664394	0.00129057	0.153606	0.689663	-0.00263343	0.991239	-0.0691667	0.766269	-0.107772	0.742209	-0.0475062	0.842629	-0.03739	0.880116	-0.236755	0.398869	-0.589332	0.445515	0.776898	0.140122	-0.243696	0.710002	-0.0735568	0.979107	0.670646	0.173697	-0.630172	0.22868
ENSG00000114019	AMOTL2	0.541375	0.0472298	-0.0183806	0.994439	-0.456525	0.0343295	-0.755891	0.000457016	0.0382225	0.934177	-0.259947	0.245953	-0.278575	0.207093	0.432151	0.115999	0.481987	0.0261794	0.181138	0.438258	0.631318	0.0126212	-0.422154	0.436043	-0.242214	0.52618	0.193526	0.665404	0.0333678	0.988054	-0.129372	0.731117	0.615143	0.083248
ENSG00000116337	AMPD2	0.116219	0.812071	0.0991848	0.963491	-0.26733	0.230606	-0.180905	0.426904	-0.149433	0.709498	0.0554418	0.818742	0.152063	0.505899	-0.0561063	0.878072	0.0349647	0.887734	0.24934	0.272559	-0.152296	0.624166	-0.159722	0.811303	0.62249	0.135567	-0.5797	0.207969	0.109941	0.945292	0.152003	0.718	-1.19908	0.00657985
ENSG00000133805	AMPD3	0.428192	0.363361	1.12171	0.341483	0.878316	0.00385588	-0.0274311	0.938252	-0.132936	0.821879	0.726861	0.0181213	0.548501	0.0763043	-0.227094	0.601369	2.463	1.76413e-08	1.78634	3.34712e-06	-1.35411	0.00434401	0.0673866	0.964091	-0.0301533	0.974117	1.11855	0.202339	-0.0720722	0.988054	-1.18301	0.124305	0.369774	0.658243
ENSG00000078053	AMPH	-0.280859	0.433927	NA	NA	-0.344761	0.115184	-0.410178	0.0577845	0.159112	0.687217	-0.146065	0.530122	-0.100278	0.66771	0.262351	0.378889	0.412036	0.0600901	0.390865	0.0769317	0.138512	0.666271	0.853098	0.418732	3.31251	0.000106231	2.01583	0.0107305	1.61658	0.0662446	3.4418	2.4586e-05	NA	NA
ENSG00000145020	AMT	-1.0029	0.0389943	0.261911	0.786041	0.411312	0.268151	0.386477	0.298921	1.01899	0.0578887	0.888911	0.0188574	0.591705	0.112052	1.47717	0.00318708	0.955169	0.0152681	0.807622	0.0392538	1.81089	0.000478503	0.277611	0.618664	0.311673	0.407634	0.511096	0.205468	0.623034	0.215402	0.802904	0.0235287	1.61989	0.000107538
ENSG00000187689	AMTN	-1.32255	0.114718	NA	NA	-2.33845	0.000868352	-2.76411	0.000159928	1.18748	0.16958	0.173594	0.800261	-0.497363	0.447242	1.15666	0.141273	NA	NA	NA	NA	NA	NA	NA	NA	NA	NA	NA	NA	NA	NA	NA	NA	NA	NA
ENSG00000240038	AMY2B	-0.648681	0.0654728	-0.0852394	0.948772	0.673808	0.0138726	0.825756	0.00230732	0.917334	0.0144088	0.913458	0.000893965	0.732297	0.0078619	0.874578	0.00802711	0.778349	0.00513338	0.851457	0.00215738	0.947755	0.00323586	0.102892	0.819429	0.370654	0.190627	-0.00303692	0.994906	0.20269	0.736045	0.946589	0.00075235	0.622379	0.0240525
ENSG00000174945	AMZ1	NA	NA	0.0036503	0.999513	6.01295	1.05314e-08	4.94098	3.37662e-07	NA	NA	6.14106	1.54929e-08	5.57367	9.00556e-08	NA	NA	5.04345	2.28419e-07	3.70103	2.92316e-05	NA	NA	0.360315	0.60678	0.512339	0.27423	1.21761	0.0182529	0.14751	0.935394	0.46208	0.294587	-1.24136	0.0158809
ENSG00000196704	AMZ2	-0.00750417	0.990741	-0.131906	0.843837	0.271694	0.207669	0.398493	0.0574234	0.028545	0.950642	0.199467	0.365613	0.346988	0.0996447	0.176478	0.561455	-0.0484659	0.838512	0.0597726	0.804563	0.212016	0.4573	0.150238	0.65234	0.758915	0.00177723	0.0629991	0.83502	-0.139351	0.804739	0.585184	0.00599911	0.236625	0.290425
ENSG00000214174	AMZ2P1	-1.43466	1.1183e-06	0.311718	0.660232	-0.37033	0.152206	-0.571611	0.0235201	0.365543	0.350395	-0.0947722	0.738933	-0.260722	0.328778	0.791824	0.00997839	0.52166	0.0432935	0.301727	0.262637	0.694943	0.0220463	-0.546531	0.235937	-0.688838	0.0439829	0.338889	0.380255	-0.516078	0.288687	-1.16302	0.00118527	0.855657	0.0109573
ENSG00000153107	ANAPC1	0.210489	0.618664	0.0758815	0.986299	-1.22286	1.90761e-07	-0.603856	0.00642472	-0.442028	0.175917	-1.18086	3.33582e-07	-0.780896	0.000366786	-0.653279	0.0168671	-1.25654	1.57803e-07	-1.05447	2.51845e-06	-0.570758	0.0327691	-0.765979	0.338497	-0.132467	0.828999	-0.393777	0.555663	-0.222758	0.90374	-0.857135	0.11302	-0.510008	0.372313
ENSG00000164162	ANAPC10	0.328743	0.467446	-0.265002	0.549029	-0.663805	0.0136972	-0.0482202	0.873499	-0.293374	0.506767	-0.621453	0.02205	-0.300288	0.283556	-0.406022	0.249118	-0.37093	0.183411	-0.179441	0.543893	-0.283222	0.436529	0.402977	0.206711	0.113291	0.655921	-0.329934	0.221066	-0.0362578	0.977634	0.248468	0.256801	-0.590902	0.0149144
ENSG00000141552	ANAPC11	-0.101727	0.842147	0.0270279	0.993472	-0.234147	0.302956	-0.271004	0.226755	-0.421942	0.185729	-0.1081	0.650914	-0.0902226	0.70455	-0.227548	0.459775	0.0965324	0.690573	0.0424918	0.868242	-0.012018	0.974244	0.171878	0.807268	-0.412451	0.362254	-0.616073	0.220514	-0.041658	0.988054	0.422322	0.306443	-0.0316214	0.952494
ENSG00000129055	ANAPC13	0.201924	0.603413	-0.156843	0.748965	0.447647	0.0327792	-0.110893	0.62681	0.101316	0.806771	0.115709	0.612361	-0.301961	0.156531	0.14558	0.642393	-0.27093	0.214115	-0.28946	0.186416	0.203558	0.482426	0.251506	0.382019	-0.2986	0.144449	-0.603064	0.00846112	-0.0450593	0.958119	-0.182946	0.334272	-0.502851	0.0136089
ENSG00000110200	ANAPC15	0.411568	0.223008	-0.170421	0.939453	-0.562187	0.0149473	-0.734124	0.00129689	-0.450695	0.182332	-0.669071	0.00358495	-0.690857	0.00241613	-0.273209	0.394607	-0.441982	0.0594601	-0.362115	0.129466	-0.0666755	0.860258	-0.0687995	0.941548	-0.973973	0.0631584	-0.691649	0.238036	-0.626637	0.446488	-0.326	0.512624	-0.0118343	0.984811
ENSG00000166295	ANAPC16	-0.466108	0.12209	-0.165462	0.875493	-1.30657	4.2874e-07	-1.91464	8.36983e-10	0.160864	0.692418	-0.996806	2.37947e-05	-1.51451	4.88784e-08	0.382129	0.187733	-0.600378	0.00647333	-1.03694	1.83148e-05	0.274306	0.349392	0.542381	0.217126	-0.650616	0.0479846	0.243522	0.537934	0.105459	0.931931	-0.205379	0.508787	0.274847	0.404824
ENSG00000233673	ANAPC1P1	0.320065	0.79233	NA	NA	NA	NA	NA	NA	NA	NA	-1.08643	0.0809122	-0.600727	0.304616	-0.382437	0.636341	-1.70811	0.00615152	-1.17881	0.0415449	-1.04904	0.138057	NA	NA	NA	NA	NA	NA	NA	NA	NA	NA	NA	NA
ENSG00000176248	ANAPC2	0.0669596	0.906115	-0.0787144	0.950351	-0.594561	0.0120719	0.134932	0.578133	-0.107781	0.816194	-0.248224	0.293913	0.393759	0.0905116	-0.069189	0.860009	-0.092727	0.709718	0.139759	0.571279	-0.0364028	0.927021	0.194101	0.622051	-0.190677	0.48177	-0.0933892	0.787078	0.0567642	0.95998	0.435579	0.0692787	0.200971	0.452098
ENSG00000053900	ANAPC4	-0.050605	0.929244	0.0426147	0.958797	-0.284963	0.216703	-0.186892	0.428745	-0.0430567	0.929554	-0.340729	0.136938	-0.240768	0.298902	-0.0784047	0.833537	-0.371961	0.102999	-0.326911	0.157932	-0.0525801	0.887936	-0.220357	0.364163	0.0496016	0.78811	-0.0657917	0.758646	0.108562	0.769927	-0.000807476	0.996726	-0.046017	0.805774
ENSG00000089053	ANAPC5	-0.0359849	0.94831	-0.0587864	0.875493	0.11772	0.607359	0.295782	0.168033	0.235637	0.496552	0.0676883	0.771424	0.225882	0.299398	0.0739699	0.831821	-0.270395	0.216471	-0.223315	0.317777	-0.0576586	0.867244	-0.25257	0.0986947	-0.552199	9.39554e-05	-0.620329	6.0018e-05	-0.261389	0.0737015	-0.500525	0.00012715	-0.676814	9.55054e-06
ENSG00000196510	ANAPC7	0.0822335	0.86726	-0.17245	0.682306	-0.621782	0.00271603	-0.549596	0.00817104	-0.497255	0.0947513	-0.484812	0.0210698	-0.530377	0.0106029	-0.44457	0.0949315	-0.389048	0.0689673	-0.40966	0.0559763	-0.408359	0.118307	-0.09437	0.746308	-0.777982	0.000347337	-0.853871	0.00031986	-0.100113	0.848942	-0.532079	0.00423268	-0.729004	0.000567532
ENSG00000214274	ANG	-0.931746	0.00441563	-0.498221	0.177153	-0.997151	0.000420182	-0.88313	0.00174822	0.370588	0.404819	0.171264	0.589058	0.154398	0.621884	0.999975	0.00317662	0.0280065	0.933303	0.278278	0.365617	0.608601	0.0805797	0.0418924	0.929023	-0.496551	0.064073	0.112832	0.742251	-0.35233	0.372284	-0.0522532	0.845674	0.645491	0.0140031
ENSG00000013523	ANGEL1	-0.11689	0.829644	0.153488	0.890815	-0.62133	0.00834971	-0.156027	0.539991	0.488244	0.15198	-0.0668459	0.801538	0.20187	0.418224	0.462089	0.126557	-0.295066	0.231181	-0.16423	0.526799	0.352042	0.247883	0.0306046	0.963012	0.163782	0.652562	0.209995	0.609918	0.332011	0.569	-0.331403	0.320722	0.180525	0.619511
ENSG00000174606	ANGEL2	-0.0570241	0.922121	-0.0479532	0.977075	-1.39325	2.3533e-09	-1.54145	6.51035e-11	0.0797771	0.867999	-1.56472	4.48362e-11	-1.69089	1.15842e-11	0.101096	0.788465	-1.15496	7.59369e-07	-1.41662	2.17064e-09	0.329062	0.279127	-0.298148	0.471359	-1.21226	0.000180168	0.398375	0.189602	-0.065824	0.952789	-1.65517	4.52818e-06	0.15807	0.587774
ENSG00000154188	ANGPT1	0.140746	0.894664	-1.72393	0.15751	1.29657	0.00609337	0.658711	0.148995	0.981134	0.13298	1.15071	0.0139373	0.386273	0.40417	0.630908	0.286429	4.07472	1.93448e-06	3.82852	5.80781e-06	NA	NA	-0.83759	0.520995	-1.26583	0.151523	-0.583494	0.575421	-0.0616025	0.989453	-2.56946	0.0056974	-0.485905	0.595406
ENSG00000091879	ANGPT2	NA	NA	0.62833	0.723843	NA	NA	NA	NA	NA	NA	NA	NA	NA	NA	NA	NA	NA	NA	NA	NA	NA	NA	-0.281524	0.82099	-3.62444	0.000371754	0.905536	0.29389	0.52714	0.758483	-1.49579	0.0623799	2.42873	0.00268296
ENSG00000116194	ANGPTL1	-2.71363	0.0049385	-2.3438	0.000320464	-4.68861	3.4917e-05	-4.54814	2.65023e-05	0.369688	0.739333	NA	NA	NA	NA	NA	NA	NA	NA	NA	NA	NA	NA	0.329688	0.652309	-4.52749	1.02927e-06	0.0121987	0.986337	0.0243466	0.992537	-4.13271	1.48972e-07	-0.661439	0.142745
ENSG00000136859	ANGPTL2	-1.28345	0.0342049	-0.0735802	0.982625	2.16218	4.14579e-06	1.22194	0.00332947	1.36387	0.0223109	NA	NA	1.46193	0.00217773	NA	NA	-1.00053	0.00667017	-0.882365	0.0155079	-0.162932	0.752862	0.726551	0.284561	0.12167	0.817912	2.92161	2.25122e-05	1.16009	0.0430212	0.323633	0.488968	2.32353	5.80085e-05
ENSG00000167772	ANGPTL4	0.204481	0.900006	-1.58805	0.0249423	2.97735	0.000112079	2.18075	0.00224711	0.341538	0.794295	3.69614	8.81014e-06	3.42838	1.94096e-05	-0.265916	0.806621	-1.16066	0.0728821	-1.62429	0.0149372	-4.02743	7.50747e-05	-0.613922	0.434826	-0.147434	0.802128	-2.48465	0.000343237	-0.745589	0.343124	2.14737	0.000180908	-2.48083	0.000189054
ENSG00000187151	ANGPTL5	0.782821	0.312346	NA	NA	-1.80967	0.00473265	-5.40356	5.86253e-07	-1.00021	0.219195	-3.08889	2.33151e-05	-4.47007	4.6781e-07	-0.132449	0.868868	NA	NA	NA	NA	NA	NA	NA	NA	NA	NA	NA	NA	NA	NA	NA	NA	NA	NA
ENSG00000130812	ANGPTL6	NA	NA	NA	NA	5.08919	1.50391e-08	5.06613	1.50904e-08	NA	NA	7.25304	5.17602e-09	7.33439	3.64411e-09	NA	NA	4.94065	2.13669e-08	4.5383	8.60457e-08	NA	NA	1.18705	0.0260743	0.749185	0.080363	NA	NA	0.429529	0.51199	0.818809	0.0252912	0.454662	0.24094
ENSG00000029534	ANK1	0.245463	0.839998	-0.105477	0.965251	-2.65383	3.90791e-05	-3.41248	1.78552e-06	0.159685	0.879795	-2.14445	0.000415514	-3.87169	3.24619e-07	0.28636	0.721611	-1.54231	0.00741411	-2.46277	0.000121873	1.12029	0.0990309	0.127687	0.86966	0.673299	0.143916	0.945633	0.0560643	-0.142989	0.936693	0.742163	0.0845105	1.02464	0.0226271
ENSG00000145362	ANK2	-0.672985	0.145089	-0.264491	0.960271	-1.33624	0.000277878	-1.85734	4.93752e-06	0.00952752	0.989882	-0.423529	0.213314	-1.20442	0.000858139	0.0589261	0.915882	0.738081	0.0334839	0.242856	0.49967	0.249027	0.59419	-0.25895	0.883291	0.0230483	0.985528	-0.712039	0.577327	0.693478	0.762149	-0.292785	0.786313	-0.595793	0.59596
ENSG00000151150	ANK3	-0.320706	0.581221	-0.455471	0.737521	1.26385	0.000348751	0.517595	0.115704	1.44384	0.00475523	2.77662	5.48999e-09	1.94663	1.52251e-06	1.38307	0.00191283	2.58704	4.51925e-08	1.81057	9.94051e-06	1.13044	0.00910067	-0.275425	0.754852	1.04689	0.0681019	0.374361	0.589677	-0.0281587	0.993506	-0.202529	0.722744	0.0521079	0.939167
ENSG00000151687	ANKAR	-0.377918	0.555597	-0.245238	0.751228	-0.998181	0.00959869	-1.56649	0.000187977	0.795163	0.129233	-0.658583	0.0840048	-0.965841	0.0127481	0.645946	0.168069	-0.117304	0.772824	-0.786266	0.0418593	0.941468	0.037995	0.168342	0.730126	-0.684861	0.0399994	0.74268	0.0323491	0.0787589	0.952739	-0.519683	0.0931285	0.805411	0.0106515
ENSG00000166839	ANKDD1A	-0.66574	0.0845711	0.0291389	0.988956	1.3044	1.63598e-05	1.222	4.73152e-05	0.429594	0.338333	2.03357	2.36554e-08	2.25929	4.65518e-09	0.785734	0.0281166	1.86479	1.36193e-07	2.00135	4.8672e-08	0.455787	0.237554	0.691576	0.0228621	0.967066	0.00034906	0.109509	0.718921	0.83904	0.00279404	1.15228	2.31811e-05	0.149691	0.552048
ENSG00000189045	ANKDD1B	NA	NA	NA	NA	NA	NA	NA	NA	0.559584	0.432829	NA	NA	NA	NA	NA	NA	NA	NA	NA	NA	NA	NA	NA	NA	NA	NA	NA	NA	NA	NA	NA	NA	NA	NA
ENSG00000132623	ANKEF1	NA	NA	-0.463137	0.69073	NA	NA	NA	NA	NA	NA	NA	NA	NA	NA	NA	NA	4.28333	3.07087e-06	4.14111	4.38575e-06	NA	NA	-0.498367	0.537292	1.12952	0.0360773	-0.393036	0.535662	-0.187748	0.921835	0.05493	0.922041	-0.123668	0.834367
ENSG00000153930	ANKFN1	5.7612	5.17465e-09	NA	NA	NA	NA	NA	NA	NA	NA	-0.783002	0.0807873	-1.43996	0.00232453	-0.159293	0.80177	NA	NA	NA	NA	NA	NA	NA	NA	NA	NA	NA	NA	NA	NA	NA	NA	NA	NA
ENSG00000185722	ANKFY1	-0.0832645	0.865646	0.0509505	0.987409	-0.443504	0.0346877	-0.226616	0.297598	0.0314733	0.944946	-0.333903	0.118921	-0.219002	0.314237	0.262205	0.359519	-0.311925	0.149773	-0.290108	0.18546	0.17282	0.554966	-0.618437	0.27938	-0.170554	0.695157	-0.212091	0.671991	-0.153789	0.912585	-0.497786	0.204774	-0.593817	0.14249
ENSG00000154122	ANKH	-2.08154	2.13147e-10	-0.464474	0.0635794	-0.85577	5.64551e-05	-1.27863	1.53547e-07	0.182235	0.61677	0.356413	0.0942963	-0.0921192	0.686205	0.669411	0.00802711	0.0116167	0.961813	-0.161602	0.478959	0.592119	0.0163142	0.478509	0.0659171	0.64614	0.0026612	0.0316428	0.906102	0.43264	0.0637155	0.198185	0.301664	-0.449263	0.0232193
ENSG00000131503	ANKHD1	-0.170722	0.680945	-0.148183	0.750182	0.502051	0.0167194	0.76456	0.000207533	0.24805	0.470792	0.583087	0.00524424	0.728325	0.000400463	0.157711	0.613765	0.264566	0.228622	0.414696	0.0534559	0.0310041	0.931486	-0.0423499	0.890081	0.564198	0.00400485	0.668162	0.00263068	-0.113317	0.813958	0.452853	0.00900284	0.930034	3.71249e-05
ENSG00000254996	ANKHD1-EIF4EBP3	-0.17645	0.668144	-0.155157	0.734624	0.498661	0.0174356	0.76194	0.000216681	0.252819	0.460309	0.588311	0.00480874	0.734008	0.000356563	0.168088	0.588804	0.27362	0.211643	0.421652	0.0491992	0.03983	0.910797	-0.0429232	0.888465	0.559277	0.00434804	0.684519	0.00219	-0.111952	0.81908	0.435855	0.0116849	0.946675	3.10298e-05
ENSG00000001629	ANKIB1	-0.195797	0.616499	0.0994841	0.990363	0.195304	0.375059	0.279938	0.1909	0.236357	0.491371	0.321745	0.132722	0.392143	0.0610655	0.341812	0.210416	0.151799	0.502974	0.397691	0.0625538	0.153396	0.606557	-0.625818	0.668325	1.22248	0.21111	0.149128	0.910297	0.192783	0.963094	0.13183	0.895153	-0.0777584	0.946486
ENSG00000160117	ANKLE1	0.0878144	0.937036	0.634068	0.427108	1.14861	0.0110657	0.805519	0.0672138	-0.483863	0.522756	0.620374	0.168192	0.8098	0.0642428	-0.303177	0.638837	-0.673469	0.166671	-0.377953	0.439543	-0.59994	0.330967	-0.821093	0.240177	-0.967993	0.057694	-0.134064	0.830363	NA	NA	NA	NA	NA	NA
ENSG00000176915	ANKLE2	0.288048	0.391426	-0.050333	0.956461	-0.614141	0.00291585	-0.659526	0.00131191	-0.210381	0.551224	-0.640993	0.00187057	-0.822425	5.38821e-05	-0.294204	0.291814	-1.14201	4.3388e-08	-1.32032	1.10012e-09	-0.6876	0.00447918	-0.195763	0.501035	-0.598581	0.00363266	0.849913	0.000259649	-0.0873636	0.874847	-0.731626	0.000501338	0.57915	0.00348039
ENSG00000144504	ANKMY1	-0.163585	0.788298	0.138498	0.788897	-1.98291	1.3236e-10	-1.52779	3.98812e-08	0.385615	0.369603	-1.53271	5.85364e-08	-1.34878	1.27035e-06	0.485725	0.170036	-1.50116	1.18554e-07	-1.69999	3.88195e-09	0.233483	0.548777	-0.22038	0.456305	-0.619295	0.0038695	0.873823	0.000345507	-0.182266	0.630344	-0.60846	0.00308392	0.931795	6.72802e-05
ENSG00000106524	ANKMY2	0.339262	0.317808	0.376151	0.422991	0.819478	0.000130613	0.813287	0.000147698	0.279213	0.429007	0.345495	0.122194	0.247657	0.273658	-0.0884757	0.803921	0.393999	0.0769657	0.369532	0.100065	-0.0531573	0.884637	-0.56191	0.160532	0.181378	0.558685	-0.846726	0.010409	-0.202967	0.755352	0.18354	0.53536	-0.482166	0.103591
ENSG00000164331	ANKRA2	-0.366665	0.337484	0.301126	0.634971	-0.149419	0.571348	-0.134746	0.611995	0.487568	0.166761	-0.0260002	0.925047	-0.0293355	0.918184	0.774956	0.00869851	0.607513	0.012467	0.407957	0.102025	1.0463	0.000180934	-0.163153	0.739815	-0.337388	0.294252	0.491121	0.157333	-0.0217074	0.990044	-0.737497	0.0198862	0.38695	0.217164
ENSG00000148677	ANKRD1	1.24336	0.0186148	-1.52299	0.00152559	2.07086	1.86526e-05	1.85792	6.57082e-05	0.0553176	0.949551	1.78305	0.000120399	1.66281	0.000219179	-0.118097	0.859871	1.0574	0.0126349	0.683126	0.10209	0.597413	0.249296	0.294455	0.580831	-0.0595592	0.882859	-0.0109942	0.983888	0.19755	0.835415	-0.224461	0.514657	0.5828	0.0925902
ENSG00000088448	ANKRD10	-0.57692	0.0263159	0.576534	0.0400406	-0.351391	0.100412	-0.567315	0.00637786	0.679119	0.0201389	0.12179	0.596096	-0.0827626	0.720332	1.06204	5.81443e-05	0.107176	0.646623	-0.0205839	0.933483	0.454119	0.0789413	0.043423	0.91044	0.0166142	0.947122	1.17434	5.24632e-05	0.05338	0.952789	0.0603741	0.792455	1.29047	6.29073e-06
ENSG00000229152	ANKRD10-IT1	-0.43005	0.458317	NA	NA	0.147749	0.692938	-0.12427	0.741427	0.993406	0.0494082	0.49179	0.169966	0.244628	0.502601	1.40926	0.00265111	-0.0294363	0.942023	-0.0621872	0.879566	0.833852	0.056474	NA	NA	NA	NA	0.567067	0.336261	NA	NA	NA	NA	NA	NA
ENSG00000167522	ANKRD11	-0.232747	0.531387	-0.134166	0.92762	-0.147083	0.516514	-0.678849	0.00103127	-0.342336	0.281123	0.187877	0.401486	-0.0747521	0.748227	-0.101699	0.759705	-0.00439307	0.985502	-0.131283	0.573735	-0.0908477	0.781443	-0.510134	0.331536	-0.729916	0.0535579	0.0238452	0.965409	-0.607805	0.240816	-0.147518	0.687428	0.348919	0.348767
ENSG00000101745	ANKRD12	-0.339606	0.287618	-0.39574	0.762588	0.574002	0.00784668	-0.0324673	0.891372	0.36774	0.239373	0.307956	0.153686	-0.148204	0.506514	0.58892	0.0260108	0.473382	0.028017	0.0893555	0.706542	0.337192	0.209207	-0.0536977	0.956397	-0.11946	0.835514	0.0572186	0.9391	-0.817886	0.270921	0.370777	0.452799	0.327488	0.546529
ENSG00000076513	ANKRD13A	0.201739	0.613815	0.1048	0.985335	0.273422	0.212647	0.657287	0.0016227	0.164956	0.668802	-0.033283	0.889776	0.171192	0.444441	0.119529	0.715206	-1.00684	1.75583e-06	-0.738498	0.000460473	-0.681668	0.00619868	-0.892778	0.416839	0.649935	0.394425	0.374898	0.687769	-0.330915	0.887399	0.0280146	0.972884	0.685615	0.360011
ENSG00000198720	ANKRD13B	-0.713692	0.0181947	0.499792	0.314334	0.65975	0.00736444	0.883623	0.000285444	0.422143	0.252134	1.1818	2.2795e-06	1.35259	3.28575e-07	0.811045	0.00704056	0.583042	0.0197188	0.837901	0.000696286	0.177322	0.620263	0.559605	0.207862	0.963928	0.0053544	1.09377	0.00410559	0.614125	0.150158	1.77163	4.61788e-06	1.32343	0.000295922
ENSG00000118454	ANKRD13C	0.173311	0.691913	-0.0483961	0.989091	-0.0378725	0.877796	-0.0654058	0.788605	-0.0352313	0.940421	-0.273567	0.228249	-0.317819	0.153869	-0.0534113	0.886624	-0.280514	0.217757	-0.161912	0.498674	-0.100563	0.767763	-0.424721	0.494794	0.473739	0.25888	-0.175226	0.738501	-0.0715779	0.969729	-0.153513	0.717029	-0.378759	0.369194
ENSG00000172932	ANKRD13D	0.0952417	0.864516	-0.134204	0.873803	-0.599605	0.0106658	-0.537043	0.0224826	-0.177232	0.678869	-0.608086	0.00984925	-0.591132	0.0114819	0.0338631	0.936652	-0.632022	0.00712563	-0.694298	0.00308908	-0.025081	0.949936	-0.0613141	0.887661	-0.533493	0.0452024	-0.110517	0.745568	-0.258332	0.586664	-0.0352566	0.895026	0.192532	0.472026
ENSG00000134461	ANKRD16	-0.0458408	0.955489	-0.174327	0.830145	-0.917759	0.00335415	-0.17496	0.606934	0.0120726	0.986375	-0.73129	0.0216814	-0.20976	0.532338	-0.0911439	0.856517	-0.0203823	0.954813	-0.265121	0.434278	0.0776271	0.879076	-0.251203	0.542362	-1.31546	9.16505e-05	-0.515614	0.0983787	-0.439453	0.265416	-0.960173	0.000927787	-0.269553	0.341058
ENSG00000132466	ANKRD17	0.0981864	0.842074	-0.191978	0.651755	0.313514	0.145728	0.245316	0.260249	0.144054	0.712904	0.0321057	0.89277	-0.0482222	0.83884	0.0106195	0.978776	0.273919	0.211884	0.149495	0.519084	0.0444231	0.899519	-0.269371	0.353841	-0.0446788	0.842773	0.129409	0.603062	-0.109175	0.84612	-0.269752	0.162867	0.202903	0.32216
ENSG00000180071	ANKRD18A	4.06606	2.14677e-05	NA	NA	4.96796	1.25556e-07	4.24474	1.46307e-06	NA	NA	1.35943	0.0126739	1.24747	0.0201073	-0.559954	0.4266	NA	NA	NA	NA	NA	NA	NA	NA	NA	NA	NA	NA	NA	NA	NA	NA	NA	NA
ENSG00000230453	ANKRD18B	8.15211	5.42704e-10	2.77112	0.00152687	NA	NA	NA	NA	NA	NA	-1.17596	0.00998348	-1.86044	0.000178024	-0.931619	0.0821393	NA	NA	0.121417	0.829795	NA	NA	-0.471155	0.625785	-1.97596	0.00506639	-0.725834	0.323435	0.330739	0.87649	0.197431	0.783618	0.576708	0.421373
ENSG00000165887	ANKRD2	0.505901	0.623217	NA	NA	1.12159	0.0441886	-0.0228282	0.97149	0.253612	0.816442	1.26143	0.0204474	-0.0158087	0.979606	0.409367	0.595078	1.68499	0.00270913	0.514344	0.354689	0.0791631	0.930524	NA	NA	NA	NA	NA	NA	NA	NA	NA	NA	NA	NA
ENSG00000196593	ANKRD20A19P	NA	NA	NA	NA	10.821	1.24456e-07	10.2271	4.37439e-07	NA	NA	8.48186	1.20563e-07	7.7921	4.93244e-07	NA	NA	8.04217	1.00755e-07	6.43088	3.56868e-06	NA	NA	NA	NA	NA	NA	NA	NA	NA	NA	NA	NA	NA	NA
ENSG00000172014	ANKRD20A4	NA	NA	NA	NA	NA	NA	0.766649	0.251498	NA	NA	NA	NA	NA	NA	NA	NA	NA	NA	NA	NA	NA	NA	NA	NA	NA	NA	NA	NA	NA	NA	NA	NA	NA	NA
ENSG00000186481	ANKRD20A5P	1.84388	1.30724e-05	NA	NA	2.37925	1.55024e-08	1.58055	1.38136e-05	0.744137	0.123726	1.68071	1.20495e-06	0.643207	0.0338	0.925144	0.011094	1.84671	2.28018e-07	1.53806	3.80243e-06	1.21263	0.00078009	NA	NA	NA	NA	NA	NA	NA	NA	NA	NA	NA	NA
ENSG00000236816	ANKRD20A7P	NA	NA	NA	NA	NA	NA	NA	NA	NA	NA	NA	NA	NA	NA	NA	NA	0.617955	0.392301	-0.290232	0.701378	0.174791	0.867177	NA	NA	NA	NA	NA	NA	NA	NA	NA	NA	NA	NA
ENSG00000206192	ANKRD20A9P	NA	NA	NA	NA	NA	NA	NA	NA	NA	NA	NA	NA	NA	NA	NA	NA	3.62654	0.000184737	NA	NA	NA	NA	NA	NA	NA	NA	NA	NA	NA	NA	NA	NA	NA	NA
ENSG00000152766	ANKRD22	NA	NA	NA	NA	7.85241	3.58255e-05	NA	NA	NA	NA	NA	NA	NA	NA	NA	NA	NA	NA	NA	NA	NA	NA	NA	NA	3.88457	0.00013595	NA	NA	NA	NA	5.81903	1.1092e-06	NA	NA
ENSG00000163126	ANKRD23	-0.0345035	0.968817	-0.201614	0.882348	-0.340104	0.303411	-0.0264011	0.941358	-0.0162438	0.980706	-0.204362	0.553834	0.11618	0.739565	-0.0746473	0.883535	-0.456346	0.162117	-0.252812	0.459103	-0.0329824	0.949773	-0.119955	0.8617	-0.469615	0.268196	-0.302094	0.549785	-0.325227	0.710207	0.376923	0.331136	0.400793	0.330017
ENSG00000089847	ANKRD24	-0.75884	0.178923	NA	NA	5.49304	3.00413e-14	5.4945	3.53235e-14	1.91106	0.00167456	5.69918	3.5454e-14	5.82124	2.50374e-14	2.34191	3.14017e-05	5.09894	3.03928e-13	5.04987	4.42783e-13	2.41898	1.13818e-05	NA	NA	3.36295	2.48045e-07	1.51807	0.00306103	1.25544	0.0170479	3.78177	8.48463e-09	2.44699	7.86178e-06
ENSG00000107890	ANKRD26	0.109502	0.83407	-0.331208	0.79495	-0.00227656	0.993015	0.372585	0.102409	0.0617604	0.894171	-0.33284	0.150937	0.0191892	0.941872	-0.205189	0.528309	-0.148086	0.544723	0.0573383	0.826523	0.107479	0.756701	0.336184	0.637601	-0.356683	0.465995	0.347954	0.547077	-0.170731	0.92264	0.140815	0.766214	0.441754	0.354226
ENSG00000261239	ANKRD26P1	NA	NA	NA	NA	4.64127	8.72811e-05	NA	NA	NA	NA	NA	NA	NA	NA	NA	NA	1.71879	0.0366671	NA	NA	NA	NA	NA	NA	2.20351	0.000237112	NA	NA	NA	NA	NA	NA	NA	NA
ENSG00000105186	ANKRD27	0.156299	0.72145	0.512839	0.0360253	0.354578	0.0992556	0.663101	0.00142015	0.00601448	0.990654	0.437423	0.0400734	0.512873	0.0143144	0.0554326	0.877383	0.0348565	0.88648	0.0773384	0.748567	-0.125195	0.694337	-0.118429	0.692963	0.51669	0.011676	-0.0206482	0.941108	0.0499934	0.94957	0.372385	0.049808	-0.135868	0.511586
ENSG00000206560	ANKRD28	0.15001	0.72883	0.0955689	0.968703	-0.921224	9.34973e-05	-0.785338	0.000552614	0.287579	0.381433	-1.09224	1.01814e-05	-1.06926	1.29022e-05	0.601777	0.0251503	-1.04429	2.41518e-05	-1.08607	1.51664e-05	-0.315252	0.238774	-0.567911	0.404848	-1.09253	0.023663	1.06832	0.0386329	0.169207	0.919942	-1.85987	0.000409046	0.94363	0.0407746
ENSG00000154065	ANKRD29	NA	NA	NA	NA	NA	NA	NA	NA	NA	NA	NA	NA	NA	NA	NA	NA	3.42407	7.47809e-09	2.73621	1.63328e-07	0.708094	0.143834	1.94197	0.0243457	2.21065	0.00241707	1.52826	0.0381021	1.94587	0.0128862	2.47208	0.00037893	1.49193	0.0243994
ENSG00000180777	ANKRD30B	1.85501	0.00539863	NA	NA	-1.55614	0.00564926	-1.81492	0.00162399	-0.049697	0.965481	-1.43267	0.00797973	-2.40479	6.59868e-05	-0.123375	0.881978	-0.450994	0.395911	-1.83272	0.00124957	-0.631767	0.339653	NA	NA	NA	NA	NA	NA	NA	NA	NA	NA	NA	NA
ENSG00000175302	ANKRD30BP1	3.17512	3.51221e-05	NA	NA	NA	NA	NA	NA	NA	NA	-0.462651	0.367429	-0.709851	0.158343	0.224107	0.757152	-0.51464	0.309052	-1.48956	0.00486761	-0.799207	0.191738	NA	NA	NA	NA	NA	NA	NA	NA	NA	NA	NA	NA
ENSG00000224309	ANKRD30BP2	-1.00776	0.155538	NA	NA	NA	NA	NA	NA	-0.148342	0.877217	-2.19442	0.00152532	-2.73258	0.000186402	-0.217236	0.793493	-1.28519	0.0146651	-1.62875	0.00271432	-0.314237	0.64117	NA	NA	NA	NA	NA	NA	NA	NA	NA	NA	NA	NA
ENSG00000145700	ANKRD31	NA	NA	NA	NA	2.13697	1.30594e-05	2.12778	1.3693e-05	NA	NA	2.77996	1.03209e-06	2.44488	7.49048e-06	1.4595	0.0206505	2.92455	9.18094e-08	2.08143	1.43539e-05	0.97775	0.0571166	NA	NA	NA	NA	NA	NA	NA	NA	NA	NA	NA	NA
ENSG00000133302	ANKRD32	0.62918	0.0894824	NA	NA	-1.83627	3.84028e-07	-0.601064	0.0322078	-0.497009	0.225023	-2.30063	9.84464e-09	-1.42959	1.0485e-05	-0.748544	0.0345276	-1.62278	2.71289e-06	-1.2371	9.64023e-05	-0.579462	0.0899878	NA	NA	NA	NA	NA	NA	NA	NA	NA	NA	NA	NA
ENSG00000167612	ANKRD33	NA	NA	NA	NA	NA	NA	NA	NA	NA	NA	NA	NA	NA	NA	NA	NA	NA	NA	NA	NA	NA	NA	NA	NA	2.27126	0.000728338	NA	NA	NA	NA	3.13085	6.74212e-06	NA	NA
ENSG00000164236	ANKRD33B	0.808028	0.242803	NA	NA	2.47624	6.49761e-06	1.38636	0.00392233	-0.4658	0.565966	2.14026	3.70744e-05	1.95588	0.000105079	0.168872	0.815024	2.18656	2.96901e-05	2.19987	3.0107e-05	0.557518	0.342892	NA	NA	1.56168	0.122931	NA	NA	NA	NA	NA	NA	NA	NA
ENSG00000181039	ANKRD34A	0.331619	0.527403	NA	NA	0.987522	0.00188983	1.01233	0.00154286	-0.291361	0.570231	1.18571	0.000307715	0.988562	0.00181574	-0.418271	0.297196	1.69568	6.21011e-06	1.77109	3.70035e-06	0.283186	0.516112	NA	NA	NA	NA	NA	NA	NA	NA	NA	NA	NA	NA
ENSG00000189127	ANKRD34B	NA	NA	NA	NA	10.5749	5.25968e-10	9.99659	1.41654e-09	NA	NA	10.2449	9.03554e-10	9.96785	1.35443e-09	NA	NA	8.62095	5.04697e-08	NA	NA	NA	NA	NA	NA	7.0129	4.73874e-06	NA	NA	NA	NA	NA	NA	NA	NA
ENSG00000198483	ANKRD35	NA	NA	-1.19803	0.00770103	5.49827	1.56234e-06	7.48802	6.86393e-09	NA	NA	6.74927	5.2777e-07	8.45956	5.66578e-09	NA	NA	4.51106	5.98205e-06	5.05041	1.17076e-06	NA	NA	0.353663	0.483711	0.682097	0.0495495	-0.43277	0.276508	-0.952724	0.0246922	0.275488	0.388347	-1.58509	0.000139671
ENSG00000135976	ANKRD36	-0.0578292	0.930919	-0.0681486	0.990363	-0.13743	0.631182	-0.179848	0.523483	0.462559	0.228849	-0.522254	0.0502795	-0.386043	0.150859	0.119579	0.772609	-0.152845	0.595524	-0.3177	0.250312	0.362551	0.285935	-0.779522	0.406935	-0.958716	0.142602	-0.346676	0.665326	-1.23595	0.169145	-0.449493	0.475454	0.719796	0.253816
ENSG00000196912	ANKRD36B	0.0659195	0.932114	0.313718	0.790747	-0.153734	0.65404	-0.411941	0.20195	0.408696	0.389275	-0.235169	0.487867	-0.570474	0.0734077	0.153758	0.740415	-0.220777	0.517442	-0.475132	0.145394	0.0992104	0.841218	-0.597461	0.355824	-0.736377	0.106323	-0.358326	0.503636	NA	NA	NA	NA	0.765301	0.0836198
ENSG00000174501	ANKRD36C	-0.0987045	0.87458	0.41143	0.837262	0.489282	0.0686151	0.352015	0.198052	0.670894	0.0704829	0.18951	0.511455	0.116012	0.691519	0.402299	0.250464	0.15996	0.583141	0.117792	0.693954	0.533831	0.103078	-0.587185	0.56529	-0.805479	0.247242	-0.256233	0.772965	-0.685425	0.601732	0.19481	0.781075	1.15196	0.0849125
ENSG00000186352	ANKRD37	-0.58989	0.0731884	-0.337567	0.773904	0.805379	0.00217356	-0.102982	0.705142	0.340704	0.375591	1.19992	2.99565e-05	0.526415	0.036639	0.70559	0.0270835	0.614855	0.0163927	0.460223	0.0698421	0.454384	0.1396	0.173689	0.815027	0.932385	0.0467239	-1.64213	0.00324202	0.0433986	0.988054	1.90701	0.000115686	-1.77296	0.00103963
ENSG00000213337	ANKRD39	0.272999	0.585078	-0.212249	0.885621	-0.69343	0.012554	-0.279786	0.334491	-0.252561	0.593282	-0.745883	0.00752097	-0.371218	0.194206	-0.336345	0.36907	-0.856689	0.00199441	-0.740809	0.00784705	-0.212998	0.586866	0.0869997	0.909965	-0.585248	0.193366	-0.476704	0.356126	-0.244877	0.840037	0.352806	0.399022	0.111775	0.821291
ENSG00000154945	ANKRD40	0.345497	0.276734	-0.212289	0.645755	-0.970187	2.48291e-06	-1.23161	3.10136e-09	-0.0348597	0.93854	-0.926024	6.90435e-06	-1.21729	4.23712e-09	-0.0496793	0.890902	-0.700778	0.000774631	-0.879199	2.51476e-05	-0.134691	0.666221	-0.386224	0.230217	-0.810138	0.00138621	-0.244631	0.342723	-0.175143	0.701815	-1.00253	0.000134147	-0.216448	0.348707
ENSG00000137494	ANKRD42	0.290951	0.538972	-0.0334772	0.981261	-0.309537	0.25099	1.72373	2.95197e-07	0.255777	0.576759	0.137671	0.621481	1.59886	8.9724e-07	-0.110679	0.793803	-0.244465	0.367738	0.747667	0.00658849	-0.000766213	0.998342	-0.425276	0.133885	0.506622	0.0203426	-0.248671	0.293942	-0.281806	0.357761	0.137975	0.513715	-0.226128	0.286759
ENSG00000065413	ANKRD44	-0.999806	0.000704373	-0.30662	0.92996	-0.904458	0.000508039	-1.29837	1.22472e-06	0.599257	0.105724	0.0417458	0.889881	-0.241231	0.390216	0.999504	0.00165361	-0.00167238	0.995535	-0.270468	0.34308	0.799984	0.0105093	-0.319471	0.824913	0.745337	0.403969	0.262326	0.8186	-0.0983603	0.983742	-0.061829	0.947661	0.477935	0.601372
ENSG00000183831	ANKRD45	-1.17666	0.0882193	NA	NA	-0.478877	0.356422	-0.83607	0.104024	0.783958	0.292808	0.151036	0.788864	-1.07657	0.0494852	1.71484	0.0100741	2.0444	0.00246616	NA	NA	2.88076	0.000613381	NA	NA	2.9447	5.66808e-06	NA	NA	NA	NA	NA	NA	NA	NA
ENSG00000186106	ANKRD46	0.0423299	0.946787	0.289269	0.247159	1.37625	5.16531e-09	1.68903	1.95283e-11	0.385845	0.28243	1.54768	1.19553e-10	1.76741	8.70474e-12	0.337185	0.291814	1.26585	9.00824e-08	1.51463	3.0578e-10	0.218008	0.509395	0.166754	0.541223	1.10785	3.98917e-06	0.451806	0.0207967	0.192921	0.505411	0.614947	0.0011168	0.320101	0.0687113
ENSG00000168876	ANKRD49	-0.0996048	0.866534	0.163279	0.785093	-0.317632	0.224262	0.45654	0.0724502	0.200805	0.654202	0.0872161	0.756445	0.306723	0.23834	0.285288	0.414907	-0.105866	0.707175	0.28273	0.289553	0.340413	0.299776	-0.183484	0.586284	0.148211	0.531339	0.319052	0.217255	-0.209575	0.634929	0.0548281	0.811798	0.49327	0.0294265
ENSG00000151458	ANKRD50	0.256375	0.472874	0.0333137	0.993471	1.64447	1.45705e-12	1.2582	1.20145e-09	0.107281	0.792602	0.673141	0.00108988	0.509191	0.0139844	0.0761631	0.82596	0.419325	0.0482009	-0.0296183	0.904271	-0.161596	0.58782	-0.756336	0.311435	0.475518	0.375076	-0.527695	0.379873	-0.250553	0.869643	-0.324719	0.534654	-0.610877	0.247671
ENSG00000139645	ANKRD52	0.13857	0.762946	0.584236	0.320662	-1.14225	5.43405e-08	-1.21871	7.43124e-09	-0.667008	0.0247808	-1.01042	1.40308e-06	-1.06461	3.59643e-07	-0.599413	0.021675	-0.840979	6.94069e-05	-0.731521	0.000574536	-0.653899	0.00889496	-0.504591	0.388852	-0.136712	0.755555	-0.681574	0.120519	0.0420503	0.984759	-0.465727	0.231115	-0.913782	0.025786
ENSG00000144031	ANKRD53	NA	NA	0.030437	0.993471	NA	NA	NA	NA	NA	NA	NA	NA	NA	NA	NA	NA	NA	NA	NA	NA	NA	NA	-0.822366	0.134761	-3.55988	4.25908e-07	1.41895	0.00248389	-0.494953	0.459893	-2.53781	7.97605e-06	2.1633	1.34927e-05
ENSG00000100124	ANKRD54	0.150039	0.779266	0.00455242	0.998915	-0.468846	0.0563804	0.000941603	0.997666	-0.462723	0.194042	-0.52309	0.0328135	-0.0947524	0.723613	-0.622032	0.0387122	-0.428558	0.08549	-0.188842	0.476918	-0.730423	0.0111796	0.112385	0.8617	-0.376626	0.347691	0.00423957	0.994914	-0.0590631	0.978378	0.183421	0.631052	0.213594	0.606838
ENSG00000135299	ANKRD6	NA	NA	NA	NA	5.06741	1.03019e-11	4.67826	6.06165e-11	NA	NA	3.70831	1.01589e-09	3.40497	4.86237e-09	NA	NA	-0.922924	0.00474047	-0.992833	0.00269796	0.35088	0.386367	NA	NA	3.8373	1.98908e-05	NA	NA	2.11829	0.016083	3.77586	9.26042e-06	NA	NA
ENSG00000235098	ANKRD65	NA	NA	0.26074	0.880233	NA	NA	NA	NA	NA	NA	NA	NA	NA	NA	NA	NA	NA	NA	NA	NA	NA	NA	1.62469	0.0106202	-1.85748	0.00274754	0.0964686	0.892073	NA	NA	NA	NA	NA	NA
ENSG00000106013	ANKRD7	NA	NA	NA	NA	NA	NA	NA	NA	NA	NA	NA	NA	NA	NA	NA	NA	2.49754	0.00496022	1.90689	0.0251499	NA	NA	NA	NA	NA	NA	NA	NA	NA	NA	NA	NA	NA	NA
ENSG00000156381	ANKRD9	0.0160042	0.985799	0.0247286	0.993471	0.300162	0.363381	0.153255	0.655113	-0.598425	0.175094	0.432761	0.183425	0.438092	0.173426	-0.666995	0.0782948	0.084569	0.814069	0.0309579	0.933229	-0.668313	0.0819803	0.20946	0.697286	-0.28229	0.440606	-0.878087	0.0285145	0.147488	0.899608	0.32035	0.337425	-0.0508101	0.902587
ENSG00000064999	ANKS1A	-0.361448	0.270252	-0.216827	0.950351	0.278425	0.21463	0.709308	0.000879663	0.2369	0.513477	0.708699	0.000928549	1.11669	1.57462e-07	0.329664	0.256254	1.31735	7.30279e-09	1.442	1.65237e-09	0.453835	0.0909486	-0.572465	0.611247	1.60731	0.0348539	0.443728	0.620906	-0.0218967	0.996322	0.436295	0.546733	0.194358	0.8126
ENSG00000185046	ANKS1B	-1.87617	0.000238683	NA	NA	0.577582	0.130605	-0.109311	0.788525	0.573471	0.310925	1.13829	0.00641347	0.39796	0.333048	0.501017	0.352018	1.1486	0.00711865	0.408752	0.343318	-0.33895	0.568489	NA	NA	NA	NA	NA	NA	NA	NA	NA	NA	NA	NA
ENSG00000168096	ANKS3	-0.0748042	0.90388	0.0787354	0.968136	-1.21264	1.14176e-06	-0.871603	0.000462637	-0.0593486	0.911428	-0.946842	0.000151737	-0.803306	0.00127761	-0.0705305	0.868921	-0.4094	0.114402	-0.376024	0.151431	-0.0190582	0.964945	0.324119	0.553236	-0.965073	0.012559	0.579482	0.161291	0.120217	0.931931	-0.3598	0.305274	0.803608	0.0281242
ENSG00000165138	ANKS6	-0.49934	0.0838227	0.203528	0.541431	0.950837	8.76353e-06	1.12989	1.45619e-07	0.0955329	0.827436	1.29581	2.20854e-09	1.44647	3.35291e-11	0.381361	0.181621	0.742865	0.000590277	0.716933	0.000956751	0.252026	0.388824	0.244	0.374574	1.35001	5.19991e-07	0.400954	0.0476894	0.43267	0.0505449	1.18725	1.07901e-06	0.388326	0.036223
ENSG00000163516	ANKZF1	-0.493297	0.16846	0.0469147	0.982556	0.271316	0.284683	0.803325	0.00227694	0.337362	0.392505	0.743227	0.00437403	0.860937	0.00123859	0.690022	0.0333985	0.849447	0.00147711	0.989253	0.000340026	0.49447	0.12263	-0.197772	0.665641	0.118071	0.719648	-0.295871	0.405333	-0.134989	0.889228	-0.0350554	0.912163	-0.475525	0.119654
ENSG00000011426	ANLN	0.294094	0.840067	0.267481	0.786245	-4.72238	4.40923e-07	-4.90912	2.6807e-07	-1.70021	0.0787581	-3.94213	4.29988e-06	-4.14794	2.08341e-06	-1.01006	0.237087	-2.60567	0.000455976	-2.9408	0.000145098	-1.08526	0.186386	-2.89413	4.77044e-06	-4.21814	9.39017e-09	-3.93689	9.03422e-08	-3.01937	1.83047e-06	-4.14907	7.89816e-09	-3.03756	8.1445e-07
ENSG00000131620	ANO1	NA	NA	0.689318	0.123614	NA	NA	NA	NA	NA	NA	NA	NA	NA	NA	NA	NA	0.731795	0.284555	-0.875685	0.209308	NA	NA	0.2042	0.688694	-1.05134	0.00432149	-1.13711	0.00398276	0.845194	0.040118	-0.0336989	0.926952	-0.885169	0.0156102
ENSG00000160746	ANO10	0.231009	0.530545	-0.0950863	0.893279	0.906679	9.17153e-06	0.925609	5.8277e-06	0.148329	0.699004	1.04708	3.18311e-07	1.06675	1.78471e-07	0.0235439	0.950191	0.680193	0.00104697	0.892627	1.69347e-05	0.0645092	0.848447	0.0315661	0.931923	0.363153	0.0849011	-0.304852	0.196601	0.0693818	0.92909	0.59343	0.00299973	-0.0209262	0.93291
ENSG00000047617	ANO2	NA	NA	NA	NA	NA	NA	NA	NA	NA	NA	3.67152	8.40503e-05	NA	NA	NA	NA	2.5514	5.1625e-05	1.70135	0.00291781	0.184003	0.820889	NA	NA	NA	NA	NA	NA	NA	NA	NA	NA	NA	NA
ENSG00000151572	ANO4	NA	NA	-0.786159	0.551542	2.73447	0.0015696	2.80138	0.00109909	NA	NA	NA	NA	NA	NA	NA	NA	2.39668	0.000997858	1.06388	0.121152	NA	NA	0.781344	0.461504	1.52958	0.0353686	-0.00503829	0.996148	0.996521	0.299478	0.916751	0.158133	-1.12781	0.122644
ENSG00000171714	ANO5	NA	NA	NA	NA	4.48532	2.65568e-06	4.80584	6.31167e-07	NA	NA	NA	NA	9.10051	5.40141e-09	NA	NA	4.81456	1.13442e-06	4.46607	3.56993e-06	NA	NA	NA	NA	8.59838	6.07926e-06	NA	NA	NA	NA	NA	NA	NA	NA
ENSG00000177119	ANO6	-0.255863	0.520677	0.147028	0.957307	-0.892625	0.000499619	-1.20179	1.32134e-05	0.495348	0.14366	-0.724282	0.00355945	-1.11954	3.29023e-05	0.545815	0.0670493	-0.870322	0.000747118	-0.957389	0.000283864	0.315293	0.288274	-0.705065	0.379891	-0.326723	0.573284	0.0152759	0.985427	-0.241246	0.888077	-1.19418	0.0292836	-0.169927	0.781414
ENSG00000146205	ANO7	0.0283883	0.979473	-0.1482	0.926992	1.68003	5.02876e-06	1.15361	0.00171438	-0.302155	0.649303	1.64994	7.15772e-06	1.14285	0.00190998	-0.269173	0.619542	-1.00765	0.00560589	-1.21611	0.000767205	-1.27966	0.00152335	-0.115122	0.865583	-0.921682	0.0309284	-0.634417	0.17212	-0.52629	0.412488	-0.468924	0.232208	-0.771394	0.0658212
ENSG00000237276	ANO7L1	NA	NA	NA	NA	3.26645	7.93757e-09	3.00408	3.51877e-08	NA	NA	3.46469	1.9059e-09	3.34187	3.46655e-09	NA	NA	3.1324	2.29491e-08	2.94698	6.61698e-08	NA	NA	NA	NA	1.8788	4.87826e-05	NA	NA	NA	NA	1.88247	1.10273e-05	NA	NA
ENSG00000074855	ANO8	-0.123944	0.822289	-0.319283	0.171569	0.702922	0.00334351	0.694826	0.00373644	0.255239	0.528982	0.754254	0.00166747	0.682892	0.00434896	0.407181	0.1992	0.216499	0.401408	0.221879	0.393785	0.324358	0.302295	0.151887	0.533273	1.23754	3.13531e-07	-0.40757	0.0301558	-0.0116495	0.990044	0.988733	1.22361e-06	-0.0623437	0.734372
ENSG00000185101	ANO9	NA	NA	NA	NA	8.75545	5.64934e-07	7.64367	3.84983e-06	NA	NA	8.00332	1.41027e-06	8.17106	9.96078e-07	NA	NA	7.4949	8.19969e-06	6.50554	6.04296e-05	NA	NA	NA	NA	NA	NA	NA	NA	NA	NA	NA	NA	NA	NA
ENSG00000011201	ANOS1	NA	NA	2.65857	0.00529479	NA	NA	NA	NA	NA	NA	NA	NA	NA	NA	NA	NA	NA	NA	NA	NA	NA	NA	1.08697	0.255241	3.75189	3.2144e-05	0.470524	0.567674	2.94277	0.00131477	4.9865	8.71074e-07	NA	NA
ENSG00000140350	ANP32A	0.115916	0.806435	-0.239049	0.74704	-0.81208	7.41803e-05	-0.849115	3.36954e-05	-0.208452	0.559544	-0.922584	6.7436e-06	-0.927313	5.61847e-06	-0.316026	0.256857	-1.09204	1.59727e-07	-0.760556	0.00025019	-0.303755	0.263141	-0.0593786	0.90891	-0.338674	0.2688	-0.807737	0.018206	-0.340419	0.503425	0.0435575	0.887283	-0.771735	0.0132157
ENSG00000259516	ANP32AP1	NA	NA	-0.501129	0.471382	NA	NA	NA	NA	NA	NA	NA	NA	NA	NA	NA	NA	NA	NA	NA	NA	NA	NA	0.19169	0.761038	-0.411188	0.330513	-0.816614	0.0783525	-0.369881	0.637929	-0.092468	0.824102	-0.828221	0.0468449
ENSG00000136938	ANP32B	-0.140316	0.756732	-0.284858	0.764749	-3.02088	1.05909e-12	-3.23892	3.14395e-13	-0.520776	0.101301	-2.60367	1.52945e-11	-3.03719	1.01376e-12	-0.316865	0.272182	-2.36992	1.47617e-10	-2.39373	1.25738e-10	-0.211891	0.470371	-0.00657461	0.992989	-1.84164	6.36992e-05	0.22085	0.636623	-0.392958	0.551978	-1.15378	0.00242114	0.649671	0.0770863
ENSG00000259790	ANP32BP1	0.310384	0.694793	-0.273981	0.671784	-1.8669	0.000412629	-2.2974	3.70004e-05	-0.96626	0.129905	-3.25315	1.08507e-06	-2.94459	1.76118e-06	-1.00064	0.0623188	NA	NA	NA	NA	NA	NA	-0.0328171	0.953487	-1.83372	5.01138e-06	0.0946451	0.810475	-0.440626	0.302228	-1.24535	0.000136835	0.559205	0.0534854
ENSG00000259461	ANP32BP3	NA	NA	NA	NA	NA	NA	NA	NA	NA	NA	NA	NA	NA	NA	NA	NA	NA	NA	NA	NA	NA	NA	NA	NA	NA	NA	NA	NA	NA	NA	NA	NA	0.784829	0.082291
ENSG00000248546	ANP32C	NA	NA	-0.26263	0.835508	NA	NA	NA	NA	NA	NA	NA	NA	NA	NA	NA	NA	NA	NA	NA	NA	NA	NA	-0.567346	0.377061	-0.357421	0.430301	-1.02851	0.0407126	-0.438426	0.586664	-0.482666	0.249557	NA	NA
ENSG00000143401	ANP32E	0.0186305	0.983228	-0.109732	0.893279	-2.06951	2.65065e-07	-2.10009	1.8585e-07	-1.02251	0.0267075	-1.82677	1.7359e-06	-1.77516	2.13926e-06	-0.603234	0.126506	-1.53237	2.36551e-05	-1.37104	9.74758e-05	-0.447897	0.251436	-0.764334	0.0117542	-1.74413	6.374e-07	-1.23158	9.91799e-05	-0.84786	0.00459652	-1.63757	5.01464e-07	-0.778925	0.00263602
ENSG00000166825	ANPEP	0.292282	0.725802	-0.499526	0.0205369	0.76341	0.0667439	0.143216	0.74551	0.916876	0.128567	1.25476	0.00376235	0.779814	0.0595636	-0.0311161	0.966534	1.73741	0.000340708	0.833166	0.0660743	-1.15314	0.0562168	0.284584	0.212748	-0.231038	0.178956	-0.124731	0.546109	0.243902	0.317998	-0.645795	0.000327688	-0.298413	0.0756489
ENSG00000169604	ANTXR1	0.127012	0.806435	-0.227696	0.84387	-0.614784	0.0122974	-0.702693	0.0045293	0.35335	0.33027	-0.807405	0.00148659	-0.984157	0.000172956	0.71062	0.0204036	-1.28848	7.19705e-06	-1.31199	6.08021e-06	0.524032	0.0727661	-0.0657054	0.92771	-0.942716	0.0228075	1.65543	0.000681733	0.161647	0.900153	-1.08711	0.00776137	1.34805	0.00153055
ENSG00000163297	ANTXR2	0.387035	0.263671	0.406792	0.468816	0.0056885	0.982865	-0.533451	0.0250584	0.417258	0.224936	-0.0525933	0.837655	-0.576312	0.0156095	0.470251	0.116376	-0.491661	0.0400502	-0.662208	0.00703989	-0.269385	0.375916	-0.597547	0.200807	-1.23108	0.00117573	0.156768	0.715777	-0.374325	0.502195	-1.22601	0.000837165	0.406562	0.225951
ENSG00000198250	ANTXRL	NA	NA	NA	NA	NA	NA	NA	NA	NA	NA	NA	NA	NA	NA	NA	NA	4.35237	4.76125e-05	4.14317	7.9076e-05	NA	NA	NA	NA	NA	NA	NA	NA	NA	NA	NA	NA	NA	NA
ENSG00000135046	ANXA1	0.355248	0.27969	-0.455973	0.319372	0.758847	0.000456159	-0.047196	0.845831	-0.167808	0.670045	0.103043	0.666137	-0.478703	0.0265258	-0.103046	0.765422	0.903748	7.04954e-05	0.709869	0.00105575	-0.320746	0.25247	-0.324238	0.466793	-1.78511	7.53412e-06	-0.821906	0.0155051	-0.303273	0.565875	-0.71287	0.0145144	0.173622	0.583141
ENSG00000109511	ANXA10	NA	NA	-2.06177	0.0316949	NA	NA	NA	NA	NA	NA	NA	NA	NA	NA	NA	NA	3.01067	0.00467218	NA	NA	NA	NA	1.75682	0.0607217	-0.776299	0.322463	-3.0015	0.00516315	1.24496	0.157928	-1.97292	0.00740462	-3.57799	0.00028365
ENSG00000122359	ANXA11	0.114078	0.811829	-0.0811059	0.950009	-1.14964	3.47898e-08	-1.43095	9.98884e-11	0.0609858	0.887874	-0.902648	1.36056e-05	-1.20197	8.10967e-09	0.105669	0.750954	-0.582918	0.005835	-0.486605	0.0229822	0.261281	0.348722	0.0365854	0.940557	-0.844996	0.00338908	-0.0544465	0.883663	-0.199577	0.726552	-0.350051	0.159159	0.144583	0.609037
ENSG00000182718	ANXA2	0.169184	0.708335	-0.578184	0.306961	0.719216	0.00164638	0.287475	0.206217	-0.0821462	0.85549	0.86762	0.00026444	0.73038	0.00142093	0.157206	0.637545	0.718034	0.00174614	0.727491	0.00167963	0.16198	0.610193	0.319137	0.561401	0.354826	0.348891	-1.17596	0.00623153	0.0937262	0.950303	0.943807	0.00735145	-0.649043	0.0787766
ENSG00000213406	ANXA2P1	0.00126983	0.998752	-0.28254	0.75736	0.495467	0.0853404	-0.0769891	0.808338	-0.479853	0.251624	0.494435	0.0898509	0.248478	0.408312	-0.271423	0.493214	0.583663	0.0438382	0.711233	0.0131798	0.0648904	0.89094	0.362468	0.509044	0.411699	0.271647	-1.35933	0.00209804	0.335467	0.619603	1.12117	0.00205334	-0.6464	0.079591
ENSG00000231991	ANXA2P2	0.1254	0.785303	-0.445807	0.242677	0.651971	0.0015293	0.0917544	0.69024	-0.233637	0.497536	0.639856	0.00191129	0.416186	0.0462794	-0.167954	0.585179	0.516234	0.0138278	0.535994	0.0106514	0.0116014	0.974073	0.268533	0.487713	0.455096	0.0857472	-1.26838	0.00016214	0.250312	0.591081	0.98606	0.000255427	-0.868465	0.00206777
ENSG00000216740	ANXA2P3	NA	NA	-0.520699	0.390439	NA	NA	NA	NA	NA	NA	NA	NA	NA	NA	NA	NA	NA	NA	NA	NA	NA	NA	0.165634	0.78189	0.459015	0.231017	-1.13632	0.0102542	0.21187	0.827791	1.18101	0.00139778	-0.20234	0.613602
ENSG00000177721	ANXA2R	-0.275226	0.723175	0.384851	0.739962	-0.731684	0.08149	-1.18748	0.00357253	0.324809	0.609829	-0.563151	0.194492	-0.944194	0.0249365	0.5473	0.263975	0.216427	0.638262	-0.00280088	0.99504	0.57801	0.238639	-0.469434	0.521918	-0.732489	0.139478	0.82072	0.115553	NA	NA	0.142142	0.778027	1.63785	0.00123475
ENSG00000138772	ANXA3	-0.856944	0.15696	0.681237	0.418356	0.977416	0.0192272	-0.450586	0.297422	0.147761	0.856108	1.41531	0.00193886	0.0102624	0.983776	0.441293	0.464948	-2.29985	1.46937e-06	-2.6481	2.13386e-07	0.215766	0.683888	0.956754	0.179593	-1.54905	0.00620116	-0.589748	0.324825	0.988521	0.135105	-0.790763	0.120197	0.521302	0.319324
ENSG00000196975	ANXA4	-0.148253	0.74322	0.0691261	0.86809	-1.54775	4.19005e-10	-1.76669	5.42822e-11	0.306784	0.360895	-0.837137	6.38899e-05	-1.11359	1.84031e-07	0.560754	0.0336903	-0.734088	0.000508151	-0.831804	8.38127e-05	0.546003	0.0328445	-0.152652	0.410807	-1.30967	6.80563e-09	0.257395	0.0767313	-0.0834068	0.793634	-0.878793	3.70116e-07	0.186726	0.14396
ENSG00000164111	ANXA5	0.165201	0.710331	-0.619367	0.0725308	0.392676	0.0746658	0.138263	0.556206	-0.144133	0.72517	0.470959	0.0315901	0.282001	0.207396	-0.019806	0.960918	0.285574	0.207303	0.393198	0.0783766	0.0476349	0.895578	0.247282	0.523278	0.346067	0.193709	-0.492604	0.0923158	-0.0867747	0.930497	0.348587	0.146671	-0.340898	0.189103
ENSG00000197043	ANXA6	0.321507	0.3339	0.0996778	0.888304	-0.0120685	0.960523	-0.191198	0.393537	-0.304759	0.360895	-0.180199	0.427501	-0.289864	0.183034	-0.336508	0.23146	-0.435351	0.0432683	-0.339499	0.123048	-0.206118	0.48228	-0.220404	0.477173	-0.658915	0.00370531	-1.15689	4.61467e-05	-0.167299	0.701615	-0.349075	0.0751196	-0.796839	0.000701948
ENSG00000138279	ANXA7	-0.0142482	0.982031	-0.0793966	0.85974	-0.405553	0.0554753	-0.479718	0.0217669	-0.21651	0.541523	-0.287392	0.184895	-0.368364	0.0815369	-0.168368	0.587075	-0.575113	0.00615561	-0.554497	0.00853765	-0.108953	0.733561	0.366404	0.0424617	-0.451909	0.00348772	-0.332898	0.0388077	0.136074	0.602735	-0.159753	0.232429	-0.330305	0.0228554
ENSG00000165390	ANXA8	0.41596	0.744572	NA	NA	NA	NA	NA	NA	0.753472	0.44248	1.10731	0.0639222	-0.16501	0.802804	1.56866	0.0346282	-1.76732	0.0020098	-2.01241	0.00065301	0.455857	0.516469	NA	NA	NA	NA	NA	NA	NA	NA	NA	NA	NA	NA
ENSG00000150165	ANXA8L1	-0.548858	0.329618	NA	NA	-0.573642	0.123359	-1.65689	0.00010043	0.589725	0.269999	0.781118	0.0365932	-0.280697	0.465977	1.10294	0.0183472	-1.00245	0.00594632	-1.28857	0.000721582	0.158476	0.756367	NA	NA	NA	NA	NA	NA	NA	NA	NA	NA	NA	NA
ENSG00000186807	ANXA8L2	1.99583	0.000642894	NA	NA	2.75544	6.67177e-07	NA	NA	1.17714	0.0986682	1.90335	1.17769e-05	0.641214	0.0935926	0.863857	0.0737288	-1.47503	9.43721e-05	-1.85665	5.59913e-06	0.0382919	0.943354	NA	NA	NA	NA	NA	NA	NA	NA	NA	NA	NA	NA
ENSG00000143412	ANXA9	-0.253184	0.787827	NA	NA	0.283355	0.529377	0.214915	0.63905	0.576256	0.395654	0.630698	0.1529	0.609715	0.164056	1.05466	0.0584465	1.09155	0.0165701	1.03188	0.0234912	1.30129	0.0200682	NA	NA	4.36215	7.88167e-06	NA	NA	2.63632	0.00134148	4.45321	3.11272e-07	NA	NA
ENSG00000131480	AOC2	-0.187289	0.811829	NA	NA	1.15911	0.000864127	2.04313	2.74332e-07	-0.407053	0.477213	1.68592	6.48926e-06	2.34681	2.93037e-08	-0.717869	0.109868	1.94252	8.95016e-07	2.31881	6.24696e-08	-0.711026	0.114524	0.746922	0.075241	2.15893	1.23305e-06	0.483751	0.186626	1.00886	0.0104548	2.34917	8.98841e-08	1.00812	0.00319741
ENSG00000131471	AOC3	NA	NA	NA	NA	1.69285	0.00778313	1.78895	0.00445257	NA	NA	1.90561	0.00479297	2.50276	0.000271155	NA	NA	2.91943	6.60551e-05	3.23771	1.69347e-05	NA	NA	2.63899	1.64719e-07	2.84225	5.74262e-09	1.64509	1.33916e-05	2.40386	1.28653e-07	2.75871	2.51078e-09	1.71708	4.10562e-06
ENSG00000138356	AOX1	1.67954	5.31495e-07	-0.994304	0.0897142	-0.108046	0.657722	-0.845745	0.000749662	0.0828422	0.853885	-0.954654	0.000176086	-1.64043	9.0848e-08	-0.0895431	0.802857	-0.645466	0.00722292	-0.923805	0.000298634	-0.0136511	0.971393	0.561835	0.38903	-0.370573	0.4187	1.66289	0.00165852	0.526429	0.435165	-0.624762	0.14784	1.89135	0.000194175
ENSG00000234509	AP000253.1	NA	NA	NA	NA	NA	NA	0.423893	0.396341	0.69218	0.311031	NA	NA	NA	NA	NA	NA	1.85743	0.000923032	NA	NA	NA	NA	NA	NA	NA	NA	NA	NA	NA	NA	NA	NA	NA	NA
ENSG00000226527	AP000289.6	NA	NA	NA	NA	NA	NA	NA	NA	NA	NA	NA	NA	NA	NA	NA	NA	8.08275	7.34435e-06	NA	NA	NA	NA	NA	NA	NA	NA	NA	NA	NA	NA	NA	NA	NA	NA
ENSG00000223799	AP000295.7	NA	NA	NA	NA	NA	NA	3.86463	6.34982e-06	NA	NA	4.11099	1.74635e-06	4.33981	5.90152e-07	NA	NA	5.33698	1.99412e-06	NA	NA	NA	NA	NA	NA	NA	NA	NA	NA	NA	NA	NA	NA	NA	NA
ENSG00000249209	AP000304.12	0.244929	0.507146	NA	NA	0.0405855	0.864202	0.136277	0.54864	-0.0943959	0.822322	-0.138159	0.546232	-0.0864743	0.707794	-0.15982	0.610697	0.106287	0.65048	0.29069	0.188814	-0.126627	0.689563	NA	NA	NA	NA	NA	NA	NA	NA	NA	NA	NA	NA
ENSG00000240368	AP000304.2	0.536212	0.40324	NA	NA	-1.21681	0.00983434	-0.461657	0.308723	-0.229858	0.769385	-2.62235	1.05518e-06	-1.59877	0.000283399	-0.548552	0.290645	-1.69743	0.000409978	-1.1481	0.0108941	-0.233718	0.701923	NA	NA	NA	NA	NA	NA	NA	NA	NA	NA	NA	NA
ENSG00000214955	AP000318.2	0.854235	0.0060047	NA	NA	0.646329	0.00937758	0.149021	0.561928	-0.468002	0.198439	0.0445819	0.867542	-0.173106	0.491833	-0.447903	0.153823	0.607187	0.0145719	0.605393	0.0153079	-0.118932	0.743309	NA	NA	NA	NA	NA	NA	NA	NA	NA	NA	NA	NA
ENSG00000225555	AP000320.6	NA	NA	NA	NA	4.04764	1.40973e-07	NA	NA	NA	NA	NA	NA	NA	NA	NA	NA	3.20216	4.45288e-06	NA	NA	NA	NA	NA	NA	NA	NA	NA	NA	NA	NA	NA	NA	NA	NA
ENSG00000234380	AP000330.8	NA	NA	NA	NA	3.92986	1.31426e-07	2.67521	5.89334e-05	NA	NA	3.13464	3.57932e-06	NA	NA	NA	NA	0.576535	0.209541	-0.0428188	0.932876	0.398858	0.504398	NA	NA	NA	NA	NA	NA	NA	NA	NA	NA	NA	NA
ENSG00000211683	AP000346.2	-1.26808	0.0562764	NA	NA	0.71537	0.115714	0.802811	0.0724432	0.456722	0.539213	1.61837	0.00200322	1.96068	0.000213157	NA	NA	NA	NA	1.49753	0.00531575	1.57079	0.0170358	NA	NA	NA	NA	NA	NA	NA	NA	NA	NA	NA	NA
ENSG00000234353	AP000347.4	-1.19727	0.0260598	NA	NA	1.00279	0.0101669	1.08317	0.00543969	0.841878	0.128567	2.07552	1.09237e-05	2.20141	3.98125e-06	1.61993	0.00320924	1.11512	0.00779902	0.897342	0.0330487	1.006	0.0482808	NA	NA	NA	NA	NA	NA	NA	NA	NA	NA	NA	NA
ENSG00000251357	AP000350.10	0.0324617	0.981464	NA	NA	0.0772455	0.879393	-0.781373	0.103069	-0.302313	0.727395	-0.577335	0.232525	-0.661999	0.1656	-0.406928	0.544609	-0.60638	0.216237	-0.919697	0.0630498	-0.388382	0.55982	NA	NA	NA	NA	NA	NA	NA	NA	NA	NA	NA	NA
ENSG00000218537	AP000350.4	0.117693	0.900177	NA	NA	-0.672804	0.127672	-0.449909	0.298111	0.528517	0.372937	-0.261385	0.565182	-0.30512	0.488741	0.122116	0.845919	-0.613582	0.16731	-1.45147	0.000777428	0.142374	0.81517	NA	NA	NA	NA	NA	NA	NA	NA	NA	NA	NA	NA
ENSG00000224334	AP000357.4	NA	NA	NA	NA	4.96733	5.4452e-12	3.85082	5.39486e-10	NA	NA	2.7297	1.0307e-07	1.77768	6.82363e-05	NA	NA	NA	NA	NA	NA	NA	NA	NA	NA	NA	NA	NA	NA	NA	NA	NA	NA	NA	NA
ENSG00000255980	AP000439.1	NA	NA	NA	NA	8.46587	1.56584e-07	NA	NA	NA	NA	9.21482	2.79344e-08	8.05062	3.24889e-07	NA	NA	9.29205	4.28413e-08	NA	NA	NA	NA	NA	NA	NA	NA	NA	NA	NA	NA	NA	NA	NA	NA
ENSG00000255139	AP000442.1	NA	NA	NA	NA	2.2442	0.00126707	1.96255	0.00385873	NA	NA	NA	NA	NA	NA	NA	NA	NA	NA	NA	NA	NA	NA	NA	NA	NA	NA	NA	NA	NA	NA	NA	NA	NA	NA
ENSG00000246889	AP000487.5	0.556829	0.422153	NA	NA	NA	NA	NA	NA	NA	NA	-1.12424	0.0169825	-1.72472	0.00028133	-0.162298	0.803921	NA	NA	NA	NA	NA	NA	NA	NA	NA	NA	NA	NA	NA	NA	NA	NA	NA	NA
ENSG00000206195	AP000525.8	1.05259	0.116618	NA	NA	NA	NA	NA	NA	0.43655	0.607582	0.468331	0.320325	0.337694	0.475352	1.14143	0.0496363	-0.0677079	0.885136	-0.145511	0.753876	0.621036	0.25185	NA	NA	NA	NA	NA	NA	NA	NA	NA	NA	NA	NA
ENSG00000219529	AP000580.1	1.11075	0.015829	NA	NA	-0.512719	0.262128	-0.268215	0.554269	0.229561	0.758608	-0.892605	0.0288116	-1.05531	0.00847489	-0.357997	0.486162	0.15544	0.733805	0.12887	0.777792	0.226167	0.685321	NA	NA	NA	NA	NA	NA	NA	NA	NA	NA	NA	NA
ENSG00000269895	AP000654.4	NA	NA	NA	NA	1.05345	0.0535792	NA	NA	NA	NA	NA	NA	NA	NA	0.725647	0.242692	0.263904	0.62585	0.050083	0.929979	0.962401	0.110674	NA	NA	NA	NA	NA	NA	NA	NA	NA	NA	NA	NA
ENSG00000254602	AP000662.4	NA	NA	NA	NA	NA	NA	NA	NA	NA	NA	NA	NA	NA	NA	NA	NA	NA	NA	NA	NA	0.926276	0.229776	NA	NA	NA	NA	NA	NA	NA	NA	NA	NA	NA	NA
ENSG00000231106	AP000688.8	NA	NA	NA	NA	NA	NA	NA	NA	NA	NA	NA	NA	NA	NA	NA	NA	0.600846	0.20853	0.363212	0.460173	1.29082	0.0267495	NA	NA	NA	NA	NA	NA	NA	NA	NA	NA	NA	NA
ENSG00000228107	AP000692.9	-0.291539	0.723937	NA	NA	1.1797	0.00345401	1.02642	0.00981108	0.127276	0.872006	1.5157	0.000231786	1.48689	0.000262805	0.442293	0.414796	0.820365	0.0683604	0.686228	0.126092	NA	NA	NA	NA	NA	NA	NA	NA	NA	NA	NA	NA	NA	NA
ENSG00000233818	AP000695.4	-1.87498	0.0672815	NA	NA	-0.469021	0.526648	-2.06599	0.0101162	-0.698787	0.549856	NA	NA	NA	NA	NA	NA	-1.05758	0.120213	-2.07238	0.00445297	-1.08552	0.185767	NA	NA	NA	NA	NA	NA	NA	NA	NA	NA	NA	NA
ENSG00000230479	AP000695.6	NA	NA	NA	NA	0.731065	0.282618	NA	NA	NA	NA	1.79385	0.0153393	NA	NA	NA	NA	-0.641756	0.340314	-2.03066	0.00509536	-1.32481	0.106936	NA	NA	NA	NA	NA	NA	NA	NA	NA	NA	NA	NA
ENSG00000256100	AP000721.4	-0.0471429	0.963822	NA	NA	-0.678517	0.0695145	-1.12772	0.00367724	-1.08586	0.0511355	-1.15965	0.00313618	-1.20997	0.00201563	-0.77299	0.110218	-0.909339	0.0173132	-0.959387	0.0129565	-0.533122	0.268879	NA	NA	NA	NA	NA	NA	NA	NA	NA	NA	NA	NA
ENSG00000173727	AP000769.1	-0.221033	0.795607	NA	NA	4.77664	1.1244e-12	4.29889	7.16578e-12	0.346174	0.59234	5.22098	3.6979e-13	5.08082	5.54381e-13	0.0588188	0.931534	4.0647	1.81516e-11	4.05459	2.0578e-11	-0.214634	0.675338	NA	NA	NA	NA	NA	NA	NA	NA	NA	NA	NA	NA
ENSG00000254667	AP000783.1	NA	NA	NA	NA	NA	NA	NA	NA	NA	NA	NA	NA	NA	NA	NA	NA	-1.96141	0.00160251	-2.04861	0.000831201	-0.870631	0.159898	NA	NA	NA	NA	NA	NA	NA	NA	NA	NA	NA	NA
ENSG00000256786	AP001029.1	0.535621	0.321414	NA	NA	0.232713	0.564696	-0.667688	0.0803767	-0.102728	0.886834	-0.295074	0.454008	-0.874091	0.0180799	-0.287216	0.564011	0.136743	0.738156	-0.655236	0.0800841	-0.041761	0.943767	NA	NA	NA	NA	NA	NA	NA	NA	NA	NA	NA	NA
ENSG00000241238	AP001052.9	NA	NA	NA	NA	NA	NA	NA	NA	NA	NA	NA	NA	NA	NA	0.531594	0.411789	NA	NA	NA	NA	NA	NA	NA	NA	NA	NA	NA	NA	NA	NA	NA	NA	NA	NA
ENSG00000248354	AP001055.7	0.0183076	0.981335	NA	NA	-0.451824	0.0841463	-0.188546	0.494386	0.178186	0.70639	-0.4453	0.0912138	-0.360666	0.172422	0.0202224	0.966338	-0.0975059	0.736575	-0.0807738	0.784446	0.263802	0.453886	NA	NA	NA	NA	NA	NA	NA	NA	NA	NA	NA	NA
ENSG00000255902	AP001062.1	0.345821	0.682799	NA	NA	-0.919856	0.0503412	-1.42631	0.00359732	-0.431609	0.570611	-0.954637	0.03949	-0.610679	0.169222	-0.611638	0.295005	-1.26127	0.00548272	-1.19192	0.00790924	-1.41113	0.0101827	NA	NA	NA	NA	NA	NA	NA	NA	NA	NA	NA	NA
ENSG00000184441	AP001062.7	0.314709	0.585997	NA	NA	-0.542372	0.111636	-0.953082	0.00399546	-0.0488686	0.942904	-0.804433	0.016509	-0.716317	0.030743	-0.478375	0.246769	-0.975053	0.0029269	-1.0728	0.00103062	-1.12793	0.00231916	NA	NA	NA	NA	NA	NA	NA	NA	NA	NA	NA	NA
ENSG00000241728	AP001062.8	-0.32354	0.613815	NA	NA	-0.279191	0.473067	-0.616634	0.0923084	0.0658553	0.928281	-0.391906	0.312126	-0.460702	0.223008	0.0230882	0.970484	-0.313429	0.435522	-0.579119	0.134911	0.49451	0.278283	NA	NA	NA	NA	NA	NA	NA	NA	NA	NA	NA	NA
ENSG00000245571	AP001258.4	0.751699	0.0487563	NA	NA	0.420624	0.190314	0.114965	0.739779	0.575741	0.190324	-0.111906	0.745771	-0.198798	0.54906	0.211866	0.629738	0.165438	0.627618	0.0163399	0.963331	0.221024	0.610071	NA	NA	NA	NA	NA	NA	NA	NA	NA	NA	NA	NA
ENSG00000175827	AP001266.1	0.144955	0.814515	NA	NA	-1.82244	1.85232e-08	-2.09457	1.89812e-09	-0.539393	0.173549	-1.92215	8.33817e-09	-2.02227	3.22992e-09	-0.597284	0.0813925	-1.69992	7.10922e-08	-2.18459	1.27328e-09	-0.774611	0.0175406	NA	NA	NA	NA	NA	NA	NA	NA	NA	NA	NA	NA
ENSG00000224905	AP001347.6	0.625518	0.47564	NA	NA	-5.06345	2.73026e-06	-2.74383	0.000168821	-0.542898	0.551665	-3.37656	1.80958e-05	-3.16376	2.09744e-05	-1.18971	0.0812498	NA	NA	NA	NA	0.0359429	0.969872	NA	NA	NA	NA	NA	NA	NA	NA	NA	NA	NA	NA
ENSG00000254837	AP001372.2	-0.78059	0.041091	NA	NA	1.00195	0.000995658	0.635275	0.0401148	0.647462	0.128403	1.08898	0.000462581	0.772713	0.0136087	0.901584	0.013449	2.08225	3.16169e-09	1.58279	5.52839e-07	1.25789	0.000457774	NA	NA	NA	NA	NA	NA	NA	NA	NA	NA	NA	NA
ENSG00000270116	AP001429.1	NA	NA	NA	NA	1.40529	0.00367315	NA	NA	NA	NA	1.11978	0.024593	NA	NA	NA	NA	NA	NA	NA	NA	NA	NA	NA	NA	NA	NA	NA	NA	NA	NA	NA	NA	NA	NA
ENSG00000242553	AP001432.14	0.524737	0.429252	NA	NA	0.189156	0.683665	-0.173317	0.708088	-0.166453	0.839235	-0.226999	0.612498	-0.0635105	0.892229	-0.0512045	0.941176	NA	NA	NA	NA	NA	NA	NA	NA	NA	NA	NA	NA	NA	NA	NA	NA	NA	NA
ENSG00000235878	AP001468.1	0.248373	0.814915	NA	NA	0.626766	0.192578	0.592393	0.22015	0.651904	0.384651	1.09099	0.0246436	0.713002	0.136822	0.8819	0.153679	0.258292	0.616778	0.0277912	0.958943	0.963761	0.117818	NA	NA	NA	NA	NA	NA	NA	NA	NA	NA	NA	NA
ENSG00000239415	AP001469.9	-0.031507	0.973856	NA	NA	-0.851581	0.0167508	-0.367829	0.312307	-0.10495	0.875451	-0.872619	0.0149583	-0.524923	0.142961	0.0513883	0.930479	-0.558965	0.127611	-0.432029	0.247177	-0.236344	0.631746	NA	NA	NA	NA	NA	NA	NA	NA	NA	NA	NA	NA
ENSG00000254531	AP001816.1	-0.245828	0.654818	NA	NA	2.53591	1.31151e-09	2.26689	1.20175e-08	0.176394	0.738615	2.49233	2.19148e-09	2.37061	5.95242e-09	0.669289	0.0710612	2.85044	4.7451e-10	2.74249	1.0715e-09	0.557085	0.145339	NA	NA	NA	NA	NA	NA	NA	NA	NA	NA	NA	NA
ENSG00000255176	AP002954.3	-0.436464	0.467328	NA	NA	-0.0881574	0.833167	-0.0990716	0.810556	-0.00550297	0.994774	-0.0455877	0.915887	-0.048536	0.912562	0.490155	0.293434	0.332756	0.43646	0.156118	0.728024	0.467518	0.349593	NA	NA	NA	NA	NA	NA	NA	NA	NA	NA	NA	NA
ENSG00000255200	AP003068.18	0.045488	0.967103	NA	NA	-0.262282	0.560479	-1.22988	0.00343	0.679621	0.215062	-0.614304	0.156264	-0.836275	0.046638	0.702523	0.133188	-1.19871	0.00329779	-1.37619	0.000593345	0.448584	0.347103	NA	NA	NA	NA	NA	NA	NA	NA	NA	NA	NA	NA
ENSG00000254614	AP003068.23	0.238009	0.748939	NA	NA	-0.184918	0.653892	-1.3506	0.000409638	0.606798	0.23879	-0.211153	0.603917	-0.860087	0.0221578	0.551423	0.215281	-0.541926	0.150065	-1.02584	0.00509305	0.484793	0.273984	NA	NA	NA	NA	NA	NA	NA	NA	NA	NA	NA	NA
ENSG00000254501	AP003068.9	NA	NA	NA	NA	NA	NA	6.7284	7.88404e-07	NA	NA	NA	NA	7.40314	9.88077e-08	NA	NA	NA	NA	NA	NA	NA	NA	NA	NA	NA	NA	NA	NA	NA	NA	NA	NA	NA	NA
ENSG00000256514	AP003419.11	-0.313436	0.373187	NA	NA	0.154596	0.511509	-0.31827	0.155709	0.35219	0.290092	0.199801	0.39043	-0.164618	0.47979	0.730805	0.0059254	0.242311	0.293536	0.202299	0.391709	0.684363	0.00783649	NA	NA	NA	NA	NA	NA	NA	NA	NA	NA	NA	NA
ENSG00000269089	AP003733.1	NA	NA	NA	NA	3.46641	4.54189e-06	2.44261	0.000457926	NA	NA	3.08957	1.96554e-05	2.71367	0.000101961	NA	NA	2.49439	0.000395481	1.7971	0.00800831	NA	NA	NA	NA	NA	NA	NA	NA	NA	NA	NA	NA	NA	NA
ENSG00000181908	AP003774.4	NA	NA	NA	NA	5.63171	8.61353e-07	NA	NA	NA	NA	NA	NA	NA	NA	NA	NA	3.95346	2.84812e-06	3.48497	1.41413e-05	NA	NA	NA	NA	NA	NA	NA	NA	NA	NA	NA	NA	NA	NA
ENSG00000215527	AP005482.1	0.668324	0.222154	NA	NA	0.76344	0.0618217	0.324185	0.446261	0.142998	0.853171	0.0570362	0.898302	0.108045	0.805234	0.00412331	0.995651	0.487283	0.295863	0.35302	0.454949	NA	NA	NA	NA	NA	NA	NA	NA	NA	NA	NA	NA	NA	NA
ENSG00000231611	AP006216.11	NA	NA	NA	NA	NA	NA	NA	NA	NA	NA	NA	NA	NA	NA	-0.185472	0.838269	NA	NA	NA	NA	NA	NA	NA	NA	NA	NA	NA	NA	NA	NA	NA	NA	NA	NA
ENSG00000228463	AP006222.2	NA	NA	NA	NA	1.50802	0.000501457	1.97001	1.31355e-05	NA	NA	2.13113	8.73373e-06	2.39345	1.33132e-06	NA	NA	2.82321	7.76782e-08	2.522	4.47595e-07	NA	NA	NA	NA	NA	NA	NA	NA	NA	NA	NA	NA	NA	NA
ENSG00000239685	AP006309.4	0.176764	0.773965	NA	NA	1.14412	4.80611e-05	1.36328	1.26004e-06	0.262328	0.590444	1.38682	1.00373e-06	1.55347	4.33623e-08	0.211349	0.610842	1.00316	0.000458916	1.17811	3.80702e-05	0.416081	0.261328	NA	NA	NA	NA	NA	NA	NA	NA	NA	NA	NA	NA
ENSG00000177236	AP006621.1	-0.134768	0.872795	NA	NA	-0.451392	0.260929	-0.703472	0.0680354	0.603163	0.249905	-0.541522	0.178856	-0.567062	0.150389	0.50138	0.282595	-0.0505197	0.911565	-0.467865	0.255613	0.748273	0.0962182	NA	NA	NA	NA	NA	NA	NA	NA	NA	NA	NA	NA
ENSG00000255284	AP006621.5	-0.187675	0.796545	NA	NA	0.0642591	0.865891	0.094125	0.802161	0.636099	0.170738	0.0444846	0.908301	-0.322733	0.367786	0.655606	0.104243	1.13847	0.000768569	0.817283	0.0171275	1.00308	0.00973455	NA	NA	NA	NA	NA	NA	NA	NA	NA	NA	NA	NA
ENSG00000255142	AP006621.6	-0.19391	0.860913	NA	NA	-0.505029	0.327225	-0.476887	0.340002	0.917453	0.169109	NA	NA	NA	NA	0.817685	0.168169	NA	NA	NA	NA	1.28203	0.0380573	NA	NA	NA	NA	NA	NA	NA	NA	NA	NA	NA	NA
ENSG00000138660	AP1AR	-0.135444	0.803677	0.582274	0.487511	0.55232	0.0218944	0.774116	0.0011058	-0.00383835	0.994774	0.764	0.00136519	0.87949	0.00019603	0.23678	0.490309	0.630382	0.00892108	0.709427	0.00316158	0.0761528	0.844898	-0.68997	0.33527	0.339581	0.510368	0.151722	0.814614	-0.145935	0.937762	-0.236139	0.641313	-0.0537817	0.928139
ENSG00000100280	AP1B1	0.23285	0.584615	-0.0966279	0.82819	1.14994	1.88603e-05	1.33067	2.27857e-06	-0.570507	0.101843	0.959535	0.000192181	1.23647	6.21709e-06	-0.546274	0.0756447	0.704128	0.00398238	0.840044	0.000884607	-0.438867	0.143143	-0.0068433	0.982142	0.805726	3.11043e-05	-1.06571	3.0309e-06	0.211246	0.341635	0.649541	0.000151065	-0.984068	4.12316e-06
ENSG00000166747	AP1G1	0.206687	0.59442	-0.0462636	0.977328	-0.0875678	0.706036	0.10364	0.652691	-0.0905877	0.829359	-0.196861	0.377675	-0.0554425	0.813483	-0.156744	0.615868	-0.495553	0.0194265	-0.276251	0.212077	-0.186454	0.524109	-0.419505	0.265807	-0.0753211	0.799295	-0.455142	0.120774	-0.110374	0.89755	-0.439947	0.0922804	-0.77126	0.00635322
ENSG00000213983	AP1G2	0.242354	0.637971	-0.0718738	0.90187	0.409538	0.138202	0.264584	0.346347	0.537057	0.183247	0.243531	0.388789	0.0261405	0.933153	0.606227	0.0862581	0.451183	0.107747	0.0455789	0.884014	0.831222	0.0172219	0.78516	0.000310132	-0.37894	0.02516	1.05138	8.20271e-06	0.555499	0.00517213	-0.474903	0.00377581	1.45348	5.51876e-08
ENSG00000072958	AP1M1	0.238702	0.515869	-0.000201993	0.999593	-0.944916	4.32755e-06	-0.971799	2.2836e-06	-0.403749	0.189735	-0.949804	3.87608e-06	-0.865895	2.3373e-05	-0.368924	0.175774	-0.759395	0.000261703	-0.761111	0.000261882	-0.390483	0.137778	0.287824	0.456781	-0.565801	0.0359187	-0.0680977	0.848196	0.0745219	0.941385	-0.132485	0.606522	0.144492	0.602683
ENSG00000129354	AP1M2	3.41709	5.81543e-08	NA	NA	2.05099	1.55599e-05	1.0197	0.0184787	NA	NA	-0.57747	0.113335	-1.00786	0.00727313	-1.05357	0.024139	-2.47417	1.82571e-07	-2.60743	9.15105e-08	-0.883955	0.0429739	NA	NA	NA	NA	NA	NA	NA	NA	NA	NA	NA	NA
ENSG00000106367	AP1S1	0.480463	0.0969345	0.0759453	0.956349	-0.15062	0.518932	-0.107569	0.650411	-0.0979923	0.821104	-0.20819	0.36304	-0.0944938	0.689341	-0.0796163	0.824979	0.0219807	0.930407	0.237546	0.301097	0.177644	0.560677	-0.0904113	0.838524	-0.50982	0.0659896	-0.606678	0.0471705	-0.347682	0.411737	0.00191244	0.994941	-0.440482	0.104279
ENSG00000182287	AP1S2	0.240863	0.558923	0.880527	0.000158527	0.498478	0.0352497	0.64896	0.00689794	0.24085	0.529891	0.689592	0.00453002	0.67473	0.00499444	0.409767	0.174516	0.186466	0.439775	0.21662	0.372064	0.201348	0.520979	1.0704	2.13562e-05	1.68108	1.12571e-08	0.610733	0.00239623	1.07043	5.87389e-06	1.99816	3.66097e-10	0.450875	0.0104674
ENSG00000152056	AP1S3	1.23391	1.98752e-06	-1.03592	0.107957	2.0792	2.13402e-11	1.91241	8.30643e-11	-0.682304	0.0409635	1.43787	1.58646e-08	1.1905	2.73267e-07	-0.727418	0.0103429	1.07812	3.19347e-06	1.18243	6.17169e-07	-0.639576	0.0220332	0.989544	0.126539	3.98018	1.98902e-07	-1.67406	0.00522498	0.876804	0.137344	2.93796	1.18356e-06	-1.95537	0.000690491
ENSG00000196961	AP2A1	0.100754	0.838829	-0.0753386	0.893287	0.979301	1.34121e-05	1.18773	8.61809e-07	-0.265694	0.438376	1.07007	4.17586e-06	1.35596	1.01799e-07	-0.116295	0.722953	0.714947	0.000685024	0.970582	2.03547e-05	-0.106455	0.74264	-0.0481213	0.867968	0.980008	9.08562e-06	-0.0236114	0.921066	0.176994	0.524453	0.942705	5.8379e-06	-0.181128	0.292303
ENSG00000183020	AP2A2	-0.00875838	0.988661	-0.124849	0.851573	-0.0273571	0.907876	-0.235508	0.275787	-0.142224	0.714316	-0.146217	0.515994	-0.332593	0.115119	0.0326622	0.930479	0.119067	0.605106	-0.119447	0.607666	0.0260512	0.941344	-7.04353e-05	0.99985	0.154279	0.516504	0.316428	0.207701	0.113687	0.856412	-0.162064	0.477783	0.0886512	0.720822
ENSG00000006125	AP2B1	0.29464	0.396004	0.0391823	0.993471	-0.811021	0.00010957	-0.844906	5.48118e-05	-0.231952	0.515574	-0.89742	1.88894e-05	-0.952474	5.19601e-06	-0.0835792	0.811135	-1.08422	3.49035e-07	-1.00179	2.56683e-06	-0.0335066	0.926801	-0.598789	0.410451	-0.233087	0.661109	-0.110987	0.868174	-0.116922	0.95344	-0.96494	0.0474631	-0.148996	0.787013
ENSG00000161203	AP2M1	-0.00941419	0.988398	-0.193981	0.764749	-0.895203	2.29691e-05	-0.855047	5.2861e-05	-0.0596735	0.89351	-0.68636	0.0012899	-0.699565	0.000955195	-0.00306347	0.994822	-0.469304	0.0312911	-0.32143	0.152395	-0.110574	0.737796	-0.173843	0.651927	-0.42237	0.104327	-0.185922	0.554143	-0.242448	0.610432	-0.114766	0.645771	-0.0470814	0.872787
ENSG00000042753	AP2S1	0.386451	0.191512	-0.0517861	0.989671	0.291139	0.175274	0.292306	0.171461	-0.573149	0.0494082	0.139783	0.536181	0.209627	0.335144	-0.511275	0.0477722	0.335067	0.119476	0.429041	0.0436238	-0.423307	0.0986976	0.274302	0.677894	-0.160326	0.737351	-0.673205	0.173196	0.0837695	0.966703	0.696942	0.0841298	-0.249417	0.593321
ENSG00000132842	AP3B1	-0.0263719	0.964207	-0.14028	0.742693	0.190293	0.38949	0.248235	0.250464	-0.0522541	0.904785	0.0481971	0.839254	0.133204	0.550943	-0.0905258	0.785725	-0.200098	0.368553	-0.0231593	0.924682	0.00522034	0.987819	-0.20713	0.455922	-0.178166	0.351116	-0.42932	0.0317195	-0.132844	0.72627	-0.498285	0.00827501	-0.670876	0.000958871
ENSG00000103723	AP3B2	NA	NA	NA	NA	NA	NA	NA	NA	NA	NA	5.87144	2.04979e-06	NA	NA	NA	NA	3.29696	7.45198e-06	2.66733	9.01921e-05	0.311205	0.729566	NA	NA	2.26301	1.53054e-05	NA	NA	NA	NA	1.10228	0.00292252	1.31552	0.000897011
ENSG00000065000	AP3D1	0.162901	0.703638	-0.0839559	0.824643	0.0740713	0.753422	0.235554	0.284251	-0.426843	0.166761	0.0853668	0.716298	0.235989	0.282297	-0.283535	0.322411	-0.088211	0.709799	0.0339484	0.89236	-0.476979	0.063503	-0.00332982	0.989619	0.632882	5.76657e-05	0.415334	0.00601098	0.0215653	0.973776	0.719375	4.52503e-06	0.407266	0.00319619
ENSG00000185009	AP3M1	0.0514032	0.920443	-0.131659	0.917939	-0.424399	0.043209	0.172871	0.433799	-0.170603	0.645026	-0.140267	0.534722	0.188328	0.389503	-0.172803	0.571426	-0.335644	0.118385	0.0113342	0.962645	-0.0305573	0.931728	-0.000868161	0.999376	0.519137	0.143767	-0.0947045	0.837669	0.212687	0.799168	-0.153762	0.668496	-0.622973	0.0765836
ENSG00000070718	AP3M2	-0.175666	0.711375	0.0286414	0.984222	-0.363432	0.125882	0.0836784	0.745734	-0.20939	0.60234	-0.120888	0.636198	-0.0262787	0.922992	-0.440152	0.141463	-0.171422	0.494147	-0.0999139	0.702494	-0.279459	0.364192	-0.478691	0.0625015	0.10111	0.629955	-0.324071	0.138951	-0.265177	0.365669	-0.273244	0.155738	-0.244376	0.22197
ENSG00000177879	AP3S1	-0.00642118	0.991578	0.23774	0.575677	0.46656	0.0254517	0.398791	0.0572216	0.126225	0.751244	0.430778	0.0403053	0.331774	0.11629	0.205072	0.488165	-0.0626856	0.791647	0.137263	0.551678	-0.0173689	0.960502	0.365925	0.218558	0.282688	0.20605	0.412262	0.0961832	0.0356997	0.974225	0.647582	0.00240507	0.483444	0.0276097
ENSG00000157823	AP3S2	-0.0609263	0.905959	-0.278167	0.120145	0.172907	0.440077	0.417918	0.0473114	0.00955844	0.984028	0.339362	0.114178	0.477164	0.0223174	-0.00605937	0.989049	0.594153	0.0046551	0.598248	0.00445797	0.218608	0.448298	0.375372	0.0204819	0.401998	0.00366714	0.511826	0.00115511	0.238995	0.170906	0.404134	0.00158245	0.47609	0.000792295
ENSG00000134262	AP4B1	0.261209	0.534696	0.0714747	0.919013	-0.450513	0.0604305	-0.387993	0.107968	0.0349855	0.946191	-0.647841	0.0061281	-0.557265	0.0182788	-0.310562	0.335799	-0.144114	0.578789	-0.224715	0.377476	-0.23991	0.461168	-0.145915	0.629176	-0.266717	0.181958	-0.621971	0.0047626	0.103099	0.840476	-0.387202	0.0449907	-0.489078	0.0142409
ENSG00000081014	AP4E1	0.163883	0.702931	-0.0131153	0.998915	0.154161	0.498312	0.103452	0.655254	0.0637068	0.883069	0.0314455	0.895542	-0.0628065	0.789866	0.104356	0.755936	-0.170882	0.453948	-0.178033	0.43945	0.0900931	0.786958	-0.986308	0.585079	1.29067	0.286738	-0.180879	0.911975	-0.0428896	0.996099	0.0080683	0.995249	-0.317417	0.811233
ENSG00000221838	AP4M1	-0.29159	0.520952	-0.0242441	0.991931	-1.68695	1.14003e-10	-1.55962	2.0744e-09	0.115849	0.821269	-1.67091	2.41095e-10	-1.61793	7.11445e-10	0.413993	0.224785	-1.36932	1.61176e-07	-1.40311	8.48412e-08	0.664402	0.0324169	0.0539121	0.901999	-1.60559	3.20335e-06	0.489367	0.0828853	-0.183392	0.737729	-1.29844	1.60351e-05	0.361014	0.146235
ENSG00000100478	AP4S1	0.254385	0.667205	-0.223992	0.651755	-1.4526	4.42379e-06	-1.77256	1.93061e-07	0.225092	0.681597	-1.46611	3.88676e-06	-2.07331	1.43452e-08	-0.04606	0.931693	-1.3676	2.2057e-05	-1.42227	1.02633e-05	0.290792	0.49936	0.268969	0.432162	-0.977871	0.000337215	0.479564	0.064823	0.116962	0.864504	-0.609717	0.00783533	0.193618	0.414517
ENSG00000254470	AP5B1	-0.043131	0.947957	-0.129129	0.771662	-1.90355	3.71593e-12	-2.13942	4.09991e-13	-0.367054	0.338809	-1.99838	1.81246e-12	-2.10309	6.02511e-13	-0.453531	0.155957	-1.63141	1.00605e-10	-2.10327	1.23554e-12	-0.667262	0.023344	-0.258273	0.326413	-1.85437	8.0536e-09	0.48778	0.0148618	-0.204928	0.473805	-1.95757	2.69173e-09	0.136894	0.463565
ENSG00000053770	AP5M1	-0.0915058	0.862758	-0.128391	0.83375	-0.153975	0.522576	-0.223939	0.338174	0.172751	0.670045	-0.176161	0.462234	-0.33415	0.142539	0.124635	0.71816	-0.178234	0.457962	-0.106471	0.672202	0.114646	0.737757	0.141183	0.67278	-0.256239	0.247237	-0.175373	0.486785	0.200517	0.595275	-0.585484	0.00808091	-0.49224	0.0248896
ENSG00000125843	AP5S1	0.143596	0.805007	-0.496173	0.336619	-1.24617	1.02288e-06	-1.46238	1.38514e-08	-0.394702	0.317385	-1.55203	2.1638e-09	-1.78093	3.76762e-11	-0.399494	0.240425	-0.879512	0.000617815	-1.1794	4.92441e-06	-0.0408883	0.92616	0.307822	0.530693	-2.16716	2.72012e-06	-0.08685	0.846349	-0.194315	0.81908	-1.56684	4.27317e-05	-0.145828	0.683653
ENSG00000242802	AP5Z1	0.120246	0.870456	0.00570555	0.996896	-0.331813	0.304769	0.0101957	0.977254	-0.500416	0.312894	-0.192815	0.563381	0.103313	0.760249	-0.231569	0.621225	0.125996	0.711595	-0.208948	0.536912	-0.324508	0.457943	-0.333549	0.186959	-0.996415	2.31001e-05	0.535073	0.012616	-0.392115	0.107235	-0.763128	0.000165169	0.326945	0.075571
ENSG00000120868	APAF1	0.0513179	0.926708	0.701599	0.259405	-0.693541	0.00137968	-0.429442	0.052375	0.0208304	0.967229	-0.643834	0.00313889	-0.50253	0.0218181	-0.000207027	0.999584	-0.315471	0.165034	-0.0760424	0.761585	0.110305	0.743508	-0.673581	0.276619	-0.39038	0.385707	-0.534835	0.280853	-0.121513	0.942923	-0.8983	0.0384905	-0.622876	0.158557
ENSG00000107282	APBA1	NA	NA	0.504389	0.85777	5.64306	6.36061e-11	5.42459	1.30331e-10	NA	NA	5.14999	1.51734e-10	5.36721	6.80065e-11	NA	NA	4.63569	1.88928e-09	4.5057	3.39029e-09	NA	NA	-0.830184	0.556345	1.64018	0.0844121	-0.238371	0.847123	0.608682	0.772698	1.52264	0.0824255	-0.737927	0.455834
ENSG00000034053	APBA2	NA	NA	0.581369	0.0166909	NA	NA	NA	NA	NA	NA	NA	NA	NA	NA	NA	NA	-1.19532	0.00133991	-1.73154	3.46694e-05	-0.0488663	0.929567	0.198401	0.47178	-0.862015	0.000109985	0.3274	0.126154	0.13818	0.743011	-0.639356	0.000927262	0.146895	0.454764
ENSG00000011132	APBA3	-0.139183	0.818878	0.204539	0.794741	0.188645	0.51247	0.143473	0.623498	0.0295428	0.959729	0.191871	0.508871	0.30364	0.27652	0.0669587	0.88149	0.443931	0.107802	0.055054	0.861723	0.30488	0.396472	0.543124	0.166595	-0.317621	0.287343	0.731917	0.0261881	0.344221	0.46155	0.194417	0.487588	0.949029	0.00211938
ENSG00000166313	APBB1	-0.223445	0.575052	0.241123	0.684982	-0.0208244	0.933169	-0.477676	0.0282726	0.458403	0.146198	0.097266	0.686124	-0.220253	0.332686	0.667744	0.011707	-0.0202046	0.936615	-0.141277	0.55687	0.686703	0.00733773	0.370851	0.349444	0.568542	0.0412999	1.21592	0.000305926	0.657981	0.0406105	0.781958	0.00404466	1.2459	8.84755e-05
ENSG00000077420	APBB1IP	NA	NA	NA	NA	NA	NA	NA	NA	NA	NA	5.71588	7.08673e-08	4.55276	5.51109e-06	NA	NA	0.548899	0.274047	-0.0306767	0.955137	0.0703251	0.928189	NA	NA	NA	NA	NA	NA	NA	NA	0.922321	0.134645	NA	NA
ENSG00000163697	APBB2	0.51676	0.0506248	-0.043247	0.987213	1.45947	3.96176e-11	1.21112	4.38059e-09	0.161667	0.667603	0.975946	1.84597e-06	0.762454	0.000184681	0.23015	0.429478	0.317875	0.140734	0.132826	0.565557	0.315361	0.238322	-0.242118	0.634822	-0.108391	0.766431	0.182246	0.653114	-0.0837943	0.949471	-0.555219	0.0852193	0.359603	0.275814
ENSG00000113108	APBB3	-0.594838	0.0672309	-0.319121	0.451614	1.05134	8.56143e-05	1.25391	1.00367e-05	0.817046	0.0247808	1.04892	9.67391e-05	1.10588	5.5299e-05	1.06943	0.0014881	1.29385	7.75661e-06	1.13315	4.78904e-05	1.27067	0.000198058	0.295205	0.407942	0.927417	0.000711841	0.905173	0.00212027	0.315508	0.411078	1.25092	1.00209e-05	1.43734	6.71691e-06
ENSG00000134982	APC	0.374282	0.305996	0.229509	0.97252	0.0664034	0.80346	0.289565	0.238994	-0.0873704	0.856108	-0.266343	0.285432	-0.161716	0.523744	-0.320062	0.319077	0.127685	0.626395	0.209754	0.413569	-0.183969	0.586148	-1.39864	0.442946	0.929298	0.448698	-0.240327	0.882997	-0.244006	0.963457	-0.0923897	0.942416	-0.405641	0.761533
ENSG00000115266	APC2	-0.81785	0.12723	NA	NA	3.63627	3.41935e-10	3.52198	6.99692e-10	0.319205	0.620487	4.42429	2.089e-11	4.42119	2.25498e-11	0.882286	0.0766801	2.21007	1.14209e-06	1.60704	8.58224e-05	1.2472	0.0074329	1.77381	0.00400119	4.69652	1.53267e-08	NA	NA	0.989967	0.0787074	4.13469	6.44589e-09	0.288924	0.555266
ENSG00000154856	APCDD1	NA	NA	NA	NA	NA	NA	NA	NA	NA	NA	NA	NA	NA	NA	NA	NA	NA	NA	NA	NA	NA	NA	NA	NA	2.55006	0.00243314	1.992	0.0192197	3.11147	0.00664994	NA	NA	NA	NA
ENSG00000198768	APCDD1L	-5.55763	1.49525e-07	0.64358	0.280173	1.61877	0.00247842	0.653084	0.198286	-0.0648126	0.952087	6.15093	2.24924e-09	5.48749	1.48415e-08	NA	NA	-1.22835	0.0207496	-1.42314	0.00852863	-1.01527	0.112335	0.283527	0.64288	-0.6155	0.134805	-0.9524	0.0372975	0.719851	0.183365	-0.62403	0.107348	-1.67973	0.00049721
ENSG00000231290	APCDD1L-AS1	-1.66527	0.0247022	0.87681	0.468169	3.39331	7.8839e-08	1.75368	0.000595763	-0.0287707	0.978851	4.50588	3.98728e-09	3.59352	1.7644e-07	NA	NA	0.0557106	0.913412	-1.02394	0.0343689	-1.21501	0.0425948	0.75561	0.450919	-0.0239616	0.977148	-1.16777	0.14586	1.20273	0.211841	NA	NA	NA	NA
ENSG00000164062	APEH	0.15184	0.725864	0.0765932	0.900008	0.73155	0.000375245	1.02525	5.90585e-07	-0.176257	0.633688	0.69492	0.000753078	0.904974	9.43746e-06	-0.117582	0.714475	0.657961	0.00159565	0.829429	6.73157e-05	0.0872724	0.789812	0.237796	0.365043	0.66166	0.000996022	-0.416582	0.0359364	0.327384	0.150654	0.733226	0.000178045	-0.504935	0.00735528
ENSG00000100823	APEX1	0.216447	0.565795	0.171258	0.738783	-2.07275	1.18868e-13	-1.49329	7.5764e-11	-0.0322215	0.942904	-1.89781	7.26097e-13	-1.66722	1.01174e-11	-0.0189927	0.960361	-1.78834	4.388e-12	-1.4572	1.83614e-10	-0.0726215	0.826936	-0.205582	0.516997	-1.57644	4.95013e-07	-0.103144	0.708694	-0.387394	0.180705	-1.15716	6.97867e-06	-0.348489	0.0993032
ENSG00000169188	APEX2	0.547299	0.134562	0.213831	0.721715	-1.09769	4.29587e-05	-0.329438	0.240202	-0.237515	0.610607	-1.07174	6.62953e-05	-0.468558	0.087932	-0.621397	0.0626743	-0.686151	0.0117353	-0.304031	0.289324	-0.442882	0.197915	-0.173671	0.672733	0.242982	0.378245	-0.351528	0.233609	-0.00405165	0.99867	0.171918	0.519702	-0.599897	0.0262601
ENSG00000117362	APH1A	0.0768359	0.876047	0.262666	0.201768	-1.67076	1.20931e-14	-1.13409	3.42255e-08	-0.225977	0.516022	-1.59254	5.79807e-14	-1.24303	1.69191e-09	-0.241142	0.406112	-1.57111	2.36925e-13	-1.13653	5.23708e-08	-0.20304	0.482136	-0.106967	0.639114	-1.08402	5.46456e-07	0.211855	0.204152	-0.00929457	0.990747	-1.05973	2.87347e-07	0.275285	0.0595853
ENSG00000138613	APH1B	0.812031	0.00597295	-0.113486	0.890806	0.513827	0.0436227	0.077422	0.784481	-0.0468592	0.932166	-0.00400268	0.988927	-0.380081	0.139886	-0.140747	0.715672	0.524489	0.0400307	0.426848	0.100244	0.457813	0.148443	0.188711	0.615713	0.238765	0.344788	0.305471	0.278419	0.337357	0.343622	-0.276638	0.243986	0.680135	0.00738224
ENSG00000166181	API5	0.183414	0.647015	0.218969	0.963491	0.326271	0.125763	0.832137	4.62569e-05	-0.181527	0.619222	0.223154	0.307957	0.696163	0.000652566	-0.305686	0.271423	0.222897	0.312435	0.558555	0.00764593	-0.354102	0.17779	-0.663755	0.632893	1.20731	0.192834	-0.408022	0.724611	0.0721828	0.989301	0.200248	0.832171	-0.94581	0.312886
ENSG00000234558	API5P1	0.350282	0.688473	0.33332	0.926992	0.589954	0.197897	1.17693	0.00906816	0.366438	0.641399	0.292048	0.531081	0.912315	0.036015	-0.361857	0.57187	0.516391	0.255663	0.628715	0.156441	NA	NA	-0.631014	0.660895	0.986658	0.295119	-0.674489	0.551493	NA	NA	NA	NA	NA	NA
ENSG00000213962	API5P2	NA	NA	NA	NA	NA	NA	NA	NA	NA	NA	NA	NA	NA	NA	NA	NA	NA	NA	NA	NA	NA	NA	NA	NA	0.9339	0.357234	NA	NA	NA	NA	NA	NA	NA	NA
ENSG00000149089	APIP	0.239873	0.619927	0.272702	0.330185	-0.581136	0.0243561	-0.979032	0.000116892	0.0226926	0.969	-0.979265	0.000120991	-1.45594	1.44438e-08	-0.07228	0.867801	-1.19062	3.02576e-06	-1.4844	1.15451e-08	-0.387662	0.239944	0.0818475	0.778892	-0.257438	0.173755	-0.164674	0.453161	-0.04697	0.951191	-0.596704	0.0019037	-0.177449	0.349439
ENSG00000175279	APITD1	0.320378	0.467085	NA	NA	-0.743763	0.00413321	0.117865	0.681521	-0.378217	0.348909	-0.564633	0.0318269	0.0776295	0.78946	-0.564862	0.0840576	-0.276376	0.31413	-0.0308788	0.919351	-0.298313	0.391398	NA	NA	NA	NA	NA	NA	NA	NA	NA	NA	NA	NA
ENSG00000251503	APITD1-CORT	0.29376	0.564758	NA	NA	-0.958834	0.00103284	-0.0990931	0.755461	-0.491104	0.24369	-0.751238	0.00943296	-0.118421	0.707199	-0.596795	0.0924703	-0.38324	0.20234	-0.0804174	0.808762	-0.320733	0.403915	NA	NA	NA	NA	NA	NA	NA	NA	NA	NA	NA	NA
ENSG00000169621	APLF	-1.94614	6.60218e-06	0.583409	0.0683769	1.05076	0.000908355	0.661059	0.0354723	0.0199367	0.976363	2.76108	2.19386e-09	2.4115	2.19839e-08	1.21981	0.00407772	1.20099	0.000232822	0.951022	0.00237859	0.790933	0.0305649	0.00899417	0.986062	0.143362	0.592166	0.632469	0.022495	0.181996	0.734799	-0.0744524	0.782444	0.848236	0.00167275
ENSG00000171388	APLN	2.41766	3.86628e-05	-0.631226	0.639653	3.78982	2.19514e-09	3.0637	9.69377e-08	NA	NA	1.42101	0.000462581	1.18578	0.0023667	-1.77366	0.00165848	-1.5388	0.000121294	-2.24272	1.04273e-06	-2.91566	1.30109e-06	-0.537893	0.585768	-0.375493	0.584936	-5.37975	3.69186e-06	-0.888632	0.357761	-0.947212	0.132716	-3.55971	7.01473e-05
ENSG00000105290	APLP1	-0.972229	3.93781e-05	-1.52403	2.72904e-05	1.46306	3.40989e-10	1.53769	1.72557e-10	0.146729	0.716802	2.03942	9.5151e-13	2.22088	2.31173e-13	0.390057	0.165672	0.454486	0.0358653	0.48678	0.0247408	0.408654	0.127652	1.1727	0.00024805	2.35229	1.22551e-08	-0.965485	0.000958897	0.473733	0.11823	1.41537	1.22361e-06	0.129211	0.607164
ENSG00000084234	APLP2	-0.404085	0.196526	-0.339615	0.861569	0.976295	4.87624e-06	0.913051	1.92779e-05	0.234608	0.522121	1.08911	3.8543e-07	1.0754	4.96166e-07	0.336434	0.247891	0.826813	0.000127586	0.905974	2.92384e-05	0.386348	0.160547	-0.173238	0.869718	1.66102	0.0130287	0.400346	0.600604	0.152123	0.952606	0.700655	0.242053	0.213048	0.757355
ENSG00000101474	APMAP	0.174864	0.675561	-0.119082	0.712275	0.953388	4.41388e-06	1.11667	8.58966e-08	-0.260956	0.448222	0.760662	0.000264067	0.951291	4.37569e-06	-0.223887	0.453455	0.362856	0.0946812	0.632175	0.00284126	0.070882	0.834232	0.144847	0.498391	0.966591	1.33727e-06	-0.273787	0.0824281	0.221611	0.253036	0.905031	8.95665e-07	0.0135579	0.937122
ENSG00000118137	APOA1	NA	NA	NA	NA	NA	NA	NA	NA	NA	NA	NA	NA	NA	NA	NA	NA	NA	NA	NA	NA	NA	NA	NA	NA	NA	NA	NA	NA	2.00789	0.0405051	NA	NA	NA	NA
ENSG00000163382	APOA1BP	0.255095	0.50231	NA	NA	0.446559	0.0411521	0.50371	0.0202162	-0.193193	0.612763	0.3182	0.155208	0.44329	0.0416273	-0.266375	0.37668	0.0310526	0.902065	0.0701461	0.778459	0.00103932	0.99752	NA	NA	NA	NA	NA	NA	NA	NA	NA	NA	NA	NA
ENSG00000084674	APOB	NA	NA	NA	NA	NA	NA	NA	NA	NA	NA	NA	NA	NA	NA	NA	NA	NA	NA	NA	NA	NA	NA	NA	NA	NA	NA	NA	NA	NA	NA	NA	NA	4.23396	9.5774e-05
ENSG00000179750	APOBEC3B	0.419846	0.654469	0.466594	0.598152	-3.23101	1.11141e-06	-3.40713	5.29867e-07	-1.68682	0.0274016	-2.62256	1.62238e-05	-2.55429	1.93063e-05	-1.30173	0.0447573	-1.181	0.0228353	-1.46076	0.00616601	-0.904123	0.154377	-1.94807	0.00137715	-3.84545	2.93768e-07	-3.2303	6.24365e-06	-2.34144	0.000220587	-2.53507	1.35086e-05	-2.04748	0.000256609
ENSG00000244509	APOBEC3C	0.324364	0.476591	-0.0238649	0.995022	-1.69114	6.11409e-07	-2.28758	6.12256e-09	0.123968	0.811638	-1.56438	2.07605e-06	-1.97763	6.09365e-08	0.0908314	0.834565	-0.975621	0.000826322	-1.30924	3.27078e-05	0.232392	0.530455	-0.0670328	0.938242	-1.77369	0.000984375	-0.304588	0.605086	-0.450884	0.614452	-0.790427	0.0800865	0.385735	0.428604
ENSG00000243811	APOBEC3D	-0.421436	0.695335	NA	NA	0.206128	0.718636	-1.25659	0.0316941	0.336654	0.729735	0.337494	0.565182	-0.0416889	0.947427	0.459959	0.556493	0.67496	0.19712	0.254602	0.646664	0.990543	0.120194	0.500281	0.480183	NA	NA	NA	NA	NA	NA	NA	NA	NA	NA
ENSG00000128394	APOBEC3F	-0.123971	0.899843	0.00542849	0.998094	0.309535	0.470095	-0.787047	0.0636013	0.369974	0.598852	0.721191	0.0861288	0.218879	0.614625	0.475449	0.400628	0.466033	0.277348	-0.273052	0.542998	0.456474	0.414234	0.246115	0.558329	-0.962945	0.00202019	0.349476	0.28251	0.434627	0.277681	-0.768985	0.00667462	0.690314	0.0150675
ENSG00000239713	APOBEC3G	-0.222401	0.881417	0.049325	0.992044	1.32899	0.0362208	-0.00819232	0.991026	0.605136	0.568614	1.508	0.0197919	0.784432	0.219539	0.527261	0.562808	0.557432	0.376231	-0.274823	0.681173	0.668763	0.410265	0.531369	0.491742	-1.07444	0.0456361	0.227991	0.736414	0.0108304	0.998071	-0.987236	0.050867	0.665742	0.196081
ENSG00000184730	APOBR	NA	NA	NA	NA	NA	NA	NA	NA	NA	NA	NA	NA	NA	NA	NA	NA	1.55802	0.0231728	NA	NA	NA	NA	NA	NA	NA	NA	NA	NA	NA	NA	NA	NA	NA	NA
ENSG00000130208	APOC1	-2.00002	0.0138763	NA	NA	-1.77734	0.00762691	-2.03249	0.00272973	0.413314	0.691754	-2.03327	0.0120563	-1.81571	0.0174278	1.22588	0.132713	NA	NA	NA	NA	NA	NA	0.911422	0.286137	NA	NA	0.912386	0.181993	0.000481209	0.999908	NA	NA	1.15309	0.0534236
ENSG00000110245	APOC3	NA	NA	NA	NA	NA	NA	NA	NA	NA	NA	NA	NA	NA	NA	NA	NA	NA	NA	NA	NA	NA	NA	NA	NA	NA	NA	NA	NA	4.28072	0.00264298	NA	NA	NA	NA
ENSG00000189058	APOD	NA	NA	-2.0458	0.00516922	5.01091	8.6219e-08	3.76442	1.06379e-05	NA	NA	NA	NA	NA	NA	NA	NA	NA	NA	NA	NA	NA	NA	0.62881	0.430461	-0.680155	0.220969	1.95787	0.00248234	0.481716	0.623582	0.0124796	0.982911	2.28056	0.000197025
ENSG00000130203	APOE	-2.58903	0.000591483	-0.0562024	0.990659	-0.0802491	0.892588	-0.3428	0.549839	0.489621	0.601909	-0.152862	0.801905	-0.398118	0.494561	1.80891	0.015249	0.699976	0.256241	0.626317	0.315244	-0.246606	0.799573	2.28933	0.00136974	1.02056	0.0621265	1.92053	0.00278045	2.36339	0.000427509	1.68565	0.00167245	2.39912	0.000128762
ENSG00000100342	APOL1	-1.36403	0.0497903	-1.32719	0.199711	0.295538	0.580791	-0.528791	0.311513	0.292919	0.76021	2.42091	5.88896e-05	1.91833	0.0006871	1.07778	0.112315	1.26246	0.0170333	0.562289	0.286978	0.706593	0.288471	0.261796	0.821196	-0.208815	0.791931	-0.572708	0.508545	-0.0873065	0.981517	-0.618396	0.369224	-0.196441	0.805607
ENSG00000128335	APOL2	-0.555614	0.450521	-1.03784	0.000261207	0.608518	0.16629	-0.22992	0.617418	-0.0596245	0.949939	2.40841	6.71866e-06	2.13822	2.99878e-05	0.186092	0.786873	1.63555	0.000653225	1.0937	0.0160687	0.00404881	0.995177	-0.767853	0.00341584	-1.75105	8.44611e-08	-1.12925	4.59341e-05	-0.787846	0.00202998	-1.85496	1.2571e-08	-0.809672	0.000480572
ENSG00000128284	APOL3	-1.37555	0.0740165	-0.392203	0.36403	1.12895	0.0436525	-0.064572	0.915888	0.689706	0.435578	3.10681	7.93592e-06	2.62175	6.26831e-05	1.51363	0.0418511	3.43549	2.48824e-06	3.0759	1.12696e-05	1.24743	0.0818196	-0.0649706	0.887661	-1.27727	0.000101212	0.597735	0.0482037	-0.557241	0.114342	-1.3995	1.88169e-05	0.0368687	0.906375
[truncated: 19,926 more rows]

## Sheet: 5B-Mouse
Supplemental Table 5B. Transcriptomic differences in an isogenic pair of untreated and drug-treated merlin-deficient and merlin-expressing mouse SC
[truncated: 13,824 more rows]
